# Supplementary material for: scifi-ATAC-seq: massive-scale single-cell chromatin accessibility sequencing using combinatorial fluidic indexing
Source: Genome Biol. 2024 Apr 8;25:90. doi: 10.1186/s13059-024-03235-5 (PMC11003106; doi:10.1186/s13059-024-03235-5)
Supplement: Supplementary file 2 — Additional file 2. [file 13059_2024_3235_MOESM2_ESM.xlsx]

## Sheet: Table S1
Table S1: oligos for scifi-ATAC-seq
Steps	Primer id	Sequence	Barcode seq
Tn5 assembly	Tn5-ME-A1	5'-TCGTCGGCAGCGTCGATATGTGATAATGAGGACCGTATAGATGTGTATAAGAGACAG-3'	CGTAT
Tn5 assembly	Tn5-ME-A2	5'-TCGTCGGCAGCGTCGATATGTGATAATGAGGACTCGCTAGATGTGTATAAGAGACAG-3'	TCGCT
Tn5 assembly	Tn5-ME-A3	5'-TCGTCGGCAGCGTCGATATGTGATAATGAGGACCTTAGAGATGTGTATAAGAGACAG-3'	CTTAG
Tn5 assembly	Tn5-ME-A4	5'-TCGTCGGCAGCGTCGATATGTGATAATGAGGACCGACAAGATGTGTATAAGAGACAG-3'	CGACA
Tn5 assembly	Tn5-ME-A5	5'-TCGTCGGCAGCGTCGATATGTGATAATGAGGACACTACAGATGTGTATAAGAGACAG-3'	ACTAC
Tn5 assembly	Tn5-ME-A6	5'-TCGTCGGCAGCGTCGATATGTGATAATGAGGACTATACAGATGTGTATAAGAGACAG-3'	TATAC
Tn5 assembly	Tn5-ME-A7	5'-TCGTCGGCAGCGTCGATATGTGATAATGAGGACGGAATAGATGTGTATAAGAGACAG-3'	GGAAT
Tn5 assembly	Tn5-ME-A8	5'-TCGTCGGCAGCGTCGATATGTGATAATGAGGACAAGTCAGATGTGTATAAGAGACAG-3'	AAGTC
Tn5 assembly	Tn5-ME-A9	5'-TCGTCGGCAGCGTCGATATGTGATAATGAGGACAGTAAAGATGTGTATAAGAGACAG-3'	AGTAA
Tn5 assembly	Tn5-ME-A10	5'-TCGTCGGCAGCGTCGATATGTGATAATGAGGACAATTGAGATGTGTATAAGAGACAG-3'	AATTG
Tn5 assembly	Tn5-ME-A11	5'-TCGTCGGCAGCGTCGATATGTGATAATGAGGACAGATGAGATGTGTATAAGAGACAG-3'	AGATG
Tn5 assembly	Tn5-ME-A12	5'-TCGTCGGCAGCGTCGATATGTGATAATGAGGACCGCGAAGATGTGTATAAGAGACAG-3'	CGCGA
Tn5 assembly	Tn5-ME-B1	5'-GTCTCGTGGGCTCGGTGAATGTGTAGAAGACAGATCGGAAGATGTGTATAAGAGACAG-3'	TCGGA
Tn5 assembly	Tn5-ME-B2	5'-GTCTCGTGGGCTCGGTGAATGTGTAGAAGACAGAGTTTCAGATGTGTATAAGAGACAG-3'	GTTTC
Tn5 assembly	Tn5-ME-B3	5'-GTCTCGTGGGCTCGGTGAATGTGTAGAAGACAGAAGCTTAGATGTGTATAAGAGACAG-3'	AGCTT
Tn5 assembly	Tn5-ME-B4	5'-GTCTCGTGGGCTCGGTGAATGTGTAGAAGACAGATCATTAGATGTGTATAAGAGACAG-3'	TCATT
Tn5 assembly	Tn5-ME-B5	5'-GTCTCGTGGGCTCGGTGAATGTGTAGAAGACAGAGCTCCAGATGTGTATAAGAGACAG-3'	GCTCC
Tn5 assembly	Tn5-ME-B6	5'-GTCTCGTGGGCTCGGTGAATGTGTAGAAGACAGAACTAAAGATGTGTATAAGAGACAG-3'	ACTAA
Tn5 assembly	Tn5-ME-B7	5'-GTCTCGTGGGCTCGGTGAATGTGTAGAAGACAGACGAGGAGATGTGTATAAGAGACAG-3'	CGAGG
Tn5 assembly	Tn5-ME-B8	5'-GTCTCGTGGGCTCGGTGAATGTGTAGAAGACAGAACCGGAGATGTGTATAAGAGACAG-3'	ACCGG
Tn5 assembly	Tn5MErev	5'-[phos]CTGTCTCTTATACACATCT-3'
qPCR primer set	scifi-qPCR-F	5'-TCGTCGGCAGCGTCGATATGTGATAATGAGGAC-3'
qPCR primer set	scifi-qPCR-R	5'-GTCTCGTGGGCTCGGTGAATGTGTAGAAGACAGA-3'
Custom sequencing primers set	1_Read1	5’-TCGTCGGCAGCGTCGATATGTGATAATGAGGAC-3’	HPLC purified
Custom sequencing primers set	2_Index1(i7)	5’-TCTGTCTTCTACACATTCACCGAGCCCACGAGAC-3’	HPLC purified
Custom sequencing primers set	3_Index2(i5)	5’-GTCCTCATTATCACATATCGACGCTGCCGACGA-3’	HPLC purified
Custom sequencing primers set	4_Read2	5’-GTCTCGTGGGCTCGGTGAATGTGTAGAAGACAGA-3’	HPLC purified

## Sheet: Table S2
Table S2: Reagents for scifi-ATAC-seq
Steps	Name	Vendor	Cat#
Nuclei isolation	MES
Nuclei isolation	5M NaCl	Thermo Fisher Scientific	AM9760G
Nuclei isolation	Sucrose
Nuclei isolation	Spermine	Sigma-Aldrich	85590
Nuclei isolation	Spermidine	Sigma-Aldrich	85558
Nuclei isolation	DTT	Fisher Scientific	FERR0861
Nuclei isolation	10% BSA	Miltenyi Biotec	130-091-376
Nuclei isolation	pluriStrainer Mini 40 µm (Cell Strainer)	pluriSelect	43-10040-40
Nuclei isolation	pluriStrainer Mini 20 µm (Cell Strainer)	pluriSelect	43-10020-60
Nuclei isolation	Tween 20
Nuclei isolation	Triton™ X-100,for molecular biology	Sigma-Aldrich	T8787-250ML
Nuclei isolation	Digitonin	Thermo Scientific	BN2006
Nuclei isolation	Percoll	Sigma-Aldrich	P1644-1L
Nuclei isolation	DAPI	Sigma-Aldrich	D8417
Tn5 tagmentation	TAPS	Alfa Aesar	A17754
Tn5 tagmentation	MgCl2
Tagmentation stop buffer	Tris Base	Sigma-Aldrich	77861
Tagmentation stop buffer	EDTA	Sigma-Aldrich	E9884
Library preparation	Chromium Next GEM Single Cell ATAC Library & Gel Bead Kit	10X Genomics	16 rxns PN-1000175
Library preparation	Chromium Next GEM Chip H Single Cell Kit	10X Genomics	48 rxns PN-1000161
Library preparation	Single Index Kit N, Set A,	10X Genomics	96 rxns PN-1000212
Library preparation	2x Luna® Universal qPCR Master Mix	NEB	M3003

## Sheet: Table S3
Table S3: Meta data for integrated scifi-ATAC-seq and 10X scATAC-seq
cellID	total	tss	acrs	ptmt	nSites	log10nSites	pTSS	FRiP	pOrg	unique	tech	librtenx_B73ry	genotype	bayes.type	umap1	umap2	doubletscore	d.type	LouvainClusters	Cell_type
CB:Z:AACTTGGCAATACTGC-pool21	408812	111348	119512	2	187786	5.27366	0.27237	0.29234	4.89222e-06	408812	10x	tenx_B73	B73	NA	0.0630764	2.27816	0.178846	singlet	1	Protoderm
CB:Z:GCATTCCGTCTGTCCT-pool21	66734	27542	35388	0	30441	4.48346	0.412713	0.530284	0	66734	10x	tenx_B73	B73	NA	-1.9883	5.19018	0.140385	singlet	9	Vascular_parenchyma_precursor
CB:Z:AATGTCGCAAGCACTT-pool21	45414	15649	21860	4	22102	4.34443	0.344585	0.481349	8.80786e-05	45414	10x	tenx_B73	B73	NA	0.967712	0.822533	0.159615	singlet	5	Ground_meristem
CB:Z:CATGCCTCATAGTCCA-pool21	206707	50414	51057	14	103135	5.01341	0.243891	0.247002	6.77287e-05	206707	10x	tenx_B73	B73	NA	0.188742	1.75308	0.159615	singlet	1	Protoderm
CB:Z:CAAGGCCAGGCATGCA-pool21	8676	2584	3183	0	4618	3.66445	0.297833	0.366874	0	8676	10x	tenx_B73	B73	NA	2.35726	-0.0557668	0.126923	singlet	11	Mesophyll
CB:Z:CCAGATATCTTAGTGG-pool21	47622	16187	21168	2	23288	4.36713	0.339906	0.4445	4.19974e-05	47622	10x	tenx_B73	B73	NA	-2.16502	2.49455	0.144231	singlet	12	Epidermis
CB:Z:CCGCATTCAATGCCAT-pool21	303134	108172	131337	6	125756	5.09953	0.356845	0.433264	1.97932e-05	303134	10x	tenx_B73	B73	NA	0.0598423	2.28323	0.182692	singlet	1	Protoderm
CB:Z:GCGCCAAGTATGGTTC-pool21	21716	6412	8811	2	11166	4.0479	0.295266	0.405738	9.2098e-05	21716	10x	tenx_B73	B73	NA	-1.79203	0.77699	0.15	singlet	5	Ground_meristem
CB:Z:GTGTCAACACCGTCTT-pool21	8185	2700	3269	0	4693	3.67145	0.329872	0.399389	0	8185	10x	tenx_B73	B73	NA	2.10337	4.72262	0.0192308	singlet	3	Axillary_meristem
CB:Z:ATGTCGAGTACGGAGT-pool21	141879	45025	53689	0	67061	4.82647	0.317348	0.378414	0	141879	10x	tenx_B73	B73	NA	-0.0848407	1.94191	0.190385	singlet	1	Protoderm
CB:Z:GATCATGCAGTAACGG-pool21	112890	33803	40645	4	55052	4.74077	0.299433	0.360041	3.54327e-05	112890	10x	tenx_B73	B73	NA	-0.202491	1.89531	0.125	singlet	1	Protoderm
CB:Z:GTGCACGTCTAGTCGA-pool21	34552	8927	10608	2	18404	4.26491	0.258364	0.307016	5.78838e-05	34552	10x	tenx_B73	B73	NA	1.65642	0.232555	0.157692	singlet	11	Mesophyll
CB:Z:AGTGCGCGTTCCCAAA-pool21	522259	154543	169687	6	225837	5.3538	0.295913	0.32491	1.14886e-05	522259	10x	tenx_B73	B73	NA	0.127368	2.15852	0.128846	singlet	1	Protoderm
CB:Z:TTACGTTTCACAGGGA-pool21	140618	34250	39356	2	72592	4.86089	0.243568	0.279879	1.42229e-05	140618	10x	tenx_B73	B73	NA	0.683584	0.815803	0.123077	singlet	5	Ground_meristem
CB:Z:CGTTCCAAGAGCTGTG-pool21	31179	7742	8334	0	16864	4.22696	0.248308	0.267295	0	31179	10x	tenx_B73	B73	NA	4.57426	-1.99282	0.178846	singlet	13	Bundle_sheath
CB:Z:AACTTGGAGGAATGGA-pool21	51309	18058	21920	0	25056	4.39891	0.351946	0.427215	0	51309	10x	tenx_B73	B73	NA	-1.19141	5.48444	0.0884615	singlet	9	Vascular_parenchyma_precursor
CB:Z:CGTTCCATCGTAGCGC-pool21	57625	17064	19605	0	29584	4.47106	0.296121	0.340217	0	57625	10x	tenx_B73	B73	NA	0.898377	0.697999	0.159615	singlet	5	Ground_meristem
CB:Z:AACAAAGGTCGATTAC-pool21	364426	91052	94012	4	179658	5.25445	0.24985	0.257973	1.09762e-05	364426	10x	tenx_B73	B73	NA	-0.0841492	2.03454	0.163462	singlet	1	Protoderm
CB:Z:TGGGTGCTCTTAATCC-pool21	27540	6607	7818	4	14408	4.1586	0.239906	0.283878	0.000145243	27540	10x	tenx_B73	B73	NA	-0.805299	2.60933	0.123077	singlet	12	Epidermis
CB:Z:GATTAGCTCTAGCTGA-pool21	14908	3520	4313	0	7482	3.87402	0.236115	0.289308	0	14908	10x	tenx_B73	B73	NA	1.016	0.449521	0.125	singlet	5	Ground_meristem
CB:Z:TTCATTGGTAGATGAT-pool21	242496	65578	64729	2	120569	5.08124	0.270429	0.266928	8.24756e-06	242496	10x	tenx_B73	B73	NA	-0.245268	1.81588	0.134615	singlet	1	Protoderm
CB:Z:CTCCCAAGTGAGGGTT-pool21	127616	38130	46840	2	63116	4.80014	0.298787	0.367039	1.5672e-05	127616	10x	tenx_B73	B73	NA	0.65586	0.835528	0.121154	singlet	5	Ground_meristem
CB:Z:TATGTTCAGGGCGAAG-pool21	189616	46889	47343	4	97048	4.98699	0.247284	0.249678	2.10953e-05	189616	10x	tenx_B73	B73	NA	-0.504066	1.78783	0.176923	singlet	1	Protoderm
CB:Z:CTGTTCGTCCAGTTAG-pool21	157265	43066	44355	4	79352	4.89956	0.273844	0.28204	2.54348e-05	157265	10x	tenx_B73	B73	NA	0.145506	2.18792	0.180769	singlet	1	Protoderm
CB:Z:TACCTCGTCCAGTTAG-pool21	24068	7078	7315	0	13685	4.13624	0.294083	0.303931	0	24068	10x	tenx_B73	B73	NA	2.54862	0.113127	0.130769	singlet	11	Mesophyll
CB:Z:GAGACTTGTGTTTCTT-pool21	156949	44234	52247	4	79299	4.89927	0.281837	0.332892	2.5486e-05	156949	10x	tenx_B73	B73	NA	0.381611	1.58604	0.153846	singlet	1	Protoderm
CB:Z:GGCATTAGTAGATTAG-pool21	329364	90967	95245	6	156968	5.19581	0.27619	0.289179	1.82169e-05	329364	10x	tenx_B73	B73	NA	0.00816513	2.16593	0.194231	singlet	1	Protoderm
CB:Z:GTTATGGGTATTTGCG-pool21	58338	16524	21704	0	29522	4.47015	0.283246	0.372039	0	58338	10x	tenx_B73	B73	NA	0.701378	-0.211429	0.167308	singlet	5	Ground_meristem
CB:Z:TTGCAGAGTAACGGAC-pool21	131583	38403	43286	2	65865	4.81865	0.291854	0.328963	1.51995e-05	131583	10x	tenx_B73	B73	NA	0.158435	1.79718	0.161538	singlet	1	Protoderm
CB:Z:GAATCTGTCAACTTGG-pool21	32192	8450	8250	0	16788	4.225	0.262488	0.256275	0	32192	10x	tenx_B73	B73	NA	-1.24804	2.00103	0.144231	singlet	12	Epidermis
CB:Z:CTCTACGGTTCAGAAA-pool21	52817	17441	20937	0	26039	4.41562	0.330216	0.396406	0	52817	10x	tenx_B73	B73	NA	-2.23712	2.82635	0.101923	singlet	12	Epidermis
CB:Z:AGTTTGGAGTATCTGC-pool21	60887	21195	30055	2	28931	4.46136	0.348104	0.493619	3.28477e-05	60887	10x	tenx_B73	B73	NA	2.55153	0.115817	0.113462	singlet	11	Mesophyll
CB:Z:GCCTACTGTAACGGAC-pool21	82144	28513	35434	0	39499	4.59659	0.34711	0.431364	0	82144	10x	tenx_B73	B73	NA	-0.954083	1.84365	0.101923	singlet	12	Epidermis
CB:Z:TGTAGCACAAGAGCGT-pool21	5836	1693	1736	0	3390	3.5302	0.290096	0.297464	0	5836	10x	tenx_B73	B73	NA	1.48214	4.32605	0.0615385	singlet	3	Axillary_meristem
CB:Z:GGAGAACAGTGGTGTG-pool21	496270	148057	160868	4	217302	5.33706	0.29834	0.324154	8.06013e-06	496270	10x	tenx_B73	B73	NA	0.0108803	2.14407	0.188462	singlet	1	Protoderm
CB:Z:CTCTAGCCAATCACTG-pool21	8848	2086	2375	2	4907	3.69082	0.235759	0.268422	0.00022604	8848	10x	tenx_B73	B73	NA	0.90675	0.372731	0.153846	singlet	5	Ground_meristem
CB:Z:GCTTAAGGTGTTTCTT-pool21	62500	23191	29481	0	29220	4.46568	0.371056	0.471696	0	62500	10x	tenx_B73	B73	NA	2.47855	0.150334	0.0903846	singlet	11	Mesophyll
CB:Z:TCAGCTCTCCCGATTC-pool21	17746	4488	4361	0	9184	3.96303	0.252902	0.245746	0	17746	10x	tenx_B73	B73	NA	-1.37361	5.08851	0.126923	singlet	9	Vascular_parenchyma_precursor
CB:Z:CCCTAGTAGCCATCAT-pool21	67018	22319	31259	4	31492	4.4982	0.33303	0.466427	5.96855e-05	67018	10x	tenx_B73	B73	NA	2.17686	-0.133476	0.0980769	singlet	11	Mesophyll
CB:Z:GCTTAAGGTTCTACCC-pool21	9526	3785	4991	0	5038	3.70226	0.397334	0.523934	0	9526	10x	tenx_B73	B73	NA	3.15561	-0.389567	0.0788462	singlet	11	Mesophyll
CB:Z:GCTTAAGGTTGCAGCC-pool21	2604	984	1362	0	1425	3.15381	0.37788	0.523041	0	2604	10x	tenx_B73	B73	NA	3.0669	-0.415756	0.115385	singlet	11	Mesophyll
CB:Z:GCCCAGAAGGGTCCCT-pool21	25396	7585	9310	0	13349	4.12545	0.298669	0.366593	0	25396	10x	tenx_B73	B73	NA	-1.61048	5.1126	0.0846154	singlet	9	Vascular_parenchyma_precursor
CB:Z:CGTACAAAGCAATAAC-pool21	1209	279	245	0	657	2.81757	0.230769	0.202647	0	1209	10x	tenx_B73	B73	NA	0.548257	2.66836	0.0942308	singlet	1	Protoderm
CB:Z:GGTGCTGTCTGACTTT-pool21	46932	12484	13744	0	24542	4.38991	0.266002	0.292849	0	46932	10x	tenx_B73	B73	NA	4.485	-1.82516	0.136538	singlet	13	Bundle_sheath
CB:Z:GGTTGCGTCTCTGTTA-pool21	94106	21047	24068	10	49019	4.69036	0.223652	0.255754	0.000106263	94106	10x	tenx_B73	B73	NA	0.819949	0.516525	0.173077	singlet	5	Ground_meristem
CB:Z:GTCACCTCAATTCAGC-pool21	80795	22238	26932	4	40529	4.60777	0.27524	0.333337	4.9508e-05	80795	10x	tenx_B73	B73	NA	-1.91247	5.10637	0.132692	singlet	9	Vascular_parenchyma_precursor
CB:Z:AAGGAGCTCGAAGCCC-pool21	106644	29114	33676	4	53666	4.7297	0.273002	0.31578	3.7508e-05	106644	10x	tenx_B73	B73	NA	0.184318	1.14195	0.161538	singlet	1	Protoderm
CB:Z:TGGCCTTTCTATGAGC-pool21	162238	48069	51096	0	81163	4.90936	0.296287	0.314945	0	162238	10x	tenx_B73	B73	NA	0.137455	1.35513	0.140385	singlet	1	Protoderm
CB:Z:TTACTCACAGAGCCAA-pool21	5530	1771	2159	2	3223	3.50826	0.320253	0.390416	0.000361664	5530	10x	tenx_B73	B73	NA	1.9674	4.99799	0.0576923	singlet	3	Axillary_meristem
CB:Z:GAATCTGTCGCCTTAC-pool21	3028	1061	1311	0	1789	3.25261	0.350396	0.432959	0	3028	10x	tenx_B73	B73	NA	2.64969	4.48736	0.0519231	singlet	3	Axillary_meristem
CB:Z:CGGACTGGTTGAATAG-pool21	253098	80764	92982	0	116578	5.06662	0.319102	0.367375	0	253098	10x	tenx_B73	B73	NA	0.161933	2.03075	0.153846	singlet	1	Protoderm
CB:Z:AGCCAGCTCAATTGGC-pool21	394560	136367	161197	4	161533	5.20826	0.345618	0.408549	1.01379e-05	394560	10x	tenx_B73	B73	NA	0.106134	2.28393	0.155769	singlet	1	Protoderm
CB:Z:ACTGTCCCATTTGGCA-pool21	136377	34319	36625	2	71478	4.85417	0.251648	0.268557	1.46652e-05	136377	10x	tenx_B73	B73	NA	-0.403968	1.74624	0.176923	singlet	1	Protoderm
CB:Z:ACAAACCCATGCGACC-pool21	1488	446	482	0	854	2.93146	0.299731	0.323925	0	1488	10x	tenx_B73	B73	NA	-1.84477	5.22733	0.0807692	singlet	5	Ground_meristem
CB:Z:ACTAACGCATGCGACC-pool21	94085	26586	29892	2	46946	4.6716	0.282574	0.317713	2.12574e-05	94085	10x	tenx_B73	B73	NA	0.831514	0.930782	0.157692	singlet	5	Ground_meristem
CB:Z:CCTTAATAGGCAAGCT-pool21	63787	21441	27008	0	31421	4.49722	0.336134	0.423409	0	63787	10x	tenx_B73	B73	NA	4.11809	-1.51406	0.138462	singlet	11	Mesophyll
CB:Z:ATAGTCGAGGCATGCA-pool21	215893	56742	61159	4	107692	5.03218	0.262825	0.283284	1.85277e-05	215893	10x	tenx_B73	B73	NA	0.0153289	1.90202	0.153846	singlet	1	Protoderm
CB:Z:GCTCCTATCGGATAAA-pool21	360119	106972	115726	0	164923	5.21728	0.297046	0.321355	0	360119	10x	tenx_B73	B73	NA	0.062579	2.18144	0.159615	singlet	1	Protoderm
CB:Z:GGAGGATGTGATTCCA-pool21	11211	2393	2944	0	5961	3.77532	0.213451	0.262599	0	11211	10x	tenx_B73	B73	NA	1.07283	0.401294	0.140385	singlet	5	Ground_meristem
CB:Z:AATGTCGAGCTGCCAC-pool21	202301	71459	79700	0	94181	4.97396	0.353231	0.393967	0	202301	10x	tenx_B73	B73	NA	-0.00336735	2.35123	0.163462	singlet	1	Protoderm
CB:Z:CCCTGATCATTTCACT-pool21	61767	17566	21993	10	31469	4.49788	0.284391	0.356064	0.000161899	61767	10x	tenx_B73	B73	NA	0.833835	0.326798	0.180769	singlet	5	Ground_meristem
CB:Z:CATGTTTCATGGCCTG-pool21	17057	3508	4301	8	9237	3.96553	0.205663	0.252155	0.000469016	17057	10x	tenx_B73	B73	NA	0.853961	0.378211	0.153846	singlet	5	Ground_meristem
CB:Z:GTGATCAGTGCTTACA-pool21	16974	4315	5410	0	8924	3.95056	0.254212	0.318723	0	16974	10x	tenx_B73	B73	NA	2.09131	-0.00777191	0.15	singlet	11	Mesophyll
CB:Z:TGGCGCAGTGGGTAGT-pool21	1126	394	497	0	691	2.83948	0.349911	0.441385	0	1126	10x	tenx_B73	B73	NA	-1.2462	5.36269	0.0923077	singlet	9	Vascular_parenchyma_precursor
CB:Z:TGGCGCAGTTAGTAGA-pool21	52851	21811	28764	0	24370	4.38686	0.412689	0.544247	0	52851	10x	tenx_B73	B73	NA	-0.980359	5.27001	0.0980769	singlet	9	Vascular_parenchyma_precursor
CB:Z:CTAGCGGAGATACCAA-pool21	218558	58495	59431	2	105658	5.0239	0.267641	0.271923	9.15089e-06	218558	10x	tenx_B73	B73	NA	0.0689386	1.99006	0.159615	singlet	1	Protoderm
CB:Z:CCCGTTAGTCACTCTC-pool21	20970	6394	8119	0	10750	4.03141	0.304912	0.387172	0	20970	10x	tenx_B73	B73	NA	4.26913	-1.95407	0.117308	singlet	13	Bundle_sheath
CB:Z:ATCCTCGCACTGATAC-pool21	45338	13285	17072	6	22812	4.35816	0.293021	0.376549	0.000132339	45338	10x	tenx_B73	B73	NA	1.15934	0.122558	0.109615	singlet	5	Ground_meristem
CB:Z:AACCTTTAGCAAGGTC-pool21	1118	377	453	0	705	2.84819	0.337209	0.405188	0	1118	10x	tenx_B73	B73	NA	-2.63417	-3.50223	0.182692	singlet	1	Protoderm
CB:Z:TGCTTTAAGCTACGTT-pool21	35441	11899	15720	0	17536	4.24393	0.335741	0.443554	0	35441	10x	tenx_B73	B73	NA	2.07189	-0.694998	0.0942308	singlet	11	Mesophyll
CB:Z:TTACGGAGTTCTTTCA-pool21	108390	27858	29934	0	55595	4.74504	0.257016	0.276169	0	108390	10x	tenx_B73	B73	NA	0.163516	2.41082	0.163462	singlet	1	Protoderm
CB:Z:TTGCCCAGTGTAGGAC-pool21	37586	8724	9695	2	19998	4.30099	0.232108	0.257942	5.32113e-05	37586	10x	tenx_B73	B73	NA	0.845051	0.727969	0.134615	singlet	5	Ground_meristem
CB:Z:TAGTCCCCAATTCTCT-pool21	31318	6577	7566	2	16734	4.2236	0.210007	0.241586	6.3861e-05	31318	10x	tenx_B73	B73	NA	0.931006	0.558916	0.194231	singlet	5	Ground_meristem
CB:Z:CAGGGCTCACAAACGG-pool21	35906	11239	14766	4	18136	4.25854	0.313012	0.41124	0.000111402	35906	10x	tenx_B73	B73	NA	2.67292	-0.0829375	0.134615	singlet	11	Mesophyll
CB:Z:TTTGGCCTCTTACCTA-pool21	97015	30218	38389	4	47080	4.67284	0.311478	0.395702	4.12307e-05	97015	10x	tenx_B73	B73	NA	-1.08562	2.59434	0.192308	singlet	1	Protoderm
CB:Z:AACTGTGTCGTGTGCG-pool21	38471	12385	15508	0	19583	4.29188	0.321931	0.403109	0	38471	10x	tenx_B73	B73	NA	1.72262	0.208947	0.194231	singlet	11	Mesophyll
CB:Z:ATCCTGCTCTCCCTTT-pool21	145827	51649	67671	4	64862	4.81199	0.35418	0.46405	2.74298e-05	145827	10x	tenx_B73	B73	NA	-0.0954229	2.71081	0.171154	singlet	1	Protoderm
CB:Z:GAAATGATCAGGATCT-pool21	14178	4683	6428	0	7269	3.86147	0.3303	0.453378	0	14178	10x	tenx_B73	B73	NA	2.44073	-0.516532	0.134615	singlet	11	Mesophyll
CB:Z:CTCCCAAGTTAGAGAT-pool21	141714	42099	49860	2	69011	4.83892	0.29707	0.351835	1.41129e-05	141714	10x	tenx_B73	B73	NA	0.134826	1.79861	0.180769	singlet	1	Protoderm
CB:Z:AAACGAAGTGCCCAGT-pool21	48950	12320	11237	0	26676	4.42612	0.251685	0.229561	0	48950	10x	tenx_B73	B73	NA	2.21168	0.264984	0.157692	singlet	11	Mesophyll
CB:Z:GCTCGAGCAGACCTGC-pool21	8110	2984	4076	0	4261	3.62951	0.367941	0.502589	0	8110	10x	tenx_B73	B73	NA	-1.50838	5.6077	0.115385	singlet	9	Vascular_parenchyma_precursor
CB:Z:GCTCGAGCAGCCACGT-pool21	24789	8212	11161	0	12415	4.09395	0.331276	0.45024	0	24789	10x	tenx_B73	B73	NA	-1.53111	5.76055	0.0596154	singlet	9	Vascular_parenchyma_precursor
CB:Z:CCCTAACAGCTCGGCT-pool21	3230	950	1096	0	1751	3.24329	0.294118	0.339319	0	3230	10x	tenx_B73	B73	NA	-1.5798	3.17939	0.0538462	singlet	10	Xylem
CB:Z:CCCTAACAGGATATCA-pool21	16537	4385	5047	0	8718	3.94042	0.265163	0.305194	0	16537	10x	tenx_B73	B73	NA	0.96484	0.517952	0.194231	singlet	5	Ground_meristem
CB:Z:GTGGCGTGTTGGGAAC-pool21	1458	439	530	0	841	2.9248	0.301097	0.363512	0	1458	10x	tenx_B73	B73	NA	2.286	5.32671	0.0557692	singlet	3	Axillary_meristem
CB:Z:CTTTGCGAGTTGACAA-pool21	18217	4832	6227	2	9537	3.97941	0.265247	0.341824	0.000109788	18217	10x	tenx_B73	B73	NA	0.979672	0.402117	0.180769	singlet	5	Ground_meristem
CB:Z:TAATCGGCAAATGTCC-pool21	153211	45958	54017	4	74513	4.87223	0.299965	0.352566	2.61078e-05	153211	10x	tenx_B73	B73	NA	0.114584	1.66406	0.125	singlet	1	Protoderm
CB:Z:ACCGGGTGTCAGAAGC-pool21	144147	45408	58919	0	68592	4.83627	0.315012	0.408742	0	144147	10x	tenx_B73	B73	NA	0.541873	1.09791	0.140385	singlet	1	Protoderm
CB:Z:TTAGCTTCAACGTCGC-pool21	45848	10639	14077	0	23626	4.37339	0.232049	0.307036	0	45848	10x	tenx_B73	B73	NA	4.4533	-0.631761	0.0961538	singlet	13	Bundle_sheath
CB:Z:CCACAGGCATGGGTGA-pool21	11125	2455	2891	0	5991	3.7775	0.220674	0.259865	0	11125	10x	tenx_B73	B73	NA	0.967475	-0.0116933	0.0923077	singlet	5	Ground_meristem
CB:Z:TAGACTGCAATGCATC-pool21	30047	8313	11405	2	15784	4.19822	0.276667	0.379572	6.65624e-05	30047	10x	tenx_B73	B73	NA	2.90563	-0.149579	0.113462	singlet	11	Mesophyll
CB:Z:CAACGTATCTGTCGGG-pool21	255378	69302	77669	6	123863	5.09294	0.27137	0.304133	2.34946e-05	255378	10x	tenx_B73	B73	NA	0.121229	2.00081	0.159615	singlet	1	Protoderm
CB:Z:CACCTTGGTTTAGAAG-pool21	33930	7613	8661	0	18632	4.27026	0.224374	0.255261	0	33930	10x	tenx_B73	B73	NA	1.70731	0.17985	0.175	singlet	11	Mesophyll
CB:Z:ACCGGGTTCCTGTAGA-pool21	173366	58598	64664	4	83006	4.91911	0.338002	0.372991	2.30726e-05	173366	10x	tenx_B73	B73	NA	0.101143	1.89166	0.161538	singlet	1	Protoderm
CB:Z:AGGCGTCGTATCAGCT-pool21	148802	39902	47981	4	73610	4.86694	0.268155	0.322449	2.68814e-05	148802	10x	tenx_B73	B73	NA	-0.418643	2.6807	0.132692	singlet	1	Protoderm
CB:Z:CGCTGGATCCGGCGAT-pool21	281890	72338	75296	0	140918	5.14897	0.256618	0.267111	0	281890	10x	tenx_B73	B73	NA	0.0727662	2.28795	0.146154	singlet	1	Protoderm
CB:Z:CTGCGTTTCGATGCAT-pool21	100967	21998	24692	0	54269	4.73455	0.217873	0.244555	0	100967	10x	tenx_B73	B73	NA	0.761002	0.731381	0.171154	singlet	5	Ground_meristem
CB:Z:CAACGTACAGTTAAAG-pool21	196543	68124	85052	4	87098	4.94001	0.346611	0.43274	2.03518e-05	196543	10x	tenx_B73	B73	NA	0.0467017	2.29719	0.188462	singlet	1	Protoderm
CB:Z:GGGCCATAGTCATCTG-pool21	223195	81688	108576	6	92325	4.96532	0.365994	0.486463	2.68823e-05	223195	10x	tenx_B73	B73	NA	0.0539356	2.20356	0.165385	singlet	1	Protoderm
CB:Z:GGGTTATAGCTTTCCC-pool21	57350	12358	14777	2	30436	4.48339	0.215484	0.257663	3.48736e-05	57350	10x	tenx_B73	B73	NA	4.13096	-1.94178	0.0980769	singlet	13	Bundle_sheath
CB:Z:TGAGTCACAAGCGGTA-pool21	162701	53995	72144	0	72319	4.85925	0.331866	0.443415	0	162701	10x	tenx_B73	B73	NA	0.287954	1.61264	0.165385	singlet	1	Protoderm
CB:Z:AACGGGAAGTGGTGTG-pool21	5363	1901	2415	0	2976	3.47363	0.354466	0.450308	0	5363	10x	tenx_B73	B73	NA	2.27316	-0.785215	0.0826923	singlet	4	Ground_meristem
CB:Z:AACTGGTAGTGGTGTG-pool21	71847	21360	26935	4	35807	4.55397	0.297298	0.374894	5.56739e-05	71847	10x	tenx_B73	B73	NA	0.815805	0.510935	0.153846	singlet	5	Ground_meristem
CB:Z:GTGTCCTGTTACGGAG-pool21	136575	51127	68186	6	60020	4.7783	0.374351	0.499257	4.39319e-05	136575	10x	tenx_B73	B73	NA	-0.193977	2.44229	0.182692	singlet	1	Protoderm
CB:Z:TTCGGTCCAGTTGGAG-pool21	36557	11738	15996	0	18271	4.26176	0.321088	0.437563	0	36557	10x	tenx_B73	B73	NA	2.95682	-0.111618	0.146154	singlet	11	Mesophyll
CB:Z:GTCGTAAAGTCGAGCA-pool21	269172	68252	70544	0	133707	5.12615	0.253563	0.262078	0	269172	10x	tenx_B73	B73	NA	0.0286372	1.93722	0.138462	singlet	1	Protoderm
CB:Z:TGCACCTCATGGCCGT-pool21	70566	23228	27150	0	34831	4.54197	0.329167	0.384746	0	70566	10x	tenx_B73	B73	NA	2.31571	0.146524	0.146154	singlet	11	Mesophyll
CB:Z:GCGCCAAGTAGCAGGT-pool21	76508	24299	31432	2	37053	4.56882	0.317601	0.410833	2.61411e-05	76508	10x	tenx_B73	B73	NA	0.663023	0.762094	0.175	singlet	1	Protoderm
CB:Z:TGGGTGCCAGGCAAGT-pool21	42243	14630	19429	0	20393	4.30948	0.34633	0.459934	0	42243	10x	tenx_B73	B73	NA	-1.07845	5.35777	0.138462	singlet	9	Vascular_parenchyma_precursor
CB:Z:TGCTATTGTCTGCGCA-pool21	10901	3294	4264	0	5600	3.74819	0.302174	0.391157	0	10901	10x	tenx_B73	B73	NA	-1.64015	5.44841	0.0730769	singlet	11	Mesophyll
CB:Z:ACTACCCCAAACGACG-pool21	57126	17056	20338	0	29381	4.46807	0.298568	0.35602	0	57126	10x	tenx_B73	B73	NA	4.50282	-1.98834	0.167308	singlet	13	Bundle_sheath
CB:Z:TAGCCCTCATAGCCAT-pool21	192493	57747	60036	6	92264	4.96503	0.299995	0.311887	3.117e-05	192493	10x	tenx_B73	B73	NA	0.247344	1.67191	0.167308	singlet	1	Protoderm
CB:Z:ACGTTAGTCAGGCGCT-pool21	36375	10387	13580	4	18645	4.27056	0.285553	0.373333	0.000109966	36375	10x	tenx_B73	B73	NA	4.15081	-0.808722	0.128846	singlet	5	Ground_meristem
CB:Z:TACGCCTTCTTGTCGC-pool21	49533	13512	16542	0	25264	4.4025	0.272788	0.333959	0	49533	10x	tenx_B73	B73	NA	1.85157	0.204669	0.144231	singlet	11	Mesophyll
CB:Z:TGAGTCAAGGCAGTAC-pool21	3841	1537	2038	0	2215	3.34537	0.400156	0.530591	0	3841	10x	tenx_B73	B73	NA	2.5532	1.61994	0.0865385	singlet	9	Vascular_parenchyma_precursor
CB:Z:GTAGACTCAATGTGCT-pool21	37821	15938	22626	0	17477	4.24247	0.421406	0.598239	0	37821	10x	tenx_B73	B73	NA	-2.08919	5.10909	0.134615	singlet	9	Vascular_parenchyma_precursor
CB:Z:AACGAGGTCTTCACTA-pool21	8777	3712	5505	0	4592	3.662	0.422924	0.627207	0	8777	10x	tenx_B73	B73	NA	-1.45263	-1.4676	0.134615	singlet	4	Ground_meristem
CB:Z:CTACAGATCTATTGTC-pool21	4143	1066	1093	0	2642	3.42193	0.257301	0.263818	0	4143	10x	tenx_B73	B73	NA	0.822165	-1.5333	0.128846	singlet	5	Ground_meristem
CB:Z:GGATAGGGTATGTTCG-pool21	6504	2128	2470	2	3809	3.58081	0.327183	0.379766	0.000307503	6504	10x	tenx_B73	B73	NA	2.68118	4.43006	0.121154	singlet	3	Axillary_meristem
CB:Z:GGATGAGAGGAATGGA-pool21	61484	15450	16795	2	31329	4.49595	0.251285	0.27316	3.25288e-05	61484	10x	tenx_B73	B73	NA	1.10597	0.370711	0.132692	singlet	5	Ground_meristem
CB:Z:GGTTGCGAGGATTGAT-pool21	1357	321	326	0	781	2.89265	0.236551	0.240236	0	1357	10x	tenx_B73	B73	NA	3.13571	-1.51462	0.0980769	singlet	11	Mesophyll
CB:Z:CCAATGAAGTAGGTCG-pool21	72884	22643	29171	2	35790	4.55376	0.310672	0.400239	2.74409e-05	72884	10x	tenx_B73	B73	NA	0.783234	0.747758	0.128846	singlet	5	Ground_meristem
CB:Z:CTTTGCGGTCGATAGG-pool21	8752	2320	2364	0	4727	3.67459	0.265082	0.27011	0	8752	10x	tenx_B73	B73	NA	-1.63396	5.46717	0.0846154	singlet	6	Vascular_parenchyma
CB:Z:CTGTTCGTCGGTTGTA-pool21	206673	73259	94763	0	89742	4.953	0.354468	0.458517	0	206673	10x	tenx_B73	B73	NA	-0.169214	2.47214	0.153846	singlet	1	Protoderm
CB:Z:TACCTCGTCGGTTGTA-pool21	26284	9681	12702	0	13802	4.13994	0.368323	0.48326	0	26284	10x	tenx_B73	B73	NA	3.35424	1.61759	0.0769231	singlet	11	Mesophyll
CB:Z:TCACCACGTATCTCAG-pool21	6594	2915	4026	0	3490	3.54283	0.442069	0.610555	0	6594	10x	tenx_B73	B73	NA	-2.15335	-1.95541	0.169231	singlet	4	Ground_meristem
CB:Z:CTTGAAGAGAGCCACA-pool21	6390	1483	1763	0	3575	3.55328	0.232081	0.2759	0	6390	10x	tenx_B73	B73	NA	1.03544	0.291259	0.184615	singlet	5	Ground_meristem
CB:Z:GGTGCTGCATCCCTCA-pool21	56494	16275	17588	0	30013	4.47731	0.288084	0.311325	0	56494	10x	tenx_B73	B73	NA	-0.237455	1.80492	0.167308	singlet	1	Protoderm
CB:Z:TTTGAGGTCCAATAGC-pool21	11857	3391	4070	2	6247	3.79567	0.285991	0.343257	0.000168677	11857	10x	tenx_B73	B73	NA	3.21397	1.86007	0.0711538	singlet	6	Vascular_parenchyma
CB:Z:ATCGAGTCAATGACTC-pool21	35175	9044	11721	2	18070	4.25696	0.257114	0.33322	5.68586e-05	35175	10x	tenx_B73	B73	NA	0.811079	0.229984	0.194231	singlet	5	Ground_meristem
CB:Z:GGTCATAAGTCGAAAT-pool21	24091	8538	11539	0	12182	4.08572	0.354406	0.478976	0	24091	10x	tenx_B73	B73	NA	-1.65535	5.33843	0.0980769	singlet	9	Vascular_parenchyma_precursor
CB:Z:TCGCAGGCATAGTCCA-pool21	51171	18164	24724	2	24562	4.39026	0.354967	0.483164	3.90846e-05	51171	10x	tenx_B73	B73	NA	-1.90946	5.14985	0.134615	singlet	9	Vascular_parenchyma_precursor
CB:Z:TCAGTCCTCATTCTTG-pool21	61573	20489	29320	4	29504	4.46988	0.332759	0.476183	6.49635e-05	61573	10x	tenx_B73	B73	NA	1.3714	0.362736	0.192308	singlet	5	Ground_meristem
CB:Z:TCACCACCAGTAGTCT-pool21	26740	6328	8435	2	14022	4.14681	0.236649	0.315445	7.47943e-05	26740	10x	tenx_B73	B73	NA	1.9054	-0.0479495	0.136538	singlet	11	Mesophyll
CB:Z:ATGCATGAGCTCCGGT-pool21	233303	67377	71228	6	112180	5.04992	0.288796	0.305303	2.57176e-05	233303	10x	tenx_B73	B73	NA	0.263878	2.31892	0.192308	singlet	1	Protoderm
CB:Z:CCGTGAGCAGAACAGC-pool21	1060	215	233	0	624	2.79518	0.20283	0.219811	0	1060	10x	tenx_B73	B73	NA	-3.65091	3.38655	0.0865385	singlet	8	Phloem
CB:Z:ACAAGCTGTCAATCCA-pool21	376865	100388	97876	2	179386	5.25379	0.266377	0.259711	5.30694e-06	376865	10x	tenx_B73	B73	NA	-0.0205374	2.39645	0.190385	singlet	1	Protoderm
CB:Z:ATGTTTCGTAGGGTTG-pool21	1410	480	550	0	835	2.92169	0.340426	0.390071	0	1410	10x	tenx_B73	B73	NA	-2.71188	-4.21816	0.0576923	singlet	3	Axillary_meristem
CB:Z:GGAGGATTCACCGCGA-pool21	14276	3496	4325	0	7607	3.88121	0.244887	0.302956	0	14276	10x	tenx_B73	B73	NA	-1.63416	5.26483	0.101923	singlet	9	Vascular_parenchyma_precursor
CB:Z:GCCCAGATCAATTGGC-pool21	19348	6831	8287	0	10919	4.03818	0.35306	0.428313	0	19348	10x	tenx_B73	B73	NA	3.08419	-0.297614	0.148077	singlet	11	Mesophyll
CB:Z:CTACTTAAGCTAGTTC-pool21	61592	17717	20428	0	31511	4.49846	0.287651	0.331666	0	61592	10x	tenx_B73	B73	NA	4.88101	-1.73557	0.159615	singlet	13	Bundle_sheath
CB:Z:GTAGTACAGGAGTACC-pool21	35547	12227	14689	0	18632	4.27026	0.343967	0.413228	0	35547	10x	tenx_B73	B73	NA	-1.90528	1.14835	0.155769	singlet	12	Epidermis
CB:Z:CTTGCTGGTCGCTAGC-pool21	5783	1721	1884	0	3361	3.52647	0.297596	0.325782	0	5783	10x	tenx_B73	B73	NA	1.90369	-2.48078	0.0461538	singlet	2	Bundle_sheath
CB:Z:CTTGCTGGTTCAGTTG-pool21	235067	66066	73135	8	114104	5.0573	0.281052	0.311124	3.40329e-05	235067	10x	tenx_B73	B73	NA	0.0505946	1.89265	0.165385	singlet	1	Protoderm
CB:Z:GAATCTGGTGCGCATC-pool21	37561	9579	10607	0	20501	4.31178	0.255025	0.282394	0	37561	10x	tenx_B73	B73	NA	4.4479	-1.96427	0.167308	singlet	13	Bundle_sheath
CB:Z:ACAGCGCAGTAGTGTA-pool21	33405	9288	10673	0	18016	4.25566	0.278042	0.319503	0	33405	10x	tenx_B73	B73	NA	0.773014	0.42232	0.184615	singlet	5	Ground_meristem
CB:Z:CATTCCGCATGGTTTG-pool21	20447	6777	9438	4	10379	4.01616	0.331442	0.461584	0.000195628	20447	10x	tenx_B73	B73	NA	4.91316	-1.67826	0.138462	singlet	13	Bundle_sheath
CB:Z:ACTACGATCTGGTACA-pool21	54992	20969	28113	0	25594	4.40814	0.38131	0.51122	0	54992	10x	tenx_B73	B73	NA	2.68202	0.0781845	0.186538	singlet	11	Mesophyll
CB:Z:TGATCAGTCTGGTACA-pool21	16764	6726	9395	0	8651	3.93707	0.401217	0.560427	0	16764	10x	tenx_B73	B73	NA	3.03302	-0.353996	0.0826923	singlet	11	Mesophyll
CB:Z:ACTAACGTCCTTTGCG-pool21	50318	17131	22083	2	27268	4.43565	0.340455	0.438869	3.97472e-05	50318	10x	tenx_B73	B73	NA	2.13597	5.78075	0.15	singlet	3	Axillary_meristem
CB:Z:ACAGAAAAGCAACGGT-pool21	15530	4195	5514	2	8073	3.90703	0.270122	0.355055	0.000128783	15530	10x	tenx_B73	B73	NA	1.55955	0.0793662	0.161538	singlet	11	Mesophyll
CB:Z:GGGCCATGTAGCGAGT-pool21	56468	18231	24631	0	27658	4.44182	0.322855	0.436194	0	56468	10x	tenx_B73	B73	NA	1.88794	0.18776	0.142308	singlet	11	Mesophyll
CB:Z:CAGTGTAAGCAGAATT-pool21	54995	15242	17331	0	28573	4.45596	0.277152	0.315138	0	54995	10x	tenx_B73	B73	NA	-1.91468	5.08986	0.125	singlet	9	Vascular_parenchyma_precursor
CB:Z:CGCTAGGAGACTAATG-pool21	27014	6122	6501	2	14648	4.16578	0.226623	0.240653	7.40357e-05	27014	10x	tenx_B73	B73	NA	0.769692	0.521466	0.180769	singlet	5	Ground_meristem
CB:Z:GTCACGGGTTTCACCC-pool21	101058	34485	45759	0	47433	4.67608	0.34124	0.452799	0	101058	10x	tenx_B73	B73	NA	-0.195889	2.52768	0.107692	singlet	1	Protoderm
CB:Z:GACCTTCAGTCTGGGA-pool21	18837	4208	5327	0	10043	4.00186	0.22339	0.282795	0	18837	10x	tenx_B73	B73	NA	0.995774	0.411954	0.178846	singlet	5	Ground_meristem
CB:Z:GAATCTGCAGAGATGC-pool21	345316	104407	123249	24	157384	5.19696	0.302352	0.356917	6.95016e-05	345316	10x	tenx_B73	B73	NA	-0.0528349	1.93391	0.117308	singlet	1	Protoderm
CB:Z:GAGCATTGTTTGTCTT-pool21	54401	18965	26960	0	25534	4.40712	0.348615	0.495579	0	54401	10x	tenx_B73	B73	NA	2.73609	0.128275	0.113462	singlet	11	Mesophyll
CB:Z:GGTGTCGCAATCATCG-pool21	57577	15836	20471	4	29112	4.46407	0.27504	0.355541	6.94722e-05	57577	10x	tenx_B73	B73	NA	0.982073	0.393581	0.15	singlet	5	Ground_meristem
CB:Z:AGCCAGCCAGTAACGG-pool21	13248	4592	5947	0	6725	3.82769	0.346618	0.448898	0	13248	10x	tenx_B73	B73	NA	4.91958	-2.02152	0.126923	singlet	13	Bundle_sheath
CB:Z:AGCCCGAGTTCTACCC-pool21	1330	450	528	0	737	2.86747	0.338346	0.396992	0	1330	10x	tenx_B73	B73	NA	4.23326	-1.01789	0.0884615	singlet	13	Bundle_sheath
CB:Z:GGAGGATAGTTGCCGC-pool21	19587	5400	6878	6	10272	4.01166	0.275693	0.351151	0.000306326	19587	10x	tenx_B73	B73	NA	1.09166	-0.341455	0.0846154	singlet	5	Ground_meristem
CB:Z:ATTGTCTAGTGCTGAG-pool21	54325	15590	19418	2	27497	4.43929	0.286977	0.357441	3.68155e-05	54325	10x	tenx_B73	B73	NA	2.39169	0.196209	0.113462	singlet	11	Mesophyll
CB:Z:ACAGCGCTCCTGGAAT-pool21	26957	5941	7275	2	14493	4.16116	0.220388	0.269874	7.41922e-05	26957	10x	tenx_B73	B73	NA	0.957643	0.33509	0.126923	singlet	5	Ground_meristem
CB:Z:AAGGAGCCATCGACGC-pool21	29940	8037	9089	0	16237	4.21051	0.268437	0.303574	0	29940	10x	tenx_B73	B73	NA	2.09202	-0.435511	0.117308	singlet	11	Mesophyll
CB:Z:TAGTCCCTCTCTTCCT-pool21	54389	22556	30661	0	25102	4.39971	0.414716	0.563735	0	54389	10x	tenx_B73	B73	NA	-1.85108	5.16321	0.161538	singlet	9	Vascular_parenchyma_precursor
CB:Z:CCTGGGAGTCTGTCCT-pool21	78122	23141	26808	2	39053	4.59165	0.296216	0.343156	2.5601e-05	78122	10x	tenx_B73	B73	NA	0.171122	1.67538	0.144231	singlet	1	Protoderm
CB:Z:CCCTGATGTGGTGGTA-pool21	4546	1560	1845	0	2642	3.42193	0.343159	0.405851	0	4546	10x	tenx_B73	B73	NA	1.96312	4.69113	0.0288462	singlet	3	Axillary_meristem
CB:Z:ACTATTCCAATGCATC-pool21	1052	224	226	0	592	2.77232	0.212928	0.214829	0	1052	10x	tenx_B73	B73	NA	-0.201063	2.82881	0.0826923	singlet	1	Protoderm
CB:Z:ATTACTCCACAACGGA-pool21	70675	17709	20814	4	37047	4.56875	0.25057	0.294503	5.65971e-05	70675	10x	tenx_B73	B73	NA	0.686385	0.672709	0.130769	singlet	5	Ground_meristem
CB:Z:GACTAACGTCGATAGG-pool21	77588	28376	38887	0	35593	4.55136	0.365727	0.501199	0	77588	10x	tenx_B73	B73	NA	2.23885	-0.0779814	0.0942308	singlet	11	Mesophyll
CB:Z:AGCCGCAGTAACGGAC-pool21	64256	23077	30451	0	30899	4.48994	0.359142	0.473901	0	64256	10x	tenx_B73	B73	NA	2.36674	0.0169595	0.111538	singlet	11	Mesophyll
CB:Z:TCAAGGTAGCAACTGG-pool21	1583	649	819	0	855	2.93197	0.409981	0.517372	0	1583	10x	tenx_B73	B73	NA	-0.817871	-3.48072	0.0903846	singlet	4	Ground_meristem
CB:Z:TTACCGCAGAATATCG-pool21	718664	234150	264461	4	290713	5.46346	0.325813	0.36799	5.56588e-06	718664	10x	tenx_B73	B73	NA	0.112541	2.16804	0.119231	singlet	1	Protoderm
CB:Z:CACGTTCTCGAACACT-pool21	3180	889	1100	0	1658	3.21958	0.27956	0.345912	0	3180	10x	tenx_B73	B73	NA	4.46674	-0.401412	0.113462	singlet	13	Bundle_sheath
CB:Z:GAAGAGCCAATTCTCT-pool21	72504	18519	15635	0	39431	4.59584	0.25542	0.215643	0	72504	10x	tenx_B73	B73	NA	2.30153	0.155892	0.125	singlet	11	Mesophyll
CB:Z:AACCGATTCTAGCAAC-pool21	47473	15205	20644	0	23364	4.36855	0.320287	0.434858	0	47473	10x	tenx_B73	B73	NA	1.75771	0.182773	0.167308	singlet	11	Mesophyll
CB:Z:ACCAAACGTACGGATG-pool21	35478	13015	16946	2	19571	4.29161	0.366847	0.477648	5.6373e-05	35478	10x	tenx_B73	B73	NA	2.18563	5.78797	0.0769231	singlet	3	Axillary_meristem
CB:Z:AAATGCCAGTTGTCCA-pool21	45993	16859	21334	0	22600	4.35411	0.366556	0.463853	0	45993	10x	tenx_B73	B73	NA	-2.19393	2.7929	0.0788462	singlet	12	Epidermis
CB:Z:TTGTTGTGTGTGCTTA-pool21	19172	3950	5167	2	10189	4.00813	0.20603	0.269508	0.000104319	19172	10x	tenx_B73	B73	NA	0.988987	0.331711	0.171154	singlet	5	Ground_meristem
CB:Z:GTAGGAGAGGTTCGAG-pool21	325667	100072	113221	4	149280	5.174	0.307283	0.347659	1.22825e-05	325667	10x	tenx_B73	B73	NA	-0.00271981	1.91297	0.144231	singlet	1	Protoderm
CB:Z:CAACGGCGTACGCAAG-pool21	67431	22048	25874	4	33097	4.51979	0.326971	0.383711	5.93199e-05	67431	10x	tenx_B73	B73	NA	2.0756	0.00303265	0.134615	singlet	11	Mesophyll
CB:Z:GAAACAAAGCCGCTGT-pool21	96980	34595	45390	0	44984	4.65306	0.356723	0.468035	0	96980	10x	tenx_B73	B73	NA	-0.329452	2.76012	0.140385	singlet	1	Protoderm
CB:Z:CAGTGTAGTCCAAGTT-pool21	35499	10020	13950	0	17877	4.25229	0.282261	0.392969	0	35499	10x	tenx_B73	B73	NA	1.16134	0.383899	0.146154	singlet	5	Ground_meristem
CB:Z:ATTACTCAGACCATAA-pool21	63169	12948	13685	0	33557	4.52578	0.204974	0.216641	0	63169	10x	tenx_B73	B73	NA	0.0467189	1.76081	0.167308	singlet	1	Protoderm
CB:Z:TACGCCTTCGCGTGAC-pool21	22052	6835	9421	0	11895	4.07536	0.309949	0.427217	0	22052	10x	tenx_B73	B73	NA	-2.16451	3.28939	0.103846	singlet	11	Mesophyll
CB:Z:TGATCAGCAAGATGCG-pool21	34728	10544	14248	2	18268	4.26169	0.303617	0.410274	5.75904e-05	34728	10x	tenx_B73	B73	NA	-2.14257	3.30952	0.0942308	singlet	11	Mesophyll
CB:Z:TTACGTTTCTGTAGAC-pool21	19890	6471	8881	0	10690	4.02898	0.325339	0.446506	0	19890	10x	tenx_B73	B73	NA	-2.18924	3.32857	0.0634615	singlet	9	Vascular_parenchyma_precursor
CB:Z:GCCTAGGGTCTCTAAG-pool21	44098	12986	16742	0	21264	4.32764	0.29448	0.379654	0	44098	10x	tenx_B73	B73	NA	4.73635	-0.807625	0.1	singlet	13	Bundle_sheath
CB:Z:GCCTAGGTCTCTGCGT-pool21	5869	1340	1729	0	3223	3.50826	0.228318	0.294599	0	5869	10x	tenx_B73	B73	NA	4.25404	-0.721266	0.111538	singlet	13	Bundle_sheath
CB:Z:GACTAACGTATCCCTC-pool21	287247	73529	78343	4	141596	5.15105	0.255978	0.272737	1.39253e-05	287247	10x	tenx_B73	B73	NA	-0.451866	1.73403	0.148077	singlet	1	Protoderm
CB:Z:AAGGTTCCAGAAGTGC-pool21	18389	6006	8271	0	9531	3.97914	0.326608	0.44978	0	18389	10x	tenx_B73	B73	NA	3.34866	-0.362301	0.0807692	singlet	11	Mesophyll
CB:Z:CCGTAGGTCTATCTAC-pool21	84460	24641	27618	6	43696	4.64044	0.291748	0.326995	7.10395e-05	84460	10x	tenx_B73	B73	NA	-1.01794	-6.19533	0.136538	singlet	5	Ground_meristem
CB:Z:AACCGATAGAACGCCA-pool21	7899	1954	2198	0	4284	3.63185	0.247373	0.278263	0	7899	10x	tenx_B73	B73	NA	2.61277	0.0619672	0.146154	singlet	11	Mesophyll
CB:Z:AGTCCGGAGAACGCCA-pool21	4416	1086	1252	0	2398	3.37985	0.245924	0.283514	0	4416	10x	tenx_B73	B73	NA	2.60076	0.039969	0.109615	singlet	11	Mesophyll
CB:Z:CGTAAACAGAACGCCA-pool21	5336	1320	1523	0	2899	3.46225	0.247376	0.28542	0	5336	10x	tenx_B73	B73	NA	2.57029	0.0588843	0.0153846	singlet	11	Mesophyll
CB:Z:CTGTATTAGAACGCCA-pool21	6716	1676	1818	0	3629	3.55979	0.249553	0.270697	0	6716	10x	tenx_B73	B73	NA	2.60592	0.0861915	0.0576923	singlet	11	Mesophyll
CB:Z:GCCCGAAAGAACGCCA-pool21	4017	945	1091	0	2202	3.34282	0.23525	0.271596	0	4017	10x	tenx_B73	B73	NA	2.61937	0.106122	0.0519231	singlet	11	Mesophyll
CB:Z:GCTCACTAGAACGCCA-pool21	7646	1886	2112	0	4132	3.61616	0.246665	0.276223	0	7646	10x	tenx_B73	B73	NA	2.58818	0.0437339	0.142308	singlet	11	Mesophyll
CB:Z:TAATCGGAGAACGCCA-pool21	22538	5100	5652	0	11965	4.07791	0.226284	0.250776	0	22538	10x	tenx_B73	B73	NA	2.4826	0.0333608	0.0634615	singlet	11	Mesophyll
CB:Z:TCCAGAAAGAACGCCA-pool21	7122	1773	1924	0	3854	3.58591	0.248947	0.270149	0	7122	10x	tenx_B73	B73	NA	2.6672	-0.0518905	0.111538	singlet	11	Mesophyll
CB:Z:TTGTTCAAGAACGCCA-pool21	3996	998	1119	0	2185	3.33945	0.24975	0.28003	0	3996	10x	tenx_B73	B73	NA	2.56923	-0.00132376	0.138462	singlet	11	Mesophyll
CB:Z:GACCTTCCAGGGTAAC-pool21	14919	3452	4186	2	8003	3.90325	0.231383	0.280582	0.000134057	14919	10x	tenx_B73	B73	NA	4.45955	-1.99541	0.182692	singlet	13	Bundle_sheath
CB:Z:TGGCAATGTAATGTAG-pool21	37893	11450	13805	2	19139	4.28192	0.302167	0.364315	5.27802e-05	37893	10x	tenx_B73	B73	NA	2.3613	0.182979	0.107692	singlet	11	Mesophyll
CB:Z:TGGCAATGTGGGTAGT-pool21	2356	688	794	0	1299	3.11361	0.29202	0.337012	0	2356	10x	tenx_B73	B73	NA	3.09611	-0.22033	0.121154	singlet	11	Mesophyll
CB:Z:GAGAACGGTCCCTTTG-pool21	25719	6946	9665	2	13310	4.12418	0.270073	0.375792	7.77635e-05	25719	10x	tenx_B73	B73	NA	1.04757	0.293638	0.157692	singlet	5	Ground_meristem
CB:Z:TCAAGACCACCTATTT-pool21	110028	37058	49479	0	50455	4.7029	0.336805	0.449695	0	110028	10x	tenx_B73	B73	NA	0.461572	1.75131	0.176923	singlet	11	Mesophyll
CB:Z:GCCTACTAGTGAAACT-pool21	85179	30063	39326	0	39423	4.59575	0.352939	0.461687	0	85179	10x	tenx_B73	B73	NA	-1.19663	5.26581	0.0788462	singlet	9	Vascular_parenchyma_precursor
CB:Z:CTAGCGGCATAGCCAT-pool21	29395	6676	7499	2	15873	4.20066	0.227113	0.255111	6.80388e-05	29395	10x	tenx_B73	B73	NA	0.619515	0.484739	0.138462	singlet	5	Ground_meristem
CB:Z:TCAATTCAGCTGATTC-pool21	70238	16606	21186	4	36328	4.56024	0.236425	0.301632	5.69492e-05	70238	10x	tenx_B73	B73	NA	0.933961	0.491652	0.186538	singlet	5	Ground_meristem
CB:Z:CACCACTAGAAGGGCG-pool21	92879	27281	30418	4	47624	4.67783	0.293726	0.327501	4.30668e-05	92879	10x	tenx_B73	B73	NA	-0.926003	-6.26499	0.128846	singlet	5	Ground_meristem
CB:Z:TACATTCTCCATATCT-pool21	66562	17994	19542	0	35315	4.54796	0.270334	0.293591	0	66562	10x	tenx_B73	B73	NA	0.321471	1.51934	0.178846	singlet	1	Protoderm
CB:Z:TGATTTCTCCGATGCG-pool21	135130	41183	47248	4	66903	4.82545	0.304766	0.349648	2.96011e-05	135130	10x	tenx_B73	B73	NA	-0.332784	2.54194	0.190385	singlet	1	Protoderm
CB:Z:TAGGTGTTCAATTGGC-pool21	50102	12020	12979	2	27506	4.43943	0.239911	0.259052	3.99186e-05	50102	10x	tenx_B73	B73	NA	2.34251	0.168267	0.101923	singlet	11	Mesophyll
CB:Z:CTCATGCAGAGGCGGA-pool21	284018	89732	99290	4	130393	5.11525	0.315938	0.349591	1.40836e-05	284018	10x	tenx_B73	B73	NA	0.0410769	2.29369	0.151923	singlet	1	Protoderm
CB:Z:GCGTTGGGTAACTCCA-pool21	30338	8013	9951	2	15518	4.19084	0.264124	0.328004	6.59239e-05	30338	10x	tenx_B73	B73	NA	-1.75171	2.09418	0.140385	singlet	5	Ground_meristem
CB:Z:ATTGTCTAGACTCTTG-pool21	1872	627	675	0	1106	3.04376	0.334936	0.360577	0	1872	10x	tenx_B73	B73	NA	-2.11339	-0.188722	0.075	singlet	12	Epidermis
CB:Z:TGCATGATCCCAATAG-pool21	52722	17936	23713	0	24688	4.39249	0.3402	0.449774	0	52722	10x	tenx_B73	B73	NA	0.92309	0.825675	0.121154	singlet	5	Ground_meristem
CB:Z:GCGCATGGTAGTGATA-pool21	86831	31791	39263	2	40760	4.61023	0.366125	0.452177	2.30332e-05	86831	10x	tenx_B73	B73	NA	-1.60667	5.26582	0.167308	singlet	9	Vascular_parenchyma_precursor
CB:Z:CTAGGGCCATTGAACC-pool21	13267	2800	3163	4	7186	3.85649	0.21105	0.238411	0.0003015	13267	10x	tenx_B73	B73	NA	-3.41148	2.91763	0.0730769	singlet	10	Xylem
CB:Z:AAACTCGTCGATATGC-pool21	115446	40740	51869	0	55992	4.74813	0.352892	0.449292	0	115446	10x	tenx_B73	B73	NA	0.0761854	2.2629	0.111538	singlet	1	Protoderm
CB:Z:GCATTGAGTGAGGTCA-pool21	97189	34661	43708	0	48132	4.68243	0.356635	0.449722	0	97189	10x	tenx_B73	B73	NA	0.0786429	2.27973	0.136538	singlet	1	Protoderm
CB:Z:CTGTTCGCAGTATCTG-pool21	23249	8253	10571	2	13280	4.1232	0.354983	0.454686	8.60252e-05	23249	10x	tenx_B73	B73	NA	2.16372	5.79956	0.117308	singlet	3	Axillary_meristem
CB:Z:GTTACTTTCTCCAACC-pool21	45851	16886	23663	0	21790	4.33826	0.36828	0.516085	0	45851	10x	tenx_B73	B73	NA	2.71415	-0.0300115	0.121154	singlet	11	Mesophyll
CB:Z:CAGGATTCACAATAAG-pool21	68116	23346	30034	0	32835	4.51634	0.342739	0.440924	0	68116	10x	tenx_B73	B73	NA	1.47082	0.307844	0.173077	singlet	11	Mesophyll
CB:Z:CTAGGGCGTAGGTCTT-pool21	35505	9912	12899	2	18204	4.26017	0.279172	0.363301	5.63301e-05	35505	10x	tenx_B73	B73	NA	0.911621	0.43786	0.142308	singlet	5	Ground_meristem
CB:Z:CACCTTGGTGCCCGAT-pool21	108435	37958	53565	0	48800	4.68842	0.350053	0.493983	0	108435	10x	tenx_B73	B73	NA	0.365629	1.52403	0.128846	singlet	1	Protoderm
CB:Z:GAGGATGTCGTGGCGT-pool21	70848	22730	28848	2	34533	4.53823	0.320828	0.407182	2.82294e-05	70848	10x	tenx_B73	B73	NA	4.54724	-2.06183	0.169231	singlet	13	Bundle_sheath
CB:Z:TTTGGTTCACATTGCA-pool21	134366	48492	64647	8	59111	4.77167	0.360895	0.481126	5.95389e-05	134366	10x	tenx_B73	B73	NA	0.291901	1.85301	0.165385	singlet	1	Protoderm
CB:Z:AATGGAAAGTAGGAAG-pool21	105123	30661	33891	4	53604	4.7292	0.291668	0.322394	3.80507e-05	105123	10x	tenx_B73	B73	NA	0.437215	1.31561	0.117308	singlet	1	Protoderm
CB:Z:TACTGCCGTAAACCCT-pool21	60803	21100	27288	0	28802	4.45942	0.347022	0.448794	0	60803	10x	tenx_B73	B73	NA	1.70229	0.181487	0.173077	singlet	11	Mesophyll
CB:Z:TTGTTGTGTTCCGCGA-pool21	67295	22636	26358	6	32972	4.51815	0.33637	0.391678	8.91597e-05	67295	10x	tenx_B73	B73	NA	4.4974	-0.288799	0.165385	singlet	9	Vascular_parenchyma_precursor
CB:Z:CGTACAATCTATGAGC-pool21	87260	30222	34858	2	42388	4.62724	0.346344	0.399473	2.292e-05	87260	10x	tenx_B73	B73	NA	2.38206	0.151627	0.125	singlet	11	Mesophyll
CB:Z:CTACAGAAGAGGCAGG-pool21	45655	10326	11647	2	24658	4.39196	0.226175	0.255109	4.38068e-05	45655	10x	tenx_B73	B73	NA	2.1871	-0.104178	0.111538	singlet	11	Mesophyll
CB:Z:GCTCGAGAGGATTAAC-pool21	3771	1461	2148	0	2051	3.31197	0.38743	0.56961	0	3771	10x	tenx_B73	B73	NA	-1.5247	-1.69256	0.1	singlet	4	Ground_meristem
CB:Z:TAGGTCAAGTTGCGCC-pool21	75928	19004	16864	4	42726	4.63069	0.25029	0.222105	5.26815e-05	75928	10x	tenx_B73	B73	NA	0.460773	1.74071	0.165385	singlet	1	Protoderm
CB:Z:TCCCACATCATCGCAA-pool21	201530	63339	73002	2	91639	4.96208	0.314291	0.362239	9.92408e-06	201530	10x	tenx_B73	B73	NA	-0.0342285	2.28381	0.192308	singlet	1	Protoderm
CB:Z:TGAGCCGCATCCCTCA-pool21	43844	16595	22330	2	20950	4.32118	0.378501	0.509306	4.56163e-05	43844	10x	tenx_B73	B73	NA	2.09553	0.165728	0.171154	singlet	11	Mesophyll
CB:Z:GGTCATAGTTTGAAGA-pool21	68678	22168	26412	2	34379	4.53629	0.322782	0.384577	2.91214e-05	68678	10x	tenx_B73	B73	NA	-1.97348	5.19403	0.0980769	singlet	9	Vascular_parenchyma_precursor
CB:Z:CTAGGGCCAGATTAAG-pool21	73663	26351	36893	0	33948	4.53081	0.357724	0.500835	0	73663	10x	tenx_B73	B73	NA	2.41106	0.222905	0.171154	singlet	11	Mesophyll
CB:Z:CACCACTCATGATTGC-pool21	26595	7965	11089	0	13600	4.13354	0.299492	0.416958	0	26595	10x	tenx_B73	B73	NA	1.67226	0.150893	0.142308	singlet	11	Mesophyll
CB:Z:AAAGGATAGTCTGCTA-pool21	15717	6128	8816	0	8188	3.91318	0.389896	0.560921	0	15717	10x	tenx_B73	B73	NA	-2.10417	5.2271	0.075	singlet	9	Vascular_parenchyma_precursor
CB:Z:CACCACTTCGTGCTTC-pool21	120317	39093	42649	0	57046	4.75623	0.324917	0.354472	0	120317	10x	tenx_B73	B73	NA	0.393687	1.72899	0.169231	singlet	1	Protoderm
CB:Z:ACCGCAGGTTCCATCC-pool21	56305	17201	22000	4	27954	4.44644	0.305497	0.390729	7.10416e-05	56305	10x	tenx_B73	B73	NA	1.05243	0.0972716	0.140385	singlet	5	Ground_meristem
CB:Z:GCATGATGTAATGTGA-pool21	107990	38205	46969	2	50901	4.70673	0.353783	0.434938	1.85202e-05	107990	10x	tenx_B73	B73	NA	0.0465441	2.14758	0.176923	singlet	1	Protoderm
CB:Z:ACTTTCAAGAAATCTG-pool21	231113	65042	68578	2	112068	5.04948	0.281429	0.296729	8.65378e-06	231113	10x	tenx_B73	B73	NA	0.105556	1.68415	0.151923	singlet	1	Protoderm
CB:Z:AATGCCAAGAGGAAGT-pool21	101809	36098	41239	0	47436	4.67611	0.354566	0.405062	0	101809	10x	tenx_B73	B73	NA	0.257148	2.18338	0.151923	singlet	1	Protoderm
CB:Z:ACTGTCCCACAATAAG-pool21	8066	2529	3074	0	4419	3.64532	0.313538	0.381106	0	8066	10x	tenx_B73	B73	NA	3.36933	-0.254752	0.123077	singlet	11	Mesophyll
CB:Z:AGGCGAATCATTCATC-pool21	39917	12140	14871	0	20464	4.31099	0.304131	0.372548	0	39917	10x	tenx_B73	B73	NA	0.874947	0.582927	0.165385	singlet	5	Ground_meristem
CB:Z:GAGCATTTCCAAACCA-pool21	7393	1759	2243	0	4015	3.60369	0.237928	0.303395	0	7393	10x	tenx_B73	B73	NA	4.49763	-1.95267	0.132692	singlet	13	Bundle_sheath
CB:Z:AGGCCTGCATGGTAAA-pool21	43644	16126	22089	0	23467	4.37046	0.36949	0.506118	0	43644	10x	tenx_B73	B73	NA	2.16379	5.7933	0.0923077	singlet	3	Axillary_meristem
CB:Z:GCGGGTTAGAAATTCG-pool21	73400	23682	32044	4	35550	4.55084	0.322643	0.436567	5.44959e-05	73400	10x	tenx_B73	B73	NA	1.91578	0.113443	0.142308	singlet	11	Mesophyll
CB:Z:GGTGAAGAGGGTAATT-pool21	25475	7352	10301	4	13261	4.12258	0.288597	0.404357	0.000157017	25475	10x	tenx_B73	B73	NA	0.926009	-0.0846843	0.169231	singlet	5	Ground_meristem
CB:Z:GGTGTCGAGGGTAATT-pool21	4586	1499	2126	0	2549	3.40637	0.326864	0.463585	0	4586	10x	tenx_B73	B73	NA	0.95873	-1.56332	0.0692308	singlet	7	Ground_meristem
CB:Z:GGTGAAGCACGGCCAT-pool21	170677	58059	74601	2	76711	4.88486	0.340169	0.437089	1.1718e-05	170677	10x	tenx_B73	B73	NA	-0.112838	2.80202	0.0942308	singlet	1	Protoderm
CB:Z:TTGCCCATCTGGAAGG-pool21	403151	116356	133150	6	184570	5.26616	0.288616	0.330273	1.48828e-05	403151	10x	tenx_B73	B73	NA	0.051477	2.01169	0.175	singlet	1	Protoderm
CB:Z:ATGGATCGTATCGCGC-pool21	37076	14606	18861	0	17427	4.24122	0.393948	0.508712	0	37076	10x	tenx_B73	B73	NA	-1.81884	5.16182	0.144231	singlet	9	Vascular_parenchyma_precursor
CB:Z:GCTTTCGAGAAATCTG-pool21	26359	7938	9190	0	14328	4.15619	0.30115	0.348648	0	26359	10x	tenx_B73	B73	NA	2.59452	0.037373	0.146154	singlet	11	Mesophyll
CB:Z:TTAGGTGCAAATGTCC-pool21	20331	7986	10774	0	10458	4.01945	0.392799	0.52993	0	20331	10x	tenx_B73	B73	NA	-2.17341	5.22826	0.165385	singlet	9	Vascular_parenchyma_precursor
CB:Z:TTAGGTGCAAGGATGC-pool21	58697	22017	28959	6	27792	4.44392	0.375096	0.493364	0.00010222	58697	10x	tenx_B73	B73	NA	-1.82057	5.27304	0.103846	singlet	9	Vascular_parenchyma_precursor
CB:Z:TTAGGTGCACCGTCTT-pool21	1502	622	799	0	829	2.91855	0.414115	0.531957	0	1502	10x	tenx_B73	B73	NA	-1.95323	4.95731	0.153846	singlet	9	Vascular_parenchyma_precursor
CB:Z:GGTCATACACTAGGAG-pool21	394436	120124	132987	4	177123	5.24827	0.304546	0.337157	1.01411e-05	394436	10x	tenx_B73	B73	NA	-0.0683496	2.00465	0.159615	singlet	1	Protoderm
CB:Z:TTTGGTTGTCTGGGAA-pool21	94510	35893	44822	4	43553	4.63902	0.37978	0.474257	4.23236e-05	94510	10x	tenx_B73	B73	NA	-1.15503	5.31783	0.0980769	singlet	9	Vascular_parenchyma_precursor
CB:Z:TTTGGTTGTCTGGGCT-pool21	4474	1819	2386	0	2539	3.40466	0.406571	0.533304	0	4474	10x	tenx_B73	B73	NA	-1.99696	4.84256	0.0596154	singlet	9	Vascular_parenchyma_precursor
CB:Z:CCTCCCTAGAGGTCCA-pool21	51278	18969	27504	2	23904	4.37847	0.369925	0.53637	3.90031e-05	51278	10x	tenx_B73	B73	NA	2.62625	0.133635	0.0923077	singlet	11	Mesophyll
CB:Z:GGAGAACAGTAATCAG-pool21	2974	1261	1635	0	1599	3.20385	0.424008	0.549765	0	2974	10x	tenx_B73	B73	NA	-2.20086	-1.90631	0.136538	singlet	4	Ground_meristem
CB:Z:GATCGTAGTAGAATAC-pool21	17684	4507	5217	0	9569	3.98087	0.254863	0.295012	0	17684	10x	tenx_B73	B73	NA	0.685686	-0.195961	0.134615	singlet	5	Ground_meristem
CB:Z:TTTGGTTGTATATGGA-pool21	22072	4909	5191	0	12206	4.08657	0.222408	0.235185	0	22072	10x	tenx_B73	B73	NA	4.45589	-0.642545	0.0884615	singlet	13	Bundle_sheath
CB:Z:TGTTAGGCACTACACA-pool21	93882	37344	52701	2	41073	4.61356	0.397776	0.561354	2.13033e-05	93882	10x	tenx_B73	B73	NA	-1.29308	5.50893	0.0846154	singlet	9	Vascular_parenchyma_precursor
CB:Z:GCTGCGACAGAGCCAA-pool21	153389	44466	48441	0	78004	4.89212	0.28989	0.315805	0	153389	10x	tenx_B73	B73	NA	-0.0496736	1.96834	0.132692	singlet	1	Protoderm
CB:Z:CAATCCCTCGGTTGTA-pool21	176413	53584	57727	2	85913	4.93406	0.303742	0.327226	1.1337e-05	176413	10x	tenx_B73	B73	NA	-0.157044	1.90682	0.138462	singlet	1	Protoderm
CB:Z:GCATGATAGCAGGACT-pool21	30058	11255	14747	4	16673	4.22201	0.374443	0.490618	0.000133076	30058	10x	tenx_B73	B73	NA	2.20697	5.79203	0.113462	singlet	3	Axillary_meristem
CB:Z:GTGCACGAGAGGCGGA-pool21	5727	1296	1783	0	3065	3.48643	0.226296	0.311332	0	5727	10x	tenx_B73	B73	NA	1.74096	-1.22233	0.105769	singlet	7	Ground_meristem
CB:Z:ATCCTCGGTCAGACGA-pool21	14652	3352	4354	0	7824	3.89343	0.228774	0.297161	0	14652	10x	tenx_B73	B73	NA	1.20409	0.172767	0.190385	singlet	5	Ground_meristem
CB:Z:ATCCTCGGTGAGGTCA-pool21	10267	2653	3251	0	5489	3.73949	0.258401	0.316646	0	10267	10x	tenx_B73	B73	NA	2.51392	-0.574455	0.0692308	singlet	11	Mesophyll
CB:Z:ATCCTCGGTTTAGAAG-pool21	6990	1857	2359	0	3733	3.57206	0.265665	0.337482	0	6990	10x	tenx_B73	B73	NA	2.56549	-0.54575	0.0903846	singlet	11	Mesophyll
CB:Z:TCCATCGAGGTTGTGG-pool21	3074	1354	1856	0	1652	3.21801	0.440468	0.603774	0	3074	10x	tenx_B73	B73	NA	-2.28123	-3.27115	0.109615	singlet	14	Procabium
CB:Z:CGGACCAAGGCCAGTA-pool21	2070	569	677	0	1132	3.05385	0.274879	0.327053	0	2070	10x	tenx_B73	B73	NA	2.75494	2.39883	0.075	singlet	6	Vascular_parenchyma
CB:Z:TTGCGAAAGTAGAAGG-pool21	202851	60567	66317	0	98737	4.99448	0.298579	0.326925	0	202851	10x	tenx_B73	B73	NA	-0.135595	2.58973	0.175	singlet	1	Protoderm
CB:Z:GCACCTTGTGCATCAT-pool21	165539	54401	69127	4	76824	4.8855	0.32863	0.417587	2.41635e-05	165539	10x	tenx_B73	B73	NA	0.110194	2.34475	0.188462	singlet	1	Protoderm
CB:Z:GCCAGACGTTCCTATT-pool21	168891	59233	79582	4	73478	4.86616	0.350717	0.471203	2.36839e-05	168891	10x	tenx_B73	B73	NA	0.104154	1.95511	0.138462	singlet	1	Protoderm
CB:Z:TTATGTCTCATCATGG-pool21	184551	46562	48175	2	94580	4.9758	0.252299	0.261039	1.08371e-05	184551	10x	tenx_B73	B73	NA	-0.226025	1.79376	0.175	singlet	1	Protoderm
CB:Z:TACCTCGTCTGGTACA-pool21	10784	3862	5440	0	5838	3.76626	0.358123	0.504451	0	10784	10x	tenx_B73	B73	NA	3.05599	-0.363617	0.125	singlet	11	Mesophyll
CB:Z:CCCAGAGAGACTTGAA-pool21	303093	109419	117937	4	129416	5.11199	0.361008	0.389112	1.31973e-05	303093	10x	tenx_B73	B73	NA	0.000970673	2.32922	0.126923	singlet	1	Protoderm
CB:Z:CCTATTAGTCTCAAAC-pool21	23596	8462	10975	0	11970	4.07809	0.35862	0.465121	0	23596	10x	tenx_B73	B73	NA	-1.57638	5.29874	0.132692	singlet	9	Vascular_parenchyma_precursor
CB:Z:ACAGAAACAGTAAGAT-pool21	252245	71605	82510	2	121554	5.08477	0.283871	0.327103	7.9288e-06	252245	10x	tenx_B73	B73	NA	-0.060582	1.91621	0.167308	singlet	1	Protoderm
CB:Z:ACCATCCGTAAACGAT-pool21	21627	4345	5147	0	11971	4.07813	0.200906	0.23799	0	21627	10x	tenx_B73	B73	NA	1.10661	0.522463	0.136538	singlet	5	Ground_meristem
CB:Z:AGGACGATCCCACGGA-pool21	170913	50964	56871	4	83552	4.92196	0.298187	0.332748	2.34037e-05	170913	10x	tenx_B73	B73	NA	-0.139637	2.23324	0.165385	singlet	1	Protoderm
CB:Z:CAGCTGGAGGCATGCA-pool21	21919	6426	8726	0	11300	4.05308	0.29317	0.398102	0	21919	10x	tenx_B73	B73	NA	4.43106	-0.554262	0.113462	singlet	13	Bundle_sheath
CB:Z:GCTCCTATCAATTGGC-pool21	59706	19682	23424	0	32204	4.50791	0.329649	0.392322	0	59706	10x	tenx_B73	B73	NA	4.45145	-0.622589	0.105769	singlet	11	Mesophyll
CB:Z:ATGTCGACAGGCAAGT-pool21	180928	63669	73784	2	83040	4.91929	0.351902	0.407809	1.10541e-05	180928	10x	tenx_B73	B73	NA	-0.299243	2.51428	0.173077	singlet	1	Protoderm
CB:Z:ATGCATGGTCCGGTAC-pool21	1106	327	365	0	658	2.81823	0.29566	0.330018	0	1106	10x	tenx_B73	B73	NA	4.48245	-0.352418	0.1	singlet	13	Bundle_sheath
CB:Z:TGATGCAGTATGGATA-pool21	7826	2754	3551	0	4530	3.6561	0.351904	0.453744	0	7826	10x	tenx_B73	B73	NA	2.35934	5.35331	0.138462	singlet	3	Axillary_meristem
CB:Z:CAGTGCGTCTGTGTGA-pool21	1173	289	346	0	697	2.84323	0.246377	0.29497	0	1173	10x	tenx_B73	B73	NA	-1.4434	-6.01453	0.0730769	singlet	8	Phloem
CB:Z:TGGCCTTCACCACAGC-pool21	22750	7470	9892	0	11589	4.06405	0.328352	0.434813	0	22750	10x	tenx_B73	B73	NA	4.60636	-2.01719	0.192308	singlet	13	Bundle_sheath
CB:Z:GTGCCAGAGTTATGAG-pool21	4809	1643	2333	0	2413	3.38256	0.341651	0.485132	0	4809	10x	tenx_B73	B73	NA	-1.55395	5.53955	0.0865385	singlet	9	Vascular_parenchyma_precursor
CB:Z:GCGAGAATCCCACGGA-pool21	269310	76003	78821	10	130861	5.11681	0.282214	0.292678	3.71319e-05	269310	10x	tenx_B73	B73	NA	-0.138212	1.84336	0.151923	singlet	1	Protoderm
CB:Z:TCTAGTTTCTCGACAA-pool21	76173	28380	34896	0	37445	4.57339	0.372573	0.458115	0	76173	10x	tenx_B73	B73	NA	-1.27374	5.60444	0.0557692	singlet	9	Vascular_parenchyma_precursor
CB:Z:GAAACAAAGCGCATTT-pool21	6827	2600	3633	0	3717	3.57019	0.380841	0.532152	0	6827	10x	tenx_B73	B73	NA	-2.04151	5.37548	0.115385	singlet	9	Vascular_parenchyma_precursor
CB:Z:TGATTTCCAATGGTAA-pool21	7918	3555	4885	0	4197	3.62294	0.448977	0.616949	0	7918	10x	tenx_B73	B73	NA	-2.00885	-2.13852	0.0769231	singlet	4	Ground_meristem
CB:Z:GATTAGCGTTTCTCTA-pool21	8225	2060	2853	0	4315	3.63498	0.250456	0.346869	0	8225	10x	tenx_B73	B73	NA	1.63996	0.0874737	0.178846	singlet	11	Mesophyll
CB:Z:GTGTCCTTCCATATCT-pool21	1458	523	723	0	820	2.91381	0.358711	0.495885	0	1458	10x	tenx_B73	B73	NA	3.14279	-0.273287	0.05	singlet	9	Vascular_parenchyma_precursor
CB:Z:GTGTCCTTCCATGACA-pool21	38294	12828	16319	0	18673	4.27121	0.334987	0.42615	0	38294	10x	tenx_B73	B73	NA	-1.81782	5.26761	0.121154	singlet	9	Vascular_parenchyma_precursor
CB:Z:AGCGTATTCGTTCAGA-pool21	98182	42034	50421	0	43984	4.64329	0.428123	0.513546	0	98182	10x	tenx_B73	B73	NA	-1.17526	5.45886	0.105769	singlet	9	Vascular_parenchyma_precursor
CB:Z:CCACGTTTCTTACGGA-pool21	146208	37222	39318	0	74991	4.87501	0.254583	0.268918	0	146208	10x	tenx_B73	B73	NA	0.0979537	2.11964	0.182692	singlet	1	Protoderm
CB:Z:GGACACCAGTGAGTGC-pool21	51444	18166	27573	0	23901	4.37842	0.353122	0.535981	0	51444	10x	tenx_B73	B73	NA	1.16975	-3.02576	0.1	singlet	2	Bundle_sheath
CB:Z:TGGCCTTAGCATGTGG-pool21	14529	3311	3893	0	7960	3.90091	0.227889	0.267947	0	14529	10x	tenx_B73	B73	NA	2.1445	-0.293441	0.107692	singlet	11	Mesophyll
CB:Z:ATGTCTTAGTCTCTAG-pool21	41979	12498	15447	6	21451	4.33145	0.29772	0.36797	0.000142929	41979	10x	tenx_B73	B73	NA	0.554603	0.612561	0.123077	singlet	5	Ground_meristem
CB:Z:TAAGTGCGTGCCCAGT-pool21	8764	2560	3200	0	4729	3.67477	0.292104	0.36513	0	8764	10x	tenx_B73	B73	NA	2.107	-0.12784	0.184615	singlet	11	Mesophyll
CB:Z:CCCTAGTGTCGTAGTT-pool21	26501	6561	8484	2	14312	4.1557	0.247576	0.320139	7.54689e-05	26501	10x	tenx_B73	B73	NA	1.33593	-0.588682	0.128846	singlet	5	Ground_meristem
CB:Z:ACTAGGTCATTTCTTG-pool21	36285	9922	9265	0	20792	4.3179	0.273446	0.25534	0	36285	10x	tenx_B73	B73	NA	-1.12167	5.42384	0.125	singlet	9	Vascular_parenchyma_precursor
CB:Z:TCAGGGCCAACGTAGG-pool21	69879	22903	32976	4	32950	4.51786	0.327752	0.471901	5.72418e-05	69879	10x	tenx_B73	B73	NA	1.62137	0.113721	0.190385	singlet	5	Ground_meristem
CB:Z:GTTACGATCGGATAGG-pool21	13537	4262	5867	0	6969	3.84317	0.314841	0.433405	0	13537	10x	tenx_B73	B73	NA	2.69306	-0.135101	0.115385	singlet	11	Mesophyll
CB:Z:CGGACCATCGCCACTT-pool21	3341	1072	1284	0	1917	3.28262	0.320862	0.384316	0	3341	10x	tenx_B73	B73	NA	2.04858	4.68897	0.075	singlet	3	Axillary_meristem
CB:Z:GGCATTAGTTACGCTA-pool21	44877	15233	18680	0	23106	4.36372	0.339439	0.416249	0	44877	10x	tenx_B73	B73	NA	3.08342	-0.215428	0.107692	singlet	11	Mesophyll
CB:Z:GGCATTAGTTACGGAG-pool21	21709	7515	9360	0	11862	4.07416	0.34617	0.431158	0	21709	10x	tenx_B73	B73	NA	3.14938	-0.329876	0.121154	singlet	11	Mesophyll
CB:Z:CCGTGAGTCGGTCAGC-pool21	76107	24867	30937	2	37961	4.57934	0.326737	0.406493	2.62788e-05	76107	10x	tenx_B73	B73	NA	0.470097	1.0289	0.123077	singlet	1	Protoderm
CB:Z:CATTCATGTGTGTGTT-pool21	15118	3294	4010	0	8050	3.9058	0.217886	0.265247	0	15118	10x	tenx_B73	B73	NA	1.10156	0.583687	0.0403846	singlet	5	Ground_meristem
CB:Z:CTCTCGACAGGACTGA-pool21	18089	5076	6600	2	9494	3.97745	0.280613	0.364863	0.000110564	18089	10x	tenx_B73	B73	NA	1.62038	0.0499597	0.188462	singlet	11	Mesophyll
CB:Z:TTAGCTTAGGCGTCCT-pool21	39352	13052	13653	0	19826	4.29724	0.331673	0.346946	0	39352	10x	tenx_B73	B73	NA	2.32987	0.174542	0.0865385	singlet	11	Mesophyll
CB:Z:ACCTGCTAGTGTGTAA-pool21	293729	91709	103009	2	134103	5.12744	0.312223	0.350694	6.809e-06	293729	10x	tenx_B73	B73	NA	-0.00519126	2.34428	0.151923	singlet	1	Protoderm
CB:Z:CATTCCGTCACATCCC-pool21	5666	1904	2396	0	3257	3.51282	0.33604	0.422873	0	5666	10x	tenx_B73	B73	NA	-1.41479	-1.07798	0.153846	singlet	4	Ground_meristem
CB:Z:CTACAGACACACGGTC-pool21	25796	8400	10127	0	15275	4.18398	0.325632	0.39258	0	25796	10x	tenx_B73	B73	NA	2.02	-0.656168	0.0807692	singlet	11	Mesophyll
CB:Z:TAGGTCAAGTCCCTCT-pool21	91302	32444	36756	0	43767	4.64115	0.355348	0.402576	0	91302	10x	tenx_B73	B73	NA	0.571668	0.92488	0.153846	singlet	1	Protoderm
CB:Z:TTGAGCATCGTTCCGT-pool21	22765	6233	7198	2	12104	4.08293	0.273797	0.316187	8.78542e-05	22765	10x	tenx_B73	B73	NA	0.7552	0.631098	0.192308	singlet	5	Ground_meristem
CB:Z:GGTGAAGTCGTCAACA-pool21	22315	5518	5762	0	11991	4.07886	0.247278	0.258212	0	22315	10x	tenx_B73	B73	NA	-1.67087	1.9352	0.121154	singlet	5	Ground_meristem
CB:Z:AACCAACTCCCTAAAG-pool21	136851	34059	38742	2	70213	4.84642	0.248877	0.283096	1.46144e-05	136851	10x	tenx_B73	B73	NA	0.0107572	1.69329	0.161538	singlet	1	Protoderm
CB:Z:GCATTCCTCTTCTCTC-pool21	7963	2852	3618	0	4407	3.64414	0.358156	0.454351	0	7963	10x	tenx_B73	B73	NA	2.44263	-0.840584	0.0673077	singlet	11	Mesophyll
CB:Z:TCAAAGCCAGCAATGG-pool21	153571	50570	67545	6	70121	4.84585	0.329294	0.439829	3.90699e-05	153571	10x	tenx_B73	B73	NA	0.34677	1.54952	0.175	singlet	1	Protoderm
CB:Z:GGAGTAGTCTAAACGC-pool21	17309	4150	4866	2	10116	4.00501	0.23976	0.281125	0.000115547	17309	10x	tenx_B73	B73	NA	1.69091	4.75234	0.0538462	singlet	3	Axillary_meristem
CB:Z:AAACTGCAGCAGAATT-pool21	66673	20387	23817	0	32732	4.51497	0.305776	0.357221	0	66673	10x	tenx_B73	B73	NA	2.33285	0.117299	0.182692	singlet	11	Mesophyll
CB:Z:CCAGATAAGGCCTCGT-pool21	18642	4018	4161	0	10701	4.02942	0.215535	0.223206	0	18642	10x	tenx_B73	B73	NA	2.26156	-0.0817364	0.182692	singlet	11	Mesophyll
CB:Z:TGCTATTTCCACACCT-pool21	51745	14015	19561	2	25674	4.40949	0.270847	0.378027	3.86511e-05	51745	10x	tenx_B73	B73	NA	0.975013	0.38797	0.163462	singlet	5	Ground_meristem
CB:Z:GGGTGTCAGAATACTG-pool21	2255	510	558	0	1327	3.12287	0.226164	0.24745	0	2255	10x	tenx_B73	B73	NA	0.52584	1.17001	0.105769	singlet	11	Mesophyll
CB:Z:ACCCAAATCCAGGTCG-pool21	101248	37180	50007	2	45613	4.65909	0.367217	0.493906	1.97535e-05	101248	10x	tenx_B73	B73	NA	-1.27533	5.35695	0.184615	singlet	9	Vascular_parenchyma_precursor
CB:Z:CCTAAAGCACTGCTTC-pool21	7892	2725	3664	0	4609	3.66361	0.345286	0.464268	0	7892	10x	tenx_B73	B73	NA	2.27643	5.75739	0.138462	singlet	3	Axillary_meristem
CB:Z:TAGGTGTTCTCTTAAC-pool21	14842	5232	6788	0	8409	3.92474	0.352513	0.457351	0	14842	10x	tenx_B73	B73	NA	2.19189	5.7806	0.0884615	singlet	3	Axillary_meristem
CB:Z:CGATGATCAATGTGTC-pool21	1407	336	353	0	915	2.96142	0.238806	0.250888	0	1407	10x	tenx_B73	B73	NA	0.673571	0.0626731	0.157692	singlet	5	Ground_meristem
CB:Z:GCTCAGGCACCCATCT-pool21	72621	21457	22022	2	36841	4.56633	0.295465	0.303246	2.75402e-05	72621	10x	tenx_B73	B73	NA	4.59816	-1.96753	0.190385	singlet	13	Bundle_sheath
CB:Z:GATCATGGTTATCGAC-pool21	36349	10464	11177	0	19655	4.29347	0.287876	0.307491	0	36349	10x	tenx_B73	B73	NA	2.3852	0.0733887	0.0903846	singlet	11	Mesophyll
CB:Z:TACCTATGTTATCGAC-pool21	102669	27052	28984	0	51751	4.71392	0.263488	0.282305	0	102669	10x	tenx_B73	B73	NA	0.608287	1.11614	0.171154	singlet	1	Protoderm
CB:Z:GCAACCGCAAGCAGGT-pool21	109642	42564	53359	2	48677	4.68732	0.388209	0.486666	1.82412e-05	109642	10x	tenx_B73	B73	NA	-1.19972	5.3686	0.105769	singlet	9	Vascular_parenchyma_precursor
CB:Z:ATGTTTCCAATGGCAG-pool21	96636	25645	30693	2	48239	4.6834	0.265377	0.317615	2.06962e-05	96636	10x	tenx_B73	B73	NA	0.678614	1.05407	0.119231	singlet	1	Protoderm
CB:Z:TGGCAATAGGTTGTGG-pool21	45625	13014	15037	0	24411	4.38759	0.285238	0.329578	0	45625	10x	tenx_B73	B73	NA	2.49955	0.182423	0.103846	singlet	11	Mesophyll
CB:Z:TAGCGGCGTGAGTTGG-pool21	2669	712	859	0	1522	3.18241	0.266767	0.321843	0	2669	10x	tenx_B73	B73	NA	-2.34816	0.0186286	0.0211538	singlet	12	Epidermis
CB:Z:TGTACAGAGGTAAGCC-pool21	29224	8445	10995	2	15231	4.18273	0.288975	0.376232	6.84369e-05	29224	10x	tenx_B73	B73	NA	4.49062	-1.98632	0.146154	singlet	13	Bundle_sheath
CB:Z:TGCCTCACATGTGAGG-pool21	252257	71652	77800	0	121166	5.08338	0.284044	0.308416	0	252257	10x	tenx_B73	B73	NA	-0.0936853	1.80747	0.155769	singlet	1	Protoderm
CB:Z:TACGGATAGCAGAGCT-pool21	105386	34622	42460	4	50020	4.69914	0.328526	0.4029	3.79557e-05	105386	10x	tenx_B73	B73	NA	0.371843	1.76617	0.171154	singlet	1	Protoderm
CB:Z:CACAACACATCAGAAA-pool21	95510	30186	34672	0	47579	4.67742	0.316051	0.36302	0	95510	10x	tenx_B73	B73	NA	4.46176	-2.05192	0.136538	singlet	13	Bundle_sheath
CB:Z:GTCACTCTCAGTACAC-pool21	309504	97546	111290	4	137924	5.13964	0.315169	0.359575	1.29239e-05	309504	10x	tenx_B73	B73	NA	0.0566779	2.25445	0.146154	singlet	1	Protoderm
CB:Z:AGCCTGGGTTGGCTTA-pool21	61212	20891	25617	0	30121	4.47887	0.341289	0.418496	0	61212	10x	tenx_B73	B73	NA	4.62682	-1.56998	0.125	singlet	13	Bundle_sheath
CB:Z:CTAGGGCCATTATGGC-pool21	18496	4588	6355	0	9743	3.98869	0.248054	0.343588	0	18496	10x	tenx_B73	B73	NA	0.945401	0.0233283	0.142308	singlet	5	Ground_meristem
CB:Z:TGTAGCAAGAGAGGTA-pool21	62081	19861	25869	6	30229	4.48042	0.319921	0.416698	9.66479e-05	62081	10x	tenx_B73	B73	NA	2.4735	0.241071	0.167308	singlet	11	Mesophyll
CB:Z:TGTAGCATCAGTGGTT-pool21	2019	527	670	0	1103	3.04258	0.26102	0.331847	0	2019	10x	tenx_B73	B73	NA	2.72938	0.0597183	0.138462	singlet	11	Mesophyll
CB:Z:GAGCGCTTCTCTGTTA-pool21	60416	16923	19608	2	30680	4.48686	0.280108	0.32455	3.31038e-05	60416	10x	tenx_B73	B73	NA	2.27211	0.18151	0.136538	singlet	11	Mesophyll
CB:Z:AAACTGCAGCGAGAAA-pool21	39339	11937	16621	0	19679	4.294	0.303439	0.422507	0	39339	10x	tenx_B73	B73	NA	1.0889	0.132054	0.180769	singlet	5	Ground_meristem
CB:Z:GTGTGATGTAGGTCTT-pool21	44541	12344	14680	0	23023	4.36216	0.277138	0.329584	0	44541	10x	tenx_B73	B73	NA	4.75515	-0.791982	0.101923	singlet	13	Bundle_sheath
CB:Z:ACCTGCTAGTAGGAAG-pool21	15574	3686	4774	0	8452	3.92696	0.236677	0.306537	0	15574	10x	tenx_B73	B73	NA	1.0233	0.264655	0.151923	singlet	5	Ground_meristem
CB:Z:CCCGTTATCAAAGTAG-pool21	2280	506	516	0	1325	3.12222	0.22193	0.226316	0	2280	10x	tenx_B73	B73	NA	-0.0238066	1.41468	0.0923077	singlet	1	Protoderm
CB:Z:ATCCAGATCCAATAGC-pool21	37309	10252	13394	0	19549	4.29112	0.274786	0.359002	0	37309	10x	tenx_B73	B73	NA	1.57393	0.10632	0.146154	singlet	11	Mesophyll
CB:Z:ACCTGCTTCCGTGCGA-pool21	148860	52705	66002	6	70040	4.84535	0.354058	0.443383	4.03063e-05	148860	10x	tenx_B73	B73	NA	0.0706852	2.28143	0.138462	singlet	1	Protoderm
CB:Z:TCGAGCGAGGAGAACA-pool21	26008	8045	9629	0	13486	4.12988	0.309328	0.370232	0	26008	10x	tenx_B73	B73	NA	4.44274	-0.578708	0.134615	singlet	13	Bundle_sheath
CB:Z:AATGTCGTCCGGGCAT-pool21	60393	15727	19630	2	31422	4.49723	0.260411	0.325038	3.31164e-05	60393	10x	tenx_B73	B73	NA	1.01473	-0.630403	0.111538	singlet	5	Ground_meristem
CB:Z:AGCCAGCGTAGACACG-pool21	27739	9557	13398	2	13888	4.14264	0.344533	0.483002	7.21007e-05	27739	10x	tenx_B73	B73	NA	2.14456	0.0477978	0.140385	singlet	11	Mesophyll
CB:Z:AGCCAGCGTCAGTGTT-pool21	10462	3899	5348	0	5500	3.74036	0.372682	0.511183	0	10462	10x	tenx_B73	B73	NA	2.86761	-0.308041	0.103846	singlet	11	Mesophyll
CB:Z:GAAGAGCGTTGAATAG-pool21	30889	9088	11883	0	15415	4.18794	0.294215	0.3847	0	30889	10x	tenx_B73	B73	NA	2.44681	0.0791071	0.0942308	singlet	11	Mesophyll
CB:Z:GCTTTCGAGTGGGACT-pool21	105712	26237	26709	0	55767	4.74638	0.248193	0.252658	0	105712	10x	tenx_B73	B73	NA	0.481229	1.09618	0.128846	singlet	1	Protoderm
CB:Z:TCGAGCGTCACCGCGA-pool21	3571	1408	1743	0	2036	3.30878	0.394287	0.488099	0	3571	10x	tenx_B73	B73	NA	2.23279	5.67231	0.103846	singlet	3	Axillary_meristem
CB:Z:GAAGTGGCAAGGTCGA-pool21	25019	8877	11634	4	14217	4.15281	0.35481	0.465007	0.000159878	25019	10x	tenx_B73	B73	NA	2.16121	5.80382	0.167308	singlet	3	Axillary_meristem
CB:Z:TTCGTTAAGGTAGGAA-pool21	74896	22312	25325	0	39071	4.59185	0.297906	0.338136	0	74896	10x	tenx_B73	B73	NA	2.37433	0.229288	0.155769	singlet	11	Mesophyll
CB:Z:CGTGGCAGTAACTCCA-pool21	185361	64263	78648	0	84174	4.92518	0.346691	0.424296	0	185361	10x	tenx_B73	B73	NA	0.136052	2.26374	0.176923	singlet	1	Protoderm
CB:Z:GGTGCTGGTCCGTAGC-pool21	14897	4655	6613	0	7802	3.89221	0.312479	0.443915	0	14897	10x	tenx_B73	B73	NA	1.01762	-0.479272	0.167308	singlet	5	Ground_meristem
CB:Z:GCTGAGCAGTGATTAG-pool21	2471	1052	1511	0	1342	3.12775	0.425739	0.611493	0	2471	10x	tenx_B73	B73	NA	-1.06885	-3.31685	0.151923	singlet	2	Bundle_sheath
CB:Z:TGCCTCATCGGTTGTA-pool21	43691	13544	16819	0	22141	4.3452	0.309995	0.384953	0	43691	10x	tenx_B73	B73	NA	2.51995	0.0614656	0.126923	singlet	11	Mesophyll
CB:Z:GCACCTTAGAAGCCGT-pool21	141529	52430	73979	4	60969	4.78511	0.370454	0.522713	2.82628e-05	141529	10x	tenx_B73	B73	NA	0.0951048	2.26592	0.182692	singlet	1	Protoderm
CB:Z:TTGTCTATCGCTTCAC-pool21	62060	17315	21414	0	31600	4.49969	0.279004	0.345053	0	62060	10x	tenx_B73	B73	NA	2.15149	0.115029	0.101923	singlet	11	Mesophyll
CB:Z:TACTCGCGTAACTGAA-pool21	18121	5252	7523	0	9502	3.97782	0.289829	0.415154	0	18121	10x	tenx_B73	B73	NA	1.68243	0.0314403	0.196154	singlet	11	Mesophyll
CB:Z:GCCAGACAGCACGTAG-pool21	1346	350	436	0	760	2.88081	0.26003	0.323923	0	1346	10x	tenx_B73	B73	NA	-0.735297	0.0870517	0.0730769	singlet	1	Protoderm
CB:Z:CATGCCTTCTTACGGA-pool21	40330	9478	10210	6	21223	4.32681	0.235011	0.253161	0.000148773	40330	10x	tenx_B73	B73	NA	1.03821	-0.787702	0.123077	singlet	5	Ground_meristem
CB:Z:CTGAATGGTGAGTCGA-pool21	42277	14044	18801	0	20901	4.32017	0.33219	0.44471	0	42277	10x	tenx_B73	B73	NA	1.54959	-0.637008	0.0211538	singlet	11	Mesophyll
CB:Z:CTGGCAGAGTTGCTTG-pool21	71598	25125	28702	0	33474	4.52471	0.350918	0.400877	0	71598	10x	tenx_B73	B73	NA	2.1796	0.381213	0.167308	singlet	11	Mesophyll
CB:Z:AAGGTTCTCACGGGTC-pool21	58747	19261	18117	2	36133	4.5579	0.327864	0.30839	3.40443e-05	58747	10x	tenx_B73	B73	NA	4.60598	-1.42446	0.153846	singlet	1	Protoderm
CB:Z:AAGATAGTCCCAGTAA-pool21	109483	37436	50259	4	50211	4.7008	0.341934	0.459058	3.65354e-05	109483	10x	tenx_B73	B73	NA	2.42222	0.227268	0.148077	singlet	11	Mesophyll
CB:Z:CTTGCCACAGCGTAGA-pool21	310121	100561	107006	0	141596	5.15105	0.324264	0.345046	0	310121	10x	tenx_B73	B73	NA	0.0368889	2.29263	0.144231	singlet	1	Protoderm
CB:Z:TGCTTTACATTTCTTG-pool21	91446	28868	32072	0	46208	4.66472	0.315684	0.350721	0	91446	10x	tenx_B73	B73	NA	0.32012	2.03056	0.144231	singlet	1	Protoderm
CB:Z:TTACCCGAGAGGAATG-pool21	88761	34136	45520	0	40444	4.60685	0.384583	0.512838	0	88761	10x	tenx_B73	B73	NA	-0.384459	2.73766	0.125	singlet	1	Protoderm
CB:Z:GTCCATCGTGCTTGAT-pool21	7192	2043	2729	0	3773	3.57669	0.284066	0.379449	0	7192	10x	tenx_B73	B73	NA	1.07162	0.499873	0.182692	singlet	5	Ground_meristem
CB:Z:GTCCATCGTTGGAGGT-pool21	1502	376	453	0	811	2.90902	0.250333	0.301598	0	1502	10x	tenx_B73	B73	NA	2.72448	-0.424255	0.0673077	singlet	11	Mesophyll
CB:Z:TCAAAGCTCAACTTGG-pool21	67432	21570	27443	0	32529	4.51227	0.319878	0.406973	0	67432	10x	tenx_B73	B73	NA	1.76566	0.170232	0.146154	singlet	11	Mesophyll
CB:Z:GCAACCGGTAACGGAC-pool21	91714	32153	42272	2	41985	4.62309	0.350579	0.460911	2.18069e-05	91714	10x	tenx_B73	B73	NA	1.02438	0.534806	0.151923	singlet	1	Protoderm
CB:Z:TGCATGATCACGTCAA-pool21	123934	39359	49192	6	58882	4.76998	0.31758	0.396921	4.84129e-05	123934	10x	tenx_B73	B73	NA	0.455599	1.3889	0.128846	singlet	1	Protoderm
CB:Z:GACTAGTTCCTTGACC-pool21	125906	48254	66471	4	55041	4.74069	0.383254	0.527941	3.17697e-05	125906	10x	tenx_B73	B73	NA	-1.01227	5.20978	0.125	singlet	9	Vascular_parenchyma_precursor
CB:Z:CAGCCTTTCGATAGGG-pool21	47166	9881	12362	4	25925	4.41372	0.209494	0.262096	8.48069e-05	47166	10x	tenx_B73	B73	NA	0.971078	0.423178	0.175	singlet	5	Ground_meristem
CB:Z:GTTACTTGTTTCGACA-pool21	34016	10440	12790	4	17730	4.24871	0.306914	0.376	0.000117592	34016	10x	tenx_B73	B73	NA	4.21925	-1.66692	0.126923	singlet	13	Bundle_sheath
CB:Z:GAACGTTTCGCATACA-pool21	322550	102705	113487	2	142716	5.15447	0.318416	0.351843	6.20059e-06	322550	10x	tenx_B73	B73	NA	0.0705528	2.25592	0.176923	singlet	1	Protoderm
CB:Z:CTCTAGCGTGCTTCCT-pool21	16800	5688	6775	0	9399	3.97308	0.338571	0.403274	0	16800	10x	tenx_B73	B73	NA	3.35933	-0.435901	0.115385	singlet	11	Mesophyll
CB:Z:CTCTAGCGTGGCATAG-pool21	172579	57261	69079	0	85038	4.92961	0.331796	0.400275	0	172579	10x	tenx_B73	B73	NA	0.123378	2.28045	0.155769	singlet	1	Protoderm
CB:Z:AGTGCCGCATGGGACA-pool21	34840	9791	11937	4	18077	4.25713	0.281028	0.342623	0.000114811	34840	10x	tenx_B73	B73	NA	-1.76435	1.4217	0.138462	singlet	12	Epidermis
CB:Z:TTCGATTCAACTCCCT-pool21	40785	9946	10689	0	21902	4.34048	0.243864	0.262082	0	40785	10x	tenx_B73	B73	NA	-1.61249	1.20227	0.136538	singlet	12	Epidermis
CB:Z:ACCATCCTCCGGCGAT-pool21	52047	15999	19303	2	26570	4.42439	0.307395	0.370876	3.84268e-05	52047	10x	tenx_B73	B73	NA	4.4899	-1.89923	0.126923	singlet	13	Bundle_sheath
CB:Z:CGCTAGGAGCCTATAC-pool21	49310	15646	18465	0	25377	4.40444	0.317299	0.374468	0	49310	10x	tenx_B73	B73	NA	2.66604	-0.038252	0.161538	singlet	11	Mesophyll
CB:Z:ATCCTCGAGTCCGTGC-pool21	115497	37001	41617	2	57177	4.75722	0.320363	0.36033	1.73165e-05	115497	10x	tenx_B73	B73	NA	-0.317868	2.56355	0.151923	singlet	1	Protoderm
CB:Z:CAAGCTACATCGACGC-pool21	105243	37460	47663	0	50317	4.70171	0.355938	0.452885	0	105243	10x	tenx_B73	B73	NA	-0.0339836	2.11273	0.157692	singlet	1	Protoderm
CB:Z:CCCAGAGCAATTCGTG-pool21	5891	2392	3114	0	3265	3.51388	0.406043	0.528603	0	5891	10x	tenx_B73	B73	NA	-2.60169	0.575903	0.123077	singlet	12	Epidermis
CB:Z:GGAATCTCAAGACTAA-pool21	7416	1769	2040	2	4174	3.62055	0.238538	0.275081	0.000269687	7416	10x	tenx_B73	B73	NA	1.02056	-0.736693	0.140385	singlet	5	Ground_meristem
CB:Z:GCTTAAGCATCCGTGG-pool21	21817	7470	7988	0	11126	4.04634	0.342394	0.366136	0	21817	10x	tenx_B73	B73	NA	-0.811191	3.40788	0.119231	singlet	9	Vascular_parenchyma_precursor
CB:Z:ATGTACGGTGATTCCA-pool21	37891	13515	21308	12	17950	4.25406	0.356681	0.56235	0.000316698	37891	10x	tenx_B73	B73	NA	3.16846	-0.310935	0.136538	singlet	11	Mesophyll
CB:Z:AAAGGATAGACGCCAA-pool21	45634	16836	25254	4	21681	4.33608	0.368935	0.553403	8.76539e-05	45634	10x	tenx_B73	B73	NA	2.01573	-0.911506	0.115385	singlet	11	Mesophyll
CB:Z:CATAACGAGACGCCAA-pool21	29620	11608	17611	2	14310	4.15564	0.391897	0.594564	6.75219e-05	29620	10x	tenx_B73	B73	NA	1.96697	-1.05827	0.0961538	singlet	7	Ground_meristem
CB:Z:CGCAGGTTCCATCTAT-pool21	188142	60734	74635	2	85983	4.93441	0.322809	0.396695	1.06303e-05	188142	10x	tenx_B73	B73	NA	-0.132159	1.80988	0.148077	singlet	1	Protoderm
CB:Z:TTCATCAAGCAACGGT-pool21	234522	62141	72824	4	113281	5.05416	0.264969	0.310521	1.7056e-05	234522	10x	tenx_B73	B73	NA	-0.162828	1.86999	0.171154	singlet	1	Protoderm
CB:Z:GTGGATTCAAACCTAC-pool21	12474	4513	5646	0	7266	3.8613	0.361793	0.452621	0	12474	10x	tenx_B73	B73	NA	2.49094	4.6869	0.138462	singlet	3	Axillary_meristem
CB:Z:CCGCATTGTGCTTGAT-pool21	106588	38173	48116	0	52127	4.71706	0.358136	0.45142	0	106588	10x	tenx_B73	B73	NA	0.0860443	2.26214	0.123077	singlet	1	Protoderm
CB:Z:GCTCCTAAGAGATTAC-pool21	220479	76794	95077	0	100790	5.00342	0.348305	0.431229	0	220479	10x	tenx_B73	B73	NA	0.0750337	2.2537	0.155769	singlet	1	Protoderm
CB:Z:TTTGAGGGTACGACCC-pool21	97424	22938	25166	0	49959	4.69861	0.235445	0.258314	0	97424	10x	tenx_B73	B73	NA	-0.957301	2.44724	0.117308	singlet	1	Protoderm
CB:Z:TAGGTCAAGGGCGAAG-pool21	28547	9573	12381	0	13977	4.14541	0.335342	0.433706	0	28547	10x	tenx_B73	B73	NA	-1.37562	5.64051	0.0788462	singlet	9	Vascular_parenchyma_precursor
CB:Z:TTGCTATAGAGGTACC-pool21	198363	67045	75572	2	89586	4.95224	0.337991	0.380978	1.00825e-05	198363	10x	tenx_B73	B73	NA	0.0923678	1.90968	0.138462	singlet	1	Protoderm
CB:Z:CTTTGCGGTTCCCAAA-pool21	72769	19207	22591	2	38200	4.58206	0.263945	0.310448	2.74842e-05	72769	10x	tenx_B73	B73	NA	0.617022	-0.53705	0.117308	singlet	5	Ground_meristem
CB:Z:GTTGGTAGTAGGTCTT-pool21	35065	10520	13167	0	18179	4.25957	0.300014	0.375503	0	35065	10x	tenx_B73	B73	NA	2.61445	0.0502875	0.113462	singlet	11	Mesophyll
CB:Z:TAGTCCCAGAACTAAC-pool21	128747	44505	54883	2	59507	4.77457	0.345678	0.426286	1.55343e-05	128747	10x	tenx_B73	B73	NA	-0.440955	2.66874	0.1	singlet	1	Protoderm
CB:Z:ATTGTCTTCTATGAGC-pool21	37144	10102	10912	0	19020	4.27921	0.271969	0.293776	0	37144	10x	tenx_B73	B73	NA	-0.493585	3.1232	0.123077	singlet	5	Ground_meristem
CB:Z:ACTCGGGAGAGCCACA-pool21	3173	1340	1829	0	1707	3.23223	0.422313	0.576426	0	3173	10x	tenx_B73	B73	NA	-2.21114	-0.813313	0.115385	singlet	4	Ground_meristem
CB:Z:TAGCTTTGTCTGGGCT-pool21	45039	9049	9964	0	25305	4.40321	0.200915	0.22123	0	45039	10x	tenx_B73	B73	NA	0.899966	0.256874	0.171154	singlet	5	Ground_meristem
CB:Z:CTGTATTGTTTCTACT-pool21	4024	1623	2277	0	2160	3.33445	0.40333	0.565855	0	4024	10x	tenx_B73	B73	NA	-2.10618	-3.60156	0.142308	singlet	14	Procabium
CB:Z:TAAGTGCGTTAACCGT-pool21	16441	5585	7153	0	9443	3.97511	0.3397	0.435071	0	16441	10x	tenx_B73	B73	NA	2.23376	5.74775	0.113462	singlet	3	Axillary_meristem
CB:Z:CTTGAAGTCGACTATG-pool21	22219	5205	6111	0	11913	4.07602	0.234259	0.275035	0	22219	10x	tenx_B73	B73	NA	2.08245	0.162848	0.0711538	singlet	11	Mesophyll
CB:Z:AACTGGTCAAGACACG-pool21	25743	9646	13008	0	14297	4.15524	0.374704	0.505302	0	25743	10x	tenx_B73	B73	NA	2.24214	5.80113	0.0942308	singlet	3	Axillary_meristem
CB:Z:TTGAGCATCCACGGCA-pool21	37335	13297	18681	0	18384	4.26444	0.356154	0.500362	0	37335	10x	tenx_B73	B73	NA	-1.69009	5.24449	0.138462	singlet	9	Vascular_parenchyma_precursor
CB:Z:GCGCCAATCCCATAGA-pool21	37730	9024	10547	0	20023	4.30153	0.239173	0.279539	0	37730	10x	tenx_B73	B73	NA	1.01768	0.675531	0.159615	singlet	5	Ground_meristem
CB:Z:GAATCTGTCTCGCGGA-pool21	154285	49972	57364	0	72702	4.86155	0.323894	0.371805	0	154285	10x	tenx_B73	B73	NA	0.040853	2.37919	0.155769	singlet	1	Protoderm
CB:Z:CGCTATCGTCCACCAG-pool21	2177	667	629	0	1267	3.10278	0.306385	0.28893	0	2177	10x	tenx_B73	B73	NA	-2.13535	2.51057	0.0903846	singlet	12	Epidermis
CB:Z:TGGAAGGGTCCACCAG-pool21	27295	7463	7052	0	14924	4.17389	0.27342	0.258362	0	27295	10x	tenx_B73	B73	NA	-1.74248	1.93449	0.115385	singlet	5	Ground_meristem
CB:Z:TCACCTGCAGCAACGA-pool21	40378	12623	15446	2	20334	4.30822	0.312621	0.382535	4.95319e-05	40378	10x	tenx_B73	B73	NA	2.25521	-0.150404	0.159615	singlet	11	Mesophyll
CB:Z:CTAGGGCAGACAGTGC-pool21	65247	22036	29269	0	31599	4.49967	0.337732	0.448588	0	65247	10x	tenx_B73	B73	NA	2.12301	0.202332	0.192308	singlet	11	Mesophyll
CB:Z:TGTTAGGAGACAGTGC-pool21	16451	6193	8349	0	8610	3.935	0.376451	0.507507	0	16451	10x	tenx_B73	B73	NA	3.31806	-0.463922	0.107692	singlet	11	Mesophyll
CB:Z:CTCAGAACATCCCAAA-pool21	19340	3949	4064	0	11024	4.04234	0.204188	0.210134	0	19340	10x	tenx_B73	B73	NA	0.918245	0.646684	0.157692	singlet	5	Ground_meristem
CB:Z:TTACCGCAGTTCGCGC-pool21	52403	14701	21005	0	25925	4.41372	0.280537	0.400836	0	52403	10x	tenx_B73	B73	NA	1.1226	0.161368	0.173077	singlet	5	Ground_meristem
CB:Z:TATCGAGGTGAGTAAT-pool21	90464	35458	47929	0	39895	4.60092	0.391957	0.529813	0	90464	10x	tenx_B73	B73	NA	-1.33895	5.40689	0.117308	singlet	9	Vascular_parenchyma_precursor
CB:Z:TTACCCGGTTTCGACA-pool21	51413	16291	21961	0	25140	4.40037	0.316865	0.427149	0	51413	10x	tenx_B73	B73	NA	4.21218	-1.87261	0.132692	singlet	13	Bundle_sheath
CB:Z:GAACCGCCAGATGGCA-pool21	191191	69868	78482	2	83171	4.91997	0.365436	0.41049	1.04607e-05	191191	10x	tenx_B73	B73	NA	-0.141888	2.53598	0.180769	singlet	1	Protoderm
CB:Z:GGGAACAGTCAGGTGA-pool21	7037	2041	2951	0	3627	3.55955	0.290038	0.419355	0	7037	10x	tenx_B73	B73	NA	1.17529	0.574543	0.0980769	singlet	5	Ground_meristem
CB:Z:TGAATCGCAAAGAAGG-pool21	1177	432	529	0	645	2.80956	0.367035	0.449448	0	1177	10x	tenx_B73	B73	NA	1.62624	-2.76858	0.126923	singlet	2	Bundle_sheath
CB:Z:TGAATCGCACAGTAGG-pool21	64516	22470	28585	0	32829	4.51626	0.348286	0.443068	0	64516	10x	tenx_B73	B73	NA	3.4807	-0.243812	0.126923	singlet	11	Mesophyll
CB:Z:TGAATCGCATTAGCAC-pool21	309273	101458	125970	10	132900	5.12352	0.328053	0.40731	3.23339e-05	309273	10x	tenx_B73	B73	NA	-0.00846057	2.08278	0.146154	singlet	1	Protoderm
CB:Z:ATCCAGATCGCGGCAT-pool21	68469	26401	35774	0	31626	4.50004	0.385591	0.522485	0	68469	10x	tenx_B73	B73	NA	2.37071	0.287662	0.0980769	singlet	11	Mesophyll
CB:Z:CGGACCAGTTAACTCG-pool21	61973	19932	25702	4	30616	4.48595	0.321624	0.414729	6.45442e-05	61973	10x	tenx_B73	B73	NA	1.10553	0.267021	0.105769	singlet	5	Ground_meristem
CB:Z:TGCTTTAAGTCATCTG-pool21	46803	15753	16187	0	24250	4.38471	0.336581	0.345854	0	46803	10x	tenx_B73	B73	NA	4.6889	-1.89112	0.130769	singlet	13	Bundle_sheath
CB:Z:CCTTGGTAGGTCTTGT-pool21	74166	19400	22512	0	37831	4.57785	0.261575	0.303535	0	74166	10x	tenx_B73	B73	NA	2.19451	0.165989	0.176923	singlet	11	Mesophyll
CB:Z:TGTGACAAGACGAAAG-pool21	6380	1611	2254	0	3349	3.52492	0.252508	0.353292	0	6380	10x	tenx_B73	B73	NA	0.918341	-0.0653146	0.125	singlet	5	Ground_meristem
CB:Z:AACCGATAGACAGTGC-pool21	3979	1456	1911	0	2223	3.34694	0.365921	0.480271	0	3979	10x	tenx_B73	B73	NA	3.03546	-0.527603	0.1	singlet	11	Mesophyll
CB:Z:AGTCAACTCCGGAAAG-pool21	16746	4908	6540	0	8676	3.93832	0.293085	0.390541	0	16746	10x	tenx_B73	B73	NA	-1.81466	1.88209	0.109615	singlet	5	Ground_meristem
CB:Z:AAATGCCTCTGGGCGT-pool21	4704	1500	1613	0	2753	3.43981	0.318878	0.3429	0	4704	10x	tenx_B73	B73	NA	2.42059	-0.797794	0.075	singlet	11	Mesophyll
CB:Z:AAATGCCTCTGTGTGA-pool21	116772	34858	38427	4	58535	4.76742	0.298513	0.329077	3.42548e-05	116772	10x	tenx_B73	B73	NA	0.276002	1.35457	0.105769	singlet	1	Protoderm
CB:Z:TGGACATGTTGCTTGA-pool21	118874	43203	58011	4	53469	4.7281	0.363435	0.488004	3.36491e-05	118874	10x	tenx_B73	B73	NA	0.0560925	2.04152	0.196154	singlet	1	Protoderm
CB:Z:TGGTCCTGTTGCTTGA-pool21	12748	4888	6861	0	6729	3.82795	0.383433	0.538202	0	12748	10x	tenx_B73	B73	NA	4.28389	-1.0952	0.0846154	singlet	13	Bundle_sheath
CB:Z:GCCAGCATCAGCCGAC-pool21	48352	19615	26429	0	22793	4.3578	0.405671	0.546596	0	48352	10x	tenx_B73	B73	NA	-1.48264	5.65532	0.111538	singlet	9	Vascular_parenchyma_precursor
CB:Z:TTACGGACATTGCCTC-pool21	27220	11422	14057	0	15096	4.17886	0.419618	0.516422	0	27220	10x	tenx_B73	B73	NA	-2.03609	5.21077	0.157692	singlet	9	Vascular_parenchyma_precursor
CB:Z:CGGACCAGTTGGGAAC-pool21	30134	10276	13463	0	15407	4.18772	0.34101	0.446771	0	30134	10x	tenx_B73	B73	NA	3.09922	-2.04217	0.101923	singlet	2	Bundle_sheath
CB:Z:CCTGCTACATCTCACC-pool21	55028	16075	18739	0	27531	4.43982	0.292124	0.340536	0	55028	10x	tenx_B73	B73	NA	0.529573	1.72122	0.138462	singlet	1	Protoderm
CB:Z:TTTGCGCTCAAGGCAG-pool21	31699	9476	9942	2	16976	4.22984	0.298937	0.313638	6.30935e-05	31699	10x	tenx_B73	B73	NA	0.286719	0.178805	0.1	singlet	5	Ground_meristem
CB:Z:AACATCGCAGGTAACG-pool21	1077	222	221	0	621	2.79309	0.206128	0.2052	0	1077	10x	tenx_B73	B73	NA	-0.525071	1.40054	0.136538	singlet	1	Protoderm
CB:Z:CGCGCAAAGTTGCCGC-pool21	117617	37418	44513	2	57011	4.75596	0.318134	0.378457	1.70043e-05	117617	10x	tenx_B73	B73	NA	0.183622	1.66309	0.173077	singlet	1	Protoderm
CB:Z:GGTGAAGAGGCGTCCT-pool21	4524	1514	2034	0	2485	3.39533	0.33466	0.449602	0	4524	10x	tenx_B73	B73	NA	0.944105	-1.62004	0.123077	singlet	7	Ground_meristem
CB:Z:TAAGCCAAGGCTTTAC-pool21	44153	11215	10033	0	23685	4.37447	0.254003	0.227233	0	44153	10x	tenx_B73	B73	NA	-0.651245	-6.45473	0.167308	singlet	8	Phloem
CB:Z:CAGGGCTGTCGCTAGC-pool21	41550	13270	17184	0	20635	4.3146	0.319374	0.413574	0	41550	10x	tenx_B73	B73	NA	2.45202	0.0986769	0.1	singlet	11	Mesophyll
CB:Z:GCAGCTGAGAACGACC-pool21	29334	8633	10966	4	14923	4.17386	0.2943	0.373832	0.000136361	29334	10x	tenx_B73	B73	NA	1.14527	0.302105	0.0788462	singlet	5	Ground_meristem
CB:Z:GGAACCCCATGCCTTC-pool21	34401	7015	8631	2	18711	4.2721	0.203918	0.250894	5.81378e-05	34401	10x	tenx_B73	B73	NA	1.10157	0.302644	0.0788462	singlet	5	Ground_meristem
CB:Z:GACCTTCTCTTCGTTA-pool21	102846	38295	43101	2	48122	4.68234	0.372353	0.419083	1.94466e-05	102846	10x	tenx_B73	B73	NA	-1.0838	5.44381	0.107692	singlet	9	Vascular_parenchyma_precursor
CB:Z:CGAGTTAAGTAGTGTA-pool21	135180	45001	53638	0	64914	4.81234	0.332897	0.396789	0	135180	10x	tenx_B73	B73	NA	-0.0275181	2.25062	0.153846	singlet	1	Protoderm
CB:Z:CCTGCTAAGTCAGGAC-pool21	32213	12204	16624	0	15732	4.19678	0.378853	0.516065	0	32213	10x	tenx_B73	B73	NA	3.31649	2.23608	0.0673077	singlet	6	Vascular_parenchyma
CB:Z:ATAGTCGCATCCGTGG-pool21	33138	10279	12122	0	17179	4.235	0.310188	0.365804	0	33138	10x	tenx_B73	B73	NA	-0.775679	-3.48499	0.142308	singlet	1	Protoderm
CB:Z:TCAAGCATCCGGACTG-pool21	76584	24726	31387	10	37524	4.57431	0.322861	0.409838	0.000130576	76584	10x	tenx_B73	B73	NA	0.751518	0.734399	0.146154	singlet	5	Ground_meristem
CB:Z:CGGACTGAGGCTTAAA-pool21	526513	150791	154812	4	239864	5.37997	0.286396	0.294033	7.59715e-06	526513	10x	tenx_B73	B73	NA	0.0952178	2.18376	0.163462	singlet	1	Protoderm
CB:Z:TCGCAGGGTGGACAGT-pool21	91828	29580	34925	0	45891	4.66173	0.322124	0.380331	0	91828	10x	tenx_B73	B73	NA	-1.04109	5.16415	0.178846	singlet	9	Vascular_parenchyma_precursor
CB:Z:CTCACCATCTATATCC-pool21	3268	1024	1322	0	1923	3.28398	0.313341	0.404529	0	3268	10x	tenx_B73	B73	NA	2.44106	4.43988	0.115385	singlet	4	Ground_meristem
CB:Z:TTTGTGTCAGGGTACA-pool21	3558	1221	1423	0	2062	3.31429	0.34317	0.399944	0	3558	10x	tenx_B73	B73	NA	-0.789376	3.99029	0.0326923	singlet	9	Vascular_parenchyma_precursor
CB:Z:GAGGTCCCATCTGCAA-pool21	2601	703	845	0	1480	3.17026	0.270281	0.324875	0	2601	10x	tenx_B73	B73	NA	1.63206	4.39226	0.0596154	singlet	3	Axillary_meristem
CB:Z:GAGATTCAGGCATGCA-pool21	1018	334	365	0	591	2.77159	0.328094	0.358546	0	1018	10x	tenx_B73	B73	NA	0.137091	1.55129	0.130769	singlet	1	Protoderm
CB:Z:TTTGCGCCATGGGTGA-pool21	65753	21372	26303	2	32485	4.51168	0.325035	0.400027	3.04169e-05	65753	10x	tenx_B73	B73	NA	-1.85569	5.1799	0.126923	singlet	9	Vascular_parenchyma_precursor
CB:Z:GATTGACAGTAACACA-pool21	20626	5679	6902	0	10795	4.03322	0.275332	0.334626	0	20626	10x	tenx_B73	B73	NA	4.56414	-0.871431	0.123077	singlet	13	Bundle_sheath
CB:Z:ATCCTCGGTAATGCCT-pool21	3995	1082	1407	0	2147	3.33183	0.270839	0.35219	0	3995	10x	tenx_B73	B73	NA	2.51008	-0.624158	0.0653846	singlet	11	Mesophyll
CB:Z:ATCCTCGGTCATGAGG-pool21	2915	815	1043	0	1599	3.20385	0.279588	0.357804	0	2915	10x	tenx_B73	B73	NA	2.43436	-0.571863	0.113462	singlet	11	Mesophyll
CB:Z:ATCCTCGGTTGGAGGT-pool21	5508	1521	1878	0	2969	3.47261	0.276144	0.340959	0	5508	10x	tenx_B73	B73	NA	2.56154	-0.600208	0.0673077	singlet	11	Mesophyll
CB:Z:AAAGATGCATCGTACA-pool21	143443	42734	50010	0	70388	4.8475	0.297916	0.34864	0	143443	10x	tenx_B73	B73	NA	4.29298	-1.75194	0.165385	singlet	13	Bundle_sheath
CB:Z:AGCTATGCATAGAATG-pool21	29146	8410	11077	4	14559	4.16313	0.288547	0.380052	0.00013724	29146	10x	tenx_B73	B73	NA	0.934473	0.517402	0.163462	singlet	5	Ground_meristem
CB:Z:AGCTATGCATGGTTTG-pool21	4109	1369	1711	0	2233	3.34889	0.333171	0.416403	0	4109	10x	tenx_B73	B73	NA	2.63888	-0.497732	0.0980769	singlet	11	Mesophyll
CB:Z:TACCTCGCAAGTCTCA-pool21	3988	1311	1488	2	2336	3.36847	0.328736	0.373119	0.000501505	3988	10x	tenx_B73	B73	NA	1.93567	4.79973	0.0788462	singlet	3	Axillary_meristem
CB:Z:AATGGCTCACCGTTGG-pool21	42947	13320	17819	14	21183	4.32599	0.31015	0.414907	0.000325983	42947	10x	tenx_B73	B73	NA	1.03296	0.311477	0.130769	singlet	5	Ground_meristem
CB:Z:GATTGACCACAGTTAC-pool21	1635	412	485	0	924	2.96567	0.251988	0.296636	0	1635	10x	tenx_B73	B73	NA	1.99983	4.79348	0.0884615	singlet	3	Axillary_meristem
CB:Z:GTAGGAGGTTGGGAAC-pool21	27189	8354	9563	2	14218	4.15284	0.307257	0.351723	7.35592e-05	27189	10x	tenx_B73	B73	NA	3.12931	1.86655	0.123077	singlet	6	Vascular_parenchyma
CB:Z:TCGGGACCATTTCACT-pool21	37795	13128	20523	6	18124	4.25825	0.347348	0.543008	0.000158751	37795	10x	tenx_B73	B73	NA	2.41928	0.0442414	0.115385	singlet	11	Mesophyll
CB:Z:GCATGATTCTCTGCGT-pool21	15488	4911	6548	0	7835	3.89404	0.317084	0.422779	0	15488	10x	tenx_B73	B73	NA	-1.894	5.21509	0.159615	singlet	9	Vascular_parenchyma_precursor
CB:Z:ACTAGGTCATGGCCTG-pool21	15802	3729	4397	0	8830	3.94596	0.235983	0.278256	0	15802	10x	tenx_B73	B73	NA	0.770971	-0.0160303	0.130769	singlet	5	Ground_meristem
CB:Z:CCCTAGTCAAGGATGC-pool21	2991	977	1281	0	1653	3.21827	0.326647	0.428285	0	2991	10x	tenx_B73	B73	NA	-2.25024	-1.87017	0.130769	singlet	4	Ground_meristem
CB:Z:TTGCAGACAAAGCATA-pool21	6203	2125	2784	0	3575	3.55328	0.342576	0.448815	0	6203	10x	tenx_B73	B73	NA	-1.70841	-1.26597	0.103846	singlet	12	Epidermis
CB:Z:AGCGTGCCAGATTTGC-pool21	3961	915	1095	0	2190	3.34044	0.231002	0.276445	0	3961	10x	tenx_B73	B73	NA	-1.03894	-6.30726	0.134615	singlet	8	Phloem
CB:Z:GCCAGACTCTCTTCTC-pool21	4875	1193	1549	0	2606	3.41597	0.244718	0.317744	0	4875	10x	tenx_B73	B73	NA	2.59639	-0.046888	0.15	singlet	11	Mesophyll
CB:Z:TAGTCCCGTCTGTCCT-pool21	8156	2322	2393	0	4233	3.62665	0.284698	0.293404	0	8156	10x	tenx_B73	B73	NA	-1.39896	2.00222	0.176923	singlet	12	Epidermis
CB:Z:AATGGCTGTCTCAAAC-pool21	46135	10802	11310	4	25291	4.40297	0.234139	0.24515	8.67021e-05	46135	10x	tenx_B73	B73	NA	2.34956	0.0576679	0.0711538	singlet	11	Mesophyll
CB:Z:TACATGGAGGATTAAC-pool21	53910	18211	25982	4	25655	4.40917	0.337804	0.481951	7.41977e-05	53910	10x	tenx_B73	B73	NA	2.76238	0.0983516	0.165385	singlet	11	Mesophyll
CB:Z:GGAATCTGTTAAGGGC-pool21	41061	11328	15247	4	21136	4.32502	0.275882	0.371326	9.7416e-05	41061	10x	tenx_B73	B73	NA	1.7694	0.0745833	0.148077	singlet	11	Mesophyll
CB:Z:TAGGTCACAAGTAACA-pool21	112663	35606	47482	8	52625	4.72119	0.31604	0.421452	7.10082e-05	112663	10x	tenx_B73	B73	NA	2.06508	0.262179	0.182692	singlet	11	Mesophyll
CB:Z:AAGATAGGTGGTAGAC-pool21	9764	2546	2815	0	5423	3.73424	0.260754	0.288304	0	9764	10x	tenx_B73	B73	NA	-1.63201	5.22824	0.113462	singlet	9	Vascular_parenchyma_precursor
CB:Z:ACTATTCGTCTGAGCC-pool21	2828	688	767	0	1649	3.21722	0.243281	0.271216	0	2828	10x	tenx_B73	B73	NA	-1.66828	5.67756	0.125	singlet	9	Vascular_parenchyma_precursor
CB:Z:GTTACGATCCGAGAGA-pool21	15524	5119	7022	2	8047	3.90563	0.329747	0.452332	0.000128833	15524	10x	tenx_B73	B73	NA	3.11777	-0.233215	0.134615	singlet	11	Mesophyll
CB:Z:GCGGTGTGTTCCGCGA-pool21	2074	651	815	0	1183	3.07298	0.313886	0.39296	0	2074	10x	tenx_B73	B73	NA	4.19844	-0.92414	0.0653846	singlet	13	Bundle_sheath
CB:Z:GTTACGACATGGCCCA-pool21	68350	22951	32129	2	32627	4.51358	0.335786	0.470066	2.92612e-05	68350	10x	tenx_B73	B73	NA	2.68129	0.0519886	0.182692	singlet	11	Mesophyll
CB:Z:CAGCTGGTCAGTGGTT-pool21	16510	3367	3712	0	9021	3.95525	0.203937	0.224833	0	16510	10x	tenx_B73	B73	NA	2.41253	0.201806	0.138462	singlet	11	Mesophyll
CB:Z:TCCCACACAAAGCTTC-pool21	6251	1365	2124	0	3341	3.52388	0.218365	0.339786	0	6251	10x	tenx_B73	B73	NA	1.11264	0.280243	0.144231	singlet	5	Ground_meristem
CB:Z:GTTACGACAGAAGTGC-pool21	26654	7015	10297	0	13759	4.13859	0.263188	0.386321	0	26654	10x	tenx_B73	B73	NA	0.916686	0.0208363	0.0615385	singlet	5	Ground_meristem
CB:Z:TCTCAGCAGGAAGGTA-pool21	170283	65838	92444	0	70669	4.84923	0.386639	0.542884	0	170283	10x	tenx_B73	B73	NA	0.100612	2.30191	0.178846	singlet	1	Protoderm
CB:Z:CACCTGTAGTGTCGGA-pool21	47838	14876	19274	2	23796	4.3765	0.310966	0.402901	4.18078e-05	47838	10x	tenx_B73	B73	NA	4.29035	-1.86438	0.0903846	singlet	13	Bundle_sheath
CB:Z:CCGCATTCATTGTTCT-pool21	1627	470	577	0	941	2.97359	0.288875	0.35464	0	1627	10x	tenx_B73	B73	NA	1.8474	4.94064	0.0730769	singlet	3	Axillary_meristem
CB:Z:ACTATTCAGCCATCAT-pool21	30152	9035	9482	0	15490	4.19005	0.299648	0.314473	0	30152	10x	tenx_B73	B73	NA	0.920766	0.363075	0.196154	singlet	5	Ground_meristem
CB:Z:GTGCACGGTTTCCGGG-pool21	29869	8422	10724	0	15318	4.1852	0.281965	0.359034	0	29869	10x	tenx_B73	B73	NA	1.09758	0.0577901	0.171154	singlet	5	Ground_meristem
CB:Z:TCGTTCGCAATGATGA-pool21	1014	347	451	0	566	2.75282	0.342209	0.444773	0	1014	10x	tenx_B73	B73	NA	2.29815	1.63684	0.1	singlet	4	Ground_meristem
CB:Z:TCAAGACAGATTGACA-pool21	83892	27354	31386	0	40993	4.61271	0.326062	0.374124	0	83892	10x	tenx_B73	B73	NA	4.55439	-1.78319	0.188462	singlet	13	Bundle_sheath
CB:Z:GGTGTCGGTGGTACTT-pool21	1402	337	318	0	784	2.89432	0.240371	0.226819	0	1402	10x	tenx_B73	B73	NA	-1.69203	2.33382	0.0519231	singlet	12	Epidermis
CB:Z:CCCTAGTGTTATCGAC-pool21	61423	21039	29408	2	29828	4.47462	0.342526	0.478778	3.25611e-05	61423	10x	tenx_B73	B73	NA	-1.11287	5.35106	0.0596154	singlet	9	Vascular_parenchyma_precursor
CB:Z:TGCATTTCAACTCAAC-pool21	6222	1877	2140	0	3416	3.53352	0.301671	0.343941	0	6222	10x	tenx_B73	B73	NA	4.78912	-2.02553	0.132692	singlet	13	Bundle_sheath
CB:Z:CCCTAGTAGAGGCAGG-pool21	7200	2611	3693	0	3827	3.58286	0.362639	0.512917	0	7200	10x	tenx_B73	B73	NA	2.54175	-0.786425	0.0788462	singlet	11	Mesophyll
CB:Z:CCCTAGTAGCTAGCAG-pool21	1880	585	674	2	1087	3.03623	0.31117	0.358511	0.00106383	1880	10x	tenx_B73	B73	NA	-0.982349	4.02823	0.0346154	singlet	9	Vascular_parenchyma_precursor
CB:Z:ATAGTCGTCCCGGGTA-pool21	31123	9407	13162	0	16438	4.21585	0.302252	0.422903	0	31123	10x	tenx_B73	B73	NA	-2.16149	3.25859	0.0961538	singlet	11	Mesophyll
CB:Z:ATCCTCGTCTCAGATG-pool21	17434	6616	9455	0	9134	3.96066	0.379488	0.542331	0	17434	10x	tenx_B73	B73	NA	-2.11745	5.23526	0.0865385	singlet	9	Vascular_parenchyma_precursor
CB:Z:CAGGGCTAGAGCCTGA-pool21	28736	11016	15496	0	14494	4.16119	0.383352	0.539254	0	28736	10x	tenx_B73	B73	NA	-2.11579	5.2195	0.113462	singlet	9	Vascular_parenchyma_precursor
CB:Z:GAGCGCTAGACTCTTG-pool21	33435	12923	17766	0	16705	4.22285	0.386511	0.531359	0	33435	10x	tenx_B73	B73	NA	-2.06819	5.25765	0.134615	singlet	9	Vascular_parenchyma_precursor
CB:Z:GCATTGATCCTTTGAT-pool21	22498	8542	12266	0	11497	4.06058	0.379678	0.545204	0	22498	10x	tenx_B73	B73	NA	-2.09502	5.24493	0.0730769	singlet	9	Vascular_parenchyma_precursor
CB:Z:TTCTGTAAGTAACACA-pool21	14723	5420	8042	0	7812	3.89276	0.368131	0.54622	0	14723	10x	tenx_B73	B73	NA	-2.13624	5.19647	0.157692	singlet	9	Vascular_parenchyma_precursor
CB:Z:GTCGTAACATCCCAAA-pool21	23863	6372	7652	2	12692	4.10353	0.267024	0.320664	8.38118e-05	23863	10x	tenx_B73	B73	NA	-1.68105	2.01894	0.175	singlet	5	Ground_meristem
CB:Z:CGTAAACTCCATAGGT-pool21	18369	5566	6777	0	9849	3.99339	0.303011	0.368937	0	18369	10x	tenx_B73	B73	NA	-1.63304	5.14636	0.132692	singlet	9	Vascular_parenchyma_precursor
CB:Z:TGATGCAGTCGCTAGC-pool21	123112	34066	35172	0	59608	4.7753	0.276707	0.285691	0	123112	10x	tenx_B73	B73	NA	0.470477	1.62574	0.163462	singlet	1	Protoderm
CB:Z:TGGCAATTCACTGGTA-pool21	117662	31038	35294	8	59406	4.77383	0.263789	0.299961	6.79914e-05	117662	10x	tenx_B73	B73	NA	0.609991	0.988188	0.146154	singlet	1	Protoderm
CB:Z:ACATGCACAACGTCCG-pool21	77182	26069	38300	0	36098	4.55748	0.33776	0.49623	0	77182	10x	tenx_B73	B73	NA	4.22387	-1.764	0.117308	singlet	5	Ground_meristem
CB:Z:GCATTCCTCAGATACC-pool21	2312	641	666	0	1354	3.13162	0.277249	0.288062	0	2312	10x	tenx_B73	B73	NA	2.21896	4.25927	0.0307692	singlet	3	Axillary_meristem
CB:Z:TGTGGCGTCGCTATTT-pool21	15282	3606	4743	6	8152	3.91126	0.235964	0.310365	0.000392619	15282	10x	tenx_B73	B73	NA	0.885893	-0.375256	0.0730769	singlet	5	Ground_meristem
CB:Z:TGGGTTAAGACTCGGA-pool21	58486	16237	20999	2	29495	4.46975	0.277622	0.359043	3.41962e-05	58486	10x	tenx_B73	B73	NA	0.848093	0.324638	0.192308	singlet	5	Ground_meristem
CB:Z:ACGTTAGGTAGTCTGT-pool21	30916	7840	8708	0	16768	4.22448	0.25359	0.281666	0	30916	10x	tenx_B73	B73	NA	-2.25995	2.60558	0.105769	singlet	12	Epidermis
CB:Z:AGCCAGCAGTGTTCCA-pool21	1412	377	368	2	803	2.90472	0.266997	0.260623	0.00141643	1412	10x	tenx_B73	B73	NA	2.18663	-1.24211	0.0711538	singlet	2	Bundle_sheath
CB:Z:CACAACACAGCTGATT-pool21	6571	2318	2672	0	3743	3.57322	0.352762	0.406635	0	6571	10x	tenx_B73	B73	NA	5.10838	-1.93633	0.134615	singlet	13	Bundle_sheath
CB:Z:CACAACACATCAGCTA-pool21	1738	586	577	0	1021	3.00903	0.337169	0.331991	0	1738	10x	tenx_B73	B73	NA	5.08358	-1.88778	0.107692	singlet	13	Bundle_sheath
CB:Z:GCCCGAATCATTCTTG-pool21	37671	8844	11083	0	19463	4.28921	0.234769	0.294205	0	37671	10x	tenx_B73	B73	NA	0.944183	0.583343	0.169231	singlet	5	Ground_meristem
CB:Z:ATCCTCGAGTGTCGGA-pool21	111213	37913	46153	0	52328	4.71873	0.340904	0.414996	0	111213	10x	tenx_B73	B73	NA	-0.19333	2.7237	0.0730769	singlet	1	Protoderm
CB:Z:CCTGGGAGTGATAACA-pool21	60266	16332	20168	2	31199	4.49414	0.270999	0.33465	3.31862e-05	60266	10x	tenx_B73	B73	NA	0.744383	-0.145878	0.0903846	singlet	5	Ground_meristem
CB:Z:TAAGCCACAATGGCTT-pool21	46822	11211	12961	2	24849	4.39531	0.239439	0.276814	4.2715e-05	46822	10x	tenx_B73	B73	NA	1.18855	0.357428	0.182692	singlet	5	Ground_meristem
CB:Z:GTGGCGTGTAGCGAGT-pool21	31278	9679	11421	0	16429	4.21561	0.309451	0.365145	0	31278	10x	tenx_B73	B73	NA	2.08629	-0.332091	0.123077	singlet	11	Mesophyll
CB:Z:TTGCGGGTCATTCGGA-pool21	92826	24856	30046	2	47029	4.67237	0.26777	0.323681	2.15457e-05	92826	10x	tenx_B73	B73	NA	0.810853	0.702747	0.111538	singlet	5	Ground_meristem
CB:Z:ACGGATTAGAATATCG-pool21	1823	385	465	0	1018	3.00775	0.21119	0.255074	0	1823	10x	tenx_B73	B73	NA	0.378857	1.29284	0.153846	singlet	9	Vascular_parenchyma_precursor
CB:Z:GTAGTACTCTGAGTAC-pool21	45598	16135	22529	2	21882	4.34009	0.353853	0.494079	4.38616e-05	45598	10x	tenx_B73	B73	NA	1.07288	0.057617	0.188462	singlet	5	Ground_meristem
CB:Z:TTTACGTTCGTGTGCG-pool21	83194	29342	36237	0	39385	4.59533	0.352694	0.435572	0	83194	10x	tenx_B73	B73	NA	2.35475	0.208116	0.126923	singlet	11	Mesophyll
CB:Z:TCAAGGTCACAAGGGT-pool21	108474	34049	43352	2	51595	4.71261	0.313891	0.399653	1.84376e-05	108474	10x	tenx_B73	B73	NA	4.23842	-1.80683	0.119231	singlet	13	Bundle_sheath
CB:Z:GAAATGAAGCGGACAT-pool21	6023	2550	3694	0	3181	3.50256	0.423377	0.613316	0	6023	10x	tenx_B73	B73	NA	-1.42791	-1.54095	0.1	singlet	4	Ground_meristem
CB:Z:TCACAAGTCTCATCCG-pool21	15755	4093	4477	0	8478	3.92829	0.259791	0.284164	0	15755	10x	tenx_B73	B73	NA	-3.50161	3.15956	0.123077	singlet	10	Xylem
CB:Z:GGTCATAAGCGAATAT-pool21	6172	1963	1560	0	3191	3.50393	0.318049	0.252754	0	6172	10x	tenx_B73	B73	NA	2.78247	2.49096	0.0788462	singlet	6	Vascular_parenchyma
CB:Z:GTGACATGTAGCCATT-pool21	34908	9364	11408	0	18015	4.25563	0.268248	0.326802	0	34908	10x	tenx_B73	B73	NA	3.21167	1.9124	0.190385	singlet	6	Vascular_parenchyma
CB:Z:AACCAACAGATTGACA-pool21	104671	36987	45090	0	47503	4.67672	0.353364	0.430778	0	104671	10x	tenx_B73	B73	NA	-1.13421	5.33409	0.128846	singlet	9	Vascular_parenchyma_precursor
CB:Z:TTTGGTTCACCCTTAC-pool21	2267	963	1225	0	1224	3.08778	0.42479	0.540362	0	2267	10x	tenx_B73	B73	NA	-2.2155	-1.8265	0.0846154	singlet	4	Ground_meristem
CB:Z:TCGCAGGCACTCGGAC-pool21	3429	1357	1838	0	1957	3.29159	0.395742	0.536016	0	3429	10x	tenx_B73	B73	NA	-2.44472	1.15111	0.144231	singlet	4	Ground_meristem
CB:Z:AGCCTGGTCGCAGATT-pool21	16063	4151	5114	4	8462	3.92747	0.25842	0.318371	0.000249019	16063	10x	tenx_B73	B73	NA	-2.21882	2.83484	0.161538	singlet	12	Epidermis
CB:Z:CTTTGCGCAGGTGTCC-pool21	18839	4863	6272	2	9953	3.99795	0.258135	0.332926	0.000106163	18839	10x	tenx_B73	B73	NA	1.78628	0.179446	0.178846	singlet	11	Mesophyll
CB:Z:TGTACAGAGGAAACTT-pool21	2664	825	965	0	1578	3.19811	0.309685	0.362237	0	2664	10x	tenx_B73	B73	NA	1.81871	4.73933	0.0480769	singlet	3	Axillary_meristem
CB:Z:GCGATTACAGACCTGC-pool21	51931	18341	24159	0	24737	4.39335	0.35318	0.465213	0	51931	10x	tenx_B73	B73	NA	-2.00082	5.18009	0.153846	singlet	9	Vascular_parenchyma_precursor
CB:Z:CTGGCAGCACATTCTT-pool21	48091	13795	17103	2	24632	4.3915	0.286852	0.355638	4.15878e-05	48091	10x	tenx_B73	B73	NA	1.96373	0.158434	0.146154	singlet	11	Mesophyll
CB:Z:TGGGTTAAGTCTCGAT-pool21	3227	957	1314	0	1764	3.2465	0.29656	0.407189	0	3227	10x	tenx_B73	B73	NA	2.97809	-1.66645	0.0769231	singlet	11	Mesophyll
CB:Z:GTTACGACACCGTCTT-pool21	115107	33198	38765	2	56682	4.75345	0.28841	0.336774	1.73751e-05	115107	10x	tenx_B73	B73	NA	0.34989	1.43336	0.175	singlet	1	Protoderm
CB:Z:TACCCTGTCGATGTGT-pool21	34481	12552	17909	0	16591	4.21987	0.364027	0.519387	0	34481	10x	tenx_B73	B73	NA	3.18406	-0.0922471	0.109615	singlet	11	Mesophyll
CB:Z:AACAAAGCACAAACGG-pool21	107449	35023	48691	6	49968	4.69869	0.32595	0.453155	5.58404e-05	107449	10x	tenx_B73	B73	NA	0.419913	1.45012	0.169231	singlet	1	Protoderm
CB:Z:CTGGGACCAATGTGCT-pool21	21067	4940	5426	0	11777	4.07103	0.23449	0.257559	0	21067	10x	tenx_B73	B73	NA	1.03187	0.641823	0.157692	singlet	5	Ground_meristem
CB:Z:CAAGCTAAGGGTTCTT-pool21	165411	46332	43769	2	85161	4.93024	0.280102	0.264608	1.20911e-05	165411	10x	tenx_B73	B73	NA	-0.407726	2.66897	0.175	singlet	1	Protoderm
CB:Z:GGACACCTCGATTACG-pool21	6874	1436	1827	2	3833	3.58354	0.208903	0.265784	0.000290951	6874	10x	tenx_B73	B73	NA	1.08775	0.417948	0.163462	singlet	5	Ground_meristem
CB:Z:GTTATTCGTATTCACG-pool21	7572	1799	2292	0	4102	3.613	0.237586	0.302694	0	7572	10x	tenx_B73	B73	NA	0.850404	0.431786	0.171154	singlet	5	Ground_meristem
CB:Z:TTACCCGAGGCTAAAT-pool21	11198	3196	3784	0	6015	3.77924	0.285408	0.337917	0	11198	10x	tenx_B73	B73	NA	2.39816	-0.110607	0.109615	singlet	11	Mesophyll
CB:Z:GCAGCTGTCCTTCGAC-pool21	5766	1477	1650	0	3164	3.50024	0.256157	0.28616	0	5766	10x	tenx_B73	B73	NA	2.54726	0.00573766	0.105769	singlet	11	Mesophyll
CB:Z:TAACTTCAGCCCATTA-pool21	191864	61010	66250	0	90185	4.95513	0.317986	0.345297	0	191864	10x	tenx_B73	B73	NA	-0.384502	2.44482	0.161538	singlet	1	Protoderm
CB:Z:GTAGGAGAGAGGAATG-pool21	1994	587	649	0	1167	3.06707	0.294383	0.325476	0	1994	10x	tenx_B73	B73	NA	-3.76711	2.78647	0.157692	singlet	10	Xylem
CB:Z:GAAATGACACACATTG-pool21	42441	13997	17229	2	21129	4.32488	0.329799	0.405952	4.71242e-05	42441	10x	tenx_B73	B73	NA	0.834027	0.391424	0.180769	singlet	5	Ground_meristem
CB:Z:TTACCCGAGGGAAGCG-pool21	99724	32929	41508	6	47425	4.67601	0.330201	0.416229	6.01661e-05	99724	10x	tenx_B73	B73	NA	-0.397691	2.53383	0.163462	singlet	1	Protoderm
CB:Z:CATGCCTCATACCCGG-pool21	53682	20891	30223	2	25517	4.40683	0.389162	0.563001	3.72564e-05	53682	10x	tenx_B73	B73	NA	-1.64727	5.61433	0.171154	singlet	9	Vascular_parenchyma_precursor
CB:Z:AATGGCTCAGCCGAAA-pool21	3775	893	1178	2	2106	3.32346	0.236556	0.312053	0.000529801	3775	10x	tenx_B73	B73	NA	1.14558	0.559242	0.192308	singlet	5	Ground_meristem
CB:Z:CTTAATCAGAGTTTGA-pool21	16794	5176	7394	4	8638	3.93641	0.308205	0.440276	0.00023818	16794	10x	tenx_B73	B73	NA	1.73304	0.1687	0.192308	singlet	11	Mesophyll
CB:Z:TCACAGACATCCGTAA-pool21	26943	7792	10236	0	13829	4.14079	0.289203	0.379913	0	26943	10x	tenx_B73	B73	NA	2.74517	-0.377035	0.130769	singlet	11	Mesophyll
CB:Z:CTCAGCTTCGCGCCAA-pool21	17994	6414	8040	0	10443	4.01883	0.356452	0.446816	0	17994	10x	tenx_B73	B73	NA	2.22284	5.79794	0.15	singlet	3	Axillary_meristem
CB:Z:TTGTTCAAGCGATACG-pool21	45243	14301	18455	0	22726	4.35652	0.316093	0.407908	0	45243	10x	tenx_B73	B73	NA	2.64128	-0.0270651	0.142308	singlet	11	Mesophyll
CB:Z:ACTACCCCAGTCCTGG-pool21	4614	1884	2660	0	2484	3.39515	0.408322	0.576506	0	4614	10x	tenx_B73	B73	NA	-0.905534	-3.38837	0.178846	singlet	2	Bundle_sheath
CB:Z:TGTGGCGAGTACCCAT-pool21	49357	11135	11251	4	26723	4.42689	0.225601	0.227951	8.10422e-05	49357	10x	tenx_B73	B73	NA	0.721473	0.626142	0.136538	singlet	5	Ground_meristem
CB:Z:AGTTTGGTCGATCTTT-pool21	53286	15052	17612	0	27807	4.44415	0.282476	0.330518	0	53286	10x	tenx_B73	B73	NA	2.49539	-0.0491189	0.1	singlet	11	Mesophyll
CB:Z:ACTACGAAGGATTGCG-pool21	2343	651	595	0	1403	3.14706	0.277849	0.253948	0	2343	10x	tenx_B73	B73	NA	2.88626	-0.144603	0.0903846	singlet	11	Mesophyll
CB:Z:GTGATCAGTACGGAGT-pool21	4789	1722	2523	0	2614	3.41731	0.359574	0.526832	0	4789	10x	tenx_B73	B73	NA	-1.32441	-1.70195	0.175	singlet	4	Ground_meristem
CB:Z:AGATAGAAGGTTACAA-pool21	370933	116948	129344	2	164804	5.21697	0.315281	0.348699	5.39181e-06	370933	10x	tenx_B73	B73	NA	0.114501	2.21336	0.153846	singlet	1	Protoderm
CB:Z:TGCATTTCAAAGAAGG-pool21	75055	20810	25524	2	38117	4.58112	0.277263	0.340071	2.66471e-05	75055	10x	tenx_B73	B73	NA	0.984237	0.417713	0.103846	singlet	5	Ground_meristem
CB:Z:TCCAGAACACCTGAAT-pool21	1146	243	239	0	642	2.80754	0.212042	0.208551	0	1146	10x	tenx_B73	B73	NA	-0.763941	1.93614	0.176923	singlet	1	Protoderm
CB:Z:TTGTTGTCAATCCATG-pool21	105333	30242	33706	0	53226	4.72612	0.287109	0.319995	0	105333	10x	tenx_B73	B73	NA	4.6295	-1.53636	0.180769	singlet	13	Bundle_sheath
CB:Z:TTACGTTGTGAATCAA-pool21	66436	16197	18613	0	35990	4.55618	0.243799	0.280164	0	66436	10x	tenx_B73	B73	NA	4.48323	-2.00175	0.190385	singlet	13	Bundle_sheath
CB:Z:GGGTCTGTCTGATCCC-pool21	61761	26955	35374	0	27359	4.4371	0.43644	0.572756	0	61761	10x	tenx_B73	B73	NA	-1.65631	5.39492	0.0865385	singlet	9	Vascular_parenchyma_precursor
CB:Z:ACAAGCTGTTGGACGA-pool21	11708	3256	4018	0	6223	3.794	0.2781	0.343184	0	11708	10x	tenx_B73	B73	NA	2.03296	0.183576	0.0884615	singlet	11	Mesophyll
CB:Z:TTCGTTACATAGCCGC-pool21	3987	806	1096	0	2195	3.34143	0.202157	0.274893	0	3987	10x	tenx_B73	B73	NA	1.02344	0.487949	0.126923	singlet	5	Ground_meristem
CB:Z:CAGCTAACAATGCACT-pool21	17428	6500	8652	0	9898	3.99555	0.372963	0.496443	0	17428	10x	tenx_B73	B73	NA	2.254	5.6786	0.138462	singlet	3	Axillary_meristem
CB:Z:CCGTGAGTCCGTTTCG-pool21	12356	3198	3336	0	7081	3.85009	0.258822	0.26999	0	12356	10x	tenx_B73	B73	NA	-1.87645	5.04217	0.15	singlet	9	Vascular_parenchyma_precursor
CB:Z:TTACGTTGTCGCTAGC-pool21	1979	471	541	0	1177	3.07078	0.237999	0.27337	0	1979	10x	tenx_B73	B73	NA	5.05887	-1.91565	0.0807692	singlet	13	Bundle_sheath
CB:Z:TCGCCTAAGGGAGTTC-pool21	241767	68068	70485	0	117520	5.07011	0.281544	0.291541	0	241767	10x	tenx_B73	B73	NA	0.106808	2.31218	0.194231	singlet	1	Protoderm
CB:Z:TCGAGCGCAATTGCCA-pool21	29843	7840	8791	2	15745	4.19714	0.262708	0.294575	6.70174e-05	29843	10x	tenx_B73	B73	NA	2.42967	0.00509846	0.113462	singlet	11	Mesophyll
CB:Z:GAAACAATCTACATCT-pool21	51950	18285	23911	2	28201	4.45026	0.351973	0.460269	3.84986e-05	51950	10x	tenx_B73	B73	NA	2.13098	5.80186	0.0884615	singlet	3	Axillary_meristem
CB:Z:AGGCGTCGTCCAAGAG-pool21	23664	7315	8326	0	12270	4.08884	0.309119	0.351842	0	23664	10x	tenx_B73	B73	NA	3.04226	1.4378	0.148077	singlet	5	Ground_meristem
CB:Z:ACGTGGCTCGCCTTAC-pool21	43534	15508	17361	2	20991	4.32203	0.356227	0.398792	4.59411e-05	43534	10x	tenx_B73	B73	NA	-1.60071	5.2482	0.123077	singlet	9	Vascular_parenchyma_precursor
CB:Z:GAGCGCTTCAAGAGAT-pool21	13668	4924	6696	2	7765	3.89014	0.360258	0.489903	0.000146327	13668	10x	tenx_B73	B73	NA	-0.656808	4.72607	0.0980769	singlet	9	Vascular_parenchyma_precursor
CB:Z:GTCACGGGTCATAGCT-pool21	26059	8114	9949	0	13393	4.12688	0.31137	0.381787	0	26059	10x	tenx_B73	B73	NA	1.70746	0.21945	0.138462	singlet	11	Mesophyll
CB:Z:GGGTCTGTCGAGGCTC-pool21	19839	4459	4372	0	11440	4.05843	0.224759	0.220374	0	19839	10x	tenx_B73	B73	NA	-0.36099	1.80793	0.148077	singlet	1	Protoderm
CB:Z:CTCTACGCACGCTAAT-pool21	14792	6063	8793	0	7915	3.89845	0.409884	0.594443	0	14792	10x	tenx_B73	B73	NA	-1.54575	-1.32942	0.161538	singlet	4	Ground_meristem
CB:Z:AACCTGAGTACGGAGT-pool21	16888	3584	4018	0	9114	3.95971	0.212222	0.23792	0	16888	10x	tenx_B73	B73	NA	-1.64285	1.61279	0.167308	singlet	5	Ground_meristem
CB:Z:GCTTTCGTCTCTGCGT-pool21	9629	3064	4082	0	5125	3.70969	0.318205	0.423928	0	9629	10x	tenx_B73	B73	NA	2.95756	-1.89663	0.130769	singlet	2	Bundle_sheath
CB:Z:GAGGCTCTCTTCAGAG-pool21	39645	12618	17489	0	19578	4.29177	0.318275	0.44114	0	39645	10x	tenx_B73	B73	NA	2.84285	-0.0515802	0.146154	singlet	11	Mesophyll
CB:Z:GAACCGCCAGGAGCAT-pool21	4421	1486	1802	0	2540	3.40483	0.336123	0.4076	0	4421	10x	tenx_B73	B73	NA	-1.97939	5.24003	0.0923077	singlet	9	Vascular_parenchyma_precursor
CB:Z:TGTACAGAGACCCATT-pool21	98149	35641	50531	4	44173	4.64516	0.363132	0.51484	4.07544e-05	98149	10x	tenx_B73	B73	NA	-0.408198	2.70735	0.0923077	singlet	1	Protoderm
CB:Z:TTTGGCCAGCGTGTTT-pool21	73489	25465	31940	2	36312	4.56005	0.346514	0.434623	2.7215e-05	73489	10x	tenx_B73	B73	NA	0.736873	0.670471	0.123077	singlet	5	Ground_meristem
CB:Z:GGGACCTGTAGCCATT-pool21	12358	3504	4272	2	6565	3.81723	0.283541	0.345687	0.000161838	12358	10x	tenx_B73	B73	NA	2.80076	-0.452932	0.0884615	singlet	11	Mesophyll
CB:Z:GGGACCTGTATCACAC-pool21	1829	570	724	0	987	2.99432	0.311646	0.395845	0	1829	10x	tenx_B73	B73	NA	1.91619	-1.17099	0.05	singlet	11	Mesophyll
CB:Z:GGGACCTGTCGCGCTA-pool21	1504	467	570	0	834	2.92117	0.310505	0.378989	0	1504	10x	tenx_B73	B73	NA	2.54107	-0.490804	0.0673077	singlet	11	Mesophyll
CB:Z:TTGTTCAGTTGGCGAA-pool21	68843	18892	23373	0	34508	4.53792	0.274422	0.339512	0	68843	10x	tenx_B73	B73	NA	0.953646	0.685583	0.109615	singlet	5	Ground_meristem
CB:Z:TAAACCGTCGCAAACT-pool21	58523	21051	27726	0	28163	4.44968	0.359705	0.473762	0	58523	10x	tenx_B73	B73	NA	-1.79656	5.30352	0.0980769	singlet	9	Vascular_parenchyma_precursor
CB:Z:TCTCTGGAGAGGTGGG-pool21	10311	4011	6081	0	5286	3.72313	0.389002	0.589759	0	10311	10x	tenx_B73	B73	NA	3.14321	-0.380547	0.0634615	singlet	11	Mesophyll
CB:Z:CAGTGTAGTCTGGGCT-pool21	167665	62126	78212	4	72022	4.85747	0.370536	0.466478	2.38571e-05	167665	10x	tenx_B73	B73	NA	0.0273346	2.52194	0.115385	singlet	1	Protoderm
CB:Z:CTAGCGGCATCATCGA-pool21	7825	1968	2780	0	4208	3.62408	0.251502	0.355272	0	7825	10x	tenx_B73	B73	NA	1.07079	0.278493	0.165385	singlet	5	Ground_meristem
CB:Z:GCATTCCCAGGTAACG-pool21	6849	2356	3356	0	3920	3.59329	0.343992	0.489999	0	6849	10x	tenx_B73	B73	NA	-1.08112	-1.99533	0.113462	singlet	7	Ground_meristem
CB:Z:TTGAGCAAGTGTGTAA-pool21	173735	42156	38979	2	92051	4.96403	0.242645	0.224359	1.15118e-05	173735	10x	tenx_B73	B73	NA	-0.225963	2.13586	0.157692	singlet	1	Protoderm
CB:Z:AACAGTCGTATCCCTC-pool21	162518	57557	75272	12	71556	4.85465	0.354158	0.463161	7.3838e-05	162518	10x	tenx_B73	B73	NA	-0.0354239	2.53287	0.175	singlet	1	Protoderm
CB:Z:GGCACGTAGGCATGCA-pool21	42084	11773	12887	0	23142	4.3644	0.27975	0.306221	0	42084	10x	tenx_B73	B73	NA	-0.42761	-5.58223	0.146154	singlet	4	Ground_meristem
CB:Z:TAGGTGTCACACATGT-pool21	71233	22342	28119	4	34897	4.54279	0.313647	0.394747	5.61537e-05	71233	10x	tenx_B73	B73	NA	-1.90868	5.07797	0.146154	singlet	9	Vascular_parenchyma_precursor
CB:Z:TGAATCGTCGTGATAC-pool21	21976	8300	11264	2	12235	4.0876	0.377685	0.512559	9.10084e-05	21976	10x	tenx_B73	B73	NA	2.23812	5.77105	0.107692	singlet	3	Axillary_meristem
CB:Z:ACTGCGGAGCTGCCAC-pool21	33361	8921	9607	0	17939	4.2538	0.267408	0.287971	0	33361	10x	tenx_B73	B73	NA	2.19425	0.169449	0.115385	singlet	11	Mesophyll
CB:Z:ACATGGTCAGAGAGAA-pool21	113360	42307	54302	6	51187	4.70916	0.373209	0.479023	5.29287e-05	113360	10x	tenx_B73	B73	NA	-1.14694	5.25123	0.153846	singlet	1	Protoderm
CB:Z:CAGCTGGTCCTTCGAC-pool21	113650	35435	46595	8	53770	4.73054	0.311791	0.409987	7.03916e-05	113650	10x	tenx_B73	B73	NA	0.399599	1.72204	0.165385	singlet	1	Protoderm
CB:Z:ACGGATTAGTTTGGAA-pool21	14649	4143	4924	0	7762	3.88997	0.282818	0.336132	0	14649	10x	tenx_B73	B73	NA	1.5386	0.145354	0.0923077	singlet	5	Ground_meristem
CB:Z:TAACAGCGTACGTATC-pool21	25995	6945	8863	0	13597	4.13344	0.267167	0.34095	0	25995	10x	tenx_B73	B73	NA	4.14507	-1.71432	0.0769231	singlet	13	Bundle_sheath
CB:Z:TAACAGCGTTTGTCTT-pool21	1244	331	420	0	677	2.83059	0.266077	0.337621	0	1244	10x	tenx_B73	B73	NA	4.0444	-1.52229	0.0903846	singlet	13	Bundle_sheath
CB:Z:AGGCGAAAGACGCCAA-pool21	8057	3279	5055	2	4224	3.62572	0.406975	0.627405	0.000248231	8057	10x	tenx_B73	B73	NA	1.88984	-1.17684	0.121154	singlet	7	Ground_meristem
CB:Z:TATCGAGAGACGCCAA-pool21	15796	6278	9748	2	7942	3.89993	0.397442	0.617118	0.000126614	15796	10x	tenx_B73	B73	NA	1.83166	-1.13619	0.121154	singlet	7	Ground_meristem
CB:Z:ACCGGGTTCTTATCAC-pool21	81397	23064	27536	0	41940	4.62263	0.283352	0.338293	0	81397	10x	tenx_B73	B73	NA	0.767665	1.05906	0.148077	singlet	1	Protoderm
CB:Z:CCACGTTCAGTTAAAG-pool21	1754	625	833	0	1031	3.01326	0.356328	0.474914	0	1754	10x	tenx_B73	B73	NA	4.21319	-0.61067	0.0923077	singlet	13	Bundle_sheath
CB:Z:ACCTGCTAGAGTGGAA-pool21	10100	3442	4039	0	5811	3.76425	0.340792	0.399901	0	10100	10x	tenx_B73	B73	NA	4.2072	-0.761703	0.0807692	singlet	11	Mesophyll
CB:Z:TCCAGAACAGTTAAAG-pool21	50643	18401	23998	0	25831	4.41214	0.363347	0.473866	0	50643	10x	tenx_B73	B73	NA	4.50844	-0.676181	0.126923	singlet	13	Bundle_sheath
CB:Z:CCCTGATCACCTATTT-pool21	71454	24763	33123	0	34106	4.53283	0.346559	0.463557	0	71454	10x	tenx_B73	B73	NA	2.35115	0.0905111	0.148077	singlet	11	Mesophyll
CB:Z:TCTCTGGAGACTAGGC-pool21	120953	38113	49430	8	56938	4.7554	0.315106	0.408671	6.61414e-05	120953	10x	tenx_B73	B73	NA	0.193474	1.83634	0.178846	singlet	1	Protoderm
CB:Z:GCGCCAACAAGGGTAC-pool21	11500	4443	6166	0	6390	3.8055	0.386348	0.536174	0	11500	10x	tenx_B73	B73	NA	-1.17919	4.13603	0.151923	singlet	9	Vascular_parenchyma_precursor
CB:Z:GGTGCTGGTGCATTGT-pool21	27773	8609	12070	4	14069	4.14826	0.309977	0.434595	0.000144025	27773	10x	tenx_B73	B73	NA	0.915974	-0.144794	0.142308	singlet	5	Ground_meristem
CB:Z:CTCTAGCGTACGGAGT-pool21	1774	482	594	0	998	2.99913	0.271702	0.334837	0	1774	10x	tenx_B73	B73	NA	2.32238	-1.50851	0.117308	singlet	2	Bundle_sheath
CB:Z:CCTTAATTCTTCTTCC-pool21	60546	21505	30208	4	29052	4.46318	0.355184	0.498926	6.60655e-05	60546	10x	tenx_B73	B73	NA	2.92226	-0.373834	0.161538	singlet	11	Mesophyll
CB:Z:GTTGGTAAGGTTCGAG-pool21	12057	3865	4316	0	7007	3.84553	0.320561	0.357966	0	12057	10x	tenx_B73	B73	NA	2.76653	-2.0891	0.0826923	singlet	2	Bundle_sheath
CB:Z:AAAGGGCGTCGTAGTT-pool21	55679	16334	18142	2	27888	4.44542	0.29336	0.325832	3.59202e-05	55679	10x	tenx_B73	B73	NA	4.48448	-2.00492	0.165385	singlet	13	Bundle_sheath
CB:Z:CAGGATTCAGGTGTCC-pool21	1359	363	473	0	736	2.86688	0.267108	0.34805	0	1359	10x	tenx_B73	B73	NA	-0.115823	-4.66686	0.121154	singlet	6	Vascular_parenchyma
CB:Z:CGTGGCAAGTGAGCAC-pool21	17942	5486	7951	0	8807	3.94483	0.305763	0.44315	0	17942	10x	tenx_B73	B73	NA	-1.52294	5.68097	0.117308	singlet	9	Vascular_parenchyma_precursor
CB:Z:TCAGCTCCATTGCCTC-pool21	3972	1521	2112	0	2326	3.36661	0.382931	0.531722	0	3972	10x	tenx_B73	B73	NA	-0.898721	-1.79563	0.142308	singlet	7	Ground_meristem
CB:Z:TGCCTGTAGTGCCCTG-pool21	96424	21116	20540	0	52310	4.71858	0.218991	0.213018	0	96424	10x	tenx_B73	B73	NA	0.079164	2.0073	0.15	singlet	1	Protoderm
CB:Z:TTACCGCAGAGACTCG-pool21	49096	12301	14411	4	24950	4.39707	0.25055	0.293527	8.1473e-05	49096	10x	tenx_B73	B73	NA	1.26855	0.382635	0.161538	singlet	5	Ground_meristem
CB:Z:GAACCTAGTACGAGAC-pool21	89393	19856	19615	0	48669	4.68725	0.22212	0.219424	0	89393	10x	tenx_B73	B73	NA	0.632241	2.50444	0.0903846	singlet	1	Protoderm
CB:Z:GCGATCGCATTGCACA-pool21	17254	5616	7611	0	9004	3.95444	0.32549	0.441115	0	17254	10x	tenx_B73	B73	NA	2.4549	-0.684435	0.103846	singlet	11	Mesophyll
CB:Z:GATCATGGTTTCAGCA-pool21	169928	57429	76540	0	74966	4.87486	0.337961	0.450426	0	169928	10x	tenx_B73	B73	NA	0.299368	1.63399	0.155769	singlet	1	Protoderm
CB:Z:GCAGCCACATGGGTGA-pool21	6055	1301	1460	4	3344	3.52427	0.214864	0.241123	0.000660611	6055	10x	tenx_B73	B73	NA	0.948502	0.362971	0.025	singlet	5	Ground_meristem
CB:Z:TGCCTGTGTAGCCATT-pool21	97058	31175	34728	0	48415	4.68498	0.3212	0.357807	0	97058	10x	tenx_B73	B73	NA	0.503491	1.65264	0.175	singlet	1	Protoderm
CB:Z:GCAAAGGTCGATTACG-pool21	1137	310	336	0	650	2.81291	0.272647	0.295515	0	1137	10x	tenx_B73	B73	NA	4.56894	-0.528311	0.0884615	singlet	13	Bundle_sheath
CB:Z:CTACAGAGTCAGAAGC-pool21	24663	8556	11067	0	12459	4.09548	0.346916	0.448729	0	24663	10x	tenx_B73	B73	NA	2.8027	0.00398633	0.0942308	singlet	11	Mesophyll
CB:Z:CTGTATTGTTCTTTGT-pool21	1588	355	379	0	911	2.95952	0.223552	0.238665	0	1588	10x	tenx_B73	B73	NA	-1.18334	1.99559	0.0846154	singlet	4	Ground_meristem
CB:Z:TTGCGAAGTCCGTAGC-pool21	61424	18895	24103	2	30282	4.48118	0.307616	0.392404	3.25606e-05	61424	10x	tenx_B73	B73	NA	2.10916	0.194194	0.176923	singlet	11	Mesophyll
CB:Z:ATCCTCGGTAGAAAGG-pool21	18743	3971	5147	0	10030	4.0013	0.211866	0.274609	0	18743	10x	tenx_B73	B73	NA	1.05947	0.532831	0.123077	singlet	5	Ground_meristem
CB:Z:GGTGCTGTCTTTGCAT-pool21	14876	4053	5074	0	7971	3.90151	0.272452	0.341086	0	14876	10x	tenx_B73	B73	NA	2.5726	-0.184319	0.0942308	singlet	11	Mesophyll
CB:Z:AGCCCGATCCACCTAC-pool21	56640	14417	15986	0	29820	4.47451	0.254537	0.282239	0	56640	10x	tenx_B73	B73	NA	-1.18105	5.38981	0.103846	singlet	9	Vascular_parenchyma_precursor
CB:Z:AAACTGCGTAATGCAA-pool21	34155	11267	15325	4	17023	4.23104	0.329878	0.44869	0.000117113	34155	10x	tenx_B73	B73	NA	2.11925	-0.078706	0.180769	singlet	11	Mesophyll
CB:Z:GGTGAAGCAGAGAGAA-pool21	15666	4317	4910	4	9114	3.95971	0.275565	0.313418	0.00025533	15666	10x	tenx_B73	B73	NA	-0.962876	4.33052	0.0576923	singlet	9	Vascular_parenchyma_precursor
CB:Z:GTCACGGAGAGCACTG-pool21	1038	222	218	0	614	2.78817	0.213873	0.210019	0	1038	10x	tenx_B73	B73	NA	-1.06783	-1.47579	0.0923077	singlet	7	Ground_meristem
CB:Z:GGGTCTGGTTGCTTGA-pool21	2093	741	976	0	1166	3.0667	0.354037	0.466316	0	2093	10x	tenx_B73	B73	NA	4.51036	-0.658253	0.0596154	singlet	13	Bundle_sheath
CB:Z:CTGTATTGTCATAAGA-pool21	81327	27803	31821	4	39946	4.60147	0.341867	0.391272	4.91842e-05	81327	10x	tenx_B73	B73	NA	1.67697	0.0855506	0.165385	singlet	1	Protoderm
CB:Z:TCCGACTTCTTCACTA-pool21	68596	23275	30769	7	32713	4.51472	0.339305	0.448554	0.000102047	68596	10x	tenx_B73	B73	NA	-1.9049	5.10355	0.123077	singlet	9	Vascular_parenchyma_precursor
CB:Z:ACCATCCGTAGGTGAC-pool21	15801	6082	8504	0	7698	3.88638	0.384912	0.538194	0	15801	10x	tenx_B73	B73	NA	-1.93759	5.08842	0.155769	singlet	9	Vascular_parenchyma_precursor
CB:Z:GGCACGTTCACGTCAA-pool21	185324	53095	54053	2	91455	4.96121	0.286498	0.291668	1.07919e-05	185324	10x	tenx_B73	B73	NA	0.0885664	2.32513	0.171154	singlet	1	Protoderm
CB:Z:TGAGTCATCTCCACTG-pool21	3210	763	728	0	1791	3.2531	0.237695	0.226791	0	3210	10x	tenx_B73	B73	NA	0.181389	2.13828	0.169231	singlet	1	Protoderm
CB:Z:TGTGTCCTCTCCACTG-pool21	3427	1334	1854	0	1885	3.27531	0.389262	0.540998	0	3427	10x	tenx_B73	B73	NA	-3.06558	-3.31543	0.190385	singlet	14	Procabium
CB:Z:CTGGCAGGTGGGTAGT-pool21	26366	6094	7159	0	13587	4.13312	0.231131	0.271524	0	26366	10x	tenx_B73	B73	NA	0.800722	0.296564	0.132692	singlet	5	Ground_meristem
CB:Z:GAGAACGAGTAGCAAT-pool21	16536	5133	6943	2	8560	3.93247	0.310414	0.419872	0.000120948	16536	10x	tenx_B73	B73	NA	1.68494	0.136845	0.169231	singlet	11	Mesophyll
CB:Z:TAGGTGTTCCCACGGA-pool21	40418	15385	19790	0	19586	4.29195	0.380647	0.489633	0	40418	10x	tenx_B73	B73	NA	1.02162	-0.0848731	0.153846	singlet	5	Ground_meristem
CB:Z:ACATGCAGTCACCGCA-pool21	23760	9307	10997	0	11545	4.06239	0.391709	0.462837	0	23760	10x	tenx_B73	B73	NA	-1.94779	4.7677	0.146154	singlet	9	Vascular_parenchyma_precursor
CB:Z:TTTGAGGGTCGATAGG-pool21	37639	9334	10154	0	19981	4.30062	0.247987	0.269773	0	37639	10x	tenx_B73	B73	NA	-2.27142	3.05248	0.153846	singlet	12	Epidermis
CB:Z:CCTAAAGTCCGTTTCG-pool21	91793	36062	51227	0	41127	4.61413	0.392862	0.558071	0	91793	10x	tenx_B73	B73	NA	2.34121	0.219482	0.188462	singlet	11	Mesophyll
CB:Z:TGACAACGTAAGGTCG-pool21	9698	3572	4763	0	5458	3.73703	0.368323	0.491132	0	9698	10x	tenx_B73	B73	NA	-1.37292	4.80748	0.0865385	singlet	9	Vascular_parenchyma_precursor
CB:Z:GCCATAAAGTTGGAAT-pool21	8141	1683	1685	0	4563	3.65925	0.206731	0.206977	0	8141	10x	tenx_B73	B73	NA	1.02074	0.581159	0.0961538	singlet	5	Ground_meristem
CB:Z:TAGCCGGGTCATGAGG-pool21	4074	1108	1298	2	2375	3.37566	0.271969	0.318606	0.000490918	4074	10x	tenx_B73	B73	NA	1.50767	4.44685	0.0711538	singlet	3	Axillary_meristem
CB:Z:ACCTGCTGTCCCTTTG-pool21	1124	370	416	0	636	2.80346	0.329181	0.370107	0	1124	10x	tenx_B73	B73	NA	1.64906	-1.46674	0.0807692	singlet	4	Ground_meristem
CB:Z:CTTTGCGAGGTTCGTT-pool21	152444	42547	43918	2	78170	4.89304	0.279099	0.288093	1.31196e-05	152444	10x	tenx_B73	B73	NA	0.0212959	1.82866	0.148077	singlet	1	Protoderm
CB:Z:GCCTACTAGTTAGCAA-pool21	39017	13502	18356	2	19164	4.28249	0.346054	0.470462	5.12597e-05	39017	10x	tenx_B73	B73	NA	2.52432	-0.0693875	0.105769	singlet	11	Mesophyll
CB:Z:TAAGCCAAGGTTCGTT-pool21	24120	7202	8552	0	12987	4.11351	0.29859	0.354561	0	24120	10x	tenx_B73	B73	NA	5.07183	-1.94008	0.113462	singlet	13	Bundle_sheath
CB:Z:CCACAGGGTACCCACG-pool21	13816	4241	4643	0	7359	3.86682	0.306963	0.33606	0	13816	10x	tenx_B73	B73	NA	-1.11902	5.56424	0.0865385	singlet	9	Vascular_parenchyma_precursor
CB:Z:AGACAAAGTCTCAAAC-pool21	7955	2546	3150	0	4271	3.63053	0.32005	0.395977	0	7955	10x	tenx_B73	B73	NA	-2.29118	2.90127	0.0923077	singlet	12	Epidermis
CB:Z:ATTGTGGTCCAGGTCG-pool21	60313	17374	20607	2	30987	4.49118	0.288064	0.341668	3.31603e-05	60313	10x	tenx_B73	B73	NA	0.708443	-0.749951	0.148077	singlet	5	Ground_meristem
CB:Z:CTCACCATCACAGGGA-pool21	54583	14038	15702	4	29945	4.47632	0.257186	0.287672	7.32829e-05	54583	10x	tenx_B73	B73	NA	0.401127	1.1074	0.0788462	singlet	1	Protoderm
CB:Z:CAACGGCGTGAGAGTC-pool21	30648	8004	6656	0	20109	4.30339	0.261159	0.217176	0	30648	10x	tenx_B73	B73	NA	-0.297155	2.64748	0.128846	singlet	1	Protoderm
CB:Z:TGGTCCTAGGGAAGCG-pool21	21194	4769	5802	0	11595	4.06427	0.225017	0.273757	0	21194	10x	tenx_B73	B73	NA	0.884363	-0.121302	0.142308	singlet	5	Ground_meristem
CB:Z:ACAGACTAGAAATTCG-pool21	16712	4930	7006	2	8655	3.93727	0.294998	0.41922	0.000119674	16712	10x	tenx_B73	B73	NA	0.890076	0.00495738	0.138462	singlet	5	Ground_meristem
CB:Z:ACTAGGTAGAAATACC-pool21	39992	11116	15881	2	20034	4.30177	0.277956	0.397104	5.001e-05	39992	10x	tenx_B73	B73	NA	1.02619	0.23963	0.192308	singlet	5	Ground_meristem
CB:Z:TTTGGCCCAGGTGTCC-pool21	38248	10814	13175	2	20202	4.30539	0.282734	0.344462	5.22903e-05	38248	10x	tenx_B73	B73	NA	4.29901	-1.93311	0.119231	singlet	13	Bundle_sheath
CB:Z:TTACCCGAGTGGTGTG-pool21	4469	1572	2163	0	2496	3.39724	0.351757	0.484001	0	4469	10x	tenx_B73	B73	NA	4.20297	-0.497861	0.103846	singlet	11	Mesophyll
CB:Z:ACCGGGTCAGCTGATT-pool21	3336	723	686	0	1850	3.26717	0.216727	0.205635	0	3336	10x	tenx_B73	B73	NA	0.0214964	1.73127	0.0769231	singlet	1	Protoderm
CB:Z:ACAAAGAGTTTCAGCA-pool21	13700	4204	5220	0	7350	3.86629	0.306861	0.381022	0	13700	10x	tenx_B73	B73	NA	-1.67415	5.09099	0.128846	singlet	9	Vascular_parenchyma_precursor
CB:Z:ACGTTAGTCTGGCCAG-pool21	25262	7547	9196	0	13201	4.12061	0.298749	0.364025	0	25262	10x	tenx_B73	B73	NA	-1.6537	5.14414	0.134615	singlet	9	Vascular_parenchyma_precursor
CB:Z:AGCCTGGGTGGCATAG-pool21	4191	1603	1913	0	2299	3.36154	0.382486	0.456454	0	4191	10x	tenx_B73	B73	NA	4.47598	-1.17656	0.0711538	singlet	13	Bundle_sheath
CB:Z:ACAAGCTAGTACTCTG-pool21	6618	2528	3242	2	3788	3.57841	0.381989	0.489876	0.000302206	6618	10x	tenx_B73	B73	NA	2.39739	5.54187	0.113462	singlet	3	Axillary_meristem
CB:Z:CCGTACTCAACTCGAT-pool21	1077	258	257	0	612	2.78675	0.239554	0.238626	0	1077	10x	tenx_B73	B73	NA	2.05157	-0.0737664	0.107692	singlet	11	Mesophyll
CB:Z:AACGTACAGTTCAACC-pool21	66391	23864	33085	2	31101	4.49277	0.359446	0.498336	3.01246e-05	66391	10x	tenx_B73	B73	NA	0.788096	0.75956	0.105769	singlet	5	Ground_meristem
CB:Z:GTGATCACATAGGCGA-pool21	14680	5761	7869	0	7237	3.85956	0.392439	0.536035	0	14680	10x	tenx_B73	B73	NA	4.89926	-1.55705	0.0711538	singlet	13	Bundle_sheath
CB:Z:GTTGGTACATCATGTG-pool21	10327	2725	3184	0	5657	3.75259	0.263871	0.308318	0	10327	10x	tenx_B73	B73	NA	-1.40867	3.63107	0.119231	singlet	5	Ground_meristem
CB:Z:CACCACTAGTTGCTTG-pool21	67752	18109	22181	6	34594	4.539	0.267284	0.327385	8.85583e-05	67752	10x	tenx_B73	B73	NA	-1.38038	1.70921	0.167308	singlet	12	Epidermis
CB:Z:ACAAACCTCGATGTAC-pool21	51574	16685	22911	2	25193	4.40128	0.323516	0.444235	3.87792e-05	51574	10x	tenx_B73	B73	NA	1.13973	0.142077	0.155769	singlet	5	Ground_meristem
CB:Z:GGAGAACCAGAGTCGA-pool21	71041	26625	34390	2	33138	4.52033	0.374784	0.484087	2.81528e-05	71041	10x	tenx_B73	B73	NA	2.47256	0.184398	0.0846154	singlet	11	Mesophyll
CB:Z:CTCTACGAGTCATACC-pool21	57046	18674	23348	0	27693	4.44237	0.32735	0.409284	0	57046	10x	tenx_B73	B73	NA	-3.44512	3.02783	0.107692	singlet	10	Xylem
CB:Z:GGTACCGTCGCGATGC-pool21	60912	20362	24137	0	29200	4.46538	0.334286	0.39626	0	60912	10x	tenx_B73	B73	NA	2.18955	-0.102242	0.159615	singlet	11	Mesophyll
CB:Z:CCACGTTTCTTTCGAT-pool21	7306	2024	2096	0	4325	3.63599	0.277033	0.286887	0	7306	10x	tenx_B73	B73	NA	2.8161	-0.0186616	0.105769	singlet	11	Mesophyll
CB:Z:TTCATTGGTAGCTGTT-pool21	29738	8070	8058	0	16939	4.22889	0.27137	0.270966	0	29738	10x	tenx_B73	B73	NA	-1.78887	1.64861	0.0634615	singlet	12	Epidermis
CB:Z:TCGAGCGTCTTACCTA-pool21	42834	13512	14608	0	22556	4.35326	0.31545	0.341037	0	42834	10x	tenx_B73	B73	NA	0.616226	0.584123	0.173077	singlet	5	Ground_meristem
CB:Z:TCAAAGCAGAAGACTT-pool21	29411	8574	11670	6	14934	4.17418	0.291524	0.39679	0.000204005	29411	10x	tenx_B73	B73	NA	1.21111	0.164161	0.0961538	singlet	5	Ground_meristem
CB:Z:TTCGCGTAGGTCTTGT-pool21	39325	11651	15568	0	19912	4.29911	0.296275	0.39588	0	39325	10x	tenx_B73	B73	NA	4.49106	-0.565704	0.167308	singlet	13	Bundle_sheath
CB:Z:TGCCTCACAGGTGTGA-pool21	7100	1978	2271	0	4111	3.61395	0.278592	0.319859	0	7100	10x	tenx_B73	B73	NA	1.44318	4.3612	0.0192308	singlet	3	Axillary_meristem
CB:Z:TTGCAGAGTACGCCCA-pool21	60364	20925	28531	4	28640	4.45697	0.346647	0.472649	6.62647e-05	60364	10x	tenx_B73	B73	NA	4.37387	-1.66805	0.109615	singlet	13	Bundle_sheath
CB:Z:GTCACAACACACATGT-pool21	7633	2266	2774	0	4062	3.60874	0.296869	0.363422	0	7633	10x	tenx_B73	B73	NA	1.12298	0.156329	0.169231	singlet	5	Ground_meristem
CB:Z:GAAATGACACAATAAG-pool21	28590	10785	15391	0	13855	4.14161	0.37723	0.538335	0	28590	10x	tenx_B73	B73	NA	-2.02694	5.19376	0.0788462	singlet	9	Vascular_parenchyma_precursor
CB:Z:GAACTTGCATGTGAGG-pool21	63097	20592	27868	6	30586	4.48552	0.326355	0.441669	9.50917e-05	63097	10x	tenx_B73	B73	NA	4.62091	-0.615894	0.159615	singlet	13	Bundle_sheath
CB:Z:GCTGTTCCAGATGGCA-pool21	32054	12887	16061	0	15352	4.18616	0.40204	0.501061	0	32054	10x	tenx_B73	B73	NA	-1.89424	5.12568	0.113462	singlet	9	Vascular_parenchyma_precursor
CB:Z:CATTGGAAGATATGAC-pool21	14139	3667	4465	2	7546	3.87772	0.259354	0.315793	0.000141453	14139	10x	tenx_B73	B73	NA	0.934385	0.517723	0.178846	singlet	5	Ground_meristem
CB:Z:ACCAAACCAATGTGCT-pool21	1016	249	264	0	562	2.74974	0.245079	0.259843	0	1016	10x	tenx_B73	B73	NA	-1.97137	5.0738	0.105769	singlet	9	Vascular_parenchyma_precursor
CB:Z:GTCACTCCATAGAATG-pool21	30506	11379	14835	0	14902	4.17324	0.373009	0.486298	0	30506	10x	tenx_B73	B73	NA	-2.28861	2.99129	0.163462	singlet	12	Epidermis
CB:Z:TTCGATTCAACTAGAA-pool21	38741	13145	17076	12	19207	4.28346	0.339305	0.440773	0.000309749	38741	10x	tenx_B73	B73	NA	-2.1938	2.88211	0.117308	singlet	12	Epidermis
CB:Z:TACCCTGGTCTGTGTA-pool21	37426	10918	11699	0	19607	4.29241	0.291722	0.31259	0	37426	10x	tenx_B73	B73	NA	4.53916	-1.89839	0.188462	singlet	13	Bundle_sheath
CB:Z:CGTACAACAATTCAGC-pool21	7083	1944	2341	0	3997	3.60173	0.27446	0.33051	0	7083	10x	tenx_B73	B73	NA	0.91037	-0.118788	0.101923	singlet	5	Ground_meristem
CB:Z:TACCTCGCAATTCAGC-pool21	20216	5352	6930	2	10842	4.03511	0.264741	0.342798	9.89315e-05	20216	10x	tenx_B73	B73	NA	0.999847	0.226404	0.125	singlet	5	Ground_meristem
CB:Z:TGATCAGGTCAACTGT-pool21	79693	30492	43052	0	36252	4.55933	0.382618	0.540223	0	79693	10x	tenx_B73	B73	NA	2.39711	0.197176	0.148077	singlet	11	Mesophyll
CB:Z:TTGTCTAAGGCGCTTC-pool21	29873	10972	13704	0	14475	4.16062	0.367288	0.458742	0	29873	10x	tenx_B73	B73	NA	-1.9515	5.20815	0.148077	singlet	9	Vascular_parenchyma_precursor
CB:Z:TGGCCTTAGGTTAGTA-pool21	22618	4889	5403	0	12189	4.08597	0.216155	0.238881	0	22618	10x	tenx_B73	B73	NA	-1.64933	2.23308	0.0961538	singlet	12	Epidermis
CB:Z:ACTGCGGAGGAGTACC-pool21	52600	16038	21323	0	26284	4.41969	0.304905	0.40538	0	52600	10x	tenx_B73	B73	NA	0.904603	-0.00461698	0.132692	singlet	5	Ground_meristem
CB:Z:CGTACAACATCGGCCA-pool21	14271	5602	7630	0	7806	3.89243	0.392544	0.534651	0	14271	10x	tenx_B73	B73	NA	1.38102	-1.58567	0.125	singlet	7	Ground_meristem
CB:Z:CTGTTCGCATCGGCCA-pool21	8616	3519	4744	0	4813	3.68242	0.408426	0.550604	0	8616	10x	tenx_B73	B73	NA	1.427	-1.56674	0.142308	singlet	7	Ground_meristem
CB:Z:GATTGACGTTACCACA-pool21	7621	2828	3361	0	4213	3.62459	0.37108	0.441018	0	7621	10x	tenx_B73	B73	NA	5.05716	-1.9242	0.113462	singlet	13	Bundle_sheath
CB:Z:TACCTCGCATCGGCCA-pool21	49636	18637	25422	0	24102	4.38205	0.375473	0.512169	0	49636	10x	tenx_B73	B73	NA	1.48887	-1.07695	0.0961538	singlet	7	Ground_meristem
CB:Z:TTGTTCAGTTTGCCCT-pool21	9656	2506	3175	0	5279	3.72255	0.259528	0.328811	0	9656	10x	tenx_B73	B73	NA	0.846091	0.582292	0.161538	singlet	5	Ground_meristem
CB:Z:TACAGCAAGCATTGGG-pool21	29361	11672	15181	0	14026	4.14693	0.397534	0.517046	0	29361	10x	tenx_B73	B73	NA	-3.12805	4.11053	0.0653846	singlet	10	Xylem
CB:Z:TGGGTTATCGGAGTTT-pool21	85349	22764	27348	6	43310	4.63659	0.266717	0.320426	7.02996e-05	85349	10x	tenx_B73	B73	NA	-1.39015	1.69318	0.182692	singlet	12	Epidermis
CB:Z:GCTCGAGCACTGGGCT-pool21	1356	515	695	0	740	2.86923	0.379794	0.512537	0	1356	10x	tenx_B73	B73	NA	-1.60469	5.76834	0.101923	singlet	9	Vascular_parenchyma_precursor
CB:Z:CTCACCACATTGCACA-pool21	127106	36927	43622	4	62442	4.79548	0.290521	0.343194	3.14698e-05	127106	10x	tenx_B73	B73	NA	4.41704	-1.94258	0.157692	singlet	13	Bundle_sheath
CB:Z:GATTAGCGTGAGTAAT-pool21	99505	30128	36103	6	48111	4.68224	0.302779	0.362826	6.02985e-05	99505	10x	tenx_B73	B73	NA	2.29791	0.0991415	0.1	singlet	11	Mesophyll
CB:Z:GCCTAGGAGAAGCCGT-pool21	47193	19170	26058	0	22178	4.34592	0.406204	0.552158	0	47193	10x	tenx_B73	B73	NA	-1.97773	5.25098	0.167308	singlet	9	Vascular_parenchyma_precursor
CB:Z:AACCGATAGGAAACTT-pool21	6131	2572	3409	0	3322	3.5214	0.419507	0.556027	0	6131	10x	tenx_B73	B73	NA	3.29398	-0.267512	0.0846154	singlet	11	Mesophyll
CB:Z:AACCGATAGGCAAGCT-pool21	119875	47078	61076	6	52288	4.7184	0.392726	0.509497	5.00521e-05	119875	10x	tenx_B73	B73	NA	0.0414901	2.44177	0.188462	singlet	1	Protoderm
CB:Z:CAGTATGTCGCTATAG-pool21	81887	33820	40484	0	35511	4.55036	0.413008	0.494389	0	81887	10x	tenx_B73	B73	NA	-1.69785	5.26633	0.178846	singlet	9	Vascular_parenchyma_precursor
CB:Z:CACCTGTAGGCTAAAT-pool21	6891	2974	4178	0	3680	3.56585	0.431577	0.606298	0	6891	10x	tenx_B73	B73	NA	-2.25181	-1.99139	0.161538	singlet	4	Ground_meristem
CB:Z:GCGTTGGCATCGAGTT-pool21	2755	613	732	0	1506	3.17782	0.222505	0.265699	0	2755	10x	tenx_B73	B73	NA	3.27953	1.77694	0.0769231	singlet	6	Vascular_parenchyma
CB:Z:TTGAGCACAGATTAAG-pool21	27287	8060	11820	0	13752	4.13837	0.295379	0.433173	0	27287	10x	tenx_B73	B73	NA	1.04959	0.136566	0.140385	singlet	5	Ground_meristem
CB:Z:AGCTGATGTATTCGAC-pool21	78678	24335	31735	0	37838	4.57793	0.309299	0.403353	0	78678	10x	tenx_B73	B73	NA	3.35705	1.99056	0.157692	singlet	6	Vascular_parenchyma
CB:Z:GCGTTGGGTAGCGAGT-pool21	11001	3199	4039	0	5824	3.76522	0.290792	0.367148	0	11001	10x	tenx_B73	B73	NA	3.22175	1.9656	0.144231	singlet	6	Vascular_parenchyma
CB:Z:AGTGCCGGTGTCCCAG-pool21	21967	7979	10941	0	10972	4.04029	0.363227	0.498065	0	21967	10x	tenx_B73	B73	NA	2.71028	-0.231881	0.148077	singlet	11	Mesophyll
CB:Z:CCAGAATTCAAACCCA-pool21	20348	5676	6449	0	10682	4.02865	0.278946	0.316935	0	20348	10x	tenx_B73	B73	NA	3.11282	2.27066	0.151923	singlet	6	Vascular_parenchyma
CB:Z:CAAGGCCGTGGATTCT-pool21	9862	3131	4339	0	5436	3.73528	0.317481	0.439972	0	9862	10x	tenx_B73	B73	NA	-2.18283	3.3337	0.0942308	singlet	11	Mesophyll
CB:Z:GTTATGGCAATGGTAA-pool21	14298	4462	6219	0	7773	3.89059	0.312072	0.434956	0	14298	10x	tenx_B73	B73	NA	-2.1808	3.29051	0.0980769	singlet	11	Mesophyll
CB:Z:CTGAATGTCCCGTATC-pool21	41004	8738	10006	0	22105	4.34449	0.213101	0.244025	0	41004	10x	tenx_B73	B73	NA	0.757068	0.492977	0.151923	singlet	5	Ground_meristem
CB:Z:CATGTTTCATACTGCA-pool21	35842	10233	11286	0	18555	4.26846	0.285503	0.314882	0	35842	10x	tenx_B73	B73	NA	0.839161	0.441744	0.178846	singlet	5	Ground_meristem
CB:Z:CAGTGTACACGATTAC-pool21	42232	9566	9051	2	22913	4.36008	0.226511	0.214316	4.73575e-05	42232	10x	tenx_B73	B73	NA	0.911057	0.596461	0.188462	singlet	5	Ground_meristem
CB:Z:GATCGTACAACACGGA-pool21	28781	7525	9935	2	15000	4.17609	0.261457	0.345193	6.94903e-05	28781	10x	tenx_B73	B73	NA	0.934733	-0.0972967	0.175	singlet	5	Ground_meristem
CB:Z:GGAGAACCAGGATGTG-pool21	35022	9898	12141	4	17665	4.24711	0.282622	0.346668	0.000114214	35022	10x	tenx_B73	B73	NA	-1.71767	2.06509	0.163462	singlet	5	Ground_meristem
CB:Z:CAGGATTAGTTCAGGG-pool21	14765	3274	4014	0	8002	3.9032	0.221741	0.271859	0	14765	10x	tenx_B73	B73	NA	1.32004	-0.735791	0.0826923	singlet	5	Ground_meristem
CB:Z:CTTAATCGTAGGTGAC-pool21	58423	18833	21969	2	29857	4.47505	0.322356	0.376033	3.42331e-05	58423	10x	tenx_B73	B73	NA	-1.6792	5.35167	0.126923	singlet	9	Vascular_parenchyma_precursor
CB:Z:AGCCCGATCTTCGTTA-pool21	13004	4476	5593	2	6703	3.82627	0.344202	0.430098	0.000153799	13004	10x	tenx_B73	B73	NA	-2.27861	0.986463	0.125	singlet	4	Ground_meristem
CB:Z:CCGTGAGCAAGATTAG-pool21	29731	10487	14130	2	16557	4.21898	0.352729	0.475262	6.72699e-05	29731	10x	tenx_B73	B73	NA	2.20265	5.75123	0.136538	singlet	3	Axillary_meristem
CB:Z:GCGCATGGTAGCGTTT-pool21	3734	1466	1859	0	2048	3.31133	0.392608	0.497858	0	3734	10x	tenx_B73	B73	NA	3.27074	-0.198882	0.0788462	singlet	9	Vascular_parenchyma_precursor
CB:Z:TTCTAACCAGATAAGT-pool21	16275	4165	6119	6	8478	3.92829	0.255914	0.375975	0.000368664	16275	10x	tenx_B73	B73	NA	1.03575	0.380023	0.196154	singlet	5	Ground_meristem
CB:Z:ATCCTCGGTCACAGGA-pool21	70248	24631	31841	0	33502	4.52507	0.350629	0.453266	0	70248	10x	tenx_B73	B73	NA	-1.19296	5.29605	0.138462	singlet	9	Vascular_parenchyma_precursor
CB:Z:AAACTGCAGAGGAAGT-pool21	48742	11591	14237	2	25884	4.41303	0.237803	0.292089	4.10324e-05	48742	10x	tenx_B73	B73	NA	0.824559	0.136151	0.138462	singlet	5	Ground_meristem
CB:Z:TTAGGTGCACCTACCT-pool21	14166	5639	7641	0	7398	3.86911	0.398066	0.53939	0	14166	10x	tenx_B73	B73	NA	-2.12251	5.18112	0.173077	singlet	9	Vascular_parenchyma_precursor
CB:Z:CTTCCAGGTGGTCGAA-pool21	8140	1640	2383	0	4460	3.64933	0.201474	0.292752	0	8140	10x	tenx_B73	B73	NA	1.10004	0.449633	0.186538	singlet	5	Ground_meristem
CB:Z:TGCTTTACAATCCATG-pool21	12898	3978	5545	2	6638	3.82204	0.30842	0.429912	0.000155063	12898	10x	tenx_B73	B73	NA	1.94757	0.126309	0.175	singlet	11	Mesophyll
CB:Z:GTGGCGTAGCTAACAA-pool21	1856	462	426	0	1132	3.05385	0.248922	0.229526	0	1856	10x	tenx_B73	B73	NA	2.86134	-0.198888	0.125	singlet	11	Mesophyll
CB:Z:GCCTAGGCAATCATCG-pool21	15532	4007	5127	2	8268	3.9174	0.257984	0.330093	0.000128766	15532	10x	tenx_B73	B73	NA	1.56465	0.0320867	0.169231	singlet	11	Mesophyll
CB:Z:GATTGACGTGATTCCA-pool21	226014	88706	118721	6	91388	4.96089	0.39248	0.525282	2.6547e-05	226014	10x	tenx_B73	B73	NA	-0.0625238	2.63517	0.169231	singlet	1	Protoderm
CB:Z:CAGCCTTTCCGCCTAT-pool21	3702	1505	2008	0	1996	3.30016	0.406537	0.54241	0	3702	10x	tenx_B73	B73	NA	-0.729092	-3.51132	0.144231	singlet	2	Bundle_sheath
CB:Z:CTTGAAGTCGCATACA-pool21	41231	12849	16167	2	20939	4.32096	0.311634	0.392108	4.85072e-05	41231	10x	tenx_B73	B73	NA	1.12779	0.384639	0.161538	singlet	5	Ground_meristem
CB:Z:CTTGCTGTCGCTTACC-pool21	1112	387	448	0	641	2.80686	0.348022	0.402878	0	1112	10x	tenx_B73	B73	NA	2.9917	-0.352363	0.115385	singlet	11	Mesophyll
CB:Z:CTTGTCGTCGCGTTCT-pool21	1405	521	653	0	814	2.91062	0.370819	0.464769	0	1405	10x	tenx_B73	B73	NA	2.9578	-0.325922	0.05	singlet	11	Mesophyll
CB:Z:GTCCATCCACCCTTAC-pool21	3559	1194	1523	0	1986	3.29798	0.335487	0.427929	0	3559	10x	tenx_B73	B73	NA	2.72057	-0.203833	0.113462	singlet	11	Mesophyll
CB:Z:TAACGGTCACCCTTAC-pool21	34049	10291	12068	0	17768	4.24964	0.302241	0.35443	0	34049	10x	tenx_B73	B73	NA	2.34457	0.116447	0.144231	singlet	11	Mesophyll
CB:Z:TATGTTCAGGGCATTG-pool21	8191	2182	2182	0	4713	3.6733	0.26639	0.26639	0	8191	10x	tenx_B73	B73	NA	-2.04643	2.38351	0.0788462	singlet	11	Mesophyll
CB:Z:TGCGTAAGTGGATTCT-pool21	14185	4837	6499	0	7245	3.86004	0.340994	0.45816	0	14185	10x	tenx_B73	B73	NA	4.48196	-0.772385	0.0961538	singlet	13	Bundle_sheath
CB:Z:CGGACTGTCCATACGA-pool21	18933	5545	7019	0	9793	3.99092	0.292875	0.370728	0	18933	10x	tenx_B73	B73	NA	1.70002	0.144597	0.188462	singlet	11	Mesophyll
CB:Z:TAGCACATCCAGAGAG-pool21	11641	4557	6442	2	6534	3.81518	0.391461	0.553389	0.000171807	11641	10x	tenx_B73	B73	NA	2.26016	5.76461	0.0846154	singlet	3	Axillary_meristem
CB:Z:TCAGTCCAGGGAGATA-pool21	8474	2158	2312	0	4581	3.66096	0.254661	0.272835	0	8474	10x	tenx_B73	B73	NA	4.43247	-1.40353	0.142308	singlet	13	Bundle_sheath
CB:Z:AGTCCGGTCCTTTGCG-pool21	16938	3852	4626	2	9048	3.95655	0.227418	0.273114	0.000118078	16938	10x	tenx_B73	B73	NA	1.19761	0.248334	0.190385	singlet	5	Ground_meristem
CB:Z:ACAAACCTCAATTCCT-pool21	32892	9170	13243	2	16618	4.22058	0.278791	0.402621	6.08051e-05	32892	10x	tenx_B73	B73	NA	1.30959	0.143656	0.171154	singlet	5	Ground_meristem
CB:Z:GCTCGAGGTGAAACAT-pool21	1647	624	913	0	933	2.96988	0.378871	0.554341	0	1647	10x	tenx_B73	B73	NA	-2.18538	0.470114	0.144231	singlet	4	Ground_meristem
CB:Z:GAAACAATCGCGTTCT-pool21	8641	3444	4596	2	5008	3.69966	0.398565	0.531883	0.000231455	8641	10x	tenx_B73	B73	NA	2.24994	5.72594	0.1	singlet	3	Axillary_meristem
CB:Z:ACTACCCAGTAATGTG-pool21	112045	42474	54623	0	49149	4.69151	0.37908	0.487509	0	112045	10x	tenx_B73	B73	NA	-1.2103	5.35277	0.146154	singlet	9	Vascular_parenchyma_precursor
CB:Z:GGTGTCGGTACGGAGT-pool21	18981	6581	7554	0	10668	4.02808	0.346715	0.397977	0	18981	10x	tenx_B73	B73	NA	4.30624	-0.531624	0.107692	singlet	11	Mesophyll
CB:Z:GCCAGACGTACAAGCG-pool21	3541	1183	1494	0	2057	3.31323	0.334086	0.421915	0	3541	10x	tenx_B73	B73	NA	2.1314	4.9847	0.0865385	singlet	3	Axillary_meristem
CB:Z:GAGATTCAGTCATCTG-pool21	12994	4438	5821	0	6636	3.82191	0.341542	0.447976	0	12994	10x	tenx_B73	B73	NA	1.59127	0.0954897	0.176923	singlet	5	Ground_meristem
CB:Z:GTTGGGCCAGGCAAGT-pool21	16137	3805	4418	2	9016	3.95501	0.235794	0.273781	0.000123939	16137	10x	tenx_B73	B73	NA	-2.1587	2.51074	0.1	singlet	11	Mesophyll
CB:Z:ACATGCATCAACTTGG-pool21	6715	1434	2164	2	3683	3.5662	0.213552	0.322264	0.000297841	6715	10x	tenx_B73	B73	NA	1.09185	0.366577	0.125	singlet	5	Ground_meristem
CB:Z:TAACGGTTCCGTGCGA-pool21	2938	1148	1468	0	1730	3.23805	0.390742	0.49966	0	2938	10x	tenx_B73	B73	NA	2.25705	5.67773	0.0884615	singlet	3	Axillary_meristem
CB:Z:TAGGTCACAGTAAGAT-pool21	6547	2339	3181	0	3566	3.55218	0.357263	0.485871	0	6547	10x	tenx_B73	B73	NA	2.78094	-0.430868	0.0653846	singlet	11	Mesophyll
CB:Z:GATTAGCTCTCTGAGA-pool21	25137	7653	10474	0	13099	4.11724	0.304452	0.416677	0	25137	10x	tenx_B73	B73	NA	2.64901	-0.261888	0.103846	singlet	11	Mesophyll
CB:Z:AGATAGACACAATAAG-pool21	10637	2904	3351	2	6255	3.79623	0.273009	0.315032	0.000188023	10637	10x	tenx_B73	B73	NA	-0.827036	4.65107	0.0865385	singlet	9	Vascular_parenchyma_precursor
CB:Z:TAACTTCGTACTAGAA-pool21	55865	18915	26489	6	27469	4.43884	0.338584	0.474161	0.000107402	55865	10x	tenx_B73	B73	NA	2.35487	-0.223076	0.121154	singlet	11	Mesophyll
CB:Z:CGCACAGCAGTAGTCT-pool21	35830	12227	16616	0	17544	4.24413	0.34125	0.463745	0	35830	10x	tenx_B73	B73	NA	2.60332	-0.00434881	0.107692	singlet	11	Mesophyll
CB:Z:CACAACAAGGTCGGTA-pool21	1242	545	839	0	674	2.82866	0.438808	0.675523	0	1242	10x	tenx_B73	B73	NA	-0.864833	-1.97014	0.123077	singlet	4	Ground_meristem
CB:Z:TTTGGTTCAAAGGTCG-pool21	73182	25150	33728	8	34517	4.53803	0.343664	0.460878	0.000109316	73182	10x	tenx_B73	B73	NA	0.749912	1.02648	0.142308	singlet	1	Protoderm
CB:Z:CTGGGACAGTACAACA-pool21	25316	7968	10374	0	12857	4.10914	0.314742	0.40978	0	25316	10x	tenx_B73	B73	NA	-1.64301	5.46488	0.111538	singlet	9	Vascular_parenchyma_precursor
CB:Z:TCGATTTAGGATATCA-pool21	4880	2106	3057	0	2624	3.41896	0.431557	0.626434	0	4880	10x	tenx_B73	B73	NA	-1.96089	-1.84777	0.136538	singlet	4	Ground_meristem
CB:Z:TAAGTGCTCATCATGG-pool21	19307	5122	5472	0	11117	4.04599	0.265292	0.283421	0	19307	10x	tenx_B73	B73	NA	2.25301	-0.70715	0.075	singlet	11	Mesophyll
CB:Z:TCAAGCACACTCGTGG-pool21	12388	3421	4193	0	6712	3.82685	0.276154	0.338473	0	12388	10x	tenx_B73	B73	NA	2.67138	-0.225551	0.109615	singlet	11	Mesophyll
CB:Z:CATTCCGAGCAATGTA-pool21	29774	7734	8955	2	15896	4.20129	0.259757	0.300766	6.71727e-05	29774	10x	tenx_B73	B73	NA	0.590318	0.440432	0.155769	singlet	5	Ground_meristem
CB:Z:GGAACTTTCCAAGTCA-pool21	5696	2170	2799	0	3159	3.49955	0.380969	0.491397	0	5696	10x	tenx_B73	B73	NA	-1.59651	-1.43072	0.155769	singlet	4	Ground_meristem
CB:Z:CTAACTTGTACAAATG-pool21	1223	382	392	0	734	2.8657	0.312347	0.320523	0	1223	10x	tenx_B73	B73	NA	1.51587	4.62206	0.0557692	singlet	3	Axillary_meristem
CB:Z:GAATCTGGTCGCGCTA-pool21	2805	810	877	0	1606	3.20575	0.28877	0.312656	0	2805	10x	tenx_B73	B73	NA	4.55588	-1.97085	0.0634615	singlet	13	Bundle_sheath
CB:Z:TTACCCGAGAGCCTGA-pool21	60001	20455	27908	2	28727	4.45829	0.340911	0.465126	3.33328e-05	60001	10x	tenx_B73	B73	NA	2.29885	0.163935	0.121154	singlet	11	Mesophyll
CB:Z:GACCCAGAGCAGAGCT-pool21	4921	2145	3063	0	2649	3.42308	0.435887	0.622434	0	4921	10x	tenx_B73	B73	NA	-2.04095	-1.99306	0.180769	singlet	4	Ground_meristem
CB:Z:TTGCGGGTCACTAGCA-pool21	1634	723	1018	0	889	2.9489	0.442472	0.623011	0	1634	10x	tenx_B73	B73	NA	-0.774316	-2.43325	0.186538	singlet	4	Ground_meristem
CB:Z:TGTGACACATGGGACA-pool21	34900	9896	12640	6	18011	4.25554	0.283553	0.362178	0.00017192	34900	10x	tenx_B73	B73	NA	0.822722	-0.185791	0.142308	singlet	5	Ground_meristem
CB:Z:TTGCAGAGTTCTACCC-pool21	17494	4084	4976	4	9452	3.97552	0.233451	0.28444	0.00022865	17494	10x	tenx_B73	B73	NA	4.38311	-1.98621	0.188462	singlet	13	Bundle_sheath
CB:Z:CTAACTTTCGCATACA-pool21	71046	26437	35790	0	33431	4.52415	0.372111	0.503758	0	71046	10x	tenx_B73	B73	NA	2.70991	0.105399	0.144231	singlet	11	Mesophyll
CB:Z:GCTGCGAAGCTGATTC-pool21	4432	1501	1951	0	2593	3.4138	0.338673	0.440208	0	4432	10x	tenx_B73	B73	NA	-0.557432	4.33957	0.05	singlet	3	Axillary_meristem
CB:Z:GCACGCACAAACCTAC-pool21	6638	1728	2017	0	3904	3.59151	0.260319	0.303857	0	6638	10x	tenx_B73	B73	NA	2.30318	4.92921	0.0480769	singlet	3	Axillary_meristem
CB:Z:TACCTATAGAGGAACA-pool21	1834	595	670	0	1068	3.02857	0.324427	0.365322	0	1834	10x	tenx_B73	B73	NA	2.42493	4.40042	0.0596154	singlet	3	Axillary_meristem
CB:Z:GCGTAGCCACAACGGA-pool21	14617	5018	6140	0	8484	3.9286	0.343299	0.420059	0	14617	10x	tenx_B73	B73	NA	2.19435	5.79177	0.121154	singlet	3	Axillary_meristem
CB:Z:GTAGGAGAGACCCATT-pool21	92352	35236	48253	10	41690	4.62003	0.38154	0.52249	0.000108281	92352	10x	tenx_B73	B73	NA	-0.451763	2.66407	0.159615	singlet	1	Protoderm
CB:Z:GTCACTCAGTTAGCGG-pool21	121280	30336	31534	0	63719	4.80427	0.250132	0.26001	0	121280	10x	tenx_B73	B73	NA	0.135397	1.24418	0.109615	singlet	1	Protoderm
CB:Z:AGTTTGGGTCTGAGCC-pool21	56850	14879	15784	0	31011	4.49152	0.261724	0.277643	0	56850	10x	tenx_B73	B73	NA	2.3499	0.226861	0.161538	singlet	11	Mesophyll
CB:Z:GGCGAAATCCCAATAG-pool21	19367	6662	8225	4	11086	4.04477	0.343987	0.424691	0.000206537	19367	10x	tenx_B73	B73	NA	2.19786	5.79663	0.105769	singlet	3	Axillary_meristem
CB:Z:GCGTAGCCAACCTCCT-pool21	20119	6279	7335	0	10735	4.0308	0.312093	0.364581	0	20119	10x	tenx_B73	B73	NA	1.10192	-0.900087	0.134615	singlet	5	Ground_meristem
CB:Z:AAGGAGCTCCTCCCAA-pool21	30681	8770	11955	2	15880	4.20085	0.285845	0.389655	6.51869e-05	30681	10x	tenx_B73	B73	NA	0.873599	-0.278066	0.128846	singlet	5	Ground_meristem
CB:Z:TACTAGGTCACATCCC-pool21	38470	14049	18303	0	18892	4.27628	0.365194	0.475773	0	38470	10x	tenx_B73	B73	NA	-2.30341	2.79923	0.194231	singlet	12	Epidermis
CB:Z:ATAGGCTGTAGGGTCA-pool21	16743	6427	8440	0	9571	3.98096	0.383862	0.504091	0	16743	10x	tenx_B73	B73	NA	2.2141	5.75238	0.101923	singlet	3	Axillary_meristem
CB:Z:AGGCCCAGTCCCTAAA-pool21	56883	14808	18410	2	29027	4.4628	0.260324	0.323647	3.51599e-05	56883	10x	tenx_B73	B73	NA	0.964794	0.743815	0.140385	singlet	5	Ground_meristem
CB:Z:CTTGCCACAGCGTCGT-pool21	8546	2836	3051	0	5074	3.70535	0.331851	0.357009	0	8546	10x	tenx_B73	B73	NA	4.28667	-0.823523	0.0673077	singlet	13	Bundle_sheath
CB:Z:AAATGCCGTTTCACCC-pool21	110345	42690	56157	2	48117	4.6823	0.386878	0.508922	1.8125e-05	110345	10x	tenx_B73	B73	NA	-1.1624	5.36969	0.109615	singlet	9	Vascular_parenchyma_precursor
CB:Z:ACCCAAAAGGCAAGGG-pool21	16326	3979	4408	0	8999	3.95419	0.243722	0.269999	0	16326	10x	tenx_B73	B73	NA	0.564924	0.389883	0.132692	singlet	5	Ground_meristem
CB:Z:CCGAAGCCAGCAGGTA-pool21	53483	17851	24890	8	25481	4.40622	0.33377	0.465382	0.00014958	53483	10x	tenx_B73	B73	NA	1.03058	-0.119597	0.196154	singlet	5	Ground_meristem
CB:Z:TAGCCGGAGGCGTAGT-pool21	74782	23717	25891	0	38277	4.58294	0.317149	0.34622	0	74782	10x	tenx_B73	B73	NA	3.2352	2.3524	0.111538	singlet	6	Vascular_parenchyma
CB:Z:ATGTCTTAGATACCAA-pool21	25485	8838	11362	0	12628	4.10133	0.346792	0.445831	0	25485	10x	tenx_B73	B73	NA	0.983976	0.795158	0.0769231	singlet	5	Ground_meristem
CB:Z:GCATTCCAGGTGTCGA-pool21	10481	2597	3382	0	5627	3.75028	0.247782	0.322679	0	10481	10x	tenx_B73	B73	NA	0.825873	-0.293719	0.188462	singlet	5	Ground_meristem
CB:Z:ACTATTCGTCTGGGAA-pool21	2256	804	1158	0	1272	3.10449	0.356383	0.513298	0	2256	10x	tenx_B73	B73	NA	-1.50438	-1.212	0.126923	singlet	4	Ground_meristem
CB:Z:GCGGAAACAAACTACC-pool21	6591	1413	1764	0	3530	3.54777	0.214383	0.267638	0	6591	10x	tenx_B73	B73	NA	0.98109	0.314321	0.159615	singlet	5	Ground_meristem
CB:Z:TAGCGGCAGAATAGTC-pool21	120918	32766	30747	0	75374	4.87722	0.270977	0.25428	0	120918	10x	tenx_B73	B73	NA	-0.000179637	2.42954	0.184615	singlet	1	Protoderm
CB:Z:CAGCCTTGTTGCAGCC-pool21	33969	9771	12557	4	17333	4.23887	0.287645	0.369661	0.000117754	33969	10x	tenx_B73	B73	NA	0.985553	0.683585	0.138462	singlet	5	Ground_meristem
CB:Z:AGCCAGCTCACGTGTA-pool21	17919	4803	6979	6	9203	3.96393	0.26804	0.389475	0.00033484	17919	10x	tenx_B73	B73	NA	1.22191	0.180305	0.123077	singlet	5	Ground_meristem
CB:Z:GGAGTAGAGTTAGCGG-pool21	49549	16768	21100	0	24450	4.38828	0.338412	0.425841	0	49549	10x	tenx_B73	B73	NA	2.62389	-0.0971486	0.142308	singlet	11	Mesophyll
CB:Z:CCGTACTTCGGATGTT-pool21	82253	27146	31523	0	40471	4.60714	0.330031	0.383244	0	82253	10x	tenx_B73	B73	NA	0.626093	0.506044	0.134615	singlet	1	Protoderm
CB:Z:CGGTGCAAGCAGAATT-pool21	33615	11523	16197	0	16875	4.22724	0.342793	0.481838	0	33615	10x	tenx_B73	B73	NA	2.46321	-0.721791	0.0730769	singlet	11	Mesophyll
CB:Z:CTGTATTGTGGCATAG-pool21	20098	6538	8698	0	10138	4.00595	0.325306	0.432779	0	20098	10x	tenx_B73	B73	NA	4.45735	-0.636612	0.0884615	singlet	13	Bundle_sheath
CB:Z:GTGACATGTACTAGAA-pool21	17334	5145	6501	0	8932	3.95095	0.296816	0.375043	0	17334	10x	tenx_B73	B73	NA	2.00899	0.152059	0.140385	singlet	11	Mesophyll
CB:Z:GTGTCCTGTACTAGAA-pool21	1157	382	484	0	637	2.80414	0.330164	0.418323	0	1157	10x	tenx_B73	B73	NA	2.89452	-0.346406	0.0461538	singlet	11	Mesophyll
CB:Z:CTGCGTTGTAGTCTGT-pool21	1284	388	518	0	707	2.84942	0.302181	0.403427	0	1284	10x	tenx_B73	B73	NA	2.72699	-2.39385	0.0692308	singlet	2	Bundle_sheath
CB:Z:ACATGGTCACTCCACT-pool21	5110	2254	3071	0	2723	3.43505	0.441096	0.600978	0	5110	10x	tenx_B73	B73	NA	-2.29411	-1.83984	0.134615	singlet	4	Ground_meristem
CB:Z:TTACGGACAATTGTGC-pool21	12168	3394	3708	0	6991	3.84454	0.278928	0.304734	0	12168	10x	tenx_B73	B73	NA	-0.027859	-0.211243	0.130769	singlet	1	Protoderm
CB:Z:GGTGTCGAGACACGGT-pool21	3048	1183	1560	0	1737	3.2398	0.388123	0.511811	0	3048	10x	tenx_B73	B73	NA	1.89624	5.03088	0.109615	singlet	3	Axillary_meristem
CB:Z:ATGTTTCTCTGTTTAC-pool21	32678	9960	13685	6	16769	4.22451	0.304792	0.418783	0.00018361	32678	10x	tenx_B73	B73	NA	0.850744	-0.0870108	0.180769	singlet	5	Ground_meristem
CB:Z:GATTAGCAGTCATACC-pool21	56254	20300	29575	2	26184	4.41804	0.360863	0.52574	3.5553e-05	56254	10x	tenx_B73	B73	NA	-1.66447	5.20752	0.0903846	singlet	9	Vascular_parenchyma_precursor
CB:Z:CGTAAACAGTCACACT-pool21	68942	23333	27889	2	32823	4.51618	0.338444	0.404528	2.90099e-05	68942	10x	tenx_B73	B73	NA	2.41913	0.0241209	0.0961538	singlet	11	Mesophyll
CB:Z:CACTAAGCAACGTAGG-pool21	83659	31174	38342	0	40641	4.60896	0.372632	0.458313	0	83659	10x	tenx_B73	B73	NA	-1.25932	5.52922	0.0692308	singlet	9	Vascular_parenchyma_precursor
CB:Z:CCTGGGATCTGGCCAG-pool21	15659	4591	5413	0	8369	3.92267	0.293186	0.34568	0	15659	10x	tenx_B73	B73	NA	-1.73324	2.09133	0.171154	singlet	5	Ground_meristem
CB:Z:AAATGAGCACCAAGGA-pool21	1722	766	997	0	939	2.97267	0.444832	0.578978	0	1722	10x	tenx_B73	B73	NA	-2.40107	-0.61351	0.157692	singlet	12	Epidermis
CB:Z:TTCGTTATCCTAGAGT-pool21	11916	4545	6590	2	6361	3.80353	0.38142	0.553038	0.000167842	11916	10x	tenx_B73	B73	NA	-2.10082	5.20588	0.113462	singlet	9	Vascular_parenchyma_precursor
CB:Z:GTAGTACTCTTGTCGC-pool21	107612	30257	34377	0	53338	4.72704	0.281168	0.319453	0	107612	10x	tenx_B73	B73	NA	0.511672	1.5548	0.146154	singlet	5	Ground_meristem
CB:Z:AGTGCGCGTCAACGGA-pool21	1164	273	258	0	646	2.81023	0.234536	0.221649	0	1164	10x	tenx_B73	B73	NA	-0.429933	1.25148	0.119231	singlet	1	Protoderm
CB:Z:GAACCGCCAATGGCTT-pool21	3142	1180	1376	0	1801	3.25551	0.375557	0.437938	0	3142	10x	tenx_B73	B73	NA	-1.9361	5.42916	0.109615	singlet	9	Vascular_parenchyma_precursor
CB:Z:CAGTGCGAGTTCGTTG-pool21	103234	40783	54387	2	45380	4.65686	0.395054	0.526832	1.93735e-05	103234	10x	tenx_B73	B73	NA	-1.15262	5.33011	0.0923077	singlet	9	Vascular_parenchyma_precursor
CB:Z:AATGCCAGTAGTCCAT-pool21	1040	413	551	0	565	2.75205	0.397115	0.529808	0	1040	10x	tenx_B73	B73	NA	-2.43243	3.10386	0.0826923	singlet	13	Bundle_sheath
CB:Z:CAGCTAAAGATATGTG-pool21	162618	61210	82293	8	69585	4.84252	0.376404	0.506051	4.9195e-05	162618	10x	tenx_B73	B73	NA	-0.224966	2.77042	0.171154	singlet	1	Protoderm
CB:Z:CCCAGAGAGTTGAATG-pool21	2548	906	1039	0	1457	3.16346	0.355573	0.407771	0	2548	10x	tenx_B73	B73	NA	-2.05871	5.25306	0.0884615	singlet	9	Vascular_parenchyma_precursor
CB:Z:GCTTTCGAGACAGTGC-pool21	110006	48172	61033	0	51068	4.70815	0.437903	0.554815	0	110006	10x	tenx_B73	B73	NA	-1.16627	5.27659	0.146154	singlet	9	Vascular_parenchyma_precursor
CB:Z:GAAAGTAGTTCTACGA-pool21	54162	22679	32612	0	25013	4.39817	0.418725	0.60212	0	54162	10x	tenx_B73	B73	NA	-1.89092	5.16965	0.119231	singlet	9	Vascular_parenchyma_precursor
CB:Z:GATTGACCAGGACTGA-pool21	4168	1609	2392	0	2276	3.35717	0.386036	0.573896	0	4168	10x	tenx_B73	B73	NA	-1.25075	-1.74494	0.128846	singlet	4	Ground_meristem
CB:Z:TCGGGACTCCAATCCC-pool21	24305	5244	6498	0	13321	4.12454	0.215758	0.267352	0	24305	10x	tenx_B73	B73	NA	1.12866	0.554766	0.184615	singlet	5	Ground_meristem
CB:Z:GGCGAAAAGGTTCGTT-pool21	52631	18743	22356	0	26660	4.42586	0.356121	0.424769	0	52631	10x	tenx_B73	B73	NA	-1.98442	5.21649	0.126923	singlet	9	Vascular_parenchyma_precursor
CB:Z:GTGTCAAAGTAACTCC-pool21	36667	16538	20448	0	16756	4.22417	0.451032	0.557668	0	36667	10x	tenx_B73	B73	NA	-1.92275	4.87442	0.165385	singlet	9	Vascular_parenchyma_precursor
CB:Z:CAGTATGAGAACTAAC-pool21	16700	4539	6175	0	8763	3.94265	0.271796	0.36976	0	16700	10x	tenx_B73	B73	NA	1.17336	-0.223674	0.165385	singlet	5	Ground_meristem
CB:Z:CCAGAATTCTTGGCCT-pool21	15719	5610	7535	0	7880	3.89653	0.356893	0.479356	0	15719	10x	tenx_B73	B73	NA	-2.61453	2.94451	0.111538	singlet	10	Xylem
CB:Z:AGCCAGCGTCGCGCTA-pool21	1272	529	695	0	710	2.85126	0.415881	0.546384	0	1272	10x	tenx_B73	B73	NA	-1.97904	5.25091	0.101923	singlet	9	Vascular_parenchyma_precursor
CB:Z:GTCACCTAGACGCCAA-pool21	25217	9909	15297	0	12235	4.0876	0.392949	0.606615	0	25217	10x	tenx_B73	B73	NA	1.9651	-1.1019	0.0961538	singlet	7	Ground_meristem
CB:Z:CTAGGGCGTACAAGCG-pool21	39794	13941	15568	0	19613	4.29254	0.350329	0.391215	0	39794	10x	tenx_B73	B73	NA	-3.47667	3.59694	0.0769231	singlet	10	Xylem
CB:Z:ATCCTGCTCAACACGT-pool21	199643	69526	82336	0	89781	4.95318	0.348252	0.412416	0	199643	10x	tenx_B73	B73	NA	0.14545	2.04919	0.196154	singlet	1	Protoderm
CB:Z:CAGTGTACACCTGTGG-pool21	1290	293	281	0	735	2.86629	0.227132	0.217829	0	1290	10x	tenx_B73	B73	NA	-0.966122	3.07619	0.0807692	singlet	9	Vascular_parenchyma_precursor
CB:Z:GCCAGACCAAGCACTT-pool21	4413	1148	1162	0	2603	3.41547	0.26014	0.263313	0	4413	10x	tenx_B73	B73	NA	-0.776128	3.27897	0.0365385	singlet	9	Vascular_parenchyma_precursor
CB:Z:GTGGATTAGCACGTAG-pool21	67114	15794	18296	4	34541	4.53833	0.235331	0.272611	5.96001e-05	67114	10x	tenx_B73	B73	NA	1.90526	0.14179	0.117308	singlet	11	Mesophyll
CB:Z:AATACGCAGGATTTGA-pool21	51768	19252	26374	4	27347	4.43691	0.37189	0.509465	7.72678e-05	51768	10x	tenx_B73	B73	NA	2.15735	5.78711	0.159615	singlet	3	Axillary_meristem
CB:Z:GGCGTTGAGAGCTACG-pool21	18981	6794	7913	2	9202	3.96388	0.357937	0.416891	0.000105369	18981	10x	tenx_B73	B73	NA	-1.89317	5.11626	0.178846	singlet	9	Vascular_parenchyma_precursor
CB:Z:TTACTTGAGGAGTAGA-pool21	5224	1750	2284	0	3003	3.47756	0.334992	0.437213	0	5224	10x	tenx_B73	B73	NA	2.11261	5.30813	0.138462	singlet	3	Axillary_meristem
CB:Z:GATTAGCTCACAGGGA-pool21	7969	2737	3775	0	4274	3.63083	0.343456	0.473711	0	7969	10x	tenx_B73	B73	NA	3.2093	-2.12204	0.075	singlet	2	Bundle_sheath
CB:Z:ACATGCAAGTTGGAAT-pool21	1915	418	507	0	1039	3.01662	0.218277	0.264752	0	1915	10x	tenx_B73	B73	NA	1.11436	0.5522	0.0480769	singlet	5	Ground_meristem
CB:Z:CGTGGCACACGTTAGT-pool21	3297	1402	1924	0	1778	3.24993	0.425235	0.583561	0	3297	10x	tenx_B73	B73	NA	-2.14748	-2.00417	0.125	singlet	4	Ground_meristem
CB:Z:AGCGTATGTACAAATG-pool21	22370	8032	10633	0	12728	4.10476	0.359052	0.475324	0	22370	10x	tenx_B73	B73	NA	2.1989	5.7736	0.132692	singlet	3	Axillary_meristem
CB:Z:CCTGGGATCGCGGCAT-pool21	21261	6937	9408	4	10928	4.03854	0.326278	0.4425	0.000188138	21261	10x	tenx_B73	B73	NA	1.01457	0.532895	0.142308	singlet	5	Ground_meristem
CB:Z:CCTCCCTTCTCGACCT-pool21	1766	655	854	0	1013	3.00561	0.370895	0.483579	0	1766	10x	tenx_B73	B73	NA	2.02188	5.04722	0.0923077	singlet	3	Axillary_meristem
CB:Z:CTCTACGTCAGTCTTT-pool21	4984	2155	3004	0	2678	3.42781	0.432384	0.602729	0	4984	10x	tenx_B73	B73	NA	-2.1073	-1.99461	0.188462	singlet	4	Ground_meristem
CB:Z:GACCAATTCCATGTTT-pool21	2016	730	791	0	1174	3.06967	0.362103	0.392361	0	2016	10x	tenx_B73	B73	NA	-2.22064	-4.67891	0.0596154	singlet	14	Procabium
CB:Z:TTTGGTTAGCCATCAT-pool21	9040	1921	2154	0	4893	3.68958	0.2125	0.238274	0	9040	10x	tenx_B73	B73	NA	-0.831835	3.16092	0.0846154	singlet	9	Vascular_parenchyma_precursor
CB:Z:CACCTGTCATTTGGCA-pool21	3864	1169	1445	0	2267	3.35545	0.302536	0.373965	0	3864	10x	tenx_B73	B73	NA	1.96762	4.86438	0.0673077	singlet	3	Axillary_meristem
CB:Z:TAACAGCGTACGACCC-pool21	18110	5132	6525	0	9502	3.97782	0.283379	0.360298	0	18110	10x	tenx_B73	B73	NA	4.24338	-1.74608	0.0653846	singlet	13	Bundle_sheath
CB:Z:TAACAGCGTCGATAGG-pool21	8574	2454	3181	0	4599	3.66266	0.286214	0.371005	0	8574	10x	tenx_B73	B73	NA	4.45286	-1.80122	0.0942308	singlet	13	Bundle_sheath
CB:Z:GAAGTGGGTTTAGGAA-pool21	1980	560	672	0	1151	3.06108	0.282828	0.339394	0	1980	10x	tenx_B73	B73	NA	-2.43481	-5.085	0.0326923	singlet	3	Axillary_meristem
CB:Z:TCAATTCTCAGGTTTG-pool21	14962	4778	6653	0	7918	3.89862	0.319342	0.44466	0	14962	10x	tenx_B73	B73	NA	-1.68551	0.457896	0.0442308	singlet	5	Ground_meristem
CB:Z:GTTGGTATCAGGAATA-pool21	2536	556	577	0	1456	3.16316	0.219243	0.227524	0	2536	10x	tenx_B73	B73	NA	-0.328305	0.200463	0.0615385	singlet	1	Protoderm
CB:Z:TATGTGGAGTGCTAGG-pool21	21810	8118	11126	2	12012	4.07962	0.372215	0.510133	9.17011e-05	21810	10x	tenx_B73	B73	NA	2.23493	5.76695	0.0961538	singlet	3	Axillary_meristem
CB:Z:TAGGTCAAGACGCCCT-pool21	10271	3789	5460	0	5534	3.74304	0.368903	0.531594	0	10271	10x	tenx_B73	B73	NA	-2.46197	1.16814	0.153846	singlet	9	Vascular_parenchyma_precursor
CB:Z:CACATGAGTAGTTTGC-pool21	103947	38410	49426	0	48236	4.68337	0.369515	0.475492	0	103947	10x	tenx_B73	B73	NA	-1.2217	5.35894	0.159615	singlet	9	Vascular_parenchyma_precursor
CB:Z:GATTGACAGTCGTATC-pool21	88824	31212	41144	2	42156	4.62486	0.351392	0.463208	2.25164e-05	88824	10x	tenx_B73	B73	NA	2.43576	0.17837	0.075	singlet	11	Mesophyll
CB:Z:ATTACCTAGATACCAA-pool21	16263	3728	3565	0	9250	3.96614	0.229232	0.219209	0	16263	10x	tenx_B73	B73	NA	-0.180182	1.79204	0.0673077	singlet	1	Protoderm
CB:Z:GGTCATACAATGGTCT-pool21	5498	1511	2063	0	2900	3.4624	0.274827	0.375227	0	5498	10x	tenx_B73	B73	NA	-1.65975	5.25358	0.117308	singlet	9	Vascular_parenchyma_precursor
CB:Z:AGCCAGCTCAACACGT-pool21	1345	354	337	0	758	2.87967	0.263197	0.250558	0	1345	10x	tenx_B73	B73	NA	4.4464	-1.46432	0.101923	singlet	13	Bundle_sheath
CB:Z:AACAAAGCAACGTCGC-pool21	17298	3763	4930	0	9188	3.96322	0.21754	0.285004	0	17298	10x	tenx_B73	B73	NA	0.906326	0.0733865	0.184615	singlet	5	Ground_meristem
CB:Z:AAACGAAGTGCATTCA-pool21	3074	1303	1736	0	1648	3.21696	0.423878	0.564736	0	3074	10x	tenx_B73	B73	NA	-1.81708	-1.60598	0.117308	singlet	4	Ground_meristem
CB:Z:GCAGCTGAGCCATTCA-pool21	30450	8923	10663	0	15705	4.19604	0.293038	0.350181	0	30450	10x	tenx_B73	B73	NA	0.771264	0.470885	0.167308	singlet	5	Ground_meristem
CB:Z:TGGACATTCCCACGGA-pool21	1226	346	409	0	715	2.85431	0.282219	0.333605	0	1226	10x	tenx_B73	B73	NA	-2.11932	5.24597	0.0711538	singlet	9	Vascular_parenchyma_precursor
CB:Z:GGAGTAGTCGCGTGAC-pool21	29576	10352	11923	0	14874	4.17243	0.350014	0.403131	0	29576	10x	tenx_B73	B73	NA	-1.53354	5.04907	0.151923	singlet	9	Vascular_parenchyma_precursor
CB:Z:CCCTAGTAGGAGTCTG-pool21	14972	5273	6547	0	7804	3.89232	0.352191	0.437283	0	14972	10x	tenx_B73	B73	NA	-2.22798	2.87918	0.138462	singlet	12	Epidermis
CB:Z:CTACTTACAAGGGAGG-pool21	5636	2384	3750	0	3040	3.48287	0.422995	0.665366	0	5636	10x	tenx_B73	B73	NA	1.94458	-1.20158	0.0807692	singlet	7	Ground_meristem
CB:Z:TCAAGGTCACTAGGAG-pool21	23180	5240	5111	0	13199	4.12054	0.226057	0.220492	0	23180	10x	tenx_B73	B73	NA	0.798464	0.557457	0.151923	singlet	5	Ground_meristem
CB:Z:TTCAACTTCTATCCTA-pool21	85615	30851	42704	6	39487	4.59645	0.360346	0.498791	7.00812e-05	85615	10x	tenx_B73	B73	NA	-0.546379	2.64821	0.0903846	singlet	1	Protoderm
CB:Z:CCTGGGAGTGCTTGAT-pool21	1000	442	642	0	540	2.73239	0.442	0.642	0	1000	10x	tenx_B73	B73	NA	-1.38021	-3.69456	0.134615	singlet	2	Bundle_sheath
CB:Z:CGGACTGGTCTGGGCT-pool21	51130	13706	16724	0	26658	4.42583	0.268062	0.327088	0	51130	10x	tenx_B73	B73	NA	-1.63146	1.45424	0.148077	singlet	5	Ground_meristem
CB:Z:GTTATTCGTACTAGAA-pool21	62423	14592	16183	2	32636	4.5137	0.23376	0.259247	3.20395e-05	62423	10x	tenx_B73	B73	NA	-1.69745	2.14257	0.123077	singlet	12	Epidermis
CB:Z:TTCGGTCGTAACCATC-pool21	12249	3750	5339	0	6414	3.80713	0.306147	0.435872	0	12249	10x	tenx_B73	B73	NA	2.85657	-1.83677	0.123077	singlet	11	Mesophyll
CB:Z:TCAGGTAGTAGGTGAC-pool21	1162	461	690	0	635	2.80277	0.39673	0.593804	0	1162	10x	tenx_B73	B73	NA	3.11258	-2.27948	0.0903846	singlet	2	Bundle_sheath
CB:Z:GGTCATACAATGATGA-pool21	75499	20372	21379	0	39141	4.59263	0.269831	0.283169	0	75499	10x	tenx_B73	B73	NA	4.25828	-1.76302	0.180769	singlet	13	Bundle_sheath
CB:Z:AAACGAACAGTAAGCG-pool21	27692	7337	9907	8	14317	4.15585	0.26495	0.357757	0.000288892	27692	10x	tenx_B73	B73	NA	1.04278	0.376907	0.192308	singlet	5	Ground_meristem
CB:Z:GATCGTACAGTAAGCG-pool21	1871	641	813	0	1026	3.01115	0.342598	0.434527	0	1871	10x	tenx_B73	B73	NA	3.38223	-0.220529	0.075	singlet	11	Mesophyll
CB:Z:AACGAGGCAGTAACTC-pool21	3172	1175	1542	0	1897	3.27807	0.370429	0.486129	0	3172	10x	tenx_B73	B73	NA	-1.36864	-1.75061	0.0538462	singlet	7	Ground_meristem
CB:Z:ACATGGTCAACTTGGT-pool21	38720	12540	17216	6	19158	4.28235	0.323864	0.444628	0.000154959	38720	10x	tenx_B73	B73	NA	4.54776	-0.77466	0.107692	singlet	13	Bundle_sheath
CB:Z:TCACCACAGAATACTG-pool21	22789	5355	7171	0	11942	4.07708	0.234982	0.314669	0	22789	10x	tenx_B73	B73	NA	0.93273	0.16316	0.103846	singlet	5	Ground_meristem
CB:Z:GACCCAGAGGGTCTGA-pool21	21282	6414	7818	0	11254	4.05131	0.301381	0.367353	0	21282	10x	tenx_B73	B73	NA	2.44783	-0.294074	0.121154	singlet	11	Mesophyll
CB:Z:TGATTTCGTATGCTAC-pool21	91962	30759	40269	4	43428	4.63777	0.334475	0.437887	4.34962e-05	91962	10x	tenx_B73	B73	NA	1.96251	0.239662	0.15	singlet	11	Mesophyll
CB:Z:CTCAGCTAGGCGTCCT-pool21	16354	5646	6572	0	8523	3.93059	0.345237	0.401859	0	16354	10x	tenx_B73	B73	NA	3.03523	1.44116	0.163462	singlet	5	Ground_meristem
CB:Z:TCAAGACTCCGATTGA-pool21	29064	8060	9590	0	15369	4.18665	0.277319	0.329961	0	29064	10x	tenx_B73	B73	NA	2.27352	-0.0704725	0.1	singlet	11	Mesophyll
CB:Z:ACAGAAAGTAACTCCA-pool21	11684	2895	3146	0	6246	3.7956	0.247775	0.269257	0	11684	10x	tenx_B73	B73	NA	-0.367315	0.750508	0.0903846	singlet	1	Protoderm
CB:Z:GAGGCTCCATGGTTTG-pool21	12599	2948	3141	0	6818	3.83366	0.233987	0.249306	0	12599	10x	tenx_B73	B73	NA	-0.237526	0.844822	0.136538	singlet	1	Protoderm
CB:Z:CTCATGCGTTGGGAAC-pool21	34749	12881	17479	2	16959	4.2294	0.370687	0.503007	5.75556e-05	34749	10x	tenx_B73	B73	NA	-2.25908	2.98184	0.0961538	singlet	12	Epidermis
CB:Z:GTTGGTACAATGTGCT-pool21	43605	13341	17075	0	22066	4.34372	0.305951	0.391584	0	43605	10x	tenx_B73	B73	NA	0.894166	0.282239	0.151923	singlet	5	Ground_meristem
CB:Z:ATCGAGTAGTCATCTG-pool21	17369	5097	6372	0	9655	3.98475	0.293454	0.36686	0	17369	10x	tenx_B73	B73	NA	-1.52491	-1.15228	0.0576923	singlet	4	Ground_meristem
CB:Z:CAGCTAAAGTGGTGTG-pool21	6158	2294	3310	0	3305	3.51917	0.372524	0.537512	0	6158	10x	tenx_B73	B73	NA	4.32486	-0.631916	0.075	singlet	13	Bundle_sheath
CB:Z:TGGTCAACATCACAGT-pool21	41028	14501	17946	0	20213	4.30563	0.353442	0.437409	0	41028	10x	tenx_B73	B73	NA	-2.13132	2.78553	0.161538	singlet	12	Epidermis
CB:Z:CATTGGACATGATTGC-pool21	9364	2265	2851	4	4797	3.68097	0.241884	0.304464	0.000427168	9364	10x	tenx_B73	B73	NA	2.91396	-0.0171207	0.075	singlet	11	Mesophyll
CB:Z:ACTAGGTCATTTGTTC-pool21	2899	702	790	0	1611	3.2071	0.242152	0.272508	0	2899	10x	tenx_B73	B73	NA	-1.61956	5.69004	0.0942308	singlet	9	Vascular_parenchyma_precursor
CB:Z:GTCACAATCTGGACAT-pool21	47538	15234	18645	0	24057	4.38124	0.320459	0.392213	0	47538	10x	tenx_B73	B73	NA	2.49092	0.058337	0.109615	singlet	11	Mesophyll
CB:Z:GGGAACAGTGACGCAA-pool21	5345	2112	2994	0	2839	3.45317	0.395136	0.56015	0	5345	10x	tenx_B73	B73	NA	-2.06866	-1.68925	0.125	singlet	4	Ground_meristem
CB:Z:GCAAAGGGTAAGTGCG-pool21	23221	7313	9743	4	11724	4.06908	0.31493	0.419577	0.000172258	23221	10x	tenx_B73	B73	NA	-2.38605	2.91317	0.0846154	singlet	12	Epidermis
CB:Z:ATAGGCTTCGCCTTAC-pool21	1082	427	628	0	600	2.77815	0.39464	0.580407	0	1082	10x	tenx_B73	B73	NA	-2.26982	3.13544	0.1	singlet	12	Epidermis
CB:Z:GATGGCCTCGATGAAA-pool21	27645	9636	13720	0	13808	4.14013	0.348562	0.496292	0	27645	10x	tenx_B73	B73	NA	-1.93618	5.05878	0.113462	singlet	5	Ground_meristem
CB:Z:CCTTGGTCACAAGGGT-pool21	5073	1769	2400	0	2799	3.447	0.348709	0.473093	0	5073	10x	tenx_B73	B73	NA	4.2012	-1.40528	0.0942308	singlet	13	Bundle_sheath
CB:Z:GGTAGGATCACAGGGA-pool21	14446	3321	3031	2	7373	3.86764	0.229891	0.209816	0.000138447	14446	10x	tenx_B73	B73	NA	-1.48083	2.4649	0.0538462	singlet	12	Epidermis
CB:Z:ATTTGTCGTGGCGCTT-pool21	9639	3580	4355	0	4918	3.69179	0.371408	0.45181	0	9639	10x	tenx_B73	B73	NA	-1.69111	5.63771	0.105769	singlet	9	Vascular_parenchyma_precursor
CB:Z:CATTCATGTGCTAGTT-pool21	10621	3156	3875	0	5617	3.7495	0.297147	0.364843	0	10621	10x	tenx_B73	B73	NA	1.65631	0.0480541	0.155769	singlet	11	Mesophyll
CB:Z:TCGGGACGTGTTGGTT-pool21	31212	11167	16609	6	15345	4.18597	0.357779	0.532135	0.000192234	31212	10x	tenx_B73	B73	NA	2.84769	0.00682789	0.0846154	singlet	11	Mesophyll
CB:Z:CTCTACGGTTGGCGAA-pool21	18259	5554	7450	0	9466	3.97617	0.304179	0.408018	0	18259	10x	tenx_B73	B73	NA	-1.78538	0.924123	0.134615	singlet	12	Epidermis
CB:Z:GCACGGTGTAGAACGC-pool21	87395	30646	41668	6	41475	4.61779	0.350661	0.476778	6.86538e-05	87395	10x	tenx_B73	B73	NA	0.966022	-0.238349	0.165385	singlet	5	Ground_meristem
CB:Z:GGATGAGAGAGTAAGG-pool21	3938	1368	1656	0	2269	3.35583	0.347384	0.420518	0	3938	10x	tenx_B73	B73	NA	1.92003	4.94274	0.05	singlet	3	Axillary_meristem
CB:Z:CAGCCTTTCTGGCACG-pool21	68501	24753	34092	10	32017	4.50538	0.361352	0.497686	0.000145983	68501	10x	tenx_B73	B73	NA	1.8919	0.145546	0.125	singlet	11	Mesophyll
CB:Z:ACAAGCTAGAAGCCTG-pool21	24008	5700	7102	0	12792	4.10694	0.237421	0.295818	0	24008	10x	tenx_B73	B73	NA	1.11962	0.321105	0.176923	singlet	5	Ground_meristem
CB:Z:GAGGATGCAAAGAGAG-pool21	3774	1425	1790	0	2195	3.34143	0.377583	0.474298	0	3774	10x	tenx_B73	B73	NA	-0.642832	4.86605	0.05	singlet	9	Vascular_parenchyma_precursor
CB:Z:AAGGTTCCACACATTG-pool21	13627	3196	4066	0	7452	3.87227	0.234534	0.298378	0	13627	10x	tenx_B73	B73	NA	1.03221	0.544146	0.165385	singlet	5	Ground_meristem
CB:Z:ACTGTCCTCTCCACTG-pool21	2494	1181	1560	0	1391	3.14333	0.473536	0.625501	0	2494	10x	tenx_B73	B73	NA	-1.49156	4.48984	0.119231	singlet	9	Vascular_parenchyma_precursor
CB:Z:GCGCCAAGTCGCTAGC-pool21	3218	1097	1499	0	1774	3.24895	0.340895	0.465817	0	3218	10x	tenx_B73	B73	NA	2.67105	-0.676425	0.107692	singlet	11	Mesophyll
CB:Z:ACAGAAACAGGCAGAT-pool21	1204	273	256	0	698	2.84386	0.226744	0.212625	0	1204	10x	tenx_B73	B73	NA	1.10361	-0.942379	0.134615	singlet	2	Bundle_sheath
CB:Z:TGCCTCATCTGATCCC-pool21	19015	6894	9230	2	10857	4.03571	0.362556	0.485406	0.00010518	19015	10x	tenx_B73	B73	NA	2.2481	5.78005	0.125	singlet	3	Axillary_meristem
CB:Z:TTCTAACTCATCGCTC-pool21	36173	14121	18245	0	17055	4.23185	0.390374	0.504382	0	36173	10x	tenx_B73	B73	NA	-1.66861	5.59227	0.115385	singlet	9	Vascular_parenchyma_precursor
CB:Z:TAATTCCCAAAGAAGG-pool21	36596	7805	9035	4	19723	4.29497	0.213275	0.246885	0.000109302	36596	10x	tenx_B73	B73	NA	0.874155	0.260599	0.176923	singlet	5	Ground_meristem
CB:Z:TAATTCCCAAAGCTGG-pool21	1859	433	547	0	1043	3.01828	0.232921	0.294244	0	1859	10x	tenx_B73	B73	NA	1.58395	-1.49989	0.134615	singlet	2	Bundle_sheath
CB:Z:GCTCCTATCGGAGTTT-pool21	2569	749	859	0	1480	3.17026	0.291553	0.334371	0	2569	10x	tenx_B73	B73	NA	3.07691	-0.28703	0.0692308	singlet	11	Mesophyll
CB:Z:AAGATAGGTCTGAGCC-pool21	3943	1060	1136	0	2344	3.36996	0.268831	0.288106	0	3943	10x	tenx_B73	B73	NA	-1.54113	5.35534	0.184615	singlet	9	Vascular_parenchyma_precursor
CB:Z:ACTATTCGTGGTAGAC-pool21	6389	1678	1861	0	3647	3.56194	0.262639	0.291282	0	6389	10x	tenx_B73	B73	NA	-1.54656	5.36689	0.161538	singlet	9	Vascular_parenchyma_precursor
CB:Z:TTAACGGCACAGCCAC-pool21	11436	3528	4009	0	6635	3.82184	0.308499	0.35056	0	11436	10x	tenx_B73	B73	NA	2.21372	4.93182	0.0519231	singlet	3	Axillary_meristem
CB:Z:CATTCATTCAAGAGAT-pool21	11755	4313	4677	0	6033	3.78053	0.366908	0.397873	0	11755	10x	tenx_B73	B73	NA	-1.65685	5.33916	0.0923077	singlet	9	Vascular_parenchyma_precursor
CB:Z:TAATTCCCAAGCAGGT-pool21	2307	508	608	0	1290	3.11059	0.220199	0.263546	0	2307	10x	tenx_B73	B73	NA	2.79339	-1.55213	0.0730769	singlet	2	Bundle_sheath
CB:Z:TACTAGGAGAGCCACA-pool21	5558	1393	1676	0	3026	3.48087	0.25063	0.301547	0	5558	10x	tenx_B73	B73	NA	1.01227	0.430019	0.15	singlet	5	Ground_meristem
CB:Z:AACTTGGAGGCGCTTC-pool21	37195	11525	15419	0	18910	4.27669	0.309853	0.414545	0	37195	10x	tenx_B73	B73	NA	1.41017	0.278787	0.103846	singlet	5	Ground_meristem
CB:Z:AGTCAACGTGATGCTT-pool21	9182	4065	5856	0	4885	3.68886	0.442714	0.63777	0	9182	10x	tenx_B73	B73	NA	-1.40531	5.14527	0.105769	singlet	9	Vascular_parenchyma_precursor
CB:Z:GCTCACTAGGTAAGTT-pool21	11709	3719	3947	0	6891	3.83828	0.317619	0.337091	0	11709	10x	tenx_B73	B73	NA	-1.59176	0.333102	0.0634615	singlet	12	Epidermis
CB:Z:TATCGAGAGCCATTCA-pool21	8162	1906	2190	0	4531	3.65619	0.233521	0.268317	0	8162	10x	tenx_B73	B73	NA	4.48837	-1.56009	0.103846	singlet	13	Bundle_sheath
CB:Z:GGAGAACCATGGGTGA-pool21	39561	13837	19073	0	19049	4.27987	0.349764	0.482116	0	39561	10x	tenx_B73	B73	NA	2.73319	-0.0366664	0.184615	singlet	11	Mesophyll
CB:Z:CTCTCGAGTCAATCCA-pool21	39088	9262	11761	0	20268	4.30681	0.236953	0.300885	0	39088	10x	tenx_B73	B73	NA	0.971872	0.479453	0.194231	singlet	5	Ground_meristem
CB:Z:CTGTATTGTGCTTCCT-pool21	3007	1054	1429	0	1608	3.20629	0.350515	0.475224	0	3007	10x	tenx_B73	B73	NA	4.28839	-0.800442	0.0519231	singlet	13	Bundle_sheath
CB:Z:GGTTGCGTCATTCTCA-pool21	4272	863	882	0	2516	3.40071	0.202013	0.206461	0	4272	10x	tenx_B73	B73	NA	-2.0671	0.751199	0.0807692	singlet	12	Epidermis
CB:Z:CCCACATAGTCCCTCT-pool21	13717	3832	4968	0	7225	3.85884	0.279361	0.362178	0	13717	10x	tenx_B73	B73	NA	1.94297	0.105185	0.175	singlet	11	Mesophyll
CB:Z:CTAGGATTCGTGGTAT-pool21	29319	8090	12463	2	14825	4.17099	0.27593	0.425083	6.82152e-05	29319	10x	tenx_B73	B73	NA	0.906806	-0.129784	0.176923	singlet	5	Ground_meristem
CB:Z:TAACTTCCAAGAGCGT-pool21	8637	2191	3012	0	4623	3.66492	0.253676	0.348732	0	8637	10x	tenx_B73	B73	NA	1.98385	-0.765863	0.0846154	singlet	11	Mesophyll
CB:Z:TCGCCTATCCTAAGTG-pool21	1116	360	364	0	607	2.78319	0.322581	0.326165	0	1116	10x	tenx_B73	B73	NA	0.113911	3.21465	0.125	singlet	3	Axillary_meristem
CB:Z:GCGAGAAGTCCGTGCA-pool21	28596	7357	8753	2	15177	4.18119	0.257274	0.306092	6.99399e-05	28596	10x	tenx_B73	B73	NA	1.02065	0.577024	0.151923	singlet	5	Ground_meristem
CB:Z:GGTGTCGAGTTAGCGG-pool21	2548	971	1258	0	1474	3.1685	0.381083	0.493721	0	2548	10x	tenx_B73	B73	NA	2.80671	-0.581427	0.0634615	singlet	11	Mesophyll
CB:Z:AACAAAGAGAGAGTAG-pool21	39228	8410	9863	2	21320	4.32879	0.214388	0.251428	5.0984e-05	39228	10x	tenx_B73	B73	NA	0.708379	0.436032	0.182692	singlet	5	Ground_meristem
CB:Z:GAGGCTCGTATTCGCA-pool21	38641	13962	18584	2	18909	4.27667	0.361326	0.48094	5.17585e-05	38641	10x	tenx_B73	B73	NA	-1.85093	5.03458	0.115385	singlet	9	Vascular_parenchyma_precursor
CB:Z:ATAGGCTAGTCCGGAA-pool21	13144	4637	6092	2	7586	3.88001	0.352785	0.463481	0.000152161	13144	10x	tenx_B73	B73	NA	2.20895	5.75695	0.0903846	singlet	3	Axillary_meristem
CB:Z:GCTCCTAGTGAAACAT-pool21	1110	363	544	0	609	2.78462	0.327027	0.49009	0	1110	10x	tenx_B73	B73	NA	-1.74844	5.78395	0.138462	singlet	9	Vascular_parenchyma_precursor
CB:Z:GCTCGAGCACTCGGAC-pool21	1353	317	398	0	753	2.87679	0.234294	0.294161	0	1353	10x	tenx_B73	B73	NA	-1.73378	5.19989	0.153846	singlet	9	Vascular_parenchyma_precursor
CB:Z:ACAAAGAGTTACCCAA-pool21	12029	3036	4068	0	6349	3.80271	0.25239	0.338183	0	12029	10x	tenx_B73	B73	NA	1.79876	-0.951666	0.115385	singlet	11	Mesophyll
CB:Z:GAGACTTAGGTAAGTT-pool21	14509	5126	7067	2	7459	3.87268	0.353298	0.487077	0.000137845	14509	10x	tenx_B73	B73	NA	2.8539	-0.270819	0.111538	singlet	11	Mesophyll
CB:Z:TTACCGCCACTCGCAG-pool21	21115	5804	7196	2	11164	4.04782	0.274876	0.3408	9.47194e-05	21115	10x	tenx_B73	B73	NA	1.01684	0.391422	0.155769	singlet	5	Ground_meristem
CB:Z:AACCTGATCTATACCT-pool21	2288	989	1430	0	1235	3.09167	0.432255	0.625	0	2288	10x	tenx_B73	B73	NA	-0.0150669	-3.41623	0.142308	singlet	2	Bundle_sheath
CB:Z:GATGGCCTCTGTGTGA-pool21	12312	3854	5411	2	6366	3.80387	0.313028	0.43949	0.000162443	12312	10x	tenx_B73	B73	NA	2.5583	-0.365687	0.153846	singlet	11	Mesophyll
CB:Z:GCACGCATCGCTACCT-pool21	49005	13512	15783	0	25620	4.40858	0.275727	0.322069	0	49005	10x	tenx_B73	B73	NA	0.849062	0.639121	0.159615	singlet	5	Ground_meristem
CB:Z:ATCCCTGCAGGACCTC-pool21	120125	39698	55396	2	53845	4.73115	0.330472	0.461153	1.66493e-05	120125	10x	tenx_B73	B73	NA	4.25647	-1.86128	0.132692	singlet	13	Bundle_sheath
CB:Z:AAAGGATCACATAAAG-pool21	83963	32519	44066	2	36319	4.56013	0.387302	0.524826	2.382e-05	83963	10x	tenx_B73	B73	NA	4.66709	-0.552167	0.138462	singlet	13	Bundle_sheath
CB:Z:TCCATCGGTTTGATCG-pool21	12308	3355	4249	2	6546	3.81598	0.272587	0.345223	0.000162496	12308	10x	tenx_B73	B73	NA	2.73124	-0.0887486	0.113462	singlet	11	Mesophyll
CB:Z:CAGCTGGGTTCTTATC-pool21	2765	612	616	0	1492	3.17377	0.221338	0.222785	0	2765	10x	tenx_B73	B73	NA	-1.75944	5.42354	0.196154	singlet	9	Vascular_parenchyma_precursor
CB:Z:TTACGTTGTGTTTCTT-pool21	4718	1221	1437	0	2784	3.44467	0.258796	0.304578	0	4718	10x	tenx_B73	B73	NA	4.83643	-1.78239	0.075	singlet	13	Bundle_sheath
CB:Z:AGTGCGCCAATGCCAT-pool21	9047	2197	2752	0	4795	3.68079	0.242843	0.304189	0	9047	10x	tenx_B73	B73	NA	1.09661	-3.36736	0.121154	singlet	2	Bundle_sheath
CB:Z:GTTATTCAGATATGAC-pool21	4887	1542	2178	0	2465	3.39182	0.315531	0.445672	0	4887	10x	tenx_B73	B73	NA	3.98573	-1.87973	0.153846	singlet	5	Ground_meristem
CB:Z:GGTTGCGAGGAATGGA-pool21	11055	3097	3371	0	6160	3.78958	0.280145	0.30493	0	11055	10x	tenx_B73	B73	NA	2.32744	-0.14077	0.115385	singlet	11	Mesophyll
CB:Z:GAGACTTCAAGCCCTG-pool21	2514	722	871	2	1454	3.16256	0.287192	0.34646	0.000795545	2514	10x	tenx_B73	B73	NA	1.81032	4.52242	0.0480769	singlet	3	Axillary_meristem
CB:Z:TGTAGCACAGGGTACA-pool21	22544	7228	9041	0	11550	4.06258	0.320617	0.401038	0	22544	10x	tenx_B73	B73	NA	4.91881	-1.9688	0.138462	singlet	13	Bundle_sheath
CB:Z:TTCTGTAGTAGATGAT-pool21	1274	368	408	0	746	2.87274	0.288854	0.320251	0	1274	10x	tenx_B73	B73	NA	-1.76804	1.77255	0.0769231	singlet	12	Epidermis
CB:Z:ACAGAAAAGGCAATTA-pool21	4870	2107	2784	0	2596	3.4143	0.432649	0.571663	0	4870	10x	tenx_B73	B73	NA	-2.29462	-1.84799	0.115385	singlet	4	Ground_meristem
CB:Z:AAAGGGCAGGCGTAGT-pool21	34725	7341	8247	0	18761	4.27326	0.211404	0.237495	0	34725	10x	tenx_B73	B73	NA	4.34169	-1.98092	0.182692	singlet	13	Bundle_sheath
CB:Z:GAAGAGCAGAGCTACG-pool21	19251	4805	6178	0	10581	4.02453	0.249597	0.320918	0	19251	10x	tenx_B73	B73	NA	0.915422	0.0736318	0.196154	singlet	5	Ground_meristem
CB:Z:AGCCTCTTCCTCATTA-pool21	25763	7027	8346	2	13330	4.12483	0.272756	0.323953	7.76307e-05	25763	10x	tenx_B73	B73	NA	0.973333	0.656397	0.117308	singlet	5	Ground_meristem
CB:Z:CCGAAGCGTCTAAAGA-pool21	1573	676	914	0	858	2.93349	0.429752	0.581055	0	1573	10x	tenx_B73	B73	NA	-1.91051	-1.72698	0.140385	singlet	4	Ground_meristem
CB:Z:CAAGGCCAGAGCCACA-pool21	58284	20759	24910	0	27789	4.44387	0.35617	0.42739	0	58284	10x	tenx_B73	B73	NA	2.69677	0.0419631	0.0692308	singlet	11	Mesophyll
CB:Z:AAATGAGGTGCTAGTT-pool21	18838	4580	5893	0	10046	4.00199	0.243126	0.312825	0	18838	10x	tenx_B73	B73	NA	1.0016	-0.00892565	0.163462	singlet	5	Ground_meristem
CB:Z:TACCCTGCACATGATC-pool21	32581	10644	15109	4	16349	4.21349	0.326693	0.463737	0.000122771	32581	10x	tenx_B73	B73	NA	3.36775	-1.91613	0.146154	singlet	2	Bundle_sheath
CB:Z:GAAGAGCGTTACCCAA-pool21	32418	7904	9941	10	17008	4.23065	0.243815	0.306651	0.000308471	32418	10x	tenx_B73	B73	NA	0.891338	0.256697	0.144231	singlet	5	Ground_meristem
CB:Z:CCTTAATCACGCTCAG-pool21	3594	1384	1929	0	1958	3.29181	0.385086	0.536728	0	3594	10x	tenx_B73	B73	NA	-1.70747	-1.27096	0.151923	singlet	4	Ground_meristem
CB:Z:AGTTACGGTCCGAGCT-pool21	14663	5007	6270	2	8495	3.92916	0.341472	0.427607	0.000136398	14663	10x	tenx_B73	B73	NA	2.19896	5.78884	0.0807692	singlet	3	Axillary_meristem
CB:Z:GCTGCGAGTTCTACCC-pool21	3030	761	962	0	1643	3.21564	0.251155	0.317492	0	3030	10x	tenx_B73	B73	NA	0.687985	-0.134793	0.0980769	singlet	1	Protoderm
CB:Z:GAGGCTCGTAGCCATT-pool21	9636	4336	6064	0	5116	3.70893	0.449979	0.629307	0	9636	10x	tenx_B73	B73	NA	-2.06924	-2.02404	0.138462	singlet	4	Ground_meristem
CB:Z:CCGTACTTCAAGAGAT-pool21	33725	10695	14997	0	16887	4.22755	0.317124	0.444685	0	33725	10x	tenx_B73	B73	NA	2.46861	-0.243083	0.0846154	singlet	11	Mesophyll
CB:Z:CGCGCAAGTTTGCCCT-pool21	14126	4102	5117	4	7443	3.87175	0.290387	0.36224	0.000283166	14126	10x	tenx_B73	B73	NA	1.12836	0.174763	0.101923	singlet	5	Ground_meristem
CB:Z:CTGTTCGGTGAATCAA-pool21	86709	24621	27951	0	45436	4.6574	0.28395	0.322354	0	86709	10x	tenx_B73	B73	NA	2.37248	0.246092	0.113462	singlet	11	Mesophyll
CB:Z:CGTTCCAAGTCTCTAG-pool21	4472	1453	1799	0	2400	3.38021	0.324911	0.402281	0	4472	10x	tenx_B73	B73	NA	3.03853	-1.60233	0.075	singlet	2	Bundle_sheath
CB:Z:GGTGCTGCATTACTCT-pool21	1984	632	736	0	1077	3.03222	0.318548	0.370968	0	1984	10x	tenx_B73	B73	NA	-1.81295	5.15405	0.0961538	singlet	9	Vascular_parenchyma_precursor
CB:Z:GTTGGGCCAAAGGAAG-pool21	193153	52017	54494	0	97343	4.9883	0.269305	0.282129	0	193153	10x	tenx_B73	B73	NA	-0.324005	2.546	0.182692	singlet	1	Protoderm
CB:Z:AGCTGTACACATTCTT-pool21	61168	15905	18511	0	31326	4.4959	0.260022	0.302626	0	61168	10x	tenx_B73	B73	NA	-0.89609	1.85658	0.175	singlet	12	Epidermis
CB:Z:CCCTGATGTATTTGCG-pool21	2755	1095	1403	0	1575	3.19728	0.397459	0.509256	0	2755	10x	tenx_B73	B73	NA	-1.06481	-1.64287	0.134615	singlet	7	Ground_meristem
CB:Z:AAACTGCAGCGTGTTT-pool21	10082	3426	4816	0	5259	3.7209	0.339814	0.477683	0	10082	10x	tenx_B73	B73	NA	2.25185	-1.06436	0.0615385	singlet	11	Mesophyll
CB:Z:TTGCCCAAGTTGCGCC-pool21	2461	859	1141	0	1548	3.18977	0.349045	0.463633	0	2461	10x	tenx_B73	B73	NA	-0.572168	-1.81773	0.0692308	singlet	7	Ground_meristem
CB:Z:CTACAGAGTAACGGAC-pool21	106929	35045	37462	0	51507	4.71187	0.327741	0.350345	0	106929	10x	tenx_B73	B73	NA	2.16485	0.428812	0.178846	singlet	1	Protoderm
CB:Z:GGGTGTCCAACTACTG-pool21	9411	3548	4753	0	5338	3.72738	0.377006	0.505047	0	9411	10x	tenx_B73	B73	NA	2.24386	5.7071	0.111538	singlet	3	Axillary_meristem
CB:Z:CAAGCTAGTGATAGAT-pool21	48386	18252	24543	2	23028	4.36226	0.377217	0.507233	4.13343e-05	48386	10x	tenx_B73	B73	NA	-1.93064	5.06045	0.125	singlet	9	Vascular_parenchyma_precursor
CB:Z:TAGTCCCTCGCTTACC-pool21	16036	4246	5624	0	8424	3.92552	0.264779	0.350711	0	16036	10x	tenx_B73	B73	NA	0.983133	0.355619	0.136538	singlet	5	Ground_meristem
CB:Z:TAATCGGCATTGTTCT-pool21	4185	1283	1539	0	2401	3.38039	0.306571	0.367742	0	4185	10x	tenx_B73	B73	NA	4.12828	-0.954403	0.0846154	singlet	13	Bundle_sheath
CB:Z:AACGAGGCAATGTAAG-pool21	28356	10132	13169	0	16020	4.20466	0.357314	0.464417	0	28356	10x	tenx_B73	B73	NA	2.13982	5.78067	0.1	singlet	3	Axillary_meristem
CB:Z:ACGTGGCAGGTACTCT-pool21	63578	24387	35227	2	29260	4.46627	0.383576	0.554075	3.14574e-05	63578	10x	tenx_B73	B73	NA	2.5612	0.238487	0.140385	singlet	11	Mesophyll
CB:Z:TTGTCTAAGTGATTAG-pool21	15748	3532	3991	2	8349	3.92163	0.224282	0.253429	0.000127	15748	10x	tenx_B73	B73	NA	0.774818	0.692382	0.113462	singlet	5	Ground_meristem
CB:Z:GCAGATTGTCAATACC-pool21	13713	2745	3200	0	7418	3.87029	0.200175	0.233355	0	13713	10x	tenx_B73	B73	NA	0.98302	0.423557	0.132692	singlet	5	Ground_meristem
CB:Z:AGCCTTCTCCTCCATG-pool21	74281	25306	33205	2	35544	4.55077	0.340679	0.447019	2.69248e-05	74281	10x	tenx_B73	B73	NA	0.954769	0.521294	0.105769	singlet	5	Ground_meristem
CB:Z:GATTGACTCTTACCTA-pool21	38417	8210	7731	0	21184	4.32601	0.213707	0.201239	0	38417	10x	tenx_B73	B73	NA	0.0221828	1.58361	0.180769	singlet	1	Protoderm
CB:Z:TCACTCGGTATTCGAC-pool21	26040	9189	12042	2	14867	4.17222	0.35288	0.462442	7.68049e-05	26040	10x	tenx_B73	B73	NA	2.20012	5.78206	0.115385	singlet	3	Axillary_meristem
CB:Z:GCGTTGGTCCCAGCAG-pool21	10620	2668	3819	2	5531	3.7428	0.251224	0.359605	0.000188324	10620	10x	tenx_B73	B73	NA	2.89693	-0.230208	0.0538462	singlet	11	Mesophyll
CB:Z:CTTGCTGGTCCGTGCA-pool21	37084	10835	12264	0	20459	4.31088	0.292175	0.330709	0	37084	10x	tenx_B73	B73	NA	2.95072	-2.08044	0.0903846	singlet	2	Bundle_sheath
CB:Z:GCGCATGAGTCTGGGA-pool21	49353	16912	22497	2	24401	4.38741	0.342674	0.455839	4.05244e-05	49353	10x	tenx_B73	B73	NA	4.33291	-1.61752	0.113462	singlet	13	Bundle_sheath
CB:Z:TAACAGCCATAGAATG-pool21	9546	2239	2633	0	5145	3.71139	0.234549	0.275822	0	9546	10x	tenx_B73	B73	NA	-1.99346	2.29254	0.107692	singlet	12	Epidermis
CB:Z:GGTACCGTCCTTGACC-pool21	13041	4521	5513	0	7110	3.85187	0.346676	0.422744	0	13041	10x	tenx_B73	B73	NA	2.40639	-0.685572	0.107692	singlet	11	Mesophyll
CB:Z:CAGGGCTCAAGGACCA-pool21	1836	644	835	0	1006	3.0026	0.350763	0.454793	0	1836	10x	tenx_B73	B73	NA	-1.4744	-1.63041	0.0576923	singlet	4	Ground_meristem
CB:Z:GGCGAAATCACTGGTA-pool21	57457	16249	20137	0	29549	4.47054	0.282803	0.350471	0	57457	10x	tenx_B73	B73	NA	2.40458	0.160833	0.0884615	singlet	11	Mesophyll
CB:Z:GACTAGTTCAGGCGCT-pool21	18324	5689	8067	0	9392	3.97276	0.310467	0.440242	0	18324	10x	tenx_B73	B73	NA	2.6886	0.100654	0.128846	singlet	11	Mesophyll
CB:Z:GCGAGTCTCTCGCGGA-pool21	110881	36709	46777	0	52539	4.72048	0.331067	0.421867	0	110881	10x	tenx_B73	B73	NA	0.0376766	1.93073	0.184615	singlet	1	Protoderm
CB:Z:TTACCCGAGGCAGTGT-pool21	2058	553	687	0	1144	3.05843	0.268707	0.333819	0	2058	10x	tenx_B73	B73	NA	-1.86727	5.02341	0.0865385	singlet	13	Bundle_sheath
CB:Z:TTACTCATCATGAACC-pool21	100407	35905	46198	4	46313	4.6657	0.357595	0.460107	3.98379e-05	100407	10x	tenx_B73	B73	NA	-0.575511	2.69392	0.109615	singlet	1	Protoderm
CB:Z:GCGGAAAGTTCCTATT-pool21	58074	17817	23971	2	28911	4.46106	0.306798	0.412766	3.44388e-05	58074	10x	tenx_B73	B73	NA	2.7777	-0.0395097	0.0923077	singlet	11	Mesophyll
CB:Z:GCGCATGCATTTGGCA-pool21	32024	9515	12283	2	16359	4.21376	0.297121	0.383556	6.24532e-05	32024	10x	tenx_B73	B73	NA	4.09882	-1.05937	0.165385	singlet	13	Bundle_sheath
CB:Z:GCGATTACAACGTAGG-pool21	14100	3437	4627	2	7620	3.88195	0.243759	0.328156	0.000141844	14100	10x	tenx_B73	B73	NA	1.07853	0.260289	0.155769	singlet	5	Ground_meristem
CB:Z:GTTATGGTCGTGCTTC-pool21	20204	4958	4229	2	10938	4.03894	0.245397	0.209315	9.89903e-05	20204	10x	tenx_B73	B73	NA	-0.926223	-6.31319	0.173077	singlet	8	Phloem
CB:Z:TGTGGCGAGCTGGAGT-pool21	30463	11168	16268	0	14779	4.16965	0.366609	0.534025	0	30463	10x	tenx_B73	B73	NA	2.93824	-0.149682	0.142308	singlet	11	Mesophyll
CB:Z:CAAGGCCAGATCCGAG-pool21	1800	395	364	0	1062	3.02612	0.219444	0.202222	0	1800	10x	tenx_B73	B73	NA	0.915119	-0.87619	0.111538	singlet	5	Ground_meristem
CB:Z:AGCCTCTCAAACCCTA-pool21	36500	12213	13654	0	18675	4.27126	0.334603	0.374082	0	36500	10x	tenx_B73	B73	NA	-1.65492	5.2259	0.134615	singlet	9	Vascular_parenchyma_precursor
CB:Z:ACAGGCCCAACTCGTA-pool21	29016	7648	9683	0	15050	4.17754	0.263579	0.333712	0	29016	10x	tenx_B73	B73	NA	0.980597	0.458423	0.169231	singlet	5	Ground_meristem
CB:Z:AGATAGAAGCGCAATG-pool21	68771	22149	25293	0	36978	4.56794	0.322069	0.367786	0	68771	10x	tenx_B73	B73	NA	2.44043	0.169638	0.0980769	singlet	11	Mesophyll
CB:Z:CGGACTGAGAACCCGA-pool21	1687	635	800	0	916	2.9619	0.376408	0.474215	0	1687	10x	tenx_B73	B73	NA	-0.39327	-3.12857	0.103846	singlet	2	Bundle_sheath
CB:Z:ACCGAATAGCTGAATA-pool21	24836	8762	10874	0	12741	4.1052	0.352794	0.437832	0	24836	10x	tenx_B73	B73	NA	5.01169	-1.94687	0.0980769	singlet	13	Bundle_sheath
CB:Z:CAAGCTAAGGGAAGCG-pool21	51574	17778	22841	4	28204	4.45031	0.344709	0.442878	7.75585e-05	51574	10x	tenx_B73	B73	NA	2.13644	5.80915	0.146154	singlet	3	Axillary_meristem
CB:Z:TCAGGTAGTGATAAGT-pool21	75078	24915	27926	0	36842	4.56634	0.331855	0.37196	0	75078	10x	tenx_B73	B73	NA	4.51784	-1.96625	0.190385	singlet	13	Bundle_sheath
CB:Z:TAGCATGCACTCAGCG-pool21	25127	7414	8973	0	13049	4.11558	0.295061	0.357106	0	25127	10x	tenx_B73	B73	NA	4.75041	-2.05482	0.148077	singlet	13	Bundle_sheath
CB:Z:CCGTAGGGTGCACCCA-pool21	27684	8161	9858	4	14294	4.15515	0.294791	0.35609	0.000144488	27684	10x	tenx_B73	B73	NA	0.814378	0.552252	0.117308	singlet	5	Ground_meristem
CB:Z:CAAGAAAAGGCCTCGT-pool21	15505	4605	5053	0	9346	3.97063	0.297001	0.325895	0	15505	10x	tenx_B73	B73	NA	1.8378	5.30867	0.0557692	singlet	3	Axillary_meristem
CB:Z:TGCTATTTCCATCATT-pool21	5184	1189	1234	0	2887	3.46045	0.22936	0.23804	0	5184	10x	tenx_B73	B73	NA	0.955693	0.686426	0.153846	singlet	5	Ground_meristem
CB:Z:GACTAGTGTCCAAGTT-pool21	1567	519	605	0	865	2.93702	0.331206	0.386088	0	1567	10x	tenx_B73	B73	NA	2.70784	4.38346	0.159615	singlet	3	Axillary_meristem
CB:Z:ACCTGCTGTGCAGACA-pool21	51811	15941	20015	2	26499	4.42323	0.307676	0.386308	3.86018e-05	51811	10x	tenx_B73	B73	NA	1.11733	-0.868741	0.0846154	singlet	5	Ground_meristem
CB:Z:CTGCGTTGTAGAAAGG-pool21	43782	15617	21976	0	20977	4.32174	0.356699	0.501941	0	43782	10x	tenx_B73	B73	NA	2.74716	-2.05331	0.101923	singlet	2	Bundle_sheath
CB:Z:GCTGTTCAGTGGTGTG-pool21	5018	1568	1843	0	2908	3.46359	0.312475	0.367278	0	5018	10x	tenx_B73	B73	NA	3.69644	-0.283143	0.0634615	singlet	11	Mesophyll
CB:Z:GACCCAGTCAATTGGC-pool21	40012	15085	21292	2	21369	4.32978	0.377012	0.53214	4.9985e-05	40012	10x	tenx_B73	B73	NA	2.18061	5.81638	0.0923077	singlet	3	Axillary_meristem
CB:Z:CAAAGCTAGAGTAAGG-pool21	10732	3278	4073	0	6018	3.77945	0.305442	0.379519	0	10732	10x	tenx_B73	B73	NA	0.817548	-0.209683	0.175	singlet	5	Ground_meristem
CB:Z:TTCGGTCTCCAAGAGG-pool21	1278	466	559	0	743	2.87099	0.364632	0.437402	0	1278	10x	tenx_B73	B73	NA	1.78447	5.13927	0.0692308	singlet	3	Axillary_meristem
CB:Z:CACAACAAGGTTAACA-pool21	169862	49950	54178	2	83059	4.91939	0.294062	0.318953	1.17743e-05	169862	10x	tenx_B73	B73	NA	-0.05604	2.06341	0.171154	singlet	1	Protoderm
CB:Z:GCATTGAAGTGAATAC-pool21	13498	4149	5189	0	7077	3.84985	0.307379	0.384427	0	13498	10x	tenx_B73	B73	NA	4.93388	-1.99655	0.0711538	singlet	13	Bundle_sheath
CB:Z:GCAAAGGTCTAGCTGA-pool21	39880	14109	18598	2	22135	4.34508	0.353786	0.466349	5.01505e-05	39880	10x	tenx_B73	B73	NA	2.12357	5.82289	0.125	singlet	3	Axillary_meristem
CB:Z:TCACCTGGTGTGTGCC-pool21	2350	774	998	0	1414	3.15045	0.329362	0.424681	0	2350	10x	tenx_B73	B73	NA	2.23618	5.73153	0.157692	singlet	3	Axillary_meristem
CB:Z:ATCGAGTTCTACATCT-pool21	4018	1604	2396	0	2185	3.33945	0.399204	0.596317	0	4018	10x	tenx_B73	B73	NA	-1.25081	-1.70704	0.138462	singlet	4	Ground_meristem
CB:Z:GAGGCTCAGGGTATCG-pool21	18372	5497	7112	4	9470	3.97635	0.299205	0.387111	0.000217723	18372	10x	tenx_B73	B73	NA	1.60296	0.040255	0.0519231	singlet	11	Mesophyll
CB:Z:TAATTCCCAGTGGTCC-pool21	7355	1901	2439	2	3894	3.5904	0.258464	0.331611	0.000271924	7355	10x	tenx_B73	B73	NA	1.98118	-0.0802588	0.136538	singlet	11	Mesophyll
CB:Z:CGCTATCGTAAACCCT-pool21	7186	2594	3520	0	3900	3.59106	0.36098	0.489841	0	7186	10x	tenx_B73	B73	NA	3.6224	-0.517833	0.0711538	singlet	11	Mesophyll
CB:Z:GCTCAGGGTTCCAATG-pool21	2902	789	884	0	1606	3.20575	0.271881	0.304618	0	2902	10x	tenx_B73	B73	NA	2.78737	-0.285842	0.1	singlet	9	Vascular_parenchyma_precursor
CB:Z:GTTGGGCTCTGACATG-pool21	58256	22769	24882	0	27805	4.44412	0.390844	0.427115	0	58256	10x	tenx_B73	B73	NA	-1.80717	5.30589	0.178846	singlet	9	Vascular_parenchyma_precursor
CB:Z:CCACGTTGTGCTGTCG-pool21	55039	17636	23289	0	27290	4.436	0.320427	0.423136	0	55039	10x	tenx_B73	B73	NA	2.29623	0.10327	0.109615	singlet	11	Mesophyll
CB:Z:CCGTACTGTAACGTAA-pool21	6261	1926	2414	0	3606	3.55703	0.307619	0.385561	0	6261	10x	tenx_B73	B73	NA	2.36469	4.75214	0.101923	singlet	3	Axillary_meristem
CB:Z:TCACAGACAGGGTACA-pool21	17092	5291	7008	0	8952	3.95192	0.30956	0.410016	0	17092	10x	tenx_B73	B73	NA	4.73197	-1.81652	0.176923	singlet	13	Bundle_sheath
CB:Z:ATTCGTTTCAGTACAC-pool21	51909	15570	19839	2	26294	4.41986	0.299948	0.382188	3.8529e-05	51909	10x	tenx_B73	B73	NA	0.803377	0.413872	0.196154	singlet	5	Ground_meristem
CB:Z:GCACCTTTCACGATTG-pool21	2928	664	858	0	1628	3.21165	0.226776	0.293033	0	2928	10x	tenx_B73	B73	NA	2.60061	-0.117506	0.153846	singlet	11	Mesophyll
CB:Z:CTGAATGCATACCCGG-pool21	14039	5614	8143	0	7642	3.88321	0.399886	0.580027	0	14039	10x	tenx_B73	B73	NA	2.17197	5.64913	0.176923	singlet	3	Axillary_meristem
CB:Z:TACCTATAGATTAGAC-pool21	69517	21576	25013	2	34684	4.54013	0.31037	0.359811	2.87699e-05	69517	10x	tenx_B73	B73	NA	4.6369	-1.42705	0.0884615	singlet	13	Bundle_sheath
CB:Z:ACTTTCATCTTCCAGC-pool21	84616	19030	21205	4	44944	4.65267	0.224898	0.250603	4.72724e-05	84616	10x	tenx_B73	B73	NA	0.574769	1.33795	0.157692	singlet	1	Protoderm
CB:Z:TGTACGATCACAGGGA-pool21	8613	2209	2473	0	5020	3.7007	0.256473	0.287124	0	8613	10x	tenx_B73	B73	NA	1.34647	-1.01195	0.148077	singlet	7	Ground_meristem
CB:Z:GTTGGGCCAAGTTCGT-pool21	3192	873	905	0	1855	3.26834	0.273496	0.283521	0	3192	10x	tenx_B73	B73	NA	1.94989	4.73501	0.0326923	singlet	3	Axillary_meristem
CB:Z:GCGAGAAAGTCGCCTG-pool21	15363	3847	3991	0	8334	3.92085	0.250407	0.25978	0	15363	10x	tenx_B73	B73	NA	-0.178143	1.13487	0.121154	singlet	1	Protoderm
CB:Z:CAGGATTTCAGTACAC-pool21	4849	1120	1260	2	2658	3.42455	0.230975	0.259847	0.000412456	4849	10x	tenx_B73	B73	NA	2.46158	-0.253302	0.107692	singlet	11	Mesophyll
CB:Z:CTTGTCGAGACAACGC-pool21	42475	13586	17427	0	21379	4.32999	0.319859	0.410288	0	42475	10x	tenx_B73	B73	NA	-2.26509	2.91841	0.155769	singlet	12	Epidermis
CB:Z:CAAGAAAGTTCTCGAA-pool21	97994	36961	51849	4	43024	4.63371	0.377176	0.529104	4.08188e-05	97994	10x	tenx_B73	B73	NA	-1.23815	5.40647	0.109615	singlet	9	Vascular_parenchyma_precursor
CB:Z:CTAACTTAGGAGAACA-pool21	3312	833	954	0	1946	3.28914	0.25151	0.288043	0	3312	10x	tenx_B73	B73	NA	1.5126	4.563	0.0653846	singlet	3	Axillary_meristem
CB:Z:GTCTACCTCCCACTAC-pool21	10020	2568	3563	0	5283	3.72288	0.256287	0.355589	0	10020	10x	tenx_B73	B73	NA	0.954466	0.178769	0.117308	singlet	5	Ground_meristem
CB:Z:ACCATCCGTAAACGTA-pool21	6989	2103	2595	0	3998	3.60184	0.300901	0.371298	0	6989	10x	tenx_B73	B73	NA	2.05983	4.9805	0.0596154	singlet	3	Axillary_meristem
CB:Z:GACTAACGTATTGTGC-pool21	28122	10095	14305	0	13782	4.13931	0.358972	0.508676	0	28122	10x	tenx_B73	B73	NA	2.33747	0.0954309	0.15	singlet	11	Mesophyll
CB:Z:GCATTGAAGGCTTAAA-pool21	60846	25434	32934	0	27753	4.44331	0.418006	0.541268	0	60846	10x	tenx_B73	B73	NA	-1.75122	5.31076	0.113462	singlet	9	Vascular_parenchyma_precursor
CB:Z:CGCACAGGTTTCCGGG-pool21	12696	3808	5534	0	6594	3.81915	0.299937	0.435885	0	12696	10x	tenx_B73	B73	NA	1.4443	-1.07869	0.0961538	singlet	7	Ground_meristem
CB:Z:CTCTAGCGTACCGGCT-pool21	8711	2978	3529	0	4999	3.69888	0.341867	0.40512	0	8711	10x	tenx_B73	B73	NA	3.28969	-0.480741	0.119231	singlet	11	Mesophyll
CB:Z:CCTCCCTCATCCTGGG-pool21	14234	2852	3612	0	7509	3.87558	0.200365	0.253759	0	14234	10x	tenx_B73	B73	NA	0.879207	0.194332	0.175	singlet	5	Ground_meristem
CB:Z:AATGGCTGTTGAAGCG-pool21	34428	10124	11912	4	18428	4.26548	0.294063	0.345997	0.000116185	34428	10x	tenx_B73	B73	NA	0.307124	0.812791	0.151923	singlet	1	Protoderm
CB:Z:GTGGATTTCCAACGCG-pool21	20686	6403	8727	0	10589	4.02485	0.309533	0.42188	0	20686	10x	tenx_B73	B73	NA	4.41392	-1.9859	0.115385	singlet	13	Bundle_sheath
CB:Z:TAGCGGCAGGCTTTAC-pool21	20688	5603	6461	0	10977	4.04048	0.270833	0.312307	0	20688	10x	tenx_B73	B73	NA	2.507	0.0615017	0.119231	singlet	11	Mesophyll
CB:Z:GCACGCAAGTCTGCTA-pool21	44200	12321	14455	2	22848	4.35885	0.278756	0.327036	4.52489e-05	44200	10x	tenx_B73	B73	NA	0.894142	0.18974	0.194231	singlet	5	Ground_meristem
CB:Z:GCATTGAAGTCTGCTA-pool21	42404	15328	21740	2	20670	4.31534	0.361475	0.512687	4.71654e-05	42404	10x	tenx_B73	B73	NA	2.85033	-0.0730976	0.125	singlet	11	Mesophyll
CB:Z:TCAGGGCGTCATAAGA-pool21	31591	11704	16931	0	15684	4.19546	0.370485	0.535944	0	31591	10x	tenx_B73	B73	NA	2.96651	-0.168974	0.136538	singlet	11	Mesophyll
CB:Z:GCAGCTGCAAACCCTA-pool21	5375	1109	1495	0	3004	3.4777	0.206326	0.27814	0	5375	10x	tenx_B73	B73	NA	1.5988	-1.10782	0.146154	singlet	7	Ground_meristem
CB:Z:CTGGCAGAGGCTTCGC-pool21	21286	6490	8481	0	11088	4.04485	0.304895	0.398431	0	21286	10x	tenx_B73	B73	NA	4.97289	-2.01651	0.117308	singlet	13	Bundle_sheath
CB:Z:CTAACTTAGTGTCCCG-pool21	39692	15220	20034	2	19141	4.28196	0.383453	0.504736	5.0388e-05	39692	10x	tenx_B73	B73	NA	-2.29054	3.09465	0.186538	singlet	12	Epidermis
CB:Z:TGCTATTAGACCATAA-pool21	1958	815	1046	0	1088	3.03663	0.416241	0.534219	0	1958	10x	tenx_B73	B73	NA	-2.57004	-0.508864	0.136538	singlet	12	Epidermis
CB:Z:CTGTTCGGTAGCGAGT-pool21	35903	10663	14092	0	18583	4.26912	0.296995	0.392502	0	35903	10x	tenx_B73	B73	NA	0.901311	0.128421	0.128846	singlet	5	Ground_meristem
CB:Z:TGTAAGCAGCAGGACT-pool21	20557	7757	10634	4	11474	4.05971	0.377341	0.517293	0.000194581	20557	10x	tenx_B73	B73	NA	2.22843	5.7914	0.113462	singlet	3	Axillary_meristem
CB:Z:CGGTGCATCAAGGCAG-pool21	4736	1423	1684	0	2650	3.42325	0.300465	0.355574	0	4736	10x	tenx_B73	B73	NA	3.04414	1.40778	0.171154	singlet	5	Ground_meristem
CB:Z:CGGTGCATCTATATCC-pool21	29262	7140	10449	0	14888	4.17284	0.244002	0.357084	0	29262	10x	tenx_B73	B73	NA	1.06719	0.561112	0.075	singlet	5	Ground_meristem
CB:Z:TTACTTGTCTTCCGTG-pool21	6218	1436	1285	0	3704	3.56867	0.230942	0.206658	0	6218	10x	tenx_B73	B73	NA	-3.33796	2.87077	0.111538	singlet	10	Xylem
CB:Z:TGCCTGTTCTGGAAGG-pool21	12034	4336	5160	0	6177	3.79078	0.360312	0.428785	0	12034	10x	tenx_B73	B73	NA	-1.6452	5.21388	0.173077	singlet	9	Vascular_parenchyma_precursor
CB:Z:ACGTGGCAGTGAGTTA-pool21	4159	1324	1629	0	2360	3.37291	0.318346	0.391681	0	4159	10x	tenx_B73	B73	NA	2.78382	4.41934	0.0826923	singlet	3	Axillary_meristem
CB:Z:CATAACGCATTTGGTG-pool21	3620	1213	1440	0	2064	3.31471	0.335083	0.39779	0	3620	10x	tenx_B73	B73	NA	-0.692979	4.65446	0.117308	singlet	9	Vascular_parenchyma_precursor
CB:Z:TCTCTGGAGAGCGAAA-pool21	3592	807	908	0	2112	3.32469	0.224666	0.252784	0	3592	10x	tenx_B73	B73	NA	-1.121	5.42366	0.0923077	singlet	9	Vascular_parenchyma_precursor
CB:Z:GACCCAGCACTCCCAT-pool21	32236	7468	8821	2	16868	4.22706	0.231666	0.273638	6.20424e-05	32236	10x	tenx_B73	B73	NA	0.739335	-0.126496	0.146154	singlet	5	Ground_meristem
CB:Z:ACTTTCACAAACGACG-pool21	1094	254	325	0	634	2.80209	0.232176	0.297075	0	1094	10x	tenx_B73	B73	NA	1.58227	4.75925	0.0788462	singlet	3	Axillary_meristem
CB:Z:TGACTCCGTAGGGTCA-pool21	133304	49649	64746	4	59744	4.77629	0.372449	0.485702	3.00066e-05	133304	10x	tenx_B73	B73	NA	-0.154281	2.74111	0.109615	singlet	1	Protoderm
CB:Z:TGACTCCGTCCGTGCA-pool21	6098	2404	3220	0	3447	3.53744	0.394228	0.528042	0	6098	10x	tenx_B73	B73	NA	4.33086	-0.542406	0.0923077	singlet	13	Bundle_sheath
CB:Z:ATTTGTCAGCGCAATG-pool21	11595	4296	5151	0	6731	3.82808	0.370505	0.444243	0	11595	10x	tenx_B73	B73	NA	1.93433	4.83108	0.0307692	singlet	3	Axillary_meristem
CB:Z:GCTCACTGTGGATTCT-pool21	22256	5277	6242	0	12036	4.08048	0.237105	0.280464	0	22256	10x	tenx_B73	B73	NA	1.07551	0.309611	0.165385	singlet	5	Ground_meristem
CB:Z:ACAGAAACATGCCTTC-pool21	20802	6530	8757	2	10683	4.02869	0.313912	0.420969	9.61446e-05	20802	10x	tenx_B73	B73	NA	0.897084	0.373112	0.169231	singlet	5	Ground_meristem
CB:Z:GTGCCAGGTTTCGATG-pool21	8823	2200	2395	0	5222	3.71784	0.249348	0.27145	0	8823	10x	tenx_B73	B73	NA	-0.735008	4.56769	0.0634615	singlet	9	Vascular_parenchyma_precursor
CB:Z:CAAAGCTGTCGACTGC-pool21	39905	11812	14938	5	20566	4.31315	0.296003	0.374339	0.000125298	39905	10x	tenx_B73	B73	NA	-1.96671	2.52318	0.117308	singlet	12	Epidermis
CB:Z:AGACAAAAGCCCATGC-pool21	116391	42421	58866	0	51627	4.71288	0.36447	0.505761	0	116391	10x	tenx_B73	B73	NA	-1.21799	5.35485	0.0865385	singlet	9	Vascular_parenchyma_precursor
CB:Z:ATCGAGTGTCAGCAAG-pool21	11960	3883	4502	0	6876	3.83734	0.324666	0.376421	0	11960	10x	tenx_B73	B73	NA	2.07573	4.89964	0.0557692	singlet	3	Axillary_meristem
CB:Z:CGTACAATCGTGGGTC-pool21	15630	5111	4804	0	9970	3.9987	0.326999	0.307358	0	15630	10x	tenx_B73	B73	NA	2.63511	0.0497935	0.144231	singlet	11	Mesophyll
CB:Z:CGCGCAATCATTCTTG-pool21	8852	3084	3845	0	5072	3.70518	0.348396	0.434365	0	8852	10x	tenx_B73	B73	NA	2.23651	5.72999	0.119231	singlet	3	Axillary_meristem
CB:Z:AATACGCAGGTGTCGA-pool21	7084	1750	2699	0	3699	3.56808	0.247036	0.380999	0	7084	10x	tenx_B73	B73	NA	1.21009	0.562358	0.173077	singlet	5	Ground_meristem
CB:Z:ACCTGCTAGGATGTAT-pool21	2166	742	898	0	1258	3.09968	0.342567	0.414589	0	2166	10x	tenx_B73	B73	NA	4.1758	-0.711461	0.109615	singlet	11	Mesophyll
CB:Z:TGGCGCAAGCTATCCA-pool21	33311	11840	15482	0	16211	4.20981	0.355438	0.464771	0	33311	10x	tenx_B73	B73	NA	-1.36039	5.41879	0.0673077	singlet	9	Vascular_parenchyma_precursor
CB:Z:TACGCCTCACCTGGTG-pool21	18338	6827	9249	0	10391	4.01666	0.372287	0.504363	0	18338	10x	tenx_B73	B73	NA	2.2012	5.79041	0.153846	singlet	3	Axillary_meristem
CB:Z:AACGTACAGGGTAATT-pool21	1170	414	453	0	672	2.82737	0.353846	0.387179	0	1170	10x	tenx_B73	B73	NA	3.92849	-1.62984	0.075	singlet	2	Bundle_sheath
CB:Z:AGTGTACGTGCGTAGA-pool21	6231	2077	2561	0	3657	3.56312	0.333333	0.411009	0	6231	10x	tenx_B73	B73	NA	2.25645	5.76853	0.0942308	singlet	3	Axillary_meristem
CB:Z:CTACTTAAGCGCGTTC-pool21	11621	2947	3868	4	6358	3.80332	0.253593	0.332846	0.000344204	11621	10x	tenx_B73	B73	NA	1.5335	0.125124	0.117308	singlet	5	Ground_meristem
CB:Z:TACTAGGTCGACTGGC-pool21	1498	576	673	0	876	2.9425	0.384513	0.449266	0	1498	10x	tenx_B73	B73	NA	2.12457	4.51304	0.0923077	singlet	3	Axillary_meristem
CB:Z:GGATGAGAGTGAAACT-pool21	6126	2079	2585	0	3544	3.54949	0.339373	0.421972	0	6126	10x	tenx_B73	B73	NA	2.17785	5.01322	0.0538462	singlet	3	Axillary_meristem
CB:Z:AACGAGGAGGAGAACA-pool21	16817	5371	6686	0	9475	3.97658	0.319379	0.397574	0	16817	10x	tenx_B73	B73	NA	2.25303	4.8406	0.0730769	singlet	3	Axillary_meristem
CB:Z:TTGCAGAGTAGCCATT-pool21	19035	7008	9262	0	10790	4.03302	0.368164	0.486577	0	19035	10x	tenx_B73	B73	NA	2.22161	5.76918	0.159615	singlet	3	Axillary_meristem
CB:Z:CTGCGTTGTCATTGGT-pool21	3076	708	775	0	1713	3.23376	0.230169	0.251951	0	3076	10x	tenx_B73	B73	NA	2.08416	-0.631377	0.0865385	singlet	11	Mesophyll
CB:Z:GCAAAGGAGGATTAAC-pool21	2705	1091	1391	0	1542	3.18808	0.403327	0.514233	0	2705	10x	tenx_B73	B73	NA	2.12736	5.12136	0.0884615	singlet	3	Axillary_meristem
CB:Z:ATCCTGCGTCACAGTT-pool21	10591	3355	4033	0	5767	3.76095	0.316778	0.380795	0	10591	10x	tenx_B73	B73	NA	4.17886	-0.822337	0.184615	singlet	5	Ground_meristem
CB:Z:GGCACGTAGACCCATT-pool21	34535	12528	16439	2	19076	4.28049	0.362762	0.47601	5.79123e-05	34535	10x	tenx_B73	B73	NA	2.19229	5.79396	0.0730769	singlet	3	Axillary_meristem
CB:Z:CAAAGCTGTGACGCAA-pool21	42006	14609	22320	8	20100	4.3032	0.347784	0.531353	0.000190449	42006	10x	tenx_B73	B73	NA	2.78225	-0.0693807	0.0826923	singlet	11	Mesophyll
CB:Z:GTTACTTGTCTCAAAC-pool21	12709	4221	5984	2	6505	3.81325	0.332127	0.470847	0.000157369	12709	10x	tenx_B73	B73	NA	2.72479	-0.484547	0.123077	singlet	11	Mesophyll
CB:Z:TGCTCACGTATCTAGC-pool21	3406	1482	1945	0	1843	3.26553	0.435115	0.571051	0	3406	10x	tenx_B73	B73	NA	-0.776926	-3.34041	0.0980769	singlet	2	Bundle_sheath
CB:Z:TGTTAGGTCCAACGCG-pool21	1170	375	418	0	643	2.80821	0.320513	0.357265	0	1170	10x	tenx_B73	B73	NA	-1.74549	0.305352	0.125	singlet	5	Ground_meristem
CB:Z:GCACGCAAGAATACTG-pool21	54316	16029	19085	0	27854	4.44489	0.295106	0.35137	0	54316	10x	tenx_B73	B73	NA	0.890182	0.696946	0.134615	singlet	5	Ground_meristem
CB:Z:GGCATTAGTGTTGGTT-pool21	4322	1518	1985	0	2526	3.40243	0.351226	0.459278	0	4322	10x	tenx_B73	B73	NA	2.9114	-0.559977	0.0519231	singlet	11	Mesophyll
CB:Z:GGTGCTGCAACAACTC-pool21	41403	15168	18996	0	20152	4.30432	0.36635	0.458807	0	41403	10x	tenx_B73	B73	NA	-1.8504	5.29707	0.0788462	singlet	9	Vascular_parenchyma_precursor
CB:Z:CCTTGGTCATTACTTC-pool21	16955	5013	5244	2	8981	3.95332	0.295665	0.309289	0.000117959	16955	10x	tenx_B73	B73	NA	0.982751	0.658643	0.182692	singlet	5	Ground_meristem
CB:Z:TGCATGACAAGGTCGA-pool21	28243	8896	11126	0	14358	4.15709	0.314981	0.393938	0	28243	10x	tenx_B73	B73	NA	2.32521	-0.18953	0.111538	singlet	11	Mesophyll
CB:Z:AGCCAGCGTCTAACCA-pool21	6948	2671	3688	0	3714	3.56984	0.384427	0.5308	0	6948	10x	tenx_B73	B73	NA	2.85004	-0.445237	0.0692308	singlet	11	Mesophyll
CB:Z:CCCTCTCAGGTGAACC-pool21	117126	38499	52270	0	55115	4.74127	0.328697	0.446272	0	117126	10x	tenx_B73	B73	NA	0.388432	1.5291	0.188462	singlet	1	Protoderm
CB:Z:AGGCGTCAGTCGAAAT-pool21	6681	2973	4175	0	3545	3.54962	0.444993	0.624906	0	6681	10x	tenx_B73	B73	NA	-1.85999	-1.63024	0.0673077	singlet	4	Ground_meristem
CB:Z:GGGTGTCGTACGGAGT-pool21	5540	1863	2173	0	3158	3.49941	0.336282	0.392238	0	5540	10x	tenx_B73	B73	NA	4.17286	-0.440323	0.0807692	singlet	9	Vascular_parenchyma_precursor
CB:Z:ACTTTCAGTGGAAGCT-pool21	34609	12156	17566	2	16855	4.22673	0.351238	0.507556	5.77884e-05	34609	10x	tenx_B73	B73	NA	2.36899	0.179071	0.1	singlet	11	Mesophyll
CB:Z:GGTGTCGTCGTCTAGA-pool21	4914	2203	3243	0	2653	3.42374	0.448311	0.659951	0	4914	10x	tenx_B73	B73	NA	-1.57181	-1.45377	0.153846	singlet	4	Ground_meristem
CB:Z:GACCCAGCAGGATGTG-pool21	14961	3626	4617	4	8098	3.90838	0.242363	0.308602	0.000267362	14961	10x	tenx_B73	B73	NA	0.826916	-0.166722	0.184615	singlet	5	Ground_meristem
CB:Z:GAGCGCTAGCTGAAAT-pool21	8042	3250	5014	0	4296	3.63306	0.404128	0.623477	0	8042	10x	tenx_B73	B73	NA	-1.41772	-1.62406	0.125	singlet	4	Ground_meristem
CB:Z:TGGACATTCTGTTTAC-pool21	41878	15666	21769	4	22589	4.3539	0.374087	0.519819	9.55155e-05	41878	10x	tenx_B73	B73	NA	2.13984	5.83285	0.0673077	singlet	3	Axillary_meristem
CB:Z:ACTATTCGTGCTGAAG-pool21	9193	3049	3760	0	5343	3.72779	0.331665	0.409007	0	9193	10x	tenx_B73	B73	NA	2.20916	5.73961	0.111538	singlet	3	Axillary_meristem
CB:Z:AGCGTATTCTCGGCGA-pool21	1458	616	926	0	806	2.90634	0.422497	0.635117	0	1458	10x	tenx_B73	B73	NA	0.442589	-2.04114	0.0923077	singlet	7	Ground_meristem
CB:Z:TTAGCGACAGTAAGCG-pool21	8115	2741	3176	0	4638	3.66633	0.33777	0.391374	0	8115	10x	tenx_B73	B73	NA	2.17502	4.99191	0.0519231	singlet	3	Axillary_meristem
CB:Z:TTGAGCACACTGTAAC-pool21	16064	4857	6316	0	8486	3.9287	0.302353	0.393177	0	16064	10x	tenx_B73	B73	NA	0.955104	-0.146339	0.140385	singlet	5	Ground_meristem
CB:Z:CATTCCGAGTCCAGAG-pool21	7433	2673	3750	0	4082	3.61087	0.359613	0.504507	0	7433	10x	tenx_B73	B73	NA	-1.66994	-1.53608	0.148077	singlet	4	Ground_meristem
CB:Z:GAAACAAAGGTACACG-pool21	18169	6813	9106	0	10287	4.01229	0.374979	0.501183	0	18169	10x	tenx_B73	B73	NA	2.21229	5.75167	0.119231	singlet	3	Axillary_meristem
CB:Z:CACAACATCTATCTAC-pool21	8165	2791	3312	0	4536	3.65667	0.341825	0.405634	0	8165	10x	tenx_B73	B73	NA	4.77545	-1.78656	0.0788462	singlet	13	Bundle_sheath
CB:Z:GTGGATTGTTGCTTGA-pool21	2734	823	937	0	1584	3.19976	0.301024	0.342721	0	2734	10x	tenx_B73	B73	NA	-1.83335	-1.60793	0.075	singlet	12	Epidermis
CB:Z:AGCCTCTTCAGTGGTT-pool21	47759	18680	23771	0	22549	4.35313	0.39113	0.497728	0	47759	10x	tenx_B73	B73	NA	-1.88691	5.16147	0.153846	singlet	9	Vascular_parenchyma_precursor
CB:Z:GCTGTTCGTAGATGAT-pool21	5437	1534	1496	0	3180	3.50243	0.282141	0.275152	0	5437	10x	tenx_B73	B73	NA	-3.77957	3.0322	0.0961538	singlet	11	Mesophyll
CB:Z:AACCTTTGTGTGACCC-pool21	1828	756	1098	0	987	2.99432	0.413567	0.600656	0	1828	10x	tenx_B73	B73	NA	-0.32071	-3.02292	0.130769	singlet	2	Bundle_sheath
CB:Z:GCTCGAGAGGCGATTG-pool21	1486	526	636	0	870	2.93952	0.35397	0.427995	0	1486	10x	tenx_B73	B73	NA	1.62342	4.87279	0.0596154	singlet	3	Axillary_meristem
CB:Z:TGATCAGCAATCATCG-pool21	1224	349	400	0	703	2.84696	0.285131	0.326797	0	1224	10x	tenx_B73	B73	NA	-2.29137	-5.00738	0.0961538	singlet	14	Procabium
CB:Z:CCGTGAGTCAGGTTTG-pool21	1232	303	355	0	698	2.84386	0.245942	0.288149	0	1232	10x	tenx_B73	B73	NA	-2.23016	2.8027	0.138462	singlet	12	Epidermis
CB:Z:AGCGTGCAGGTCTTGT-pool21	5287	1835	2338	0	2970	3.47276	0.347078	0.442217	0	5287	10x	tenx_B73	B73	NA	-0.313833	4.50482	0.126923	singlet	9	Vascular_parenchyma_precursor
CB:Z:AACAAAGTCAGGAATA-pool21	40875	10970	13895	0	21494	4.33232	0.268379	0.339939	0	40875	10x	tenx_B73	B73	NA	0.972372	0.112775	0.186538	singlet	5	Ground_meristem
CB:Z:CTCAGAATCCCGATTC-pool21	1526	670	811	0	905	2.95665	0.439056	0.531455	0	1526	10x	tenx_B73	B73	NA	1.93555	4.79233	0.0326923	singlet	3	Axillary_meristem
CB:Z:AGCGATTGTAGATTAG-pool21	5521	1193	1231	2	3136	3.49638	0.216084	0.222967	0.000362253	5521	10x	tenx_B73	B73	NA	0.566142	0.363743	0.194231	singlet	5	Ground_meristem
CB:Z:GATTGACCAGTAAGCG-pool21	46910	20063	27381	0	21148	4.32527	0.427691	0.583692	0	46910	10x	tenx_B73	B73	NA	-1.171	5.40816	0.0923077	singlet	9	Vascular_parenchyma_precursor
CB:Z:AGCCTTCGTTCTTTCA-pool21	7944	3018	3971	0	3987	3.60065	0.379909	0.499874	0	7944	10x	tenx_B73	B73	NA	-1.72842	5.61815	0.136538	singlet	9	Vascular_parenchyma_precursor
CB:Z:CTCTACGAGTCTGTGT-pool21	22069	8938	12064	2	10812	4.03391	0.405002	0.546649	9.06249e-05	22069	10x	tenx_B73	B73	NA	-1.92188	5.31018	0.128846	singlet	9	Vascular_parenchyma_precursor
CB:Z:TAAGCCATCGATCTTT-pool21	1472	411	497	0	859	2.93399	0.279212	0.337636	0	1472	10x	tenx_B73	B73	NA	-0.952962	4.85186	0.0480769	singlet	9	Vascular_parenchyma_precursor
CB:Z:GACTAACAGTCGATAA-pool21	3231	1029	1220	0	1867	3.27114	0.318477	0.377592	0	3231	10x	tenx_B73	B73	NA	1.95676	4.99122	0.0596154	singlet	3	Axillary_meristem
CB:Z:TGCCTCAAGTAACATG-pool21	4672	2035	2924	0	2526	3.40243	0.435574	0.625856	0	4672	10x	tenx_B73	B73	NA	-2.23727	-1.9134	0.165385	singlet	4	Ground_meristem
CB:Z:TGCCTCAAGGATTTGA-pool21	6630	2657	3811	0	3644	3.56158	0.400754	0.574811	0	6630	10x	tenx_B73	B73	NA	-1.49832	-1.3891	0.111538	singlet	4	Ground_meristem
CB:Z:CCTTAATGTACTTGAC-pool21	7045	2182	2739	0	4030	3.60531	0.309723	0.388786	0	7045	10x	tenx_B73	B73	NA	2.07553	5.1001	0.107692	singlet	3	Axillary_meristem
CB:Z:ACTTTCACACTGGGCT-pool21	35728	8326	9361	0	19084	4.28067	0.233039	0.262007	0	35728	10x	tenx_B73	B73	NA	2.33398	0.0548361	0.105769	singlet	11	Mesophyll
CB:Z:TTTGTGTCACTGTCGG-pool21	30917	11844	16467	0	15011	4.17641	0.38309	0.53262	0	30917	10x	tenx_B73	B73	NA	-1.52954	5.62066	0.0826923	singlet	9	Vascular_parenchyma_precursor
CB:Z:GCGAGTCGTCGAGGTA-pool21	5607	2416	3392	0	3001	3.47727	0.43089	0.604958	0	5607	10x	tenx_B73	B73	NA	-2.14549	-1.97002	0.184615	singlet	4	Ground_meristem
CB:Z:ACAGAAAAGCTCGGCT-pool21	5344	1744	2031	0	3107	3.49234	0.326347	0.380052	0	5344	10x	tenx_B73	B73	NA	-2.03673	-4.23921	0.0653846	singlet	1	Protoderm
CB:Z:GGCGAAACATCCCAAA-pool21	8006	2317	2862	0	4594	3.66219	0.289408	0.357482	0	8006	10x	tenx_B73	B73	NA	-0.773821	4.77566	0.0692308	singlet	9	Vascular_parenchyma_precursor
CB:Z:GGAGAACCATCGACCG-pool21	12891	4311	5277	0	7495	3.87477	0.334419	0.409355	0	12891	10x	tenx_B73	B73	NA	-0.732901	4.69132	0.109615	singlet	9	Vascular_parenchyma_precursor
CB:Z:TGGGTTAAGTTGCTTG-pool21	10230	3687	4684	0	5296	3.72395	0.360411	0.457869	0	10230	10x	tenx_B73	B73	NA	-2.16069	2.87532	0.171154	singlet	12	Epidermis
CB:Z:GATGATCCACAAACAA-pool21	4504	1464	1723	0	2649	3.42308	0.325044	0.382549	0	4504	10x	tenx_B73	B73	NA	2.11437	4.80432	0.0442308	singlet	3	Axillary_meristem
CB:Z:AACTTGGCATACTGCA-pool21	9227	2584	2718	0	5432	3.73496	0.280048	0.29457	0	9227	10x	tenx_B73	B73	NA	2.55654	0.0509977	0.146154	singlet	11	Mesophyll
CB:Z:CGTTCCAAGAAAGGGT-pool21	43906	15602	19138	0	22315	4.3486	0.35535	0.435886	0	43906	10x	tenx_B73	B73	NA	5.00411	-1.76898	0.101923	singlet	13	Bundle_sheath
CB:Z:CTTGAAGAGCAGAGCT-pool21	4484	1717	2137	0	2620	3.4183	0.382917	0.476583	0	4484	10x	tenx_B73	B73	NA	1.92389	4.94111	0.0519231	singlet	3	Axillary_meristem
CB:Z:CATAACGAGTCTGCTA-pool21	6072	2397	3537	0	3318	3.52088	0.394763	0.58251	0	6072	10x	tenx_B73	B73	NA	-2.13579	5.15026	0.1	singlet	9	Vascular_parenchyma_precursor
CB:Z:TGATCAGTCAATTGGC-pool21	17903	5857	6911	0	9970	3.9987	0.327152	0.386025	0	17903	10x	tenx_B73	B73	NA	4.41223	-0.631621	0.0980769	singlet	11	Mesophyll
CB:Z:ACTAGGTGTTGCAGCC-pool21	7492	2322	3071	0	3948	3.59638	0.309931	0.409904	0	7492	10x	tenx_B73	B73	NA	2.1085	-0.815799	0.117308	singlet	11	Mesophyll
CB:Z:GGGCCATCAATGCCAT-pool21	22332	7746	11167	0	11915	4.07609	0.346857	0.500045	0	22332	10x	tenx_B73	B73	NA	-2.07889	5.19888	0.176923	singlet	9	Vascular_parenchyma_precursor
CB:Z:GTCACCTAGTCTGCTA-pool21	5057	2012	2988	0	2772	3.44279	0.397864	0.590864	0	5057	10x	tenx_B73	B73	NA	-2.14479	5.11818	0.128846	singlet	9	Vascular_parenchyma_precursor
CB:Z:CCCTAACTCTGAGTAC-pool21	8590	3209	4305	0	4552	3.6582	0.373574	0.501164	0	8590	10x	tenx_B73	B73	NA	2.13139	-1.22894	0.1	singlet	11	Mesophyll
CB:Z:CGCAGGTCAGTAGGCA-pool21	2080	641	767	0	1233	3.09096	0.308173	0.36875	0	2080	10x	tenx_B73	B73	NA	-1.9701	3.23903	0.0884615	singlet	11	Mesophyll
CB:Z:CAACCAAGTACGCCCA-pool21	1336	463	570	0	778	2.89098	0.346557	0.426647	0	1336	10x	tenx_B73	B73	NA	1.5943	4.38923	0.05	singlet	3	Axillary_meristem
CB:Z:CTCAGAACACAGATGG-pool21	8463	2281	2712	2	4563	3.65925	0.269526	0.320454	0.000236323	8463	10x	tenx_B73	B73	NA	4.56766	-2.01754	0.165385	singlet	13	Bundle_sheath
CB:Z:GTACTTTTCAGAATGA-pool21	18409	5390	7085	2	9732	3.9882	0.292792	0.384866	0.000108643	18409	10x	tenx_B73	B73	NA	3.24931	-1.94927	0.167308	singlet	2	Bundle_sheath
CB:Z:ATCCTCGCATTGTGAC-pool21	35608	11800	15322	4	18031	4.25602	0.331386	0.430297	0.000112334	35608	10x	tenx_B73	B73	NA	0.772663	0.198808	0.1	singlet	5	Ground_meristem
CB:Z:CCGTGAGAGCGTCTGC-pool21	35687	12506	16551	0	17742	4.249	0.350436	0.463782	0	35687	10x	tenx_B73	B73	NA	3.21966	-0.126299	0.0730769	singlet	11	Mesophyll
CB:Z:GTTATTCGTGCTAGTT-pool21	10037	2767	3235	0	5399	3.73231	0.27568	0.322307	0	10037	10x	tenx_B73	B73	NA	-2.32196	2.73847	0.119231	singlet	12	Epidermis
CB:Z:TATCGAGCAATAGTGA-pool21	1418	516	614	0	806	2.90634	0.363893	0.433004	0	1418	10x	tenx_B73	B73	NA	1.29097	3.81169	0.075	singlet	4	Ground_meristem
CB:Z:TGCTTCGCACGATATC-pool21	1592	413	457	0	954	2.97955	0.259422	0.28706	0	1592	10x	tenx_B73	B73	NA	-2.30743	-3.65465	0.0403846	singlet	1	Protoderm
CB:Z:GGTCATAGTACCCACG-pool21	54397	20656	28180	0	26175	4.41789	0.379727	0.518043	0	54397	10x	tenx_B73	B73	NA	3.10588	-0.102739	0.155769	singlet	11	Mesophyll
CB:Z:TTGTTCAGTGGCGCTT-pool21	9636	2978	3727	0	5225	3.71809	0.309049	0.386779	0	9636	10x	tenx_B73	B73	NA	3.05977	-0.531942	0.0634615	singlet	11	Mesophyll
CB:Z:GCTGCGATCCATAGGT-pool21	45761	13704	17108	0	23460	4.37033	0.299469	0.373855	0	45761	10x	tenx_B73	B73	NA	1.07573	-0.232039	0.176923	singlet	5	Ground_meristem
CB:Z:CCTTAATAGGAACCGT-pool21	3876	1301	1719	0	2180	3.33846	0.335655	0.443498	0	3876	10x	tenx_B73	B73	NA	3.59207	-1.10691	0.0903846	singlet	11	Mesophyll
CB:Z:GTGACATGTCTGAGCC-pool21	9121	2648	3246	0	4947	3.69434	0.290319	0.355882	0	9121	10x	tenx_B73	B73	NA	3.21571	1.88746	0.142308	singlet	6	Vascular_parenchyma
CB:Z:ACTATTCCACGCGCAT-pool21	3704	1208	1545	0	2121	3.32654	0.326134	0.417117	0	3704	10x	tenx_B73	B73	NA	2.16317	4.70249	0.0865385	singlet	3	Axillary_meristem
CB:Z:GTGCTGGCAGAACGAC-pool21	42171	14368	19438	2	20690	4.31576	0.340708	0.460933	4.7426e-05	42171	10x	tenx_B73	B73	NA	2.55009	0.167675	0.105769	singlet	11	Mesophyll
CB:Z:AACGTACGTGGATTTC-pool21	90196	21618	28361	4	44567	4.64901	0.239678	0.314437	4.43479e-05	90196	10x	tenx_B73	B73	NA	0.930425	0.530963	0.182692	singlet	5	Ground_meristem
CB:Z:TCAAGCACAGGGTACA-pool21	65154	15231	15741	2	35380	4.54876	0.233769	0.241597	3.06965e-05	65154	10x	tenx_B73	B73	NA	0.6825	1.03802	0.107692	singlet	5	Ground_meristem
CB:Z:TTATGTCTCATCGCCT-pool21	5290	1696	2109	0	3042	3.48316	0.320605	0.398677	0	5290	10x	tenx_B73	B73	NA	2.05981	5.03745	0.107692	singlet	3	Axillary_meristem
CB:Z:ACTTTCAAGGACTAGC-pool21	35629	9764	12334	2	18332	4.26321	0.274046	0.346179	5.6134e-05	35629	10x	tenx_B73	B73	NA	1.84453	0.226388	0.175	singlet	11	Mesophyll
CB:Z:CATAACGAGGTCCTCG-pool21	5160	2283	3392	0	2709	3.43281	0.442442	0.657364	0	5160	10x	tenx_B73	B73	NA	-1.98247	-1.83571	0.128846	singlet	4	Ground_meristem
CB:Z:AAGATAGTCGTGATAC-pool21	56214	17555	19911	0	28042	4.44781	0.312289	0.3542	0	56214	10x	tenx_B73	B73	NA	4.61652	-1.54242	0.0923077	singlet	13	Bundle_sheath
CB:Z:GCATTGATCAAGAGAT-pool21	52906	17368	21678	2	25882	4.413	0.32828	0.409746	3.78029e-05	52906	10x	tenx_B73	B73	NA	2.46948	0.143998	0.151923	singlet	11	Mesophyll
CB:Z:GCATTGATCGAGTGTT-pool21	4780	1644	2153	0	2757	3.44044	0.343933	0.450418	0	4780	10x	tenx_B73	B73	NA	3.07248	-0.222507	0.0692308	singlet	11	Mesophyll
CB:Z:TCAAAGCCAACTAGAA-pool21	5639	1925	2301	0	3148	3.49803	0.341373	0.408051	0	5639	10x	tenx_B73	B73	NA	-1.5785	-1.46017	0.121154	singlet	4	Ground_meristem
CB:Z:TATTGCTTCTCTTCTC-pool21	45332	16265	21881	2	21824	4.33893	0.358797	0.482683	4.41189e-05	45332	10x	tenx_B73	B73	NA	4.49813	-0.532527	0.0788462	singlet	13	Bundle_sheath
CB:Z:TTGCACCAGCTACGCC-pool21	15689	3172	3405	0	8616	3.93531	0.20218	0.217031	0	15689	10x	tenx_B73	B73	NA	4.39726	-1.75983	0.0903846	singlet	13	Bundle_sheath
CB:Z:CAAGAAAAGAGGAACA-pool21	22993	7266	9582	0	11685	4.06763	0.316009	0.416736	0	22993	10x	tenx_B73	B73	NA	-1.76634	2.05574	0.180769	singlet	5	Ground_meristem
CB:Z:GTAGTACGTTTGCGAT-pool21	18466	5585	5455	2	10698	4.0293	0.302448	0.295408	0.000108307	18466	10x	tenx_B73	B73	NA	1.40507	4.24865	0.0807692	singlet	3	Axillary_meristem
CB:Z:CCCTCTCTCTAAACGC-pool21	64421	24525	31707	2	30203	4.48005	0.380699	0.492184	3.10458e-05	64421	10x	tenx_B73	B73	NA	-1.85937	5.16969	0.196154	singlet	9	Vascular_parenchyma_precursor
CB:Z:TAATCGGGTGTAGGAC-pool21	1293	340	458	0	731	2.86392	0.262954	0.354215	0	1293	10x	tenx_B73	B73	NA	0.0347328	-2.32405	0.0903846	singlet	7	Ground_meristem
CB:Z:TTACCCGCAGGGAGTT-pool21	35440	11824	15841	2	17735	4.24883	0.333634	0.446981	5.64334e-05	35440	10x	tenx_B73	B73	NA	-1.90765	5.09748	0.192308	singlet	9	Vascular_parenchyma_precursor
CB:Z:TGACTCCCAGGTCTGC-pool21	11861	3129	4259	0	6212	3.79323	0.263806	0.359076	0	11861	10x	tenx_B73	B73	NA	3.83689	-1.88284	0.107692	singlet	13	Bundle_sheath
CB:Z:ACTGCGGTCCTCCTGA-pool21	35178	13942	18157	0	16954	4.22927	0.396327	0.516146	0	35178	10x	tenx_B73	B73	NA	4.90768	-1.97895	0.136538	singlet	13	Bundle_sheath
CB:Z:TTACCCGTCGGGATCC-pool21	39527	11850	14466	0	20138	4.30402	0.299795	0.365978	0	39527	10x	tenx_B73	B73	NA	0.911863	0.469216	0.165385	singlet	5	Ground_meristem
CB:Z:TAGGAGGGTAGAACGC-pool21	15409	3562	3592	0	8613	3.93515	0.231164	0.233111	0	15409	10x	tenx_B73	B73	NA	0.905525	0.583322	0.180769	singlet	5	Ground_meristem
CB:Z:GAGATTCGTTTAGAAG-pool21	29835	10054	14578	0	14805	4.17041	0.336987	0.488621	0	29835	10x	tenx_B73	B73	NA	1.73304	0.194507	0.173077	singlet	11	Mesophyll
CB:Z:CTCGCTAGTGAGCTAG-pool21	2810	1023	1298	0	1563	3.19396	0.364057	0.461922	0	2810	10x	tenx_B73	B73	NA	-2.01397	4.60438	0.115385	singlet	9	Vascular_parenchyma_precursor
CB:Z:TACGCCTGTGAGCTAG-pool21	2242	836	1247	0	1227	3.08884	0.372881	0.5562	0	2242	10x	tenx_B73	B73	NA	-2.05376	5.17722	0.109615	singlet	9	Vascular_parenchyma_precursor
CB:Z:TGGCGCATCCTTACGC-pool21	13907	4121	5487	0	7338	3.86558	0.296326	0.39455	0	13907	10x	tenx_B73	B73	NA	0.733038	0.440393	0.126923	singlet	5	Ground_meristem
CB:Z:CTCATGCCACCTGTGG-pool21	45606	11671	13721	0	23692	4.3746	0.255909	0.30086	0	45606	10x	tenx_B73	B73	NA	1.84427	0.21563	0.15	singlet	11	Mesophyll
CB:Z:GATTGACAGTTAGAGT-pool21	3170	1293	1620	0	1835	3.26364	0.407886	0.511041	0	3170	10x	tenx_B73	B73	NA	-2.35103	-0.675625	0.113462	singlet	12	Epidermis
CB:Z:TTTGAGGGTACGAGAC-pool21	66105	19737	25736	0	32791	4.51575	0.29857	0.38932	0	66105	10x	tenx_B73	B73	NA	0.741853	0.551976	0.132692	singlet	5	Ground_meristem
CB:Z:CAACGGCAGTCAGGAC-pool21	1146	484	645	0	690	2.83885	0.422339	0.562827	0	1146	10x	tenx_B73	B73	NA	-2.56674	-4.55576	0.119231	singlet	14	Procabium
CB:Z:AACAGTCGTGATAGAT-pool21	1041	451	533	0	566	2.75282	0.433237	0.512008	0	1041	10x	tenx_B73	B73	NA	-2.46215	-2.65787	0.173077	singlet	4	Ground_meristem
CB:Z:GGTCATAGTATTCTTC-pool21	33790	7638	9662	0	17770	4.24969	0.226043	0.285943	0	33790	10x	tenx_B73	B73	NA	4.34593	-1.94037	0.142308	singlet	13	Bundle_sheath
CB:Z:TTTGGCCAGTAGAAGG-pool21	7016	3029	4604	0	3694	3.5675	0.431727	0.656214	0	7016	10x	tenx_B73	B73	NA	-1.52996	-1.43815	0.130769	singlet	4	Ground_meristem
CB:Z:ACATGGTCAGGAGCAT-pool21	6530	2653	3555	0	3509	3.54518	0.406279	0.54441	0	6530	10x	tenx_B73	B73	NA	-2.17352	5.14256	0.121154	singlet	9	Vascular_parenchyma_precursor
CB:Z:ACATGGTGTGAGGGTT-pool21	2235	727	970	0	1235	3.09167	0.32528	0.434004	0	2235	10x	tenx_B73	B73	NA	-2.16132	5.03316	0.0538462	singlet	9	Vascular_parenchyma_precursor
CB:Z:ACTAGGTTCAGTCAAC-pool21	4166	1281	1396	0	2381	3.37676	0.307489	0.335094	0	4166	10x	tenx_B73	B73	NA	-0.636732	4.28464	0.0615385	singlet	9	Vascular_parenchyma_precursor
CB:Z:CCCTAACAGCTAACAA-pool21	2473	591	1056	0	1277	3.10619	0.238981	0.427012	0	2473	10x	tenx_B73	B73	NA	1.19717	0.593377	0.0846154	singlet	5	Ground_meristem
CB:Z:GCGCCAATCTTGTCGC-pool21	1164	266	268	0	628	2.79796	0.228522	0.230241	0	1164	10x	tenx_B73	B73	NA	1.32633	-0.548062	0.142308	singlet	5	Ground_meristem
CB:Z:GCGAGAACACAAGGGT-pool21	44663	13211	17753	4	21680	4.33606	0.295793	0.397488	8.95596e-05	44663	10x	tenx_B73	B73	NA	2.61405	-0.0503078	0.117308	singlet	11	Mesophyll
CB:Z:CACAGATAGATGCGAC-pool21	4599	1691	2252	2	2796	3.44654	0.367689	0.489672	0.000434877	4599	10x	tenx_B73	B73	NA	2.25908	5.68086	0.0942308	singlet	3	Axillary_meristem
CB:Z:ACAAACCCAAATTCCG-pool21	39847	12286	16815	0	19789	4.29642	0.308329	0.421989	0	39847	10x	tenx_B73	B73	NA	4.33512	-2.00696	0.153846	singlet	13	Bundle_sheath
CB:Z:GGGAACATCTTCTTCC-pool21	6604	1608	2220	0	3517	3.54617	0.243489	0.33616	0	6604	10x	tenx_B73	B73	NA	2.21357	-1.08075	0.0961538	singlet	11	Mesophyll
CB:Z:ACTGCGGGTGAATGTA-pool21	22596	5187	6025	0	12008	4.07947	0.229554	0.26664	0	22596	10x	tenx_B73	B73	NA	-1.52138	1.12705	0.125	singlet	12	Epidermis
CB:Z:GTTATGGCATTGAACC-pool21	1618	326	360	0	861	2.935	0.201483	0.222497	0	1618	10x	tenx_B73	B73	NA	-0.372054	2.24203	0.105769	singlet	1	Protoderm
CB:Z:GCTGAGCGTAGCGTTT-pool21	1558	383	372	0	907	2.95761	0.245828	0.238768	0	1558	10x	tenx_B73	B73	NA	-1.79254	0.0864582	0.025	singlet	12	Epidermis
CB:Z:TCAAAGCTCATTCGGA-pool21	5511	2160	3096	0	3079	3.48841	0.391943	0.561786	0	5511	10x	tenx_B73	B73	NA	-1.57294	-1.24022	0.0865385	singlet	4	Ground_meristem
CB:Z:CATGTTTAGGGTTCTT-pool21	3646	974	969	0	2147	3.33183	0.267142	0.265771	0	3646	10x	tenx_B73	B73	NA	-2.03268	5.20504	0.140385	singlet	9	Vascular_parenchyma_precursor
CB:Z:TACCTCGTCAATTGGC-pool21	8532	2768	3261	0	4800	3.68124	0.324426	0.382208	0	8532	10x	tenx_B73	B73	NA	4.39882	-1.30637	0.0903846	singlet	11	Mesophyll
CB:Z:GCGTAGCCATAGCCGC-pool21	30490	7906	8996	0	16048	4.20542	0.259298	0.295048	0	30490	10x	tenx_B73	B73	NA	1.02203	0.555088	0.107692	singlet	5	Ground_meristem
CB:Z:AGTGCGCTCCATCATT-pool21	64605	19583	23658	2	32730	4.51495	0.303119	0.366195	3.09574e-05	64605	10x	tenx_B73	B73	NA	4.42049	-1.72838	0.186538	singlet	13	Bundle_sheath
CB:Z:GTCACAAAGAACAGGA-pool21	14176	3656	4228	0	7600	3.88081	0.257901	0.298251	0	14176	10x	tenx_B73	B73	NA	0.848127	0.452001	0.165385	singlet	5	Ground_meristem
CB:Z:AGCCTGGTCTTCCAGC-pool21	13552	4666	5857	0	7081	3.85009	0.344303	0.432187	0	13552	10x	tenx_B73	B73	NA	4.36621	-0.281793	0.0615385	singlet	13	Bundle_sheath
CB:Z:TTTGCGCAGGCATGCA-pool21	53688	18254	24042	4	26429	4.42208	0.340001	0.44781	7.45045e-05	53688	10x	tenx_B73	B73	NA	-1.61505	5.19607	0.125	singlet	9	Vascular_parenchyma_precursor
CB:Z:GGAACCCAGTAACTCC-pool21	5479	2439	3107	0	2977	3.47378	0.445154	0.567074	0	5479	10x	tenx_B73	B73	NA	-1.99827	4.75063	0.1	singlet	9	Vascular_parenchyma_precursor
CB:Z:ACAAACCTCGGACGAA-pool21	35077	11873	15171	0	17678	4.24743	0.338484	0.432506	0	35077	10x	tenx_B73	B73	NA	-1.80279	5.15511	0.176923	singlet	9	Vascular_parenchyma_precursor
CB:Z:CCACGTTGTCAGGCTC-pool21	11123	2647	3024	0	5897	3.77063	0.237975	0.271869	0	11123	10x	tenx_B73	B73	NA	3.00908	1.42936	0.146154	singlet	5	Ground_meristem
CB:Z:ACTCGGGTCACTGATG-pool21	30497	6313	7895	0	16179	4.20895	0.207004	0.258878	0	30497	10x	tenx_B73	B73	NA	-1.90988	5.108	0.134615	singlet	9	Vascular_parenchyma_precursor
CB:Z:AGCGTATGTAAACGTA-pool21	30136	9168	11560	0	15026	4.17684	0.304221	0.383594	0	30136	10x	tenx_B73	B73	NA	2.33345	0.24943	0.153846	singlet	11	Mesophyll
CB:Z:CTCTACGTCTAGCTGA-pool21	20248	4668	5001	2	10991	4.04104	0.230541	0.246987	9.87752e-05	20248	10x	tenx_B73	B73	NA	0.977176	0.447855	0.169231	singlet	5	Ground_meristem
CB:Z:TACTGCCGTTGGCGAA-pool21	20567	5947	7795	2	10659	4.02772	0.289153	0.379005	9.72432e-05	20567	10x	tenx_B73	B73	NA	2.56858	-0.0931123	0.119231	singlet	11	Mesophyll
CB:Z:GTGTCAAAGGCACTAG-pool21	51230	15268	19534	0	25796	4.41155	0.298028	0.3813	0	51230	10x	tenx_B73	B73	NA	1.2951	0.340906	0.132692	singlet	5	Ground_meristem
CB:Z:ACTGTCCAGTGAAGGA-pool21	58036	16744	18637	0	29860	4.47509	0.288511	0.321128	0	58036	10x	tenx_B73	B73	NA	-1.82446	1.70478	0.109615	singlet	12	Epidermis
CB:Z:CTCAGCTAGGTTAACA-pool21	20316	4977	5749	0	10883	4.03675	0.244979	0.282979	0	20316	10x	tenx_B73	B73	NA	0.462131	1.61916	0.144231	singlet	11	Mesophyll
CB:Z:ATCCCTGAGTGATAAC-pool21	12291	2888	3444	2	6601	3.81961	0.234969	0.280205	0.000162721	12291	10x	tenx_B73	B73	NA	0.937004	0.540157	0.161538	singlet	5	Ground_meristem
CB:Z:TATTGCTCATTACTCT-pool21	48309	12194	13624	0	25062	4.39902	0.252417	0.282018	0	48309	10x	tenx_B73	B73	NA	0.990572	0.425775	0.163462	singlet	5	Ground_meristem
CB:Z:GTAGACTCAGATACAA-pool21	34156	9145	13398	0	17234	4.23639	0.267742	0.392259	0	34156	10x	tenx_B73	B73	NA	0.873832	-0.234339	0.128846	singlet	5	Ground_meristem
CB:Z:GCAGATTCAATAGTGA-pool21	17386	4441	4679	0	9830	3.99255	0.255435	0.269125	0	17386	10x	tenx_B73	B73	NA	0.796251	0.497411	0.142308	singlet	5	Ground_meristem
CB:Z:GTGTCAACAACGGACA-pool21	21693	6282	8073	4	11425	4.05786	0.289587	0.372148	0.000184391	21693	10x	tenx_B73	B73	NA	0.5625	-0.664751	0.103846	singlet	5	Ground_meristem
CB:Z:GGGTTATCACACACCG-pool21	13333	4763	6525	0	7423	3.87058	0.357234	0.489387	0	13333	10x	tenx_B73	B73	NA	-1.18206	-1.72609	0.153846	singlet	4	Ground_meristem
CB:Z:AGCGTATTCCACGAGC-pool21	18353	5946	8125	0	9337	3.97021	0.32398	0.442707	0	18353	10x	tenx_B73	B73	NA	-1.76325	5.23788	0.119231	singlet	9	Vascular_parenchyma_precursor
CB:Z:GAAGTGGAGTTCAACC-pool21	45401	14216	18606	0	22747	4.35692	0.313121	0.409815	0	45401	10x	tenx_B73	B73	NA	1.97469	0.194612	0.107692	singlet	11	Mesophyll
CB:Z:GCGCCAATCTGTGTGA-pool21	15055	3724	5570	0	7989	3.90249	0.24736	0.369977	0	15055	10x	tenx_B73	B73	NA	1.02031	0.155877	0.192308	singlet	5	Ground_meristem
CB:Z:AGCCCGAGTAATGTAG-pool21	20553	7142	8771	0	10608	4.02563	0.347492	0.42675	0	20553	10x	tenx_B73	B73	NA	1.0393	-0.943473	0.107692	singlet	7	Ground_meristem
CB:Z:CCTTGCATCTCTATTG-pool21	63375	24688	32303	0	28600	4.45637	0.389554	0.509712	0	63375	10x	tenx_B73	B73	NA	-1.75173	5.25293	0.136538	singlet	9	Vascular_parenchyma_precursor
CB:Z:GATTGACCACCCTTTG-pool21	15108	4879	6026	2	7964	3.90113	0.322941	0.398862	0.00013238	15108	10x	tenx_B73	B73	NA	2.3999	-0.168275	0.136538	singlet	11	Mesophyll
CB:Z:CGAGTTAAGTCCGATT-pool21	18469	4166	4900	0	10170	4.00732	0.225567	0.265309	0	18469	10x	tenx_B73	B73	NA	-1.61758	5.17735	0.126923	singlet	9	Vascular_parenchyma_precursor
CB:Z:GACTAGTCAAGTAACA-pool21	2947	1310	1668	0	1589	3.20112	0.44452	0.565999	0	2947	10x	tenx_B73	B73	NA	-2.27631	-1.88642	0.117308	singlet	4	Ground_meristem
CB:Z:GTAGGAGGTATACGCT-pool21	37776	12900	15410	0	18949	4.27759	0.341487	0.407931	0	37776	10x	tenx_B73	B73	NA	-1.60934	5.20573	0.119231	singlet	9	Vascular_parenchyma_precursor
CB:Z:GCCTACTGTGTGCGTC-pool21	27061	6547	5646	0	18217	4.26048	0.241935	0.20864	0	27061	10x	tenx_B73	B73	NA	0.797695	-0.455362	0.138462	singlet	5	Ground_meristem
CB:Z:GTAATCGCAAGGGTAC-pool21	28234	9363	12017	0	14337	4.15646	0.331621	0.425622	0	28234	10x	tenx_B73	B73	NA	3.30271	1.93996	0.126923	singlet	6	Vascular_parenchyma
CB:Z:TTCGGTCTCGACTTAG-pool21	43305	9592	11026	6	22748	4.35694	0.221499	0.254613	0.000138552	43305	10x	tenx_B73	B73	NA	1.17337	0.256307	0.186538	singlet	5	Ground_meristem
CB:Z:AACAAAGAGATCTAAG-pool21	9679	3193	4100	0	5043	3.70269	0.329889	0.423597	0	9679	10x	tenx_B73	B73	NA	0.94315	0.402766	0.165385	singlet	5	Ground_meristem
CB:Z:GGCATTATCGCCGAAC-pool21	42825	13384	16070	2	21860	4.33965	0.312528	0.375248	4.67017e-05	42825	10x	tenx_B73	B73	NA	2.42459	0.0229381	0.125	singlet	11	Mesophyll
CB:Z:TCTAGTTCAGTTGCAT-pool21	4592	1048	1247	0	2455	3.39005	0.228223	0.271559	0	4592	10x	tenx_B73	B73	NA	1.05833	0.548851	0.119231	singlet	5	Ground_meristem
CB:Z:ACTTTCACAACGGGTA-pool21	38884	13033	18621	0	19287	4.28526	0.335176	0.478886	0	38884	10x	tenx_B73	B73	NA	1.82531	0.141783	0.1	singlet	5	Ground_meristem
CB:Z:TATGTGGCAAATTCCG-pool21	7513	2235	2495	0	4104	3.61321	0.297484	0.332091	0	7513	10x	tenx_B73	B73	NA	-2.19209	1.34191	0.134615	singlet	12	Epidermis
CB:Z:AGGACGAAGTCAACTC-pool21	17975	6717	7203	0	9014	3.95492	0.373686	0.400723	0	17975	10x	tenx_B73	B73	NA	-1.58588	5.10215	0.1	singlet	10	Xylem
CB:Z:ATTACTCAGTGCCCTG-pool21	2252	574	480	0	1337	3.12613	0.254885	0.213144	0	2252	10x	tenx_B73	B73	NA	-2.42209	-4.26635	0.128846	singlet	1	Protoderm
CB:Z:CCTAAAGTCCAATAGC-pool21	2432	1012	1486	0	1318	3.11992	0.416118	0.61102	0	2432	10x	tenx_B73	B73	NA	-1.63434	-1.24876	0.140385	singlet	4	Ground_meristem
CB:Z:ACTATTCGTAGGTAAT-pool21	3448	785	1024	0	1885	3.27531	0.227668	0.296984	0	3448	10x	tenx_B73	B73	NA	1.16637	0.558507	0.0423077	singlet	5	Ground_meristem
CB:Z:CTGGCAGCACGTTGTA-pool21	3094	860	1122	0	1616	3.20844	0.277957	0.362637	0	3094	10x	tenx_B73	B73	NA	-1.69185	5.22079	0.138462	singlet	9	Vascular_parenchyma_precursor
CB:Z:ATGTCTTAGAGCTGTG-pool21	3548	912	994	0	2019	3.30514	0.257046	0.280158	0	3548	10x	tenx_B73	B73	NA	4.84537	-1.97887	0.0826923	singlet	13	Bundle_sheath
CB:Z:CAGGGCTAGAGAATTC-pool21	7769	2768	3981	0	3882	3.58906	0.356288	0.512421	0	7769	10x	tenx_B73	B73	NA	-1.59414	5.39419	0.0673077	singlet	9	Vascular_parenchyma_precursor
CB:Z:GGGAACAGTTTAAGGA-pool21	2367	569	621	0	1366	3.13545	0.240389	0.262357	0	2367	10x	tenx_B73	B73	NA	-0.400303	2.93908	0.0326923	singlet	9	Vascular_parenchyma_precursor
CB:Z:TGCTATTGTAACCCAT-pool21	5677	2067	2854	0	3289	3.51706	0.364101	0.50273	0	5677	10x	tenx_B73	B73	NA	-1.44366	-2.34746	0.111538	singlet	4	Ground_meristem
CB:Z:CGTTCCATCCATACGA-pool21	17300	6285	8454	0	9849	3.99339	0.363295	0.488671	0	17300	10x	tenx_B73	B73	NA	2.30943	5.60206	0.153846	singlet	3	Axillary_meristem
CB:Z:TTGCAGAAGGCGACTA-pool21	28195	8845	9632	0	15189	4.18153	0.313708	0.341621	0	28195	10x	tenx_B73	B73	NA	3.05346	1.44562	0.123077	singlet	5	Ground_meristem
CB:Z:AGTTTGGGTATTTGCG-pool21	1024	363	462	0	586	2.7679	0.354492	0.451172	0	1024	10x	tenx_B73	B73	NA	0.737077	-1.61656	0.123077	singlet	7	Ground_meristem
CB:Z:TTCATCACAAGGTTCT-pool21	16954	6394	8665	0	9609	3.98268	0.377138	0.511089	0	16954	10x	tenx_B73	B73	NA	2.21762	5.77966	0.105769	singlet	3	Axillary_meristem
CB:Z:TATGTGGGTGAGTTGG-pool21	4004	1207	1391	0	2306	3.36286	0.301449	0.347403	0	4004	10x	tenx_B73	B73	NA	2.24399	5.05456	0.0557692	singlet	3	Axillary_meristem
CB:Z:CTGGGACCAAGGCTTT-pool21	24278	8598	10780	0	13754	4.13843	0.354148	0.444023	0	24278	10x	tenx_B73	B73	NA	2.25399	5.73751	0.113462	singlet	3	Axillary_meristem
CB:Z:GCTCACTCACTGTCAA-pool21	2907	1114	1623	0	1606	3.20575	0.383213	0.558308	0	2907	10x	tenx_B73	B73	NA	1.42302	-1.59178	0.0423077	singlet	7	Ground_meristem
CB:Z:AGGCCCAGTTGGACGA-pool21	37665	16926	22750	0	16863	4.22693	0.449383	0.604009	0	37665	10x	tenx_B73	B73	NA	-1.96519	5.17803	0.148077	singlet	9	Vascular_parenchyma_precursor
CB:Z:CGTTCCATCTGGCACG-pool21	11469	4355	6074	0	6043	3.78125	0.379719	0.529602	0	11469	10x	tenx_B73	B73	NA	3.0139	-0.625052	0.0692308	singlet	11	Mesophyll
CB:Z:TGCATTTCAGTTAAAG-pool21	15690	5966	8053	0	8938	3.95124	0.380242	0.513257	0	15690	10x	tenx_B73	B73	NA	2.26787	5.69535	0.101923	singlet	3	Axillary_meristem
CB:Z:TGAGTCATCACTTACT-pool21	8291	2646	3139	0	4702	3.67228	0.319141	0.378603	0	8291	10x	tenx_B73	B73	NA	1.97275	4.68247	0.075	singlet	3	Axillary_meristem
CB:Z:GCTCGAGCAGTGGTCC-pool21	2443	870	1309	0	1324	3.12189	0.35612	0.535817	0	2443	10x	tenx_B73	B73	NA	-1.63227	5.67433	0.1	singlet	9	Vascular_parenchyma_precursor
CB:Z:TGGTCAAGTCCTTATT-pool21	7006	2594	2955	0	4074	3.61002	0.370254	0.421781	0	7006	10x	tenx_B73	B73	NA	2.57912	-0.38296	0.136538	singlet	11	Mesophyll
CB:Z:TAATTCCTCTGTAGAC-pool21	22245	8115	11081	2	12549	4.09861	0.364801	0.498134	8.99078e-05	22245	10x	tenx_B73	B73	NA	2.22929	5.76766	0.113462	singlet	3	Axillary_meristem
CB:Z:CGCTGGACATTTGGTG-pool21	3676	1481	1971	0	1983	3.29732	0.402884	0.536181	0	3676	10x	tenx_B73	B73	NA	-1.28646	-4.01529	0.126923	singlet	14	Procabium
CB:Z:GGGTTATTCAGCACTA-pool21	21029	7224	9094	0	12018	4.07983	0.343526	0.43245	0	21029	10x	tenx_B73	B73	NA	-0.652247	4.71878	0.0826923	singlet	9	Vascular_parenchyma_precursor
CB:Z:GGTCATATCTACTTTG-pool21	24608	5394	5755	2	13647	4.13504	0.219197	0.233867	8.12744e-05	24608	10x	tenx_B73	B73	NA	2.22028	-0.122108	0.180769	singlet	11	Mesophyll
CB:Z:CGGACTGCATTACTCT-pool21	50513	17446	20986	0	25598	4.40821	0.345376	0.415457	0	50513	10x	tenx_B73	B73	NA	2.35056	0.151637	0.169231	singlet	11	Mesophyll
CB:Z:TGCATGAAGGCATGCA-pool21	16129	4762	5285	2	8670	3.93802	0.295245	0.327671	0.000124	16129	10x	tenx_B73	B73	NA	-1.76373	5.16496	0.140385	singlet	5	Ground_meristem
CB:Z:GTAGACTGTATCTAGC-pool21	14678	2961	3395	0	7243	3.85992	0.20173	0.231299	0	14678	10x	tenx_B73	B73	NA	5.01995	-1.93088	0.103846	singlet	13	Bundle_sheath
CB:Z:GCACGGTTCAGCACGC-pool21	5335	1807	2336	2	3110	3.49276	0.338707	0.437863	0.000374883	5335	10x	tenx_B73	B73	NA	2.15392	5.5416	0.0884615	singlet	3	Axillary_meristem
CB:Z:TGCTATTAGACTAGCG-pool21	47418	16830	23279	0	23022	4.36214	0.354929	0.490932	0	47418	10x	tenx_B73	B73	NA	3.93178	-1.80353	0.103846	singlet	13	Bundle_sheath
CB:Z:ACAAAGACAGCAATGG-pool21	29659	7256	8792	0	15839	4.19973	0.244647	0.296436	0	29659	10x	tenx_B73	B73	NA	0.885185	-0.0216982	0.136538	singlet	5	Ground_meristem
CB:Z:GGATAGGCAACGTACT-pool21	1470	363	332	0	873	2.94101	0.246939	0.22585	0	1470	10x	tenx_B73	B73	NA	-1.75324	-3.2166	0.0826923	singlet	1	Protoderm
CB:Z:CTTGTCGGTAAACGTA-pool21	80593	26188	33923	4	38576	4.58632	0.324941	0.420917	4.96321e-05	80593	10x	tenx_B73	B73	NA	1.66222	0.0294725	0.146154	singlet	11	Mesophyll
CB:Z:TTCAACTCATCGCCTT-pool21	32870	12111	15101	2	16145	4.20804	0.368451	0.459416	6.08458e-05	32870	10x	tenx_B73	B73	NA	-2.29778	3.03105	0.142308	singlet	12	Epidermis
CB:Z:AAAGATGGTGGTACTT-pool21	8054	2544	2859	0	4681	3.67034	0.315868	0.354979	0	8054	10x	tenx_B73	B73	NA	-2.20508	-4.82691	0.0653846	singlet	3	Axillary_meristem
CB:Z:GAAGTGGAGTACGACG-pool21	3368	1525	2067	0	1802	3.25575	0.452791	0.613717	0	3368	10x	tenx_B73	B73	NA	-2.25407	-1.86857	0.111538	singlet	4	Ground_meristem
CB:Z:TACTCGCGTTATAGAG-pool21	7003	2311	2731	0	4034	3.60574	0.330001	0.389976	0	7003	10x	tenx_B73	B73	NA	-0.717975	4.79398	0.0692308	singlet	9	Vascular_parenchyma_precursor
CB:Z:GCGTAGCTCGGAGTTT-pool21	31392	11006	14775	4	17433	4.24137	0.350599	0.470661	0.000127421	31392	10x	tenx_B73	B73	NA	2.18483	5.79148	0.0942308	singlet	3	Axillary_meristem
CB:Z:GGGACCTGTCTGAGCC-pool21	3206	1011	1269	0	1763	3.24625	0.315346	0.39582	0	3206	10x	tenx_B73	B73	NA	2.81539	-0.472574	0.0596154	singlet	11	Mesophyll
CB:Z:CACATGACAAACCCTA-pool21	5741	1936	2226	0	3306	3.5193	0.337223	0.387737	0	5741	10x	tenx_B73	B73	NA	2.08942	4.84083	0.0557692	singlet	3	Axillary_meristem
CB:Z:TGCACCTCACGATTAC-pool21	2361	682	806	0	1382	3.14051	0.288861	0.341381	0	2361	10x	tenx_B73	B73	NA	-2.01261	-4.95926	0.0442308	singlet	14	Procabium
CB:Z:GTGACATGTCGCGCTA-pool21	4017	1167	1465	0	2214	3.34518	0.290515	0.3647	0	4017	10x	tenx_B73	B73	NA	3.19227	1.93661	0.0980769	singlet	6	Vascular_parenchyma
CB:Z:GTTACGACATTGTGAC-pool21	7754	2989	3908	0	4547	3.65772	0.385478	0.503998	0	7754	10x	tenx_B73	B73	NA	2.23129	5.70532	0.0923077	singlet	3	Axillary_meristem
CB:Z:CAAGCTAAGGTCGTTT-pool21	1083	224	221	0	633	2.8014	0.206833	0.204063	0	1083	10x	tenx_B73	B73	NA	-1.03635	5.58022	0.144231	singlet	10	Xylem
CB:Z:TGCTTTATCTGATCCC-pool21	30904	8678	11204	4	15505	4.19047	0.280805	0.362542	0.000129433	30904	10x	tenx_B73	B73	NA	0.768143	0.523595	0.171154	singlet	5	Ground_meristem
CB:Z:TTCGCGTCAAGCTTTG-pool21	2048	678	799	0	1194	3.077	0.331055	0.390137	0	2048	10x	tenx_B73	B73	NA	-1.11567	-1.87735	0.0692308	singlet	7	Ground_meristem
CB:Z:GGTGTCGGTCTCAAAC-pool21	67304	27342	37336	2	30624	4.48606	0.406246	0.554737	2.97159e-05	67304	10x	tenx_B73	B73	NA	-1.32923	5.47397	0.0961538	singlet	9	Vascular_parenchyma_precursor
CB:Z:TTCGTTACAGTTGCAT-pool21	4578	1390	1715	0	2598	3.41464	0.303626	0.374618	0	4578	10x	tenx_B73	B73	NA	2.33118	4.93223	0.0961538	singlet	3	Axillary_meristem
CB:Z:TTGCGAATCAGAACGG-pool21	44978	13879	19221	4	22232	4.34698	0.308573	0.427342	8.89324e-05	44978	10x	tenx_B73	B73	NA	1.46323	0.29418	0.182692	singlet	5	Ground_meristem
CB:Z:CAGCCTTAGATTCCGT-pool21	34842	12400	17719	0	16892	4.22768	0.355892	0.508553	0	34842	10x	tenx_B73	B73	NA	2.98494	-0.0511264	0.161538	singlet	11	Mesophyll
CB:Z:AACCGATTCCGTGCAG-pool21	37617	8427	9415	0	20846	4.31902	0.224021	0.250286	0	37617	10x	tenx_B73	B73	NA	0.87124	0.109008	0.138462	singlet	5	Ground_meristem
CB:Z:GTGGCGTAGTTCGCGC-pool21	13338	4342	6016	0	6974	3.84348	0.325536	0.451042	0	13338	10x	tenx_B73	B73	NA	4.98558	-1.96308	0.182692	singlet	13	Bundle_sheath
CB:Z:GTGGATTGTAAACGAT-pool21	5610	2413	3402	0	2963	3.47173	0.430125	0.606417	0	5610	10x	tenx_B73	B73	NA	-2.95594	-3.16575	0.121154	singlet	14	Procabium
CB:Z:TTAACGGCATTCACGA-pool21	2026	881	1246	0	1082	3.03423	0.434847	0.615005	0	2026	10x	tenx_B73	B73	NA	-0.458622	-3.2755	0.119231	singlet	2	Bundle_sheath
CB:Z:GCATTCCTCTCGACAA-pool21	2874	1087	1423	0	1667	3.22194	0.378219	0.495129	0	2874	10x	tenx_B73	B73	NA	-1.66305	5.68721	0.0807692	singlet	9	Vascular_parenchyma_precursor
CB:Z:TTCTGTAAGGTACACG-pool21	18388	4938	6101	0	9707	3.98709	0.268545	0.331792	0	18388	10x	tenx_B73	B73	NA	0.829474	0.146152	0.167308	singlet	5	Ground_meristem
CB:Z:AATACGCAGGATGTAT-pool21	20883	6485	8121	2	10914	4.03798	0.31054	0.388881	9.57717e-05	20883	10x	tenx_B73	B73	NA	0.963951	-0.0741374	0.159615	singlet	5	Ground_meristem
CB:Z:ACTGCGGTCTTGTCGC-pool21	5091	1630	1805	0	2975	3.47349	0.320173	0.354547	0	5091	10x	tenx_B73	B73	NA	4.93005	-1.28095	0.05	singlet	13	Bundle_sheath
CB:Z:CCCTAACTCTTGTCGC-pool21	12471	3785	4301	0	7148	3.85418	0.303504	0.34488	0	12471	10x	tenx_B73	B73	NA	4.98921	-1.30925	0.0596154	singlet	13	Bundle_sheath
CB:Z:CGGACTGGTTGTATCG-pool21	18635	6152	7163	0	10676	4.02841	0.330131	0.384384	0	18635	10x	tenx_B73	B73	NA	3.12604	-2.14917	0.0653846	singlet	2	Bundle_sheath
CB:Z:TGCTCACCATCCATAG-pool21	2575	880	951	0	1309	3.11694	0.341748	0.36932	0	2575	10x	tenx_B73	B73	NA	2.7623	2.28617	0.075	singlet	6	Vascular_parenchyma
CB:Z:GTAGTACGTTGTGAGG-pool21	21384	4576	4528	0	12162	4.085	0.213992	0.211747	0	21384	10x	tenx_B73	B73	NA	2.24918	-0.154004	0.142308	singlet	11	Mesophyll
CB:Z:TCGATTTTCTGCCGAG-pool21	78225	18987	19852	0	42977	4.63324	0.242723	0.253781	0	78225	10x	tenx_B73	B73	NA	0.0582907	0.924061	0.138462	singlet	1	Protoderm
CB:Z:GATGATCTCGCCTTAC-pool21	6156	2448	3113	0	3338	3.52349	0.397661	0.505686	0	6156	10x	tenx_B73	B73	NA	-2.31675	3.18448	0.0807692	singlet	12	Epidermis
CB:Z:TTACCCGAGCCCATGC-pool21	42650	11461	15191	2	21553	4.33351	0.268722	0.356178	4.68933e-05	42650	10x	tenx_B73	B73	NA	1.00376	0.417117	0.194231	singlet	5	Ground_meristem
CB:Z:GTTGGTACAAGCAATA-pool21	5328	1379	1680	0	2827	3.45133	0.258821	0.315315	0	5328	10x	tenx_B73	B73	NA	-2.04481	3.02774	0.0788462	singlet	12	Epidermis
CB:Z:TCACCACAGTGTCACT-pool21	2232	857	1151	0	1321	3.1209	0.383961	0.515681	0	2232	10x	tenx_B73	B73	NA	2.69782	4.1295	0.0711538	singlet	3	Axillary_meristem
CB:Z:CGTACAACACAGTAGG-pool21	3421	1423	1975	0	1920	3.2833	0.41596	0.577317	0	3421	10x	tenx_B73	B73	NA	-2.57122	0.470767	0.140385	singlet	12	Epidermis
CB:Z:CATAACGAGCGAGCTA-pool21	25520	6061	7106	0	13767	4.13884	0.2375	0.278448	0	25520	10x	tenx_B73	B73	NA	2.40539	-0.153221	0.134615	singlet	11	Mesophyll
CB:Z:TAGGTGTCAGCTTACA-pool21	4434	1411	1650	0	2612	3.41697	0.318223	0.372124	0	4434	10x	tenx_B73	B73	NA	2.33042	4.72136	0.0403846	singlet	7	Ground_meristem
CB:Z:GAACGTTTCGCTTACC-pool21	4071	1335	1548	0	2385	3.37749	0.327929	0.380251	0	4071	10x	tenx_B73	B73	NA	4.802	-1.39377	0.0730769	singlet	13	Bundle_sheath
CB:Z:GAGGTCCAGTCGTATC-pool21	12954	3600	4233	0	6985	3.84417	0.277906	0.326772	0	12954	10x	tenx_B73	B73	NA	-3.49688	2.95043	0.105769	singlet	10	Xylem
CB:Z:AGTCAACAGAGTCCGA-pool21	1207	343	459	0	694	2.84136	0.284176	0.380282	0	1207	10x	tenx_B73	B73	NA	-1.08587	-1.32527	0.115385	singlet	4	Ground_meristem
CB:Z:TGCTTCGCAAGTGGCA-pool21	16473	4151	4802	0	8896	3.94919	0.251988	0.291507	0	16473	10x	tenx_B73	B73	NA	0.844055	0.472024	0.148077	singlet	5	Ground_meristem
CB:Z:TCGAGCGAGTCGTATC-pool21	11833	2574	3256	0	6350	3.80277	0.217527	0.275163	0	11833	10x	tenx_B73	B73	NA	-1.64176	0.552832	0.155769	singlet	5	Ground_meristem
CB:Z:CTAGGATAGTTCCAGT-pool21	61406	15702	18840	2	31994	4.50507	0.255708	0.30681	3.25701e-05	61406	10x	tenx_B73	B73	NA	-1.66333	1.29987	0.161538	singlet	5	Ground_meristem
CB:Z:TCACCTGGTGTCTCGG-pool21	17665	3876	4321	0	9731	3.98816	0.219417	0.244608	0	17665	10x	tenx_B73	B73	NA	0.768527	0.357902	0.171154	singlet	5	Ground_meristem
CB:Z:CATGTTTGTATGCTAC-pool21	2330	708	836	2	1338	3.12646	0.303863	0.358798	0.000858369	2330	10x	tenx_B73	B73	NA	2.05501	5.02515	0.105769	singlet	3	Axillary_meristem
CB:Z:AGTTTGGAGACACGGT-pool21	18204	3820	4688	0	9754	3.98918	0.209844	0.257526	0	18204	10x	tenx_B73	B73	NA	-1.65785	5.3476	0.0846154	singlet	9	Vascular_parenchyma_precursor
CB:Z:CCACGTTTCTGTCGGG-pool21	4405	1172	1243	0	2563	3.40875	0.266061	0.282179	0	4405	10x	tenx_B73	B73	NA	2.75996	-0.340514	0.0557692	singlet	11	Mesophyll
CB:Z:TTGTCTAGTCAAACAA-pool21	20178	5819	8074	2	10433	4.01841	0.288383	0.400139	9.91179e-05	20178	10x	tenx_B73	B73	NA	4.76774	-1.83726	0.140385	singlet	13	Bundle_sheath
CB:Z:CCCAGAGTCTCTTCCT-pool21	8433	2609	3538	0	4496	3.65283	0.30938	0.419542	0	8433	10x	tenx_B73	B73	NA	0.998006	0.491153	0.178846	singlet	5	Ground_meristem
CB:Z:GCTTTCGAGTCTCCAA-pool21	2450	786	947	0	1436	3.15715	0.320816	0.386531	0	2450	10x	tenx_B73	B73	NA	1.78944	4.20596	0.0538462	singlet	3	Axillary_meristem
CB:Z:GTCACAATCTTGTCAT-pool21	2463	721	871	0	1298	3.11327	0.292732	0.353634	0	2463	10x	tenx_B73	B73	NA	1.22377	0.260041	0.146154	singlet	5	Ground_meristem
CB:Z:GCAGCTGTCTGGCTAA-pool21	7872	2772	3591	0	4493	3.65254	0.352134	0.456174	0	7872	10x	tenx_B73	B73	NA	2.46783	4.51243	0.0769231	singlet	3	Axillary_meristem
CB:Z:TAATCGGCACGAACGA-pool21	38115	9685	10391	0	20121	4.30365	0.254099	0.272622	0	38115	10x	tenx_B73	B73	NA	2.23878	-0.0892964	0.153846	singlet	11	Mesophyll
CB:Z:GAGGTCCCAGTAACGG-pool21	19364	5501	7815	2	10028	4.00121	0.284084	0.403584	0.000103284	19364	10x	tenx_B73	B73	NA	1.06815	0.198033	0.186538	singlet	5	Ground_meristem
CB:Z:TAACAGCAGTCATACC-pool21	8994	3896	5530	0	4763	3.67788	0.433178	0.614854	0	8994	10x	tenx_B73	B73	NA	-1.43274	-1.48934	0.125	singlet	4	Ground_meristem
CB:Z:CAACGGCGTGCTGTCG-pool21	18533	6205	8317	4	9567	3.98078	0.334808	0.448767	0.000215831	18533	10x	tenx_B73	B73	NA	2.65785	-0.289414	0.0615385	singlet	11	Mesophyll
CB:Z:ACCTGCTGTGCTTCCT-pool21	2723	816	1033	0	1544	3.18865	0.299669	0.379361	0	2723	10x	tenx_B73	B73	NA	1.49107	-1.49926	0.0961538	singlet	7	Ground_meristem
CB:Z:CATTCCGGTCCGTAGC-pool21	37950	13321	19403	0	18587	4.26921	0.351014	0.511278	0	37950	10x	tenx_B73	B73	NA	1.59704	-2.78229	0.0961538	singlet	5	Ground_meristem
CB:Z:CAGTGTAGTGATGCGA-pool21	54589	17479	22229	4	26258	4.41926	0.320193	0.407207	7.32748e-05	54589	10x	tenx_B73	B73	NA	1.03177	-0.226417	0.188462	singlet	5	Ground_meristem
CB:Z:CTGCGTTCATCGCTAA-pool21	2874	591	596	0	1672	3.22324	0.205637	0.207376	0	2874	10x	tenx_B73	B73	NA	2.64447	0.583383	0.0711538	singlet	9	Vascular_parenchyma_precursor
CB:Z:GCCCGAATCAAGGCCC-pool21	42272	11023	12832	2	21408	4.33058	0.260764	0.303558	4.73126e-05	42272	10x	tenx_B73	B73	NA	1.18053	0.281558	0.178846	singlet	5	Ground_meristem
CB:Z:TTTGCGCGTCATTGGT-pool21	2716	921	1010	0	1587	3.20058	0.339102	0.37187	0	2716	10x	tenx_B73	B73	NA	3.22647	-1.81624	0.05	singlet	11	Mesophyll
CB:Z:AGGCCTGGTGCGCTCA-pool21	45272	16489	22734	4	21861	4.33967	0.364221	0.502165	8.83548e-05	45272	10x	tenx_B73	B73	NA	1.07247	0.148495	0.140385	singlet	5	Ground_meristem
CB:Z:TAGACTGCATTAGCCA-pool21	24533	6334	8545	0	12906	4.11079	0.258183	0.348306	0	24533	10x	tenx_B73	B73	NA	1.02771	0.29196	0.165385	singlet	5	Ground_meristem
CB:Z:GCAGATTAGAGCCACA-pool21	18599	4450	4978	0	10037	4.0016	0.23926	0.267649	0	18599	10x	tenx_B73	B73	NA	0.030165	1.78663	0.161538	singlet	1	Protoderm
CB:Z:ATATTCCAGTACAGTA-pool21	13965	3480	3947	0	7653	3.88383	0.249194	0.282635	0	13965	10x	tenx_B73	B73	NA	4.72248	-2.00448	0.103846	singlet	13	Bundle_sheath
CB:Z:AAAGGGCAGAGCCTGA-pool21	2394	565	581	0	1367	3.13577	0.236007	0.24269	0	2394	10x	tenx_B73	B73	NA	0.0288007	1.82255	0.0769231	singlet	1	Protoderm
CB:Z:ATTACTCCATACCCGG-pool21	10957	3081	3629	0	6045	3.7814	0.28119	0.331204	0	10957	10x	tenx_B73	B73	NA	4.60607	-2.12817	0.0923077	singlet	2	Bundle_sheath
CB:Z:GACCGACGTCCAAGAG-pool21	11757	4209	5787	2	6736	3.8284	0.357999	0.492217	0.000170111	11757	10x	tenx_B73	B73	NA	2.2251	5.75236	0.132692	singlet	3	Axillary_meristem
CB:Z:CATGTTTAGTGAAACT-pool21	1223	312	402	0	666	2.82347	0.25511	0.3287	0	1223	10x	tenx_B73	B73	NA	-2.32856	2.74892	0.169231	singlet	12	Epidermis
CB:Z:GAACCGCCAGTTGCAT-pool21	2022	787	932	0	1175	3.07004	0.389219	0.46093	0	2022	10x	tenx_B73	B73	NA	-1.26236	5.1057	0.0673077	singlet	9	Vascular_parenchyma_precursor
CB:Z:TACGGATCATATAGAG-pool21	16504	4709	5649	2	9115	3.95976	0.285325	0.342281	0.000121183	16504	10x	tenx_B73	B73	NA	0.657871	-0.705364	0.128846	singlet	1	Protoderm
CB:Z:AGGCCCAGTCTCTAAG-pool21	1966	675	731	0	1133	3.05423	0.343337	0.371821	0	1966	10x	tenx_B73	B73	NA	-1.49814	-6.09423	0.0961538	singlet	8	Phloem
CB:Z:AGGCGAAAGTTCAGGG-pool21	1004	287	331	0	559	2.74741	0.285857	0.329681	0	1004	10x	tenx_B73	B73	NA	1.97416	-1.0429	0.0711538	singlet	7	Ground_meristem
CB:Z:GAGACTTAGTTCAGGG-pool21	1092	279	364	0	607	2.78319	0.255495	0.333333	0	1092	10x	tenx_B73	B73	NA	1.34156	-1.38929	0.107692	singlet	7	Ground_meristem
CB:Z:GCATTGAAGTTCAGGG-pool21	3744	956	1176	0	2068	3.31555	0.255342	0.314103	0	3744	10x	tenx_B73	B73	NA	1.47198	-1.18681	0.109615	singlet	7	Ground_meristem
CB:Z:TAGACTGAGTTCAGGG-pool21	2383	583	732	0	1339	3.12678	0.24465	0.307176	0	2383	10x	tenx_B73	B73	NA	1.10642	-1.11183	0.0884615	singlet	7	Ground_meristem
CB:Z:TAGGAGGAGGCCTCTG-pool21	4585	938	921	0	2689	3.42959	0.20458	0.200872	0	4585	10x	tenx_B73	B73	NA	-0.136444	2.93663	0.05	singlet	1	Protoderm
CB:Z:ACTGTCCTCGCGTTCT-pool21	1141	311	372	0	661	2.8202	0.272568	0.32603	0	1141	10x	tenx_B73	B73	NA	-0.271207	-1.51007	0.0711538	singlet	7	Ground_meristem
CB:Z:AACGGGAAGACCCATT-pool21	8250	1703	1810	0	4819	3.68296	0.206424	0.219394	0	8250	10x	tenx_B73	B73	NA	0.429948	3.04626	0.0557692	singlet	6	Vascular_parenchyma
CB:Z:GCTCGAGTCTTGTACT-pool21	2480	778	931	0	1435	3.15685	0.31371	0.375403	0	2480	10x	tenx_B73	B73	NA	2.12264	4.74643	0.0711538	singlet	3	Axillary_meristem
CB:Z:CTCAACCAGGTAAGTT-pool21	2299	943	1214	0	1256	3.09899	0.410178	0.528056	0	2299	10x	tenx_B73	B73	NA	-2.18325	-0.662681	0.119231	singlet	12	Epidermis
CB:Z:TGCGTAACATCATAGC-pool21	12591	4526	5650	0	7306	3.86368	0.359463	0.448733	0	12591	10x	tenx_B73	B73	NA	2.22491	5.75659	0.144231	singlet	3	Axillary_meristem
CB:Z:GATCGTAGTTCTTTGT-pool21	3293	1341	1897	0	1815	3.25888	0.407227	0.57607	0	3293	10x	tenx_B73	B73	NA	-2.0929	5.13278	0.0903846	singlet	9	Vascular_parenchyma_precursor
CB:Z:GACCAATTCGAAGCCC-pool21	1602	426	453	0	951	2.97818	0.265918	0.282772	0	1602	10x	tenx_B73	B73	NA	-0.771826	3.91622	0.146154	singlet	9	Vascular_parenchyma_precursor
CB:Z:CATGCCTAGCAATAAC-pool21	53155	13476	13601	0	29004	4.46246	0.253523	0.255874	0	53155	10x	tenx_B73	B73	NA	-0.683447	0.580222	0.171154	singlet	12	Epidermis
CB:Z:TGGGTGCCAGTTAAAG-pool21	5837	1394	1868	0	3088	3.48968	0.238821	0.320027	0	5837	10x	tenx_B73	B73	NA	1.01551	0.460711	0.142308	singlet	5	Ground_meristem
CB:Z:GCCCAGAGTCAGAAAT-pool21	2731	832	1012	0	1542	3.18808	0.30465	0.37056	0	2731	10x	tenx_B73	B73	NA	-0.620254	4.15276	0.0596154	singlet	9	Vascular_parenchyma_precursor
CB:Z:TTACGTTGTCGAGGTA-pool21	1578	485	566	0	937	2.97174	0.307351	0.358682	0	1578	10x	tenx_B73	B73	NA	2.61051	4.22959	0.0557692	singlet	3	Axillary_meristem
CB:Z:TTGTTCAGTACAAATG-pool21	8732	3731	5295	0	4595	3.66229	0.427279	0.60639	0	8732	10x	tenx_B73	B73	NA	-2.25795	-1.89656	0.113462	singlet	4	Ground_meristem
CB:Z:GAGTGAGTCCTTTGAT-pool21	3998	1186	1407	0	2385	3.37749	0.296648	0.351926	0	3998	10x	tenx_B73	B73	NA	2.00317	4.93374	0.0346154	singlet	3	Axillary_meristem
CB:Z:GGCATTAGTGATAAGT-pool21	10265	2824	3026	0	5865	3.76827	0.27511	0.294788	0	10265	10x	tenx_B73	B73	NA	3.60991	-0.555481	0.0769231	singlet	11	Mesophyll
CB:Z:CTCACCATCCCAATGA-pool21	7265	2235	2677	0	4271	3.63053	0.307639	0.368479	0	7265	10x	tenx_B73	B73	NA	-0.798606	-1.66785	0.138462	singlet	7	Ground_meristem
CB:Z:CTCACCATCTGTAGAC-pool21	5884	1946	2764	0	3269	3.51441	0.330727	0.469748	0	5884	10x	tenx_B73	B73	NA	-2.16053	3.33651	0.115385	singlet	11	Mesophyll
CB:Z:CCTTAATCAAACGACG-pool21	1254	385	445	0	742	2.8704	0.307018	0.354864	0	1254	10x	tenx_B73	B73	NA	-0.367439	4.45947	0.101923	singlet	9	Vascular_parenchyma_precursor
CB:Z:CAGCTGGAGTTGGAAT-pool21	13294	3497	4687	4	7067	3.84924	0.263051	0.352565	0.000300888	13294	10x	tenx_B73	B73	NA	3.88696	-1.83231	0.109615	singlet	13	Bundle_sheath
CB:Z:CTCTACGCACTTACAG-pool21	52401	17262	22676	6	26168	4.41777	0.329421	0.43274	0.000114502	52401	10x	tenx_B73	B73	NA	4.43883	-1.96589	0.153846	singlet	13	Bundle_sheath
CB:Z:ACGTGGCCAAGGGTAC-pool21	2182	658	759	2	1274	3.10517	0.301558	0.347846	0.00091659	2182	10x	tenx_B73	B73	NA	1.64088	4.59465	0.0923077	singlet	3	Axillary_meristem
CB:Z:AGATTCGTCGGGTCCA-pool21	4548	1524	1607	2	2673	3.427	0.335092	0.353342	0.000439754	4548	10x	tenx_B73	B73	NA	-0.85206	-0.634988	0.0403846	singlet	1	Protoderm
CB:Z:GCGATTACAGTGGTCC-pool21	3689	1453	1981	0	1990	3.29885	0.393874	0.537002	0	3689	10x	tenx_B73	B73	NA	-2.11812	5.14862	0.0615385	singlet	9	Vascular_parenchyma_precursor
CB:Z:TTCTAACTCGCGTTCT-pool21	1124	277	301	0	642	2.80754	0.246441	0.267794	0	1124	10x	tenx_B73	B73	NA	-1.43707	4.64346	0.128846	singlet	9	Vascular_parenchyma_precursor
CB:Z:CAGCTGGTCGAGGCTC-pool21	15053	4090	5239	0	7962	3.90102	0.271707	0.348037	0	15053	10x	tenx_B73	B73	NA	-1.70705	1.96587	0.194231	singlet	5	Ground_meristem
CB:Z:CTGCGTTGTCGATAGG-pool21	2067	821	1081	0	1120	3.04922	0.397194	0.52298	0	2067	10x	tenx_B73	B73	NA	2.52252	-2.4633	0.0461538	singlet	2	Bundle_sheath
CB:Z:GAAAGTAAGTTATGAG-pool21	3560	1595	2185	0	1906	3.28012	0.448034	0.613764	0	3560	10x	tenx_B73	B73	NA	-3.20307	-3.01315	0.194231	singlet	14	Procabium
CB:Z:AGTTTGGGTGAATACA-pool21	49797	13914	14177	2	26505	4.42333	0.279414	0.284696	4.01631e-05	49797	10x	tenx_B73	B73	NA	-0.438126	2.09088	0.0826923	singlet	1	Protoderm
CB:Z:ACGGATTGTCAGCAAG-pool21	30441	10996	16889	0	14761	4.16912	0.361223	0.554811	0	30441	10x	tenx_B73	B73	NA	2.8409	-0.0685394	0.176923	singlet	11	Mesophyll
CB:Z:CGGACTGGTGGCGCTT-pool21	33484	12548	17893	0	15884	4.20096	0.374746	0.534375	0	33484	10x	tenx_B73	B73	NA	3.25699	-0.124775	0.128846	singlet	11	Mesophyll
CB:Z:TATTGCTGTGGACGAT-pool21	6963	1579	1706	0	3820	3.58206	0.22677	0.245009	0	6963	10x	tenx_B73	B73	NA	0.033877	0.181175	0.113462	singlet	1	Protoderm
CB:Z:CTAACTTGTGCCCGAT-pool21	16413	4415	6108	2	8774	3.9432	0.268994	0.372144	0.000121855	16413	10x	tenx_B73	B73	NA	1.0024	-0.120555	0.0807692	singlet	5	Ground_meristem
CB:Z:GGTGCTGGTTCTGATG-pool21	1316	371	471	0	797	2.90146	0.281915	0.357903	0	1316	10x	tenx_B73	B73	NA	0.434994	-1.96836	0.0923077	singlet	4	Ground_meristem
CB:Z:GCGAGAAGTACCAAGG-pool21	2527	614	803	0	1403	3.14706	0.242976	0.317768	0	2527	10x	tenx_B73	B73	NA	1.32862	0.179336	0.163462	singlet	5	Ground_meristem
CB:Z:TTCATTGTCGCCTTAC-pool21	50518	18267	23721	2	23601	4.37293	0.361594	0.469555	3.95898e-05	50518	10x	tenx_B73	B73	NA	-2.22685	2.96854	0.132692	singlet	9	Vascular_parenchyma_precursor
CB:Z:CGATGATTCTCGTGAA-pool21	4510	1097	1361	0	2397	3.37967	0.243237	0.301774	0	4510	10x	tenx_B73	B73	NA	1.02626	0.4208	0.136538	singlet	5	Ground_meristem
CB:Z:CTGTTCGAGGGTGTTG-pool21	1742	469	463	0	988	2.99476	0.269231	0.265786	0	1742	10x	tenx_B73	B73	NA	-0.421678	4.09929	0.0557692	singlet	9	Vascular_parenchyma_precursor
CB:Z:TTAACGGGTGCACATT-pool21	18580	5566	6998	0	9702	3.98686	0.299569	0.376642	0	18580	10x	tenx_B73	B73	NA	0.787077	0.427533	0.15	singlet	5	Ground_meristem
CB:Z:ACAAGCTGTAAACGTA-pool21	3066	839	1061	0	1802	3.25575	0.273646	0.346053	0	3066	10x	tenx_B73	B73	NA	1.44863	4.47384	0.0788462	singlet	3	Axillary_meristem
CB:Z:ACCCAAAGTATGGATA-pool21	61111	17507	19477	6	32215	4.50806	0.286479	0.318715	9.8182e-05	61111	10x	tenx_B73	B73	NA	0.521261	1.28173	0.123077	singlet	1	Protoderm
CB:Z:TGTAGCATCGAACCGC-pool21	39333	13407	18068	4	19666	4.29372	0.340859	0.45936	0.000101696	39333	10x	tenx_B73	B73	NA	2.24767	-0.087188	0.148077	singlet	11	Mesophyll
CB:Z:CTCTAGCCACGCGCAT-pool21	2644	790	862	0	1505	3.17754	0.29879	0.326021	0	2644	10x	tenx_B73	B73	NA	1.25007	4.77744	0.0326923	singlet	3	Axillary_meristem
CB:Z:GAGCATTGTTGGCTTA-pool21	1071	231	288	0	591	2.77159	0.215686	0.268908	0	1071	10x	tenx_B73	B73	NA	-0.70887	3.10627	0.0884615	singlet	9	Vascular_parenchyma_precursor
CB:Z:CTCTCAGCAGATGGCA-pool21	36186	10816	13519	2	18649	4.27066	0.2989	0.373598	5.527e-05	36186	10x	tenx_B73	B73	NA	2.62353	-0.0118395	0.0980769	singlet	11	Mesophyll
CB:Z:CCCTCTCCAAAGGTCG-pool21	13662	3307	4298	4	7222	3.85866	0.242058	0.314595	0.000292783	13662	10x	tenx_B73	B73	NA	1.15191	-0.135227	0.107692	singlet	5	Ground_meristem
CB:Z:GGGTGTCGTCCCGAGT-pool21	1539	387	356	0	887	2.94792	0.251462	0.231319	0	1539	10x	tenx_B73	B73	NA	-0.891749	1.43088	0.0942308	singlet	12	Epidermis
CB:Z:CGCTAGGAGACGCCCT-pool21	8699	2908	3572	0	5026	3.70122	0.334291	0.410622	0	8699	10x	tenx_B73	B73	NA	2.53342	4.59652	0.0538462	singlet	3	Axillary_meristem
CB:Z:GCCTAGGTCATCGCCT-pool21	25050	5177	5727	0	13459	4.12901	0.206667	0.228623	0	25050	10x	tenx_B73	B73	NA	0.806641	0.471989	0.125	singlet	5	Ground_meristem
CB:Z:GAGGTCCTCGAGGTAG-pool21	1156	364	471	0	634	2.80209	0.314879	0.407439	0	1156	10x	tenx_B73	B73	NA	-2.07254	-1.02975	0.126923	singlet	12	Epidermis
CB:Z:GAAGTGGAGCGAATAT-pool21	2869	791	997	0	1578	3.19811	0.275706	0.347508	0	2869	10x	tenx_B73	B73	NA	2.14087	-0.587063	0.115385	singlet	11	Mesophyll
CB:Z:TTGTTCATCTATAGGC-pool21	1940	584	602	2	1171	3.06856	0.301031	0.310309	0.00103093	1940	10x	tenx_B73	B73	NA	1.22117	4.02112	0.0596154	singlet	3	Axillary_meristem
CB:Z:TTGCTTAGTAATGCAA-pool21	16853	5112	6080	0	8773	3.94315	0.303329	0.360767	0	16853	10x	tenx_B73	B73	NA	2.95399	-0.0893993	0.121154	singlet	11	Mesophyll
CB:Z:TCACAAGTCAGGGTTT-pool21	1167	391	492	0	675	2.8293	0.335047	0.421594	0	1167	10x	tenx_B73	B73	NA	1.6244	-2.96101	0.0865385	singlet	2	Bundle_sheath
CB:Z:CTTGCTGAGGGTTCTT-pool21	23001	8043	10423	0	11452	4.05888	0.34968	0.453154	0	23001	10x	tenx_B73	B73	NA	-1.94863	5.19818	0.15	singlet	9	Vascular_parenchyma_precursor
CB:Z:GTACTTTTCTCTTCCT-pool21	1655	515	628	0	929	2.96802	0.311178	0.379456	0	1655	10x	tenx_B73	B73	NA	2.683	-0.494854	0.0826923	singlet	11	Mesophyll
CB:Z:CCATACCCAAATGCTC-pool21	47255	13910	19479	4	23662	4.37405	0.29436	0.41221	8.46471e-05	47255	10x	tenx_B73	B73	NA	2.28091	0.140368	0.136538	singlet	11	Mesophyll
CB:Z:CTCTAGCGTTCTGATG-pool21	26799	8833	9812	0	13418	4.12769	0.329602	0.366133	0	26799	10x	tenx_B73	B73	NA	-1.86618	5.07804	0.169231	singlet	5	Ground_meristem
CB:Z:CTCTAGCGTTGGGAAC-pool21	14340	4906	5477	0	7418	3.87029	0.34212	0.381939	0	14340	10x	tenx_B73	B73	NA	-1.83181	5.09755	0.171154	singlet	9	Vascular_parenchyma_precursor
CB:Z:TTAGCGAGTGAGTAAT-pool21	1268	309	298	0	755	2.87795	0.243691	0.235016	0	1268	10x	tenx_B73	B73	NA	-0.417342	-6.30413	0.132692	singlet	13	Bundle_sheath
CB:Z:TGAGTCAGTTATCGAC-pool21	49622	14297	19724	2	25179	4.40104	0.288118	0.397485	4.03047e-05	49622	10x	tenx_B73	B73	NA	1.69433	0.12871	0.138462	singlet	11	Mesophyll
CB:Z:TAGCTTTGTGACAAGC-pool21	6363	1886	2199	0	3649	3.56217	0.296401	0.345592	0	6363	10x	tenx_B73	B73	NA	2.46093	4.53658	0.0615385	singlet	3	Axillary_meristem
CB:Z:CCTAAAGGTGTCCCAG-pool21	20194	4749	4619	2	11289	4.05266	0.235169	0.228731	9.90393e-05	20194	10x	tenx_B73	B73	NA	0.945961	0.510325	0.178846	singlet	5	Ground_meristem
CB:Z:AGCGATTGTGGACGAT-pool21	2366	781	1005	0	1258	3.09968	0.330093	0.424768	0	2366	10x	tenx_B73	B73	NA	2.75896	0.24945	0.0576923	singlet	9	Vascular_parenchyma_precursor
CB:Z:TGTTAGGCATTCACCC-pool21	16345	4197	4947	0	8923	3.95051	0.256776	0.302661	0	16345	10x	tenx_B73	B73	NA	0.82562	0.489713	0.163462	singlet	5	Ground_meristem
CB:Z:ATTTGTCGTAGATTAG-pool21	21257	7833	10312	2	12054	4.08113	0.36849	0.485111	9.40867e-05	21257	10x	tenx_B73	B73	NA	2.2296	5.77915	0.119231	singlet	3	Axillary_meristem
CB:Z:GATGATCCAATGTAAG-pool21	6010	1370	1954	2	3255	3.51255	0.227953	0.325125	0.000332779	6010	10x	tenx_B73	B73	NA	1.05303	0.364267	0.178846	singlet	5	Ground_meristem
CB:Z:TACTCGCGTCAACTGT-pool21	7159	2314	3333	0	3785	3.57807	0.32323	0.465568	0	7159	10x	tenx_B73	B73	NA	2.51068	-0.698047	0.0557692	singlet	11	Mesophyll
CB:Z:TTACCGCTCGCTGATA-pool21	22689	7308	10640	2	11291	4.05273	0.322094	0.46895	8.81484e-05	22689	10x	tenx_B73	B73	NA	1.87683	0.155486	0.159615	singlet	11	Mesophyll
CB:Z:ACAATCGGTGCCCTAG-pool21	79733	28591	43767	4	36308	4.56	0.358584	0.54892	5.01674e-05	79733	10x	tenx_B73	B73	NA	2.43747	0.162807	0.115385	singlet	11	Mesophyll
CB:Z:AGCTGTAAGGGAAATG-pool21	3182	782	778	0	1858	3.26905	0.245757	0.2445	0	3182	10x	tenx_B73	B73	NA	-1.28558	5.30256	0.125	singlet	9	Vascular_parenchyma_precursor
CB:Z:GCACCTTCAACGTACT-pool21	4661	1519	1816	2	2704	3.43201	0.325896	0.389616	0.000429092	4661	10x	tenx_B73	B73	NA	2.15058	4.62806	0.0461538	singlet	3	Axillary_meristem
CB:Z:ACTAGGTGTAGCTGTT-pool21	23004	8264	11687	0	11511	4.06111	0.359242	0.508042	0	23004	10x	tenx_B73	B73	NA	2.11485	0.133666	0.0596154	singlet	11	Mesophyll
CB:Z:AGACAAAAGGTCGTTT-pool21	2450	606	763	0	1344	3.1284	0.247347	0.311429	0	2450	10x	tenx_B73	B73	NA	1.07578	0.504484	0.161538	singlet	5	Ground_meristem
CB:Z:GTGCTGGAGTGAAACT-pool21	13922	4251	5804	0	7235	3.85944	0.305344	0.416894	0	13922	10x	tenx_B73	B73	NA	-1.95117	0.982059	0.132692	singlet	12	Epidermis
CB:Z:TTAACGGAGGCTAAAT-pool21	9775	2512	4210	4	5083	3.70612	0.256982	0.430691	0.000409207	9775	10x	tenx_B73	B73	NA	1.11512	0.475364	0.190385	singlet	5	Ground_meristem
CB:Z:ACAGACTCACACTAGT-pool21	1726	552	663	0	993	2.99695	0.319815	0.384125	0	1726	10x	tenx_B73	B73	NA	-2.35081	-4.12407	0.0423077	singlet	4	Ground_meristem
CB:Z:ACCGGGTGTGGATTTC-pool21	15895	4298	5513	0	8276	3.91782	0.270399	0.346839	0	15895	10x	tenx_B73	B73	NA	1.54271	0.116652	0.132692	singlet	11	Mesophyll
CB:Z:GACCAATTCGGTTCCT-pool21	18732	4938	6322	0	9868	3.99423	0.263613	0.337497	0	18732	10x	tenx_B73	B73	NA	1.01779	0.345687	0.134615	singlet	5	Ground_meristem
CB:Z:GCGATCGCAGTGCTCG-pool21	5041	1309	1571	2	2929	3.46672	0.259671	0.311645	0.000396747	5041	10x	tenx_B73	B73	NA	-1.20277	4.17424	0.0576923	singlet	9	Vascular_parenchyma_precursor
CB:Z:TTTGCGCAGCTACGTT-pool21	35459	11509	14261	2	17864	4.25198	0.324572	0.402183	5.64032e-05	35459	10x	tenx_B73	B73	NA	4.44997	-0.706744	0.111538	singlet	13	Bundle_sheath
CB:Z:AGTTACGAGTAATCAG-pool21	44038	12720	16582	6	22541	4.35297	0.288841	0.376538	0.000136246	44038	10x	tenx_B73	B73	NA	0.81663	0.0673632	0.171154	singlet	5	Ground_meristem
CB:Z:GCTTTCGCATTCCCGT-pool21	41160	10474	12668	2	21570	4.33385	0.25447	0.307775	4.85909e-05	41160	10x	tenx_B73	B73	NA	0.271977	1.28435	0.157692	singlet	1	Protoderm
CB:Z:GCTCGAGTCGGTCTCT-pool21	74861	24839	33057	0	35985	4.55612	0.331802	0.441578	0	74861	10x	tenx_B73	B73	NA	2.29974	-0.424622	0.178846	singlet	11	Mesophyll
CB:Z:ATGCATGCAAAGCTTC-pool21	72631	28283	42417	0	33607	4.52643	0.389407	0.584007	0	72631	10x	tenx_B73	B73	NA	3.36616	-0.132897	0.138462	singlet	11	Mesophyll
CB:Z:GGGTTATAGCGTAGCA-pool21	1816	473	468	0	1081	3.03383	0.260463	0.257709	0	1816	10x	tenx_B73	B73	NA	-0.589965	-0.288083	0.0307692	singlet	1	Protoderm
CB:Z:AGCCGCATCGATGTGT-pool21	8573	1962	2172	0	4791	3.68043	0.228858	0.253354	0	8573	10x	tenx_B73	B73	NA	0.766158	0.0831323	0.144231	singlet	5	Ground_meristem
CB:Z:TTGAGCAAGCGTGTTT-pool21	1544	361	381	0	890	2.94939	0.233808	0.246762	0	1544	10x	tenx_B73	B73	NA	-1.81885	5.76997	0.109615	singlet	9	Vascular_parenchyma_precursor
CB:Z:CGTTCCATCGATAGGG-pool21	7280	1766	1946	0	4164	3.61951	0.242582	0.267308	0	7280	10x	tenx_B73	B73	NA	0.687048	-0.254233	0.126923	singlet	5	Ground_meristem
CB:Z:CTAGGATAGTATCTGC-pool21	1719	742	1055	0	948	2.97681	0.431646	0.613729	0	1719	10x	tenx_B73	B73	NA	-1.20242	-1.7547	0.151923	singlet	4	Ground_meristem
CB:Z:CAGTGCGTCAATGCAC-pool21	3564	985	1059	2	2097	3.3216	0.276375	0.297138	0.000561167	3564	10x	tenx_B73	B73	NA	0.594874	2.46311	0.0346154	singlet	1	Protoderm
CB:Z:GCTTTCGAGCGCACAA-pool21	1014	365	523	0	599	2.77743	0.359961	0.515779	0	1014	10x	tenx_B73	B73	NA	-0.718866	4.81096	0.075	singlet	9	Vascular_parenchyma_precursor
CB:Z:GGAACCCAGGAACCGT-pool21	49380	16407	22280	2	24566	4.39033	0.33226	0.451195	4.05022e-05	49380	10x	tenx_B73	B73	NA	0.930232	0.137123	0.163462	singlet	5	Ground_meristem
CB:Z:ACAGGCCCAACTAGAA-pool21	13505	4887	6569	0	7724	3.88784	0.361866	0.486412	0	13505	10x	tenx_B73	B73	NA	2.23934	5.72152	0.146154	singlet	3	Axillary_meristem
CB:Z:TAGGTGTGTGTCTCGG-pool21	22516	5657	6475	2	12384	4.09286	0.251244	0.287573	8.88257e-05	22516	10x	tenx_B73	B73	NA	0.627972	0.482953	0.134615	singlet	5	Ground_meristem
CB:Z:GGCACGTAGATATGAC-pool21	18193	4045	4909	2	9777	3.99021	0.222338	0.269829	0.000109932	18193	10x	tenx_B73	B73	NA	1.72688	0.133638	0.159615	singlet	11	Mesophyll
CB:Z:TTACGGAGTACTTCAG-pool21	9524	2373	2800	0	5069	3.70492	0.24916	0.293994	0	9524	10x	tenx_B73	B73	NA	2.45802	-0.443724	0.0865385	singlet	11	Mesophyll
CB:Z:TTACGGAGTGGCATAG-pool21	5249	1428	1748	2	2764	3.44154	0.272052	0.333016	0.000381025	5249	10x	tenx_B73	B73	NA	2.70307	-0.584966	0.0596154	singlet	11	Mesophyll
CB:Z:ACTAGGTCATACTGCA-pool21	13856	3921	4702	0	7594	3.88047	0.282982	0.339348	0	13856	10x	tenx_B73	B73	NA	0.913267	-0.22474	0.173077	singlet	5	Ground_meristem
CB:Z:GCACCTTAGGATTGAT-pool21	13615	5167	7410	0	7136	3.85345	0.379508	0.544253	0	13615	10x	tenx_B73	B73	NA	4.42498	-0.747779	0.0923077	singlet	13	Bundle_sheath
CB:Z:AACGGGATCTCTATTG-pool21	12620	5157	6976	0	6612	3.82033	0.408637	0.552773	0	12620	10x	tenx_B73	B73	NA	-2.01858	5.1866	0.1	singlet	9	Vascular_parenchyma_precursor
CB:Z:TGAATCGAGAGAATTC-pool21	46337	12561	15226	0	23784	4.37628	0.271079	0.328593	0	46337	10x	tenx_B73	B73	NA	3.24855	1.8513	0.157692	singlet	13	Bundle_sheath
CB:Z:AAATGAGCAATGTGCT-pool21	31747	9722	13396	2	16007	4.20431	0.306234	0.421961	6.29981e-05	31747	10x	tenx_B73	B73	NA	2.65186	-0.0962942	0.165385	singlet	11	Mesophyll
CB:Z:TAGACTGCACTGGGCT-pool21	10109	2968	4109	0	5469	3.73791	0.2936	0.406469	0	10109	10x	tenx_B73	B73	NA	3.0453	-0.361835	0.0653846	singlet	11	Mesophyll
CB:Z:TTGCTATAGAAATGGG-pool21	60209	21261	31419	10	28322	4.45212	0.35312	0.521832	0.000166088	60209	10x	tenx_B73	B73	NA	1.09028	-0.503004	0.134615	singlet	5	Ground_meristem
CB:Z:GTAGTACGTTGCCTGG-pool21	13609	4806	6274	2	7816	3.89298	0.353149	0.461018	0.000146962	13609	10x	tenx_B73	B73	NA	2.24575	5.71679	0.0865385	singlet	3	Axillary_meristem
CB:Z:CCAATGATCGCGATGC-pool21	3818	1119	1339	0	2242	3.35064	0.293085	0.350707	0	3818	10x	tenx_B73	B73	NA	2.48743	4.53378	0.0711538	singlet	3	Axillary_meristem
CB:Z:CCCAGAGCATCAACTG-pool21	5571	1690	2090	0	3001	3.47727	0.303357	0.375157	0	5571	10x	tenx_B73	B73	NA	1.84583	0.187144	0.115385	singlet	11	Mesophyll
CB:Z:TTCGGTCAGCTACGCC-pool21	14356	4665	5963	2	7385	3.86835	0.324951	0.415366	0.000139315	14356	10x	tenx_B73	B73	NA	3.13211	2.04302	0.113462	singlet	6	Vascular_parenchyma
CB:Z:TGCATGACATCCTCGT-pool21	34351	9592	12513	0	17384	4.24015	0.279235	0.364269	0	34351	10x	tenx_B73	B73	NA	1.17764	0.188776	0.142308	singlet	5	Ground_meristem
CB:Z:CTGTATTAGGTAAGCC-pool21	31231	10192	14746	0	15749	4.19725	0.326342	0.472159	0	31231	10x	tenx_B73	B73	NA	0.9358	-0.134046	0.171154	singlet	5	Ground_meristem
CB:Z:ATGTCTTGTAACCATC-pool21	1045	258	286	0	600	2.77815	0.24689	0.273684	0	1045	10x	tenx_B73	B73	NA	2.75461	-0.456033	0.0596154	singlet	11	Mesophyll
CB:Z:TATGTGGAGGCAGATC-pool21	16334	3886	4927	2	8885	3.94866	0.237909	0.301641	0.000122444	16334	10x	tenx_B73	B73	NA	0.971742	0.225554	0.140385	singlet	5	Ground_meristem
CB:Z:GTCACAATCGCTTACC-pool21	38195	8278	9508	2	20363	4.30884	0.21673	0.248933	5.23629e-05	38195	10x	tenx_B73	B73	NA	0.778993	0.464891	0.173077	singlet	5	Ground_meristem
CB:Z:TCAGGTAAGGTGAACC-pool21	9917	2508	3183	0	5389	3.73151	0.252899	0.320964	0	9917	10x	tenx_B73	B73	NA	0.902232	-0.0417705	0.0615385	singlet	5	Ground_meristem
CB:Z:AACCGATGTCGCGCTA-pool21	1369	287	361	0	769	2.88593	0.209642	0.263696	0	1369	10x	tenx_B73	B73	NA	0.281773	-0.931651	0.0884615	singlet	1	Protoderm
CB:Z:AACCGATGTCTGAGCC-pool21	2238	485	603	0	1234	3.09132	0.216711	0.269437	0	2238	10x	tenx_B73	B73	NA	0.335168	-0.863357	0.0826923	singlet	5	Ground_meristem
CB:Z:AACAGTCGTTATAGAG-pool21	3902	1398	1864	0	2213	3.34498	0.358278	0.477704	0	3902	10x	tenx_B73	B73	NA	-1.60292	-1.17455	0.113462	singlet	4	Ground_meristem
CB:Z:TGCTTCGCACCACCAG-pool21	1060	333	452	0	582	2.76492	0.314151	0.426415	0	1060	10x	tenx_B73	B73	NA	-2.92454	-2.92509	0.107692	singlet	14	Procabium
CB:Z:ACATGCAGTTACGGAG-pool21	20017	5641	7445	0	10337	4.01439	0.28181	0.371934	0	20017	10x	tenx_B73	B73	NA	4.56894	-0.563827	0.0884615	singlet	13	Bundle_sheath
CB:Z:TTACGGACACGCTAAT-pool21	1202	412	507	0	664	2.82217	0.342762	0.421797	0	1202	10x	tenx_B73	B73	NA	-0.00897186	-0.854276	0.0923077	singlet	11	Mesophyll
CB:Z:CTAGCGGAGCATGTGG-pool21	38453	12398	13049	0	20081	4.30279	0.32242	0.339349	0	38453	10x	tenx_B73	B73	NA	2.23305	0.188978	0.0769231	singlet	11	Mesophyll
CB:Z:TTCATTGTCGGTTGTA-pool21	17113	6284	8319	0	9183	3.96298	0.367206	0.486122	0	17113	10x	tenx_B73	B73	NA	3.37194	1.43933	0.0788462	singlet	11	Mesophyll
CB:Z:GAAGTGGTCGCAAACT-pool21	5148	2000	2422	0	3005	3.47784	0.3885	0.470474	0	5148	10x	tenx_B73	B73	NA	2.52011	4.42545	0.0615385	singlet	3	Axillary_meristem
CB:Z:GGATGAGAGTATAGTG-pool21	17359	4101	5632	2	9096	3.95885	0.236246	0.324443	0.000115214	17359	10x	tenx_B73	B73	NA	0.999253	0.485426	0.165385	singlet	5	Ground_meristem
CB:Z:GGTTGCGAGTATAGTG-pool21	3758	1041	1285	0	2023	3.306	0.277009	0.341937	0	3758	10x	tenx_B73	B73	NA	3.02668	-0.160622	0.0615385	singlet	11	Mesophyll
CB:Z:GAGAACGAGCCTCGCA-pool21	2291	687	724	0	1322	3.12123	0.299869	0.316019	0	2291	10x	tenx_B73	B73	NA	-0.730828	4.55911	0.0230769	singlet	9	Vascular_parenchyma_precursor
CB:Z:GCATTCCGTAGGGTCA-pool21	28954	8860	12189	0	14409	4.15863	0.306003	0.420978	0	28954	10x	tenx_B73	B73	NA	1.87677	0.145305	0.159615	singlet	11	Mesophyll
CB:Z:GACCTTCAGGACCGAT-pool21	2447	504	697	2	1341	3.12743	0.205966	0.284839	0.000817327	2447	10x	tenx_B73	B73	NA	-1.45385	5.26166	0.105769	singlet	9	Vascular_parenchyma_precursor
CB:Z:GATGATCCAAGAAACT-pool21	1965	560	648	0	1049	3.02078	0.284987	0.329771	0	1965	10x	tenx_B73	B73	NA	1.06255	0.58163	0.128846	singlet	5	Ground_meristem
CB:Z:GCTGTTCCAAGAAACT-pool21	1325	384	460	0	717	2.85552	0.289811	0.34717	0	1325	10x	tenx_B73	B73	NA	1.21733	0.448375	0.142308	singlet	5	Ground_meristem
CB:Z:TGGAAGGCAAGAAACT-pool21	3836	967	1257	0	2078	3.31765	0.252086	0.327685	0	3836	10x	tenx_B73	B73	NA	1.07656	0.545532	0.107692	singlet	5	Ground_meristem
CB:Z:TTCATTGCAAGAAACT-pool21	1156	329	368	0	613	2.78746	0.284602	0.318339	0	1156	10x	tenx_B73	B73	NA	2.41044	1.6097	0.155769	singlet	5	Ground_meristem
CB:Z:TTGCGAAAGGTTGTGG-pool21	5437	1668	1839	0	3138	3.49665	0.306787	0.338238	0	5437	10x	tenx_B73	B73	NA	4.53565	-0.432858	0.105769	singlet	13	Bundle_sheath
CB:Z:ATTGTGGCACACACCG-pool21	2204	628	718	0	1284	3.10857	0.284936	0.325771	0	2204	10x	tenx_B73	B73	NA	0.792469	4.02647	0.0346154	singlet	3	Axillary_meristem
CB:Z:TTGCTATCAGCAACAG-pool21	1880	598	805	0	1104	3.04297	0.318085	0.428191	0	1880	10x	tenx_B73	B73	NA	2.34446	4.32233	0.0826923	singlet	3	Axillary_meristem
CB:Z:AGTGCCGGTTTGCGAT-pool21	7005	2141	2699	2	4046	3.60703	0.305639	0.385296	0.00028551	7005	10x	tenx_B73	B73	NA	1.97898	5.03225	0.0634615	singlet	3	Axillary_meristem
CB:Z:CCACGTTCAAAGCATA-pool21	22199	7474	9446	2	12661	4.10247	0.336682	0.425515	9.00941e-05	22199	10x	tenx_B73	B73	NA	2.2079	5.76586	0.157692	singlet	3	Axillary_meristem
CB:Z:TATGTGGTCGCTATTT-pool21	3520	1075	1244	0	2024	3.30621	0.305398	0.353409	0	3520	10x	tenx_B73	B73	NA	2.13718	4.88455	0.0711538	singlet	3	Axillary_meristem
CB:Z:TCAGGGCAGGAACCGT-pool21	5473	1851	2055	0	3170	3.50106	0.338206	0.37548	0	5473	10x	tenx_B73	B73	NA	2.45862	4.45893	0.0807692	singlet	3	Axillary_meristem
CB:Z:CTGCTCATCGTGGTAT-pool21	75228	27513	37978	2	34733	4.54074	0.365728	0.504839	2.65858e-05	75228	10x	tenx_B73	B73	NA	-1.32935	5.39687	0.119231	singlet	9	Vascular_parenchyma_precursor
CB:Z:GTTGGTACATCATCGA-pool21	1640	444	510	0	952	2.97864	0.270732	0.310976	0	1640	10x	tenx_B73	B73	NA	-1.31107	3.83607	0.0557692	singlet	9	Vascular_parenchyma_precursor
CB:Z:TTAGCGAGTAGCCATT-pool21	1605	414	396	0	896	2.95231	0.257944	0.246729	0	1605	10x	tenx_B73	B73	NA	-0.799131	0.407009	0.107692	singlet	1	Protoderm
CB:Z:CTCGCTAGTTGGCTAT-pool21	1967	519	514	0	1147	3.05956	0.263854	0.261312	0	1967	10x	tenx_B73	B73	NA	-0.758076	3.64415	0.0461538	singlet	9	Vascular_parenchyma_precursor
CB:Z:GAGATTCTCGTGTGCG-pool21	24956	6990	9847	0	12900	4.11059	0.280093	0.394574	0	24956	10x	tenx_B73	B73	NA	2.1522	0.0423814	0.113462	singlet	11	Mesophyll
CB:Z:TCCCACAAGTCGTACT-pool21	26313	7716	9770	0	13351	4.12551	0.293239	0.371299	0	26313	10x	tenx_B73	B73	NA	2.19335	0.138988	0.148077	singlet	11	Mesophyll
CB:Z:GCTGTTCCACGATTAC-pool21	1168	327	382	0	678	2.83123	0.279966	0.327055	0	1168	10x	tenx_B73	B73	NA	-0.542337	-0.0823651	0.109615	singlet	1	Protoderm
CB:Z:CTACTTAAGTGCCCTG-pool21	2328	516	505	0	1353	3.1313	0.221649	0.216924	0	2328	10x	tenx_B73	B73	NA	2.70355	-0.0397912	0.0634615	singlet	11	Mesophyll
CB:Z:GCACCTTTCCAATAGC-pool21	5318	1065	1456	0	2908	3.46359	0.200263	0.273787	0	5318	10x	tenx_B73	B73	NA	1.20361	0.606485	0.111538	singlet	5	Ground_meristem
CB:Z:TTAACGGTCTATAGGC-pool21	5238	1926	2600	0	3062	3.48601	0.367698	0.496373	0	5238	10x	tenx_B73	B73	NA	-1.00683	-1.76495	0.117308	singlet	7	Ground_meristem
CB:Z:TCGCCTATCAGTGTAC-pool21	11960	2918	3373	0	6517	3.81405	0.24398	0.282023	0	11960	10x	tenx_B73	B73	NA	2.82078	-0.0534722	0.121154	singlet	11	Mesophyll
CB:Z:TCACCTGGTCTCTGGG-pool21	36089	13569	17971	2	19861	4.298	0.375987	0.497963	5.54185e-05	36089	10x	tenx_B73	B73	NA	2.19778	5.77963	0.163462	singlet	3	Axillary_meristem
CB:Z:TACTCGCGTATTTGCG-pool21	2611	836	1282	0	1460	3.16435	0.320184	0.491	0	2611	10x	tenx_B73	B73	NA	2.56001	-0.725953	0.0576923	singlet	11	Mesophyll
CB:Z:TTGCGGGCAAGTCCTA-pool21	28906	11837	14848	2	13811	4.14023	0.4095	0.513665	6.91898e-05	28906	10x	tenx_B73	B73	NA	-1.88605	5.25852	0.155769	singlet	9	Vascular_parenchyma_precursor
CB:Z:TACGCCTCACTCCACT-pool21	10446	3566	4365	2	6039	3.78097	0.341375	0.417863	0.000191461	10446	10x	tenx_B73	B73	NA	2.45046	4.55801	0.0557692	singlet	3	Axillary_meristem
CB:Z:TATGTGGTCAAGGCAG-pool21	14747	4160	4156	0	8490	3.92891	0.282091	0.28182	0	14747	10x	tenx_B73	B73	NA	-1.23664	-5.70744	0.0942308	singlet	4	Ground_meristem
CB:Z:CGGTGCACAACGGGTA-pool21	14876	3747	5156	2	7944	3.90004	0.251882	0.346599	0.000134445	14876	10x	tenx_B73	B73	NA	0.988038	-0.134883	0.130769	singlet	5	Ground_meristem
CB:Z:CACCTTGGTGTTGTTG-pool21	3328	853	950	0	1905	3.27989	0.25631	0.285457	0	3328	10x	tenx_B73	B73	NA	3.03934	-0.322948	0.0923077	singlet	11	Mesophyll
CB:Z:ACTACCCAGGCAAGGG-pool21	1002	433	584	0	565	2.75205	0.432136	0.582834	0	1002	10x	tenx_B73	B73	NA	-2.12333	3.59768	0.101923	singlet	12	Epidermis
CB:Z:CCATACCTCCATCGAA-pool21	6569	3078	4453	0	3428	3.53504	0.468564	0.677881	0	6569	10x	tenx_B73	B73	NA	-0.889334	-3.27807	0.107692	singlet	2	Bundle_sheath
CB:Z:GCTCGAGGTAACGGCA-pool21	24641	10044	14571	0	11851	4.07375	0.407613	0.591332	0	24641	10x	tenx_B73	B73	NA	-2.04471	5.16828	0.117308	singlet	9	Vascular_parenchyma_precursor
CB:Z:TTTGTGTGTCAGAAAT-pool21	29282	8064	8811	0	15326	4.18543	0.275391	0.300902	0	29282	10x	tenx_B73	B73	NA	4.56809	-1.87958	0.182692	singlet	13	Bundle_sheath
CB:Z:CGTACAACATCTGCAA-pool21	5982	1548	2253	0	3122	3.49443	0.258776	0.37663	0	5982	10x	tenx_B73	B73	NA	1.20232	0.583542	0.157692	singlet	5	Ground_meristem
CB:Z:GCGCATGGTGGCATAG-pool21	2569	974	1300	0	1464	3.16554	0.379136	0.506033	0	2569	10x	tenx_B73	B73	NA	-2.14063	5.07423	0.0980769	singlet	9	Vascular_parenchyma_precursor
CB:Z:GTACTTTGTTTCGATG-pool21	58552	17632	24629	4	28716	4.45812	0.301134	0.420635	6.83153e-05	58552	10x	tenx_B73	B73	NA	0.859491	0.217015	0.157692	singlet	5	Ground_meristem
CB:Z:GAGACTTGTTCTACCC-pool21	11443	3364	4185	0	6606	3.81994	0.293979	0.365726	0	11443	10x	tenx_B73	B73	NA	3.03764	-0.313551	0.0903846	singlet	11	Mesophyll
CB:Z:GTAGGAGAGTTGAATG-pool21	36828	12603	14452	0	18499	4.26715	0.342212	0.392419	0	36828	10x	tenx_B73	B73	NA	-3.76257	2.83742	0.132692	singlet	14	Procabium
CB:Z:CATGCCTGTGGTCGAA-pool21	5828	1932	2396	0	3383	3.5293	0.331503	0.411119	0	5828	10x	tenx_B73	B73	NA	1.90404	4.90392	0.0673077	singlet	3	Axillary_meristem
CB:Z:AGCCTTCGTTTGTACG-pool21	1044	221	213	0	584	2.76641	0.211686	0.204023	0	1044	10x	tenx_B73	B73	NA	4.12298	-1.6278	0.0846154	singlet	13	Bundle_sheath
CB:Z:TTGTTCATCTCTGACC-pool21	16719	5949	8576	0	8544	3.93166	0.355823	0.512949	0	16719	10x	tenx_B73	B73	NA	5.06973	-1.81697	0.123077	singlet	13	Bundle_sheath
CB:Z:GTAGTACAGAGCTACG-pool21	1314	316	322	0	763	2.88252	0.240487	0.245053	0	1314	10x	tenx_B73	B73	NA	0.859024	-0.114896	0.173077	singlet	5	Ground_meristem
CB:Z:CGTTCCAGTAACATAG-pool21	11102	3492	4312	0	6463	3.81043	0.314538	0.388398	0	11102	10x	tenx_B73	B73	NA	2.22636	5.76184	0.126923	singlet	3	Axillary_meristem
CB:Z:GCAGCCATCCCGCAAG-pool21	1762	472	655	0	946	2.97589	0.267877	0.371737	0	1762	10x	tenx_B73	B73	NA	2.77787	-0.327642	0.075	singlet	11	Mesophyll
CB:Z:AGGACGAAGATTACGA-pool21	43499	14935	19859	0	21455	4.33153	0.343341	0.456539	0	43499	10x	tenx_B73	B73	NA	-1.87319	5.2308	0.15	singlet	9	Vascular_parenchyma_precursor
CB:Z:TGGGTTAAGCATTCCA-pool21	6158	1809	2063	0	3550	3.55023	0.293764	0.335011	0	6158	10x	tenx_B73	B73	NA	1.45726	4.39367	0.0423077	singlet	3	Axillary_meristem
CB:Z:GCATTGAGTGAATGTA-pool21	4089	1316	1756	0	2403	3.38075	0.321839	0.429445	0	4089	10x	tenx_B73	B73	NA	-1.53933	-2.38512	0.109615	singlet	4	Ground_meristem
CB:Z:GACCGACGTAGGTGAC-pool21	19968	6803	8558	0	10402	4.01712	0.340695	0.428586	0	19968	10x	tenx_B73	B73	NA	-1.67813	5.1785	0.0673077	singlet	9	Vascular_parenchyma_precursor
CB:Z:CTTAATCAGAGGAACA-pool21	9866	2595	2946	0	5782	3.76208	0.263025	0.298601	0	9866	10x	tenx_B73	B73	NA	1.98334	4.87306	0.0692308	singlet	3	Axillary_meristem
CB:Z:ATCCAGACATTACCTT-pool21	36208	11633	14523	2	17996	4.25518	0.321283	0.401099	5.52364e-05	36208	10x	tenx_B73	B73	NA	-3.81672	3.36461	0.0961538	singlet	10	Xylem
CB:Z:CCTTAATGTTTCTCTA-pool21	5408	1091	1530	0	2965	3.47202	0.201738	0.282914	0	5408	10x	tenx_B73	B73	NA	1.13272	0.484326	0.188462	singlet	5	Ground_meristem
CB:Z:GCTCCTACACCGTCTT-pool21	35532	9204	10732	2	17628	4.2462	0.259034	0.302038	5.62873e-05	35532	10x	tenx_B73	B73	NA	-0.408825	1.1419	0.148077	singlet	1	Protoderm
CB:Z:CACGTTCCATAGATAG-pool21	10395	3875	5332	0	5877	3.76916	0.372775	0.512939	0	10395	10x	tenx_B73	B73	NA	2.22152	5.76189	0.107692	singlet	3	Axillary_meristem
CB:Z:CTCGCTAGTTTCTCTA-pool21	1842	389	457	0	1084	3.03503	0.211183	0.2481	0	1842	10x	tenx_B73	B73	NA	-0.74755	4.34367	0.0288462	singlet	9	Vascular_parenchyma_precursor
CB:Z:GTAGGAGAGATGGGAA-pool21	14641	4938	6127	4	8368	3.92262	0.337272	0.418482	0.000273205	14641	10x	tenx_B73	B73	NA	2.21741	5.77829	0.1	singlet	3	Axillary_meristem
CB:Z:TGTAGCACAACTGCGC-pool21	2438	592	627	0	1442	3.15897	0.242822	0.257178	0	2438	10x	tenx_B73	B73	NA	2.24552	-0.248323	0.128846	singlet	11	Mesophyll
CB:Z:ACAGGCCGTAGGGTCA-pool21	36367	13110	16101	0	18834	4.27494	0.360492	0.442737	0	36367	10x	tenx_B73	B73	NA	-1.59893	5.63458	0.0961538	singlet	9	Vascular_parenchyma_precursor
CB:Z:TGTGGCGAGGTTCGAG-pool21	1376	438	578	0	811	2.90902	0.318314	0.420058	0	1376	10x	tenx_B73	B73	NA	1.42542	-2.95634	0.075	singlet	2	Bundle_sheath
CB:Z:CACTAAGAGGATCCTT-pool21	24697	7165	8853	0	12434	4.09461	0.290116	0.358465	0	24697	10x	tenx_B73	B73	NA	-1.63921	5.48453	0.0711538	singlet	9	Vascular_parenchyma_precursor
CB:Z:GTTACTTGTTTCGTTT-pool21	1390	462	582	0	774	2.88874	0.332374	0.418705	0	1390	10x	tenx_B73	B73	NA	2.45967	-2.42456	0.0730769	singlet	2	Bundle_sheath
CB:Z:TTACGGAAGATGGGTC-pool21	9088	2313	2115	0	5791	3.76275	0.254511	0.232724	0	9088	10x	tenx_B73	B73	NA	4.61856	-1.88184	0.0807692	singlet	13	Bundle_sheath
CB:Z:TCTCAGCAGTACCCAT-pool21	5568	1132	1165	0	3083	3.48897	0.203305	0.209231	0	5568	10x	tenx_B73	B73	NA	-0.766676	-6.20546	0.117308	singlet	8	Phloem
CB:Z:AGACAAACATGGCCTG-pool21	8408	2235	2462	0	4510	3.65418	0.265818	0.292816	0	8408	10x	tenx_B73	B73	NA	-0.3886	0.456916	0.105769	singlet	1	Protoderm
CB:Z:GGTTGCGTCGCTGATA-pool21	12817	3262	3646	0	7326	3.86487	0.254506	0.284466	0	12817	10x	tenx_B73	B73	NA	3.30895	-1.8444	0.113462	singlet	2	Bundle_sheath
CB:Z:TTCTGTAAGTTTACGC-pool21	3868	1377	1736	0	2245	3.35122	0.355998	0.448811	0	3868	10x	tenx_B73	B73	NA	2.14611	4.88421	0.0942308	singlet	3	Axillary_meristem
CB:Z:AACTTGGAGTGAATAC-pool21	10472	2571	3284	0	5569	3.74578	0.245512	0.313598	0	10472	10x	tenx_B73	B73	NA	1.06228	0.45059	0.192308	singlet	5	Ground_meristem
CB:Z:CTAGGGCCACTCCTCA-pool21	4075	1158	1494	0	2176	3.33766	0.284172	0.366626	0	4075	10x	tenx_B73	B73	NA	1.44195	-0.942545	0.0942308	singlet	2	Bundle_sheath
CB:Z:GGGACCTGTCATAGCT-pool21	3546	941	942	2	2057	3.31323	0.265369	0.265651	0.000564016	3546	10x	tenx_B73	B73	NA	-0.760603	3.16693	0.0961538	singlet	6	Vascular_parenchyma
CB:Z:TTGCAGAGTGTCTCGG-pool21	6991	2691	3641	0	3756	3.57473	0.384923	0.520812	0	6991	10x	tenx_B73	B73	NA	4.07448	-1.45635	0.0788462	singlet	13	Bundle_sheath
CB:Z:GTCACAAGTAGCGGTA-pool21	27254	7863	9178	0	14290	4.15503	0.288508	0.336758	0	27254	10x	tenx_B73	B73	NA	-1.69156	1.99928	0.151923	singlet	5	Ground_meristem
CB:Z:GTCACTCCATGGTTTG-pool21	1562	626	905	0	862	2.93551	0.400768	0.579385	0	1562	10x	tenx_B73	B73	NA	-2.27329	2.84544	0.138462	singlet	12	Epidermis
CB:Z:TAGCCCTGTGGAGTGT-pool21	5820	2530	3541	0	3207	3.5061	0.434708	0.608419	0	5820	10x	tenx_B73	B73	NA	-2.58197	0.00279465	0.0942308	singlet	12	Epidermis
CB:Z:TTCTGTAAGTCCGGAA-pool21	9215	3403	4417	2	5284	3.72296	0.369289	0.479327	0.000217037	9215	10x	tenx_B73	B73	NA	2.22067	5.69619	0.130769	singlet	3	Axillary_meristem
CB:Z:TTGCTATTCTTCGTTA-pool21	16127	4828	6522	0	8449	3.92681	0.299374	0.404415	0	16127	10x	tenx_B73	B73	NA	1.62501	0.079655	0.15	singlet	11	Mesophyll
CB:Z:CGTGGCATCGCCCTTA-pool21	34997	12009	14846	2	17736	4.24886	0.343144	0.424208	5.71478e-05	34997	10x	tenx_B73	B73	NA	3.00693	-2.07303	0.101923	singlet	2	Bundle_sheath
CB:Z:GGGTGTCTCTCGCGTT-pool21	1001	218	230	0	565	2.75205	0.217782	0.22977	0	1001	10x	tenx_B73	B73	NA	-1.91706	2.87866	0.121154	singlet	12	Epidermis
CB:Z:CGCACAGCACACATTG-pool21	1012	219	256	0	564	2.75128	0.216403	0.252964	0	1012	10x	tenx_B73	B73	NA	1.17448	0.622828	0.182692	singlet	5	Ground_meristem
CB:Z:CCGTGAGAGAGGTGGG-pool21	17138	6489	8057	0	9508	3.97809	0.378632	0.470125	0	17138	10x	tenx_B73	B73	NA	-1.26258	4.51458	0.0903846	singlet	9	Vascular_parenchyma_precursor
CB:Z:GATCGTAAGGGTATCG-pool21	47854	12795	14730	0	25330	4.40364	0.267376	0.307811	0	47854	10x	tenx_B73	B73	NA	0.836054	0.856488	0.159615	singlet	5	Ground_meristem
CB:Z:CCGCATTCATACCCGG-pool21	5877	2080	2536	2	3231	3.50934	0.353922	0.431513	0.00034031	5877	10x	tenx_B73	B73	NA	3.30556	-0.359387	0.0692308	singlet	11	Mesophyll
CB:Z:ACCAAACTCGATCTTT-pool21	34095	9653	11568	0	18023	4.25583	0.283121	0.339287	0	34095	10x	tenx_B73	B73	NA	-1.74936	1.51671	0.163462	singlet	12	Epidermis
CB:Z:ACCAAACCAAATGTCC-pool21	3218	841	960	0	1715	3.23426	0.261342	0.298322	0	3218	10x	tenx_B73	B73	NA	-2.09541	2.62035	0.176923	singlet	12	Epidermis
CB:Z:CATGCCTCACAACGGA-pool21	2062	811	1241	0	1138	3.05614	0.393307	0.601843	0	2062	10x	tenx_B73	B73	NA	-1.70749	5.59041	0.115385	singlet	9	Vascular_parenchyma_precursor
CB:Z:TAGCATGAGAGACTCG-pool21	6857	1560	1856	0	3765	3.57576	0.227505	0.270672	0	6857	10x	tenx_B73	B73	NA	2.68355	-0.103741	0.125	singlet	11	Mesophyll
CB:Z:GAGCGCTTCTTTGCAT-pool21	29537	6827	8662	2	15601	4.19315	0.231134	0.293259	6.77117e-05	29537	10x	tenx_B73	B73	NA	2.46493	-0.0362425	0.142308	singlet	11	Mesophyll
CB:Z:CACTGAACAACGTCGC-pool21	2932	1234	1872	0	1589	3.20112	0.420873	0.638472	0	2932	10x	tenx_B73	B73	NA	-1.6594	-1.50035	0.146154	singlet	4	Ground_meristem
CB:Z:TTGCAGAAGATAGGTT-pool21	9136	2815	3425	0	4968	3.69618	0.308122	0.374891	0	9136	10x	tenx_B73	B73	NA	0.738333	0.502367	0.153846	singlet	5	Ground_meristem
CB:Z:TTTACGTGTCTGGGCT-pool21	9881	2912	3750	2	5318	3.72575	0.294707	0.379516	0.000202409	9881	10x	tenx_B73	B73	NA	0.821601	0.48172	0.140385	singlet	5	Ground_meristem
CB:Z:TCTAGTTTCTCGACCT-pool21	5244	2075	2537	0	3051	3.48444	0.39569	0.483791	0	5244	10x	tenx_B73	B73	NA	-1.59885	5.7089	0.105769	singlet	9	Vascular_parenchyma_precursor
CB:Z:GAACTTGGTTGTATCG-pool21	30716	11102	15087	4	17091	4.23277	0.36144	0.491177	0.000130225	30716	10x	tenx_B73	B73	NA	2.20352	5.78721	0.101923	singlet	3	Axillary_meristem
CB:Z:GAGCGCTAGAGGAAGT-pool21	45718	17392	23769	4	24460	4.38846	0.380419	0.519905	8.74929e-05	45718	10x	tenx_B73	B73	NA	2.13624	5.78198	0.0865385	singlet	3	Axillary_meristem
CB:Z:AAAGGGCAGGTAAGTT-pool21	5850	1873	2065	0	3367	3.52724	0.320171	0.352991	0	5850	10x	tenx_B73	B73	NA	2.00197	5.0206	0.0538462	singlet	3	Axillary_meristem
CB:Z:TGCATGAAGAACTAAC-pool21	4106	1569	1947	0	2406	3.3813	0.382124	0.474184	0	4106	10x	tenx_B73	B73	NA	1.90188	5.53526	0.130769	singlet	3	Axillary_meristem
CB:Z:CACGTTCGTGGTGGTA-pool21	10710	4087	5291	0	5312	3.72526	0.381606	0.494024	0	10710	10x	tenx_B73	B73	NA	-1.95297	4.94756	0.0980769	singlet	9	Vascular_parenchyma_precursor
CB:Z:TTGTTGTAGTCCAGAG-pool21	20914	4460	5458	2	11418	4.05759	0.213254	0.260974	9.56297e-05	20914	10x	tenx_B73	B73	NA	0.982172	0.344918	0.169231	singlet	5	Ground_meristem
CB:Z:AAGGAGCTCGACTGGC-pool21	17383	6082	8096	2	8721	3.94057	0.349882	0.465742	0.000115055	17383	10x	tenx_B73	B73	NA	2.27905	-0.126459	0.103846	singlet	11	Mesophyll
CB:Z:ACATGGTTCCAGGGAA-pool21	18502	6145	8764	4	9470	3.97635	0.332126	0.473679	0.000216193	18502	10x	tenx_B73	B73	NA	1.06681	-0.0747659	0.165385	singlet	5	Ground_meristem
CB:Z:TGGTCAAAGCGAATAT-pool21	1450	298	293	0	866	2.93752	0.205517	0.202069	0	1450	10x	tenx_B73	B73	NA	-0.297488	2.86295	0.0961538	singlet	1	Protoderm
CB:Z:TAGGTCAGTTGTGACT-pool21	1718	632	899	0	930	2.96848	0.36787	0.523283	0	1718	10x	tenx_B73	B73	NA	3.02021	-0.623642	0.0711538	singlet	11	Mesophyll
CB:Z:GACTAACAGCCGCTGT-pool21	18175	4161	5562	0	9599	3.98223	0.228941	0.306025	0	18175	10x	tenx_B73	B73	NA	1.86937	0.0422603	0.144231	singlet	11	Mesophyll
CB:Z:ACGGATTGTCAGCTTA-pool21	2412	784	1147	0	1330	3.12385	0.325041	0.475539	0	2412	10x	tenx_B73	B73	NA	3.09173	-0.358379	0.0865385	singlet	11	Mesophyll
CB:Z:GAGCGCTTCGTGGGTC-pool21	2766	853	1013	0	1560	3.19312	0.308388	0.366233	0	2766	10x	tenx_B73	B73	NA	2.93194	-0.295109	0.117308	singlet	11	Mesophyll
CB:Z:TCAAGGTAGAAATCTG-pool21	16672	6269	8290	2	9522	3.97873	0.37602	0.497241	0.000119962	16672	10x	tenx_B73	B73	NA	2.30131	5.64217	0.142308	singlet	3	Axillary_meristem
CB:Z:TGTACGATCTTGTCGC-pool21	3039	910	1060	0	1767	3.24724	0.299441	0.348799	0	3039	10x	tenx_B73	B73	NA	4.84837	-1.4205	0.075	singlet	13	Bundle_sheath
CB:Z:GCCTAGGAGTTCAACC-pool21	2718	820	1054	0	1601	3.20439	0.301692	0.387785	0	2718	10x	tenx_B73	B73	NA	1.7365	4.75006	0.0365385	singlet	3	Axillary_meristem
CB:Z:TTAGGTGAGTGATCTC-pool21	20851	7095	10409	0	10299	4.0128	0.340271	0.499209	0	20851	10x	tenx_B73	B73	NA	3.12665	-0.257744	0.0923077	singlet	11	Mesophyll
CB:Z:AACAAAGCACATATCG-pool21	8602	2013	2220	2	4531	3.65619	0.234015	0.25808	0.000232504	8602	10x	tenx_B73	B73	NA	2.37241	0.0148436	0.0711538	singlet	11	Mesophyll
CB:Z:ACTTCCGGTCTAAGAA-pool21	2189	553	702	0	1290	3.11059	0.252627	0.320694	0	2189	10x	tenx_B73	B73	NA	-2.27361	-4.75597	0.0461538	singlet	14	Procabium
CB:Z:TACGCAAGTGGGTAGT-pool21	3985	1449	1973	0	2162	3.33486	0.363614	0.495107	0	3985	10x	tenx_B73	B73	NA	-2.04915	5.16376	0.109615	singlet	9	Vascular_parenchyma_precursor
CB:Z:TAGGTGTTCCAGGTAT-pool21	2643	815	931	0	1505	3.17754	0.308362	0.352251	0	2643	10x	tenx_B73	B73	NA	1.88077	-1.18413	0.0653846	singlet	11	Mesophyll
CB:Z:GCCAGACAGTGATCTC-pool21	76502	26864	37656	8	36051	4.55692	0.351154	0.492222	0.000104572	76502	10x	tenx_B73	B73	NA	2.42622	0.13879	0.153846	singlet	11	Mesophyll
CB:Z:TACCTATGTGGAAAGA-pool21	4468	1236	1342	0	2574	3.41061	0.276634	0.300358	0	4468	10x	tenx_B73	B73	NA	-0.691256	4.71051	0.134615	singlet	9	Vascular_parenchyma_precursor
CB:Z:CAAGGCCTCCAGGCCA-pool21	30782	7412	8768	0	16332	4.21304	0.24079	0.284842	0	30782	10x	tenx_B73	B73	NA	1.10166	0.169774	0.140385	singlet	5	Ground_meristem
CB:Z:ATTCGTTAGATGCGAC-pool21	14414	5434	7586	0	7232	3.85926	0.376995	0.526294	0	14414	10x	tenx_B73	B73	NA	-0.329964	-5.36489	0.142308	singlet	6	Vascular_parenchyma
CB:Z:AGCCTGGCAGGTGGTA-pool21	4438	1549	1874	0	2548	3.4062	0.349031	0.422262	0	4438	10x	tenx_B73	B73	NA	2.18674	4.96978	0.0365385	singlet	3	Axillary_meristem
CB:Z:TAAGCCAGTTGTGAGG-pool21	25753	6948	6888	0	13860	4.14176	0.269794	0.267464	0	25753	10x	tenx_B73	B73	NA	-0.437009	3.03247	0.115385	singlet	5	Ground_meristem
CB:Z:GCTGTTCTCATCGCAA-pool21	5930	1815	2227	2	3440	3.53656	0.306071	0.375548	0.000337268	5930	10x	tenx_B73	B73	NA	1.78406	4.89652	0.0826923	singlet	3	Axillary_meristem
CB:Z:TAGGTGTTCGCTGATA-pool21	1754	586	676	0	1028	3.01199	0.334094	0.385405	0	1754	10x	tenx_B73	B73	NA	2.21081	5.33362	0.0923077	singlet	3	Axillary_meristem
CB:Z:AGCTATGAGTTCAGGG-pool21	34113	8765	11241	2	18173	4.25943	0.25694	0.329522	5.86287e-05	34113	10x	tenx_B73	B73	NA	4.629	-0.613127	0.1	singlet	13	Bundle_sheath
CB:Z:GGTCATACAAGTTCGT-pool21	1287	267	322	0	747	2.87332	0.207459	0.250194	0	1287	10x	tenx_B73	B73	NA	3.73162	-1.72958	0.109615	singlet	2	Bundle_sheath
CB:Z:AGTCCGGCATCCATAG-pool21	8201	1830	2374	0	4586	3.66143	0.223144	0.289477	0	8201	10x	tenx_B73	B73	NA	1.63554	-1.29097	0.0865385	singlet	7	Ground_meristem
CB:Z:AACTGGTAGTATACCC-pool21	1886	572	645	0	1127	3.05192	0.303287	0.341994	0	1886	10x	tenx_B73	B73	NA	2.7067	4.40105	0.0461538	singlet	3	Axillary_meristem
CB:Z:GCCTACTTCACTAGGT-pool21	3992	1285	1712	0	2107	3.32366	0.321894	0.428858	0	3992	10x	tenx_B73	B73	NA	2.87357	-0.414035	0.0615385	singlet	11	Mesophyll
CB:Z:GAAGAGCTCGCCAGAC-pool21	2600	713	792	0	1548	3.18977	0.274231	0.304615	0	2600	10x	tenx_B73	B73	NA	1.81126	5.10402	0.0557692	singlet	3	Axillary_meristem
CB:Z:TCTCTGGTCGGATAAA-pool21	2973	753	694	0	1764	3.2465	0.25328	0.233434	0	2973	10x	tenx_B73	B73	NA	-1.7966	-5.84356	0.025	singlet	1	Protoderm
CB:Z:TACTAGGAGGGAGTTC-pool21	12469	2720	3410	0	6621	3.82092	0.218141	0.273478	0	12469	10x	tenx_B73	B73	NA	1.80986	0.195629	0.132692	singlet	11	Mesophyll
CB:Z:CTCCCAATCCGGAAAG-pool21	3717	1282	1624	2	2168	3.33606	0.344902	0.436911	0.000538068	3717	10x	tenx_B73	B73	NA	-2.04678	-4.88681	0.0365385	singlet	14	Procabium
CB:Z:AAACGAAGTAACGGAC-pool21	1538	477	611	0	903	2.95569	0.310143	0.397269	0	1538	10x	tenx_B73	B73	NA	2.61121	4.56089	0.0673077	singlet	3	Axillary_meristem
CB:Z:ACCCAAAAGTACAGTA-pool21	13945	5867	8724	0	7285	3.86243	0.420724	0.625601	0	13945	10x	tenx_B73	B73	NA	-1.61563	-1.37688	0.113462	singlet	4	Ground_meristem
CB:Z:TGCTCACAGCTATCGT-pool21	10961	3157	4677	4	5821	3.765	0.288021	0.426695	0.00036493	10961	10x	tenx_B73	B73	NA	0.96164	-0.208022	0.138462	singlet	5	Ground_meristem
CB:Z:GCTGAGCCAAAGAGAG-pool21	1732	463	497	0	991	2.99607	0.267321	0.286952	0	1732	10x	tenx_B73	B73	NA	-0.373343	3.12763	0.0461538	singlet	9	Vascular_parenchyma_precursor
CB:Z:GCAAAGGCAGCGTGAA-pool21	3502	1101	1360	0	2016	3.30449	0.314392	0.38835	0	3502	10x	tenx_B73	B73	NA	1.88099	4.97842	0.0596154	singlet	3	Axillary_meristem
CB:Z:CGCTAGGAGAGGTGGG-pool21	3867	969	1265	0	2133	3.32899	0.250582	0.327127	0	3867	10x	tenx_B73	B73	NA	2.87511	-0.527781	0.0769231	singlet	11	Mesophyll
CB:Z:TTGCACCCAAAGGTCG-pool21	8563	2982	3635	0	4945	3.69417	0.348242	0.424501	0	8563	10x	tenx_B73	B73	NA	-1.57765	-0.941758	0.0461538	singlet	12	Epidermis
CB:Z:TCTATTGAGGTCACTT-pool21	25374	8638	10860	0	12871	4.10961	0.340427	0.427997	0	25374	10x	tenx_B73	B73	NA	-2.2251	2.89075	0.146154	singlet	12	Epidermis
CB:Z:GCTCAGGTCCTGTGGG-pool21	1219	274	276	0	703	2.84696	0.224774	0.226415	0	1219	10x	tenx_B73	B73	NA	0.198679	-1.80878	0.0557692	singlet	7	Ground_meristem
CB:Z:GCTCAGGTCGATAGGG-pool21	35499	9668	10966	0	18469	4.26644	0.272346	0.30891	0	35499	10x	tenx_B73	B73	NA	0.328194	-1.33555	0.0730769	singlet	7	Ground_meristem
CB:Z:TATCGAGAGGAGACTC-pool21	7088	2907	3582	2	4069	3.60949	0.41013	0.505361	0.000282167	7088	10x	tenx_B73	B73	NA	-0.675831	4.77638	0.125	singlet	9	Vascular_parenchyma_precursor
CB:Z:GCTGTTCCAGGCAGAT-pool21	2875	751	833	0	1689	3.22763	0.261217	0.289739	0	2875	10x	tenx_B73	B73	NA	3.18075	-0.158944	0.113462	singlet	11	Mesophyll
CB:Z:TCTCTGGCAATGCACT-pool21	2744	667	678	0	1634	3.21325	0.243076	0.247085	0	2744	10x	tenx_B73	B73	NA	-2.25733	-4.38867	0.0884615	singlet	1	Protoderm
CB:Z:CGCAATAAGTCCGTGC-pool21	1437	321	304	0	860	2.9345	0.223382	0.211552	0	1437	10x	tenx_B73	B73	NA	-0.579786	0.482952	0.0961538	singlet	4	Ground_meristem
CB:Z:TAACAGCGTGGGTAGT-pool21	2339	672	851	0	1331	3.12418	0.287302	0.363831	0	2339	10x	tenx_B73	B73	NA	1.89244	5.00692	0.103846	singlet	3	Axillary_meristem
CB:Z:TCACCTGCATGATCGT-pool21	33246	8855	11450	2	17242	4.23659	0.266348	0.344402	6.01576e-05	33246	10x	tenx_B73	B73	NA	1.02548	0.214608	0.178846	singlet	5	Ground_meristem
CB:Z:AGCCGCACAATTGGCT-pool21	2312	624	682	0	1336	3.12581	0.269896	0.294983	0	2312	10x	tenx_B73	B73	NA	2.61968	-0.152023	0.155769	singlet	11	Mesophyll
CB:Z:TAAGTGCTCTTGTGCC-pool21	10203	2899	3527	0	5752	3.75982	0.284132	0.345683	0	10203	10x	tenx_B73	B73	NA	4.08528	-0.865796	0.0557692	singlet	11	Mesophyll
CB:Z:CTTCCAGTCTTCCGTG-pool21	37504	12800	16402	2	19272	4.28493	0.341297	0.43734	5.33276e-05	37504	10x	tenx_B73	B73	NA	2.49191	-0.289067	0.130769	singlet	11	Mesophyll
CB:Z:GAACCTAAGATGCGAC-pool21	6092	2314	3119	0	3627	3.55955	0.379842	0.511983	0	6092	10x	tenx_B73	B73	NA	-1.02507	-2.00676	0.0942308	singlet	7	Ground_meristem
CB:Z:TCTCAGCGTAACAATG-pool21	2262	622	669	0	1313	3.11826	0.274978	0.295756	0	2262	10x	tenx_B73	B73	NA	2.58136	-0.525319	0.0730769	singlet	11	Mesophyll
CB:Z:TACGCAAGTCAGAGTG-pool21	16517	5108	6333	2	8798	3.94438	0.309257	0.383423	0.000121087	16517	10x	tenx_B73	B73	NA	-1.64549	5.10192	0.117308	singlet	9	Vascular_parenchyma_precursor
CB:Z:CAACGTAGTACTTCAG-pool21	5428	2071	2782	0	3114	3.49332	0.38154	0.512528	0	5428	10x	tenx_B73	B73	NA	2.04901	5.25795	0.161538	singlet	3	Axillary_meristem
CB:Z:TGATCAGAGCTACGCC-pool21	1440	403	418	0	871	2.94002	0.279861	0.290278	0	1440	10x	tenx_B73	B73	NA	2.01304	4.23384	0.103846	singlet	3	Axillary_meristem
CB:Z:TACCTCGCAGTATCTG-pool21	2914	1002	1301	0	1727	3.23729	0.343857	0.446465	0	2914	10x	tenx_B73	B73	NA	2.25208	5.70698	0.136538	singlet	3	Axillary_meristem
CB:Z:CTCAGAACATTACTTC-pool21	17323	3801	4397	0	9355	3.97104	0.219419	0.253824	0	17323	10x	tenx_B73	B73	NA	-1.33383	0.646031	0.163462	singlet	5	Ground_meristem
CB:Z:GTCCATCTCGATGAAA-pool21	55808	20295	25162	2	26420	4.42193	0.363658	0.450867	3.58372e-05	55808	10x	tenx_B73	B73	NA	-2.13392	2.79245	0.128846	singlet	12	Epidermis
CB:Z:ACATGGTTCATGCTTT-pool21	8996	3098	4015	0	5198	3.71584	0.344375	0.446309	0	8996	10x	tenx_B73	B73	NA	2.24792	5.73952	0.125	singlet	3	Axillary_meristem
CB:Z:ACTACCCAGCCTTTGA-pool21	29049	7138	7489	0	15787	4.1983	0.245723	0.257806	0	29049	10x	tenx_B73	B73	NA	1.02217	0.277487	0.138462	singlet	5	Ground_meristem
CB:Z:GTGTCCTTCTCCACTG-pool21	10573	3609	5300	0	5513	3.74139	0.341341	0.501277	0	10573	10x	tenx_B73	B73	NA	1.11084	-0.229788	0.0846154	singlet	5	Ground_meristem
CB:Z:GGAATCTAGACGCCAA-pool21	11867	4852	7418	0	6089	3.78455	0.408865	0.625095	0	11867	10x	tenx_B73	B73	NA	1.84527	-1.14686	0.0865385	singlet	7	Ground_meristem
CB:Z:GTCACAAAGACGCCAA-pool21	12530	5009	7783	0	6360	3.80346	0.399761	0.621149	0	12530	10x	tenx_B73	B73	NA	1.85509	-1.20735	0.1	singlet	7	Ground_meristem
CB:Z:CAGCCTTAGAACGCCA-pool21	2148	488	597	0	1176	3.07041	0.227188	0.277933	0	2148	10x	tenx_B73	B73	NA	2.59513	-0.0124665	0.109615	singlet	11	Mesophyll
CB:Z:TGTTAGGAGAACGCCA-pool21	1506	373	405	0	816	2.91169	0.247676	0.268924	0	1506	10x	tenx_B73	B73	NA	2.59469	0.0504059	0.0961538	singlet	11	Mesophyll
CB:Z:GACTAACTCATCGCAA-pool21	7137	1569	2410	0	3773	3.57669	0.21984	0.337677	0	7137	10x	tenx_B73	B73	NA	1.1122	0.40103	0.15	singlet	5	Ground_meristem
CB:Z:AGATTCGAGAAGAGTG-pool21	10117	2426	2898	0	5569	3.74578	0.239794	0.286449	0	10117	10x	tenx_B73	B73	NA	1.10707	-2.6302	0.075	singlet	2	Bundle_sheath
CB:Z:TCTATTGAGTCGCGTC-pool21	14344	5166	5086	0	9452	3.97552	0.360151	0.354573	0	14344	10x	tenx_B73	B73	NA	-2.0635	5.16644	0.140385	singlet	9	Vascular_parenchyma_precursor
CB:Z:TAGCGGCCAATTGTGC-pool21	19781	4328	5492	0	10706	4.02963	0.218796	0.27764	0	19781	10x	tenx_B73	B73	NA	-2.21436	2.85695	0.113462	singlet	12	Epidermis
CB:Z:CCTCCCTAGTATACGA-pool21	7397	1700	1782	0	4089	3.61162	0.229823	0.240908	0	7397	10x	tenx_B73	B73	NA	1.01895	0.535397	0.180769	singlet	5	Ground_meristem
CB:Z:CTGGGACGTCTGGTTA-pool21	1380	389	508	0	822	2.91487	0.281884	0.368116	0	1380	10x	tenx_B73	B73	NA	1.90901	5.03331	0.075	singlet	3	Axillary_meristem
CB:Z:CCTTGCACAAAGAAGG-pool21	14398	3648	3927	4	8710	3.94002	0.253369	0.272746	0.000277816	14398	10x	tenx_B73	B73	NA	-0.606754	4.70219	0.105769	singlet	9	Vascular_parenchyma_precursor
CB:Z:GCATTGAAGTTCAACC-pool21	41955	13561	17412	2	21224	4.32683	0.323227	0.415016	4.76701e-05	41955	10x	tenx_B73	B73	NA	4.89841	-1.95612	0.134615	singlet	13	Bundle_sheath
CB:Z:CAACGTATCGATGCAT-pool21	1444	347	332	0	830	2.91908	0.240305	0.229917	0	1444	10x	tenx_B73	B73	NA	-2.32172	-3.24358	0.0403846	singlet	1	Protoderm
CB:Z:TAAGCCACAGGTGGTA-pool21	1285	411	448	0	732	2.86451	0.319844	0.348638	0	1285	10x	tenx_B73	B73	NA	-0.848018	3.32312	0.0596154	singlet	9	Vascular_parenchyma_precursor
CB:Z:AGTCAACGTCCAAGTT-pool21	3363	1093	1086	0	1967	3.2938	0.325007	0.322926	0	3363	10x	tenx_B73	B73	NA	1.96093	4.91147	0.0326923	singlet	3	Axillary_meristem
CB:Z:CGTACAAGTCTGGGAA-pool21	15637	5047	7514	0	8073	3.90703	0.32276	0.480527	0	15637	10x	tenx_B73	B73	NA	2.88237	-0.382355	0.151923	singlet	11	Mesophyll
CB:Z:TAGGTCAAGCAGAATT-pool21	18458	4989	6389	6	9801	3.99127	0.270289	0.346137	0.000325062	18458	10x	tenx_B73	B73	NA	0.808483	-0.0465008	0.178846	singlet	5	Ground_meristem
CB:Z:GAGGATGCAACTACTG-pool21	1394	294	384	0	779	2.89154	0.210904	0.275466	0	1394	10x	tenx_B73	B73	NA	1.19923	0.595889	0.0923077	singlet	5	Ground_meristem
CB:Z:TGCCTCACAAGGGAGG-pool21	5674	1726	1994	0	3307	3.51943	0.304195	0.351428	0	5674	10x	tenx_B73	B73	NA	3.09399	-0.47281	0.0480769	singlet	11	Mesophyll
CB:Z:GTGCACGCACACACAT-pool21	10633	3214	3932	0	6094	3.7849	0.302267	0.369792	0	10633	10x	tenx_B73	B73	NA	2.23695	4.90078	0.0403846	singlet	3	Axillary_meristem
CB:Z:CGCAATATCCCGATTC-pool21	4606	1326	1738	0	2476	3.39375	0.287885	0.377334	0	4606	10x	tenx_B73	B73	NA	1.06868	0.474911	0.167308	singlet	5	Ground_meristem
CB:Z:CATGTTTAGCCAGAAC-pool21	19517	6633	8065	0	10075	4.00325	0.339858	0.413229	0	19517	10x	tenx_B73	B73	NA	2.90312	-0.130818	0.148077	singlet	11	Mesophyll
CB:Z:CGTGGCATCGCGGCAT-pool21	2130	772	977	0	1248	3.09621	0.362441	0.458685	0	2130	10x	tenx_B73	B73	NA	-0.911963	-1.75068	0.119231	singlet	7	Ground_meristem
CB:Z:GCACGCATCGATATGC-pool21	13141	4682	6586	0	7191	3.85679	0.356289	0.50118	0	13141	10x	tenx_B73	B73	NA	-1.53614	-1.20113	0.125	singlet	4	Ground_meristem
CB:Z:CGCTGGAAGAACGCCA-pool21	33739	12226	18140	0	16458	4.21638	0.36237	0.537657	0	33739	10x	tenx_B73	B73	NA	2.41897	-0.845329	0.0711538	singlet	11	Mesophyll
CB:Z:ATTACTCTCTGGAAGG-pool21	15287	3249	4628	2	8050	3.9058	0.212534	0.302741	0.00013083	15287	10x	tenx_B73	B73	NA	1.15815	0.582999	0.173077	singlet	5	Ground_meristem
CB:Z:CTGCGTTCATTGAACC-pool21	18334	6839	8728	0	10588	4.02481	0.373023	0.476055	0	18334	10x	tenx_B73	B73	NA	2.21666	5.7751	0.157692	singlet	3	Axillary_meristem
CB:Z:GCAAAGGCAGCGCGTT-pool21	12535	4392	6334	0	6364	3.80373	0.350379	0.505305	0	12535	10x	tenx_B73	B73	NA	1.53847	-0.873959	0.165385	singlet	5	Ground_meristem
CB:Z:TTCATCACAAACGTTC-pool21	1709	415	478	0	968	2.98588	0.242832	0.279696	0	1709	10x	tenx_B73	B73	NA	5.11359	-1.62885	0.140385	singlet	13	Bundle_sheath
CB:Z:ATCCCTGTCAGCACGC-pool21	11005	3955	5671	0	5584	3.74695	0.359382	0.515311	0	11005	10x	tenx_B73	B73	NA	1.90507	0.161729	0.171154	singlet	11	Mesophyll
CB:Z:AGCTATGAGTCTGGGA-pool21	6737	2420	3524	0	3711	3.56949	0.35921	0.523081	0	6737	10x	tenx_B73	B73	NA	-1.27426	4.07965	0.128846	singlet	9	Vascular_parenchyma_precursor
CB:Z:CTTCTAAGTAAAGGCC-pool21	17285	4837	6680	0	8972	3.95289	0.279838	0.386462	0	17285	10x	tenx_B73	B73	NA	2.15998	-0.020946	0.153846	singlet	11	Mesophyll
CB:Z:AGGACGATCTCTGACC-pool21	16340	4611	6156	0	8671	3.93807	0.282191	0.376744	0	16340	10x	tenx_B73	B73	NA	2.77932	-0.0690462	0.176923	singlet	11	Mesophyll
CB:Z:CTAGGGCCACGTACAT-pool21	2328	857	994	0	1371	3.13704	0.368127	0.426976	0	2328	10x	tenx_B73	B73	NA	2.01808	3.06642	0.0519231	singlet	6	Vascular_parenchyma
CB:Z:TATGTTCCAGATAAGT-pool21	1023	345	389	2	549	2.73957	0.337243	0.380254	0.00195503	1023	10x	tenx_B73	B73	NA	0.289825	-2.15203	0.0423077	singlet	7	Ground_meristem
CB:Z:TCGCAGGAGTCCAGAG-pool21	6743	2224	2676	0	3905	3.59162	0.329824	0.396856	0	6743	10x	tenx_B73	B73	NA	2.14402	5.13387	0.0576923	singlet	3	Axillary_meristem
CB:Z:CGCTAGGAGACCCTAT-pool21	9092	2363	3008	0	4851	3.68583	0.259899	0.33084	0	9092	10x	tenx_B73	B73	NA	2.92657	-0.302848	0.103846	singlet	11	Mesophyll
CB:Z:CGCTAGGAGGGCTTCC-pool21	1688	498	670	0	928	2.96755	0.295024	0.396919	0	1688	10x	tenx_B73	B73	NA	2.95476	-0.271787	0.0846154	singlet	11	Mesophyll
CB:Z:CGTGGCACAGCAACAG-pool21	1026	237	238	0	583	2.76567	0.230994	0.231969	0	1026	10x	tenx_B73	B73	NA	-3.14097	-3.47134	0.0788462	singlet	14	Procabium
CB:Z:GCTCCTATCGGTGATT-pool21	14318	4595	5052	0	8138	3.91052	0.320925	0.352843	0	14318	10x	tenx_B73	B73	NA	3.64731	-0.612084	0.0923077	singlet	11	Mesophyll
CB:Z:TTTACGTGTTACTTTC-pool21	36071	8895	9486	0	19977	4.30053	0.246597	0.262981	0	36071	10x	tenx_B73	B73	NA	0.80754	0.359729	0.161538	singlet	5	Ground_meristem
CB:Z:GATTAGCCAATGACTC-pool21	10254	3383	4750	0	5352	3.72852	0.32992	0.463234	0	10254	10x	tenx_B73	B73	NA	1.9611	0.143344	0.128846	singlet	11	Mesophyll
CB:Z:GCAGATTTCCACCTAC-pool21	2376	998	1397	0	1301	3.11428	0.420034	0.587963	0	2376	10x	tenx_B73	B73	NA	-2.46363	-3.19175	0.109615	singlet	14	Procabium
CB:Z:GCATTCCAGGGATCCA-pool21	6320	1909	2240	0	3644	3.56158	0.302057	0.35443	0	6320	10x	tenx_B73	B73	NA	-0.934811	4.29527	0.0557692	singlet	9	Vascular_parenchyma_precursor
CB:Z:ATTACCTCATCCCTTG-pool21	44145	15843	21077	2	20673	4.3154	0.358885	0.477449	4.53052e-05	44145	10x	tenx_B73	B73	NA	5.02748	-1.76286	0.161538	singlet	13	Bundle_sheath
CB:Z:GAATCTGGTCAGTGTT-pool21	4556	1515	2125	0	2344	3.36996	0.332529	0.466418	0	4556	10x	tenx_B73	B73	NA	-1.70886	5.5924	0.125	singlet	9	Vascular_parenchyma_precursor
CB:Z:TGTTAGGGTCTGGATT-pool21	1487	359	519	0	831	2.9196	0.241426	0.349025	0	1487	10x	tenx_B73	B73	NA	1.20617	0.600577	0.0807692	singlet	5	Ground_meristem
CB:Z:CGTTCCAAGATGGGAA-pool21	3032	1080	1220	0	1758	3.24502	0.356201	0.402375	0	3032	10x	tenx_B73	B73	NA	1.9667	4.76944	0.0673077	singlet	3	Axillary_meristem
CB:Z:TGAGCCGCATCGCCTT-pool21	10916	3657	5435	0	5599	3.74811	0.335013	0.497893	0	10916	10x	tenx_B73	B73	NA	3.15488	-0.0525129	0.121154	singlet	11	Mesophyll
CB:Z:AATGTCGCAGCCGAAA-pool21	61085	23898	26453	0	31675	4.50072	0.391225	0.433052	0	61085	10x	tenx_B73	B73	NA	-1.76749	5.31206	0.0942308	singlet	9	Vascular_parenchyma_precursor
CB:Z:CCAGATAAGTGGGACT-pool21	4211	1736	2474	0	2285	3.35889	0.412254	0.587509	0	4211	10x	tenx_B73	B73	NA	-1.94409	-1.85648	0.105769	singlet	4	Ground_meristem
CB:Z:TCCGACTCACCACCAG-pool21	2112	680	828	0	1219	3.086	0.32197	0.392045	0	2112	10x	tenx_B73	B73	NA	2.19057	4.99091	0.0980769	singlet	3	Axillary_meristem
CB:Z:ACTATTCTCCTAAAGC-pool21	1096	498	741	0	585	2.76716	0.45438	0.676095	0	1096	10x	tenx_B73	B73	NA	-2.08365	-1.35413	0.107692	singlet	4	Ground_meristem
CB:Z:TGTACGATCTTCCAGC-pool21	1135	238	237	0	610	2.78533	0.209692	0.208811	0	1135	10x	tenx_B73	B73	NA	2.73733	2.35857	0.105769	singlet	6	Vascular_parenchyma
CB:Z:CAACGTAGTGATCAGG-pool21	28385	9157	12486	0	14117	4.14974	0.3226	0.43988	0	28385	10x	tenx_B73	B73	NA	4.43837	-0.648972	0.121154	singlet	13	Bundle_sheath
CB:Z:CATGTTTCAGATAAGT-pool21	3950	1546	2140	0	2113	3.3249	0.391392	0.541772	0	3950	10x	tenx_B73	B73	NA	-1.46195	-1.56764	0.151923	singlet	4	Ground_meristem
CB:Z:TCTCAGCCAGCAATGG-pool21	2952	1003	1509	0	1644	3.2159	0.33977	0.511179	0	2952	10x	tenx_B73	B73	NA	2.67421	-0.53367	0.0846154	singlet	11	Mesophyll
CB:Z:TCTATTGGTCCTCAGG-pool21	86095	30119	40573	10	39685	4.59863	0.349834	0.471258	0.000116151	86095	10x	tenx_B73	B73	NA	-1.59423	5.26261	0.182692	singlet	9	Vascular_parenchyma_precursor
CB:Z:TCAGCTCAGTCGATAA-pool21	1490	526	652	0	812	2.90956	0.35302	0.437584	0	1490	10x	tenx_B73	B73	NA	-1.2755	-3.57049	0.146154	singlet	2	Bundle_sheath
CB:Z:AAATGCCTCCCAGTAA-pool21	5323	2167	3022	0	3007	3.47813	0.407101	0.567725	0	5323	10x	tenx_B73	B73	NA	2.08732	5.42812	0.0826923	singlet	3	Axillary_meristem
CB:Z:CGGACTGAGTACTCTG-pool21	1111	297	392	0	648	2.81158	0.267327	0.352835	0	1111	10x	tenx_B73	B73	NA	-0.676491	4.68566	0.0961538	singlet	9	Vascular_parenchyma_precursor
CB:Z:GGAACTTAGAACGCCA-pool21	6815	1707	1895	0	3719	3.57043	0.250477	0.278063	0	6815	10x	tenx_B73	B73	NA	2.56605	0.0394889	0.119231	singlet	11	Mesophyll
CB:Z:GGAACTTGTGTGTGCC-pool21	37245	14511	20590	0	17657	4.24692	0.389609	0.552826	0	37245	10x	tenx_B73	B73	NA	-1.88784	5.12516	0.0788462	singlet	9	Vascular_parenchyma_precursor
CB:Z:TTAGCGAGTAATGTGA-pool21	6751	2081	2909	0	3535	3.54839	0.308251	0.430899	0	6751	10x	tenx_B73	B73	NA	0.0138465	-1.12517	0.0903846	singlet	7	Ground_meristem
CB:Z:ACAGGCCTCCTAAGTG-pool21	21328	6775	9562	0	11066	4.04399	0.317658	0.448331	0	21328	10x	tenx_B73	B73	NA	2.9421	-0.160356	0.130769	singlet	11	Mesophyll
CB:Z:GCAGCCATCCTTCGAC-pool21	8142	3089	3784	2	4710	3.67302	0.379391	0.464751	0.00024564	8142	10x	tenx_B73	B73	NA	3.3594	-0.212013	0.0865385	singlet	11	Mesophyll
CB:Z:TGTTAGGTCTAAGGTC-pool21	9083	2757	2761	0	6065	3.78283	0.303534	0.303974	0	9083	10x	tenx_B73	B73	NA	4.77013	-0.821397	0.0903846	singlet	13	Bundle_sheath
CB:Z:TCACCTGGTAGTCTGT-pool21	14626	3329	4235	0	7919	3.89867	0.227608	0.289553	0	14626	10x	tenx_B73	B73	NA	1.16918	0.597534	0.115385	singlet	5	Ground_meristem
CB:Z:AAAGGGCTCCCAGTAA-pool21	28776	9268	11593	0	14983	4.1756	0.322074	0.40287	0	28776	10x	tenx_B73	B73	NA	0.767463	-0.362765	0.190385	singlet	5	Ground_meristem
CB:Z:GCTCGAGAGAGGTGGG-pool21	2643	1033	1465	2	1532	3.18526	0.390844	0.554294	0.000756716	2643	10x	tenx_B73	B73	NA	-1.00104	4.12974	0.125	singlet	9	Vascular_parenchyma_precursor
CB:Z:CACAACAGTGTGCTTA-pool21	4226	1500	1836	0	2437	3.38686	0.354946	0.434453	0	4226	10x	tenx_B73	B73	NA	2.02294	5.40855	0.151923	singlet	3	Axillary_meristem
CB:Z:GTGCTGGCAGTGCGAA-pool21	5973	1787	2306	0	3208	3.50623	0.29918	0.386071	0	5973	10x	tenx_B73	B73	NA	-1.85129	-2.19989	0.15	singlet	4	Ground_meristem
CB:Z:AGTGTACCATACCCGG-pool21	13823	2974	3097	0	7822	3.89332	0.215149	0.224047	0	13823	10x	tenx_B73	B73	NA	-0.563041	-6.44966	0.182692	singlet	8	Phloem
CB:Z:CTCTAGCGTCCATTGA-pool21	11296	2975	3798	0	6050	3.78176	0.263368	0.336225	0	11296	10x	tenx_B73	B73	NA	0.967631	0.17432	0.151923	singlet	5	Ground_meristem
CB:Z:GTAATCGAGTTGAATG-pool21	33497	8445	9366	4	18092	4.25749	0.252112	0.279607	0.000119414	33497	10x	tenx_B73	B73	NA	1.14275	0.207199	0.0480769	singlet	5	Ground_meristem
CB:Z:CTTGCCAGTTTCGTTT-pool21	3723	886	849	0	2116	3.32552	0.23798	0.228042	0	3723	10x	tenx_B73	B73	NA	4.19563	-1.22568	0.0961538	singlet	13	Bundle_sheath
CB:Z:CACCACTAGGAATGGA-pool21	58376	21491	28301	0	27592	4.44078	0.368148	0.484805	0	58376	10x	tenx_B73	B73	NA	-1.65578	5.27452	0.117308	singlet	9	Vascular_parenchyma_precursor
CB:Z:AGCCTCTCAAACCTAC-pool21	1147	263	307	0	663	2.82151	0.229294	0.267655	0	1147	10x	tenx_B73	B73	NA	-0.513654	2.84875	0.109615	singlet	6	Vascular_parenchyma
CB:Z:TTGTTGTCAAGAAACT-pool21	23426	4960	5288	0	13166	4.11945	0.211731	0.225732	0	23426	10x	tenx_B73	B73	NA	-3.23131	2.63032	0.159615	singlet	5	Ground_meristem
CB:Z:GGTGTCGTCTCGGCGA-pool21	3836	1303	1873	0	2001	3.30125	0.339677	0.488269	0	3836	10x	tenx_B73	B73	NA	1.92983	0.14684	0.126923	singlet	11	Mesophyll
CB:Z:AATGGCTCATTACTCT-pool21	24090	6681	7530	0	12648	4.10202	0.277335	0.312578	0	24090	10x	tenx_B73	B73	NA	-1.07118	-6.17852	0.171154	singlet	5	Ground_meristem
CB:Z:GACCTTCCATAGACGG-pool21	32800	10457	13048	0	16913	4.22822	0.318811	0.397805	0	32800	10x	tenx_B73	B73	NA	1.02184	0.389401	0.194231	singlet	5	Ground_meristem
CB:Z:GCACGGTGTCCACCAG-pool21	2194	808	957	0	1148	3.05994	0.368277	0.43619	0	2194	10x	tenx_B73	B73	NA	-1.81256	5.44614	0.075	singlet	9	Vascular_parenchyma_precursor
CB:Z:AACCTGATCCGGGCAT-pool21	3111	770	700	0	1770	3.24797	0.247509	0.225008	0	3111	10x	tenx_B73	B73	NA	-0.469098	2.94931	0.121154	singlet	9	Vascular_parenchyma_precursor
CB:Z:GATCATGGTTCTCGAA-pool21	12231	4840	6939	0	6418	3.8074	0.395716	0.567329	0	12231	10x	tenx_B73	B73	NA	-2.07197	5.32042	0.1	singlet	9	Vascular_parenchyma_precursor
CB:Z:GAGTGAGTCCATACGA-pool21	21814	7210	8043	2	11294	4.05285	0.330522	0.368708	9.16842e-05	21814	10x	tenx_B73	B73	NA	2.24349	0.124821	0.126923	singlet	11	Mesophyll
CB:Z:CTCTACGGTCTTAGCA-pool21	22512	6658	8364	2	11716	4.06878	0.295753	0.371535	8.88415e-05	22512	10x	tenx_B73	B73	NA	3.24093	2.01625	0.0923077	singlet	6	Vascular_parenchyma
CB:Z:GGCATTACACAGTTCA-pool21	2905	739	938	0	1604	3.2052	0.254389	0.322892	0	2905	10x	tenx_B73	B73	NA	1.04712	0.629585	0.138462	singlet	5	Ground_meristem
CB:Z:TCCAGAATCCCTAAAG-pool21	9066	3163	4380	4	5208	3.71667	0.348886	0.483124	0.000441209	9066	10x	tenx_B73	B73	NA	2.24805	5.71984	0.126923	singlet	3	Axillary_meristem
CB:Z:TTGGTCCAGGTAAGTT-pool21	7504	1943	2379	0	3980	3.59988	0.258929	0.317031	0	7504	10x	tenx_B73	B73	NA	4.3151	-0.998417	0.0903846	singlet	13	Bundle_sheath
CB:Z:AGTCAACGTGTTGTTG-pool21	1356	517	738	0	753	2.87679	0.381268	0.544248	0	1356	10x	tenx_B73	B73	NA	3.22107	-0.264151	0.0673077	singlet	11	Mesophyll
CB:Z:AGTCAACGTTTAGAAG-pool21	15643	5285	7390	2	7949	3.90031	0.337851	0.472416	0.000127853	15643	10x	tenx_B73	B73	NA	3.23354	-0.203645	0.0673077	singlet	11	Mesophyll
CB:Z:TAAACCGTCGCCTTAC-pool21	23010	9257	11812	0	11367	4.05565	0.402303	0.513342	0	23010	10x	tenx_B73	B73	NA	-2.26329	3.3432	0.0961538	singlet	9	Vascular_parenchyma_precursor
CB:Z:TTACGGAAGAACCATA-pool21	12431	2521	2807	0	6761	3.83001	0.202799	0.225806	0	12431	10x	tenx_B73	B73	NA	0.809652	0.47292	0.132692	singlet	5	Ground_meristem
CB:Z:CCCTGATTCACCCTTG-pool21	24209	8531	11231	0	12174	4.08543	0.35239	0.463918	0	24209	10x	tenx_B73	B73	NA	4.94952	-1.614	0.0884615	singlet	13	Bundle_sheath
CB:Z:GGGCCATAGACAGCTG-pool21	1171	278	348	0	649	2.81224	0.237404	0.297182	0	1171	10x	tenx_B73	B73	NA	2.73177	-0.289051	0.123077	singlet	11	Mesophyll
CB:Z:CGCAGGTTCGCCCTTA-pool21	2358	654	819	0	1381	3.14019	0.277354	0.347328	0	2358	10x	tenx_B73	B73	NA	2.9401	-2.12005	0.125	singlet	2	Bundle_sheath
CB:Z:TTGACGATCAGTCAAC-pool21	1226	260	409	0	677	2.83059	0.212072	0.333605	0	1226	10x	tenx_B73	B73	NA	1.17861	0.59286	0.194231	singlet	5	Ground_meristem
CB:Z:TGCTTTAGTTCCCTTG-pool21	10641	3483	5433	4	5511	3.74123	0.327319	0.510572	0.000375905	10641	10x	tenx_B73	B73	NA	1.52599	-0.743893	0.123077	singlet	5	Ground_meristem
CB:Z:GCGGGTTAGAACGTCG-pool21	1341	368	456	0	751	2.87564	0.274422	0.340045	0	1341	10x	tenx_B73	B73	NA	2.69264	-0.684738	0.0865385	singlet	11	Mesophyll
CB:Z:TTGCTATAGCATTGGG-pool21	1664	639	945	0	901	2.95472	0.384014	0.567909	0	1664	10x	tenx_B73	B73	NA	1.61035	-1.5146	0.0923077	singlet	7	Ground_meristem
CB:Z:CTGCTCATCGTCTTAT-pool21	1508	479	634	0	876	2.9425	0.317639	0.420424	0	1508	10x	tenx_B73	B73	NA	1.97765	5.30054	0.0480769	singlet	3	Axillary_meristem
CB:Z:GTCACGGTCATCGCCT-pool21	2078	615	731	0	1166	3.0667	0.295958	0.351781	0	2078	10x	tenx_B73	B73	NA	2.8206	-0.0310181	0.0653846	singlet	11	Mesophyll
CB:Z:ACCCAAATCACAGGGA-pool21	1724	440	570	0	1011	3.00475	0.25522	0.330626	0	1724	10x	tenx_B73	B73	NA	2.23831	-0.658603	0.05	singlet	11	Mesophyll
CB:Z:GACCTTCAGATCGATA-pool21	33693	9274	10886	0	18361	4.2639	0.27525	0.323094	0	33693	10x	tenx_B73	B73	NA	2.32022	0.113853	0.167308	singlet	11	Mesophyll
CB:Z:TTGAGTGGTAGATGAT-pool21	1574	418	435	0	950	2.97772	0.265565	0.276366	0	1574	10x	tenx_B73	B73	NA	-2.16553	1.047	0.0711538	singlet	4	Ground_meristem
CB:Z:AGATTCGGTTGGGAAC-pool21	3535	1031	1255	0	2055	3.31281	0.291655	0.355021	0	3535	10x	tenx_B73	B73	NA	0.633805	2.79038	0.101923	singlet	1	Protoderm
CB:Z:GAACGTTCACTAAACC-pool21	15881	4095	4745	0	8434	3.92603	0.257855	0.298785	0	15881	10x	tenx_B73	B73	NA	3.02155	1.40123	0.148077	singlet	5	Ground_meristem
CB:Z:ACCGGGTAGTGTGTAA-pool21	2526	827	895	0	1472	3.16791	0.327395	0.354315	0	2526	10x	tenx_B73	B73	NA	4.01117	-0.918506	0.0884615	singlet	11	Mesophyll
CB:Z:TTGCTTAAGAGTCCGA-pool21	5746	1822	2275	0	3312	3.52009	0.31709	0.395928	0	5746	10x	tenx_B73	B73	NA	2.09459	5.01907	0.0673077	singlet	3	Axillary_meristem
CB:Z:GAATCTGCAAATGCTC-pool21	1377	332	405	0	787	2.89597	0.241104	0.294118	0	1377	10x	tenx_B73	B73	NA	0.718862	-3.43818	0.0884615	singlet	2	Bundle_sheath
CB:Z:GCCCGAACAAACAGTA-pool21	2394	729	861	0	1381	3.14019	0.304511	0.359649	0	2394	10x	tenx_B73	B73	NA	2.00153	4.43013	0.0557692	singlet	3	Axillary_meristem
CB:Z:AGCTGATAGTGTGTAA-pool21	9821	2967	3400	0	5540	3.74351	0.302108	0.346197	0	9821	10x	tenx_B73	B73	NA	4.2889	-0.7342	0.0865385	singlet	11	Mesophyll
CB:Z:CAAGGCCAGTGTGTAA-pool21	7673	2504	2818	0	4400	3.64345	0.326339	0.367262	0	7673	10x	tenx_B73	B73	NA	4.15048	-0.734977	0.101923	singlet	11	Mesophyll
CB:Z:GCTCAGGCAAGTCCTA-pool21	1759	535	642	0	1032	3.01368	0.30415	0.36498	0	1759	10x	tenx_B73	B73	NA	1.57226	4.35655	0.075	singlet	3	Axillary_meristem
CB:Z:ACCTGCTGTCAGAAAT-pool21	3594	1113	1497	0	2120	3.32634	0.309683	0.416528	0	3594	10x	tenx_B73	B73	NA	2.10479	5.24068	0.0692308	singlet	3	Axillary_meristem
CB:Z:ACCAAACTCTTAACGG-pool21	7530	1708	2265	0	4121	3.615	0.226826	0.300797	0	7530	10x	tenx_B73	B73	NA	0.962726	0.476957	0.163462	singlet	5	Ground_meristem
CB:Z:CGTAAACAGGCAAGGG-pool21	4937	1653	2188	0	2706	3.43233	0.334819	0.443184	0	4937	10x	tenx_B73	B73	NA	-2.2767	-1.87316	0.0942308	singlet	4	Ground_meristem
CB:Z:TAACGGTTCGGGAAAC-pool21	2259	801	1095	0	1235	3.09167	0.354582	0.484728	0	2259	10x	tenx_B73	B73	NA	-1.19559	-1.71826	0.107692	singlet	4	Ground_meristem
CB:Z:GGTTGCGTCGCTATTT-pool21	5611	1444	1687	0	3206	3.50596	0.257352	0.300659	0	5611	10x	tenx_B73	B73	NA	2.39741	-1.15288	0.0942308	singlet	12	Epidermis
CB:Z:GAGCATTGTGGGTAGT-pool21	32738	9770	12460	0	16993	4.23027	0.29843	0.380597	0	32738	10x	tenx_B73	B73	NA	1.20153	0.2623	0.117308	singlet	5	Ground_meristem
CB:Z:ACTTTCAGTTTGACCA-pool21	4256	1289	1720	0	2419	3.38364	0.302867	0.404135	0	4256	10x	tenx_B73	B73	NA	2.23987	5.7743	0.163462	singlet	3	Axillary_meristem
CB:Z:TGGTCAAGTCAGGCTC-pool21	4999	1700	2183	0	2863	3.45682	0.340068	0.436687	0	4999	10x	tenx_B73	B73	NA	-1.53338	3.84065	0.107692	singlet	9	Vascular_parenchyma_precursor
CB:Z:GACCTTCCAAACCCTA-pool21	6260	1313	1728	2	3445	3.53719	0.209744	0.276038	0.000319489	6260	10x	tenx_B73	B73	NA	1.08621	0.411009	0.169231	singlet	5	Ground_meristem
CB:Z:TCCAGAAAGTCCCTCT-pool21	20158	4120	5048	0	10694	4.02914	0.204385	0.250422	0	20158	10x	tenx_B73	B73	NA	1.00962	0.487864	0.155769	singlet	5	Ground_meristem
CB:Z:AGCCTCTTCGTCCCAT-pool21	21121	5156	6596	0	11178	4.04836	0.244117	0.312296	0	21121	10x	tenx_B73	B73	NA	1.68655	0.0568684	0.184615	singlet	11	Mesophyll
CB:Z:GAAGAGCCAATGGTCT-pool21	9670	2896	3550	0	5362	3.72933	0.299483	0.367115	0	9670	10x	tenx_B73	B73	NA	-1.66716	5.09512	0.119231	singlet	9	Vascular_parenchyma_precursor
CB:Z:GGCATTAGTTTCCGGG-pool21	19369	5847	7301	0	10337	4.01439	0.301874	0.376943	0	19369	10x	tenx_B73	B73	NA	-1.67189	5.10365	0.144231	singlet	9	Vascular_parenchyma_precursor
CB:Z:AAAGGATTCTATACCT-pool21	5909	1472	1782	0	3227	3.5088	0.249112	0.301574	0	5909	10x	tenx_B73	B73	NA	4.76127	-2.00153	0.144231	singlet	13	Bundle_sheath
CB:Z:GGCACGTGTTCCCGGA-pool21	22690	7960	10935	0	11641	4.06599	0.350815	0.48193	0	22690	10x	tenx_B73	B73	NA	2.69068	-0.280851	0.132692	singlet	11	Mesophyll
CB:Z:TGATGCACATTGCCTC-pool21	15094	4171	6340	0	7843	3.89448	0.276335	0.420034	0	15094	10x	tenx_B73	B73	NA	0.930508	-0.171548	0.119231	singlet	5	Ground_meristem
CB:Z:TAGCATGGTCCTTCAC-pool21	6561	1994	2357	0	3369	3.5275	0.303917	0.359244	0	6561	10x	tenx_B73	B73	NA	1.10829	0.536142	0.0884615	singlet	5	Ground_meristem
CB:Z:CGTTCCAGTACGGTTT-pool21	17276	3858	5118	0	9401	3.97317	0.223316	0.296249	0	17276	10x	tenx_B73	B73	NA	0.975453	0.249885	0.186538	singlet	5	Ground_meristem
CB:Z:GACCAATAGACCCTAT-pool21	43703	17411	23002	0	20969	4.32158	0.398394	0.526325	0	43703	10x	tenx_B73	B73	NA	-1.97022	5.19616	0.111538	singlet	9	Vascular_parenchyma_precursor
CB:Z:CAGTGCGCATCCTGGG-pool21	1357	295	280	0	792	2.89873	0.217391	0.206338	0	1357	10x	tenx_B73	B73	NA	-0.014599	-0.203737	0.117308	singlet	1	Protoderm
CB:Z:ATGTCTTGTGATGCTT-pool21	8801	2634	3747	0	4617	3.66436	0.299284	0.425747	0	8801	10x	tenx_B73	B73	NA	1.10346	0.614577	0.0884615	singlet	5	Ground_meristem
CB:Z:GCGATTAAGGCGATTG-pool21	1961	427	460	0	1089	3.03703	0.217746	0.234574	0	1961	10x	tenx_B73	B73	NA	0.848715	-1.00445	0.103846	singlet	7	Ground_meristem
CB:Z:TGGGTGCCATCGGCCA-pool21	2334	933	1367	0	1257	3.09934	0.399743	0.58569	0	2334	10x	tenx_B73	B73	NA	-0.27621	-2.39854	0.0903846	singlet	4	Ground_meristem
CB:Z:GGTGAAGCAGATACAA-pool21	18647	6339	8313	2	10649	4.02731	0.339947	0.445809	0.000107256	18647	10x	tenx_B73	B73	NA	-0.619263	4.70103	0.0980769	singlet	9	Vascular_parenchyma_precursor
CB:Z:GCACGGTAGGTGTTGG-pool21	8446	2966	3898	0	4836	3.68449	0.351172	0.46152	0	8446	10x	tenx_B73	B73	NA	2.20788	5.67483	0.126923	singlet	3	Axillary_meristem
CB:Z:TGACTCCGTAAGGTCG-pool21	1942	552	689	0	1126	3.05154	0.284243	0.354789	0	1942	10x	tenx_B73	B73	NA	-2.69308	-3.04637	0.0942308	singlet	14	Procabium
CB:Z:AGGCCTGCAGGGAGTT-pool21	2760	902	1048	0	1591	3.20167	0.326812	0.37971	0	2760	10x	tenx_B73	B73	NA	1.68272	4.92968	0.0903846	singlet	3	Axillary_meristem
CB:Z:GGATGAGCAATGCATC-pool21	1116	246	265	0	649	2.81224	0.22043	0.237455	0	1116	10x	tenx_B73	B73	NA	2.28428	-0.0383001	0.132692	singlet	11	Mesophyll
CB:Z:TAATCGGTCACCCTTG-pool21	3388	1100	1366	0	1945	3.28892	0.324675	0.403188	0	3388	10x	tenx_B73	B73	NA	1.85611	4.96117	0.0596154	singlet	3	Axillary_meristem
CB:Z:TCACAAGAGCGCATTT-pool21	10935	2983	3525	0	6039	3.78097	0.272794	0.322359	0	10935	10x	tenx_B73	B73	NA	0.691132	-0.116647	0.132692	singlet	5	Ground_meristem
CB:Z:TTCATTGTCCTGTGGG-pool21	5458	2162	2800	2	3191	3.50393	0.396116	0.513008	0.000366435	5458	10x	tenx_B73	B73	NA	2.30383	5.46594	0.151923	singlet	3	Axillary_meristem
CB:Z:GTGATCAGTTTGTGAC-pool21	5079	1852	2526	0	2968	3.47246	0.364639	0.497342	0	5079	10x	tenx_B73	B73	NA	-0.883955	-1.72665	0.109615	singlet	3	Axillary_meristem
CB:Z:TACCTCGAGCGCCTAC-pool21	1656	442	483	0	941	2.97359	0.266908	0.291667	0	1656	10x	tenx_B73	B73	NA	2.21975	4.04074	0.0442308	singlet	1	Protoderm
CB:Z:ACTAGGTTCGCAGATT-pool21	10642	3637	4666	0	6176	3.79071	0.341759	0.438451	0	10642	10x	tenx_B73	B73	NA	2.1272	5.77586	0.142308	singlet	3	Axillary_meristem
CB:Z:GTGGATTAGCTTACCA-pool21	4044	840	820	0	2338	3.36884	0.207715	0.20277	0	4044	10x	tenx_B73	B73	NA	2.98726	-0.233011	0.0576923	singlet	11	Mesophyll
CB:Z:TTGAGCAAGCATTGGG-pool21	24282	8457	11533	4	12425	4.0943	0.348283	0.474961	0.000164731	24282	10x	tenx_B73	B73	NA	2.59865	-0.210221	0.0942308	singlet	11	Mesophyll
CB:Z:TTCATTGTCCAGTTAG-pool21	13969	3967	4249	0	8008	3.90352	0.283986	0.304174	0	13969	10x	tenx_B73	B73	NA	2.72851	0.0348436	0.105769	singlet	11	Mesophyll
CB:Z:CTTGCCATCAGGCGCT-pool21	6923	2448	3236	0	4054	3.60788	0.353604	0.467427	0	6923	10x	tenx_B73	B73	NA	2.22416	5.77328	0.115385	singlet	3	Axillary_meristem
CB:Z:TATCGAGCACGGTGTC-pool21	14735	3574	3040	0	9488	3.97717	0.242552	0.206312	0	14735	10x	tenx_B73	B73	NA	1.0443	0.35113	0.163462	singlet	5	Ground_meristem
CB:Z:GTGGCGTGTGTTTCTT-pool21	7651	2357	2900	0	4415	3.64493	0.308064	0.379035	0	7651	10x	tenx_B73	B73	NA	2.93224	-0.266403	0.0634615	singlet	11	Mesophyll
CB:Z:AGTGCGCGTTCCTATT-pool21	21194	6681	7689	0	11927	4.07653	0.315231	0.362791	0	21194	10x	tenx_B73	B73	NA	4.45543	-0.563042	0.0596154	singlet	11	Mesophyll
CB:Z:CATAACGTCCAGGGAA-pool21	2792	776	879	0	1503	3.17696	0.277937	0.314828	0	2792	10x	tenx_B73	B73	NA	-1.60756	5.44858	0.0846154	singlet	9	Vascular_parenchyma_precursor
CB:Z:TAGGTCACACGTTAGT-pool21	1202	304	370	0	670	2.82607	0.252912	0.30782	0	1202	10x	tenx_B73	B73	NA	2.31084	-2.11734	0.121154	singlet	2	Bundle_sheath
CB:Z:GCTGTTCCAGGATGTG-pool21	2266	740	915	0	1223	3.08743	0.326567	0.403795	0	2266	10x	tenx_B73	B73	NA	-2.32317	2.78125	0.107692	singlet	12	Epidermis
CB:Z:ACTTCCGAGGTCTTTG-pool21	9409	3629	4425	0	5365	3.72957	0.385695	0.470294	0	9409	10x	tenx_B73	B73	NA	2.1305	4.8368	0.0538462	singlet	12	Epidermis
CB:Z:GCTTGCTAGGTACATA-pool21	16726	5512	7974	2	8375	3.92298	0.329547	0.476743	0.000119574	16726	10x	tenx_B73	B73	NA	1.95569	0.0957036	0.175	singlet	11	Mesophyll
CB:Z:GCGGGTTGTAGGTCTT-pool21	2348	672	745	0	1401	3.14644	0.286201	0.317291	0	2348	10x	tenx_B73	B73	NA	3.0283	-0.444459	0.0980769	singlet	11	Mesophyll
CB:Z:TTACGTTGTAATGTGA-pool21	31485	8649	10298	0	16462	4.21648	0.274702	0.327076	0	31485	10x	tenx_B73	B73	NA	2.39959	0.0879571	0.0923077	singlet	11	Mesophyll
CB:Z:TGTGGCGGTCTGGGAA-pool21	1350	424	478	0	800	2.90309	0.314074	0.354074	0	1350	10x	tenx_B73	B73	NA	-1.8882	4.27465	0.103846	singlet	9	Vascular_parenchyma_precursor
CB:Z:CCGTACTTCTGTTGCC-pool21	17293	5269	7590	0	8878	3.94832	0.30469	0.438906	0	17293	10x	tenx_B73	B73	NA	4.52604	-0.666771	0.117308	singlet	13	Bundle_sheath
CB:Z:TTGCTATTCTCTATTG-pool21	1620	637	914	0	875	2.94201	0.39321	0.564198	0	1620	10x	tenx_B73	B73	NA	-0.0274362	-3.16078	0.111538	singlet	2	Bundle_sheath
CB:Z:CGGACTGGTGGCATAG-pool21	3688	1198	1527	0	2187	3.33985	0.324837	0.414046	0	3688	10x	tenx_B73	B73	NA	2.88729	-2.29542	0.0865385	singlet	2	Bundle_sheath
CB:Z:GGTGAAGAGTCGCGTC-pool21	5890	1686	1987	0	3503	3.54444	0.286248	0.337351	0	5890	10x	tenx_B73	B73	NA	2.66986	-0.50621	0.123077	singlet	11	Mesophyll
CB:Z:AACGAGGTCCGATGCG-pool21	57380	20341	28322	0	26893	4.42964	0.354496	0.493587	0	57380	10x	tenx_B73	B73	NA	-1.80586	5.21569	0.134615	singlet	9	Vascular_parenchyma_precursor
CB:Z:GGAATCTCAAGGTTCT-pool21	3852	1174	1285	0	2246	3.35141	0.304777	0.333593	0	3852	10x	tenx_B73	B73	NA	-2.31028	-5.09534	0.05	singlet	14	Procabium
CB:Z:TGGACATCATGGCCGT-pool21	1706	544	603	0	1002	3.00087	0.318875	0.353458	0	1706	10x	tenx_B73	B73	NA	1.95186	4.82835	0.0769231	singlet	3	Axillary_meristem
CB:Z:TTGTTCAAGGCTTAAA-pool21	3374	1296	1699	0	1870	3.27184	0.384114	0.503557	0	3374	10x	tenx_B73	B73	NA	-2.01905	5.18902	0.0961538	singlet	9	Vascular_parenchyma_precursor
CB:Z:GGTAGGAGTGTCGTGC-pool21	1018	296	326	0	621	2.79309	0.290766	0.320236	0	1018	10x	tenx_B73	B73	NA	-1.94966	-0.635785	0.075	singlet	12	Epidermis
CB:Z:TTCTAACCACATCATG-pool21	28382	9075	12562	2	14295	4.15518	0.319745	0.442604	7.04672e-05	28382	10x	tenx_B73	B73	NA	1.04064	0.128114	0.182692	singlet	5	Ground_meristem
CB:Z:GCATTCCCACATTGCA-pool21	13202	4045	5785	2	6796	3.83225	0.306393	0.438191	0.000151492	13202	10x	tenx_B73	B73	NA	0.954636	-0.0966672	0.132692	singlet	5	Ground_meristem
CB:Z:GTTGGTAAGACCCATT-pool21	3845	1570	2126	0	2069	3.31576	0.408322	0.552926	0	3845	10x	tenx_B73	B73	NA	-2.10723	3.58254	0.0826923	singlet	9	Vascular_parenchyma_precursor
CB:Z:CAAGCTAGTGGTGGTA-pool21	18542	5601	7812	2	9858	3.99379	0.302071	0.421314	0.000107863	18542	10x	tenx_B73	B73	NA	0.920129	0.0142601	0.0942308	singlet	5	Ground_meristem
CB:Z:GCACCTTCAACTCCCT-pool21	1194	425	484	0	664	2.82217	0.355946	0.40536	0	1194	10x	tenx_B73	B73	NA	-1.18521	-2.19671	0.0673077	singlet	4	Ground_meristem
CB:Z:ACCCAAATCCCGGGTA-pool21	20296	6347	7821	0	10766	4.03205	0.312722	0.385347	0	20296	10x	tenx_B73	B73	NA	1.79498	0.144727	0.157692	singlet	11	Mesophyll
CB:Z:CATGCCTGTGTTGGTT-pool21	1163	473	647	0	643	2.80821	0.406707	0.55632	0	1163	10x	tenx_B73	B73	NA	-2.15988	4.7381	0.0903846	singlet	9	Vascular_parenchyma_precursor
CB:Z:GGCATTAGTCTGGGAA-pool21	2632	882	1167	0	1543	3.18837	0.335106	0.443389	0	2632	10x	tenx_B73	B73	NA	2.93922	-0.563279	0.0307692	singlet	11	Mesophyll
CB:Z:AGCCTCTTCACATCCC-pool21	10509	2622	3302	0	5612	3.74912	0.2495	0.314207	0	10509	10x	tenx_B73	B73	NA	0.937179	0.485087	0.196154	singlet	5	Ground_meristem
CB:Z:GAAGTGGCAACATAAG-pool21	21364	5517	6707	4	11274	4.05208	0.258238	0.313939	0.000187231	21364	10x	tenx_B73	B73	NA	0.848409	-0.141474	0.161538	singlet	5	Ground_meristem
CB:Z:TTGACGAGTTCACGTA-pool21	5646	1693	1752	2	3076	3.48799	0.299858	0.310308	0.000354233	5646	10x	tenx_B73	B73	NA	-1.9259	-0.23608	0.0692308	singlet	12	Epidermis
CB:Z:GAGTGAGCACATCATG-pool21	9304	3931	5656	0	4898	3.69002	0.422506	0.607911	0	9304	10x	tenx_B73	B73	NA	-1.53174	-1.25412	0.136538	singlet	4	Ground_meristem
CB:Z:TCTAGTTCAGTGCTCG-pool21	4292	955	996	0	2322	3.36586	0.222507	0.23206	0	4292	10x	tenx_B73	B73	NA	0.0818304	2.17505	0.134615	singlet	5	Ground_meristem
CB:Z:AATACGCAGCGTGTTT-pool21	10774	3353	4596	2	5622	3.74989	0.311212	0.426583	0.000185632	10774	10x	tenx_B73	B73	NA	5.03009	-1.93189	0.126923	singlet	13	Bundle_sheath
CB:Z:TGGCCTTGTCTGGTTA-pool21	10195	3292	4185	0	5501	3.74044	0.322903	0.410495	0	10195	10x	tenx_B73	B73	NA	2.71053	-0.139429	0.107692	singlet	11	Mesophyll
CB:Z:TGTTAGGAGTCACACT-pool21	3075	1111	1324	0	1773	3.24871	0.361301	0.430569	0	3075	10x	tenx_B73	B73	NA	3.05359	-0.621706	0.0961538	singlet	11	Mesophyll
CB:Z:GCGGTGTTCATGCTTT-pool21	24994	6854	8548	0	13294	4.12366	0.274226	0.342002	0	24994	10x	tenx_B73	B73	NA	4.59961	-2.02641	0.173077	singlet	13	Bundle_sheath
CB:Z:GCTGTTCTCGATAGGG-pool21	46963	16721	21781	0	25554	4.40746	0.356046	0.463791	0	46963	10x	tenx_B73	B73	NA	2.16065	5.79593	0.121154	singlet	3	Axillary_meristem
CB:Z:AACGGGATCAACTTGG-pool21	1883	382	415	0	1061	3.02572	0.202868	0.220393	0	1883	10x	tenx_B73	B73	NA	2.28015	0.255788	0.101923	singlet	11	Mesophyll
CB:Z:GAGCATTGTTGCAGCC-pool21	1607	479	638	0	893	2.95085	0.298071	0.397013	0	1607	10x	tenx_B73	B73	NA	4.03684	-0.330626	0.0692308	singlet	13	Bundle_sheath
CB:Z:TTCGCGTAGCACCATT-pool21	19651	5936	7440	0	10369	4.01574	0.302071	0.378607	0	19651	10x	tenx_B73	B73	NA	1.05359	0.359394	0.190385	singlet	5	Ground_meristem
CB:Z:TTGTTCACATCCTCGT-pool21	1522	320	317	0	868	2.93852	0.21025	0.208279	0	1522	10x	tenx_B73	B73	NA	1.39972	4.27607	0.0711538	singlet	3	Axillary_meristem
CB:Z:TGACTCCTCACTAGGT-pool21	27974	10090	14400	0	13802	4.13994	0.360692	0.514764	0	27974	10x	tenx_B73	B73	NA	2.9961	0.00314981	0.0903846	singlet	11	Mesophyll
CB:Z:TAGCCGGAGCGTCTGC-pool21	7333	1598	1748	2	4022	3.60444	0.217919	0.238374	0.00027274	7333	10x	tenx_B73	B73	NA	-2.30841	0.0379217	0.0538462	singlet	12	Epidermis
CB:Z:CTAACTTAGTTCCAGT-pool21	13092	3418	4763	0	6841	3.83512	0.261075	0.36381	0	13092	10x	tenx_B73	B73	NA	2.1169	0.0114777	0.0942308	singlet	11	Mesophyll
CB:Z:GTGTCCTGTGTGTGTT-pool21	1234	275	250	2	717	2.85552	0.222853	0.202593	0.00162075	1234	10x	tenx_B73	B73	NA	2.62511	-0.12332	0.105769	singlet	11	Mesophyll
CB:Z:TTCATCAAGCATTCCA-pool21	4235	853	916	0	2430	3.38561	0.201417	0.216293	0	4235	10x	tenx_B73	B73	NA	-0.681153	3.05894	0.0442308	singlet	9	Vascular_parenchyma_precursor
CB:Z:GAAGTCTCACTGATAC-pool21	1852	736	912	0	1080	3.03342	0.397408	0.492441	0	1852	10x	tenx_B73	B73	NA	-3.10699	-3.63869	0.0653846	singlet	14	Procabium
CB:Z:CGTGGCAAGTACTCTG-pool21	1294	283	379	0	715	2.85431	0.218702	0.29289	0	1294	10x	tenx_B73	B73	NA	3.33395	-0.113402	0.0634615	singlet	11	Mesophyll
CB:Z:TAGCCCTCATCGCCTT-pool21	4577	1454	1563	0	2633	3.42045	0.317675	0.34149	0	4577	10x	tenx_B73	B73	NA	2.75662	-0.442379	0.128846	singlet	11	Mesophyll
CB:Z:TCAGGTAGTAGCAGGT-pool21	12562	3429	4197	0	6797	3.83232	0.272966	0.334103	0	12562	10x	tenx_B73	B73	NA	-3.68108	3.34578	0.125	singlet	10	Xylem
CB:Z:AGTGTACAGTGGTGTG-pool21	9070	2748	3069	0	5227	3.71825	0.302977	0.338368	0	9070	10x	tenx_B73	B73	NA	4.43324	-0.544196	0.075	singlet	11	Mesophyll
CB:Z:TTACTCACAGGTAGGT-pool21	28790	9585	13029	4	14824	4.17097	0.332928	0.452553	0.000138937	28790	10x	tenx_B73	B73	NA	1.73629	-1.04716	0.125	singlet	11	Mesophyll
CB:Z:TCGAGCGAGGAGTACC-pool21	1641	462	505	0	916	2.9619	0.281536	0.307739	0	1641	10x	tenx_B73	B73	NA	3.25586	1.90102	0.0807692	singlet	6	Vascular_parenchyma
CB:Z:GACCCAGAGTACCACT-pool21	1284	419	439	0	758	2.87967	0.326324	0.3419	0	1284	10x	tenx_B73	B73	NA	1.56061	4.41089	0.0519231	singlet	3	Axillary_meristem
CB:Z:GAATCTGAGAGGCGGA-pool21	1513	448	477	0	813	2.91009	0.2961	0.315268	0	1513	10x	tenx_B73	B73	NA	-1.21399	4.85617	0.0769231	singlet	9	Vascular_parenchyma_precursor
CB:Z:GCACCTTTCAGCACGC-pool21	6618	2205	2761	0	3879	3.58872	0.333182	0.417196	0	6618	10x	tenx_B73	B73	NA	2.72848	4.22129	0.132692	singlet	3	Axillary_meristem
CB:Z:GAAGAGCGTTGTATCG-pool21	2939	988	1303	0	1601	3.20439	0.336169	0.443348	0	2939	10x	tenx_B73	B73	NA	2.81918	-0.177965	0.0807692	singlet	11	Mesophyll
CB:Z:GTGTCAATCGAGAAGC-pool21	26216	11232	17161	0	11702	4.06826	0.428441	0.6546	0	26216	10x	tenx_B73	B73	NA	-1.55573	5.6947	0.1	singlet	9	Vascular_parenchyma_precursor
CB:Z:CGTAAACCAGATGGCA-pool21	8287	2744	3251	0	4370	3.64048	0.331121	0.392301	0	8287	10x	tenx_B73	B73	NA	4.82811	-1.99444	0.0923077	singlet	13	Bundle_sheath
CB:Z:CGTTCCATCAGGATCT-pool21	2783	671	658	0	1611	3.2071	0.241107	0.236436	0	2783	10x	tenx_B73	B73	NA	0.433567	2.45385	0.0865385	singlet	1	Protoderm
CB:Z:CCCAGAGGTCTCGGGT-pool21	10935	2754	3227	2	6112	3.78618	0.251852	0.295107	0.000182899	10935	10x	tenx_B73	B73	NA	2.36684	-0.188261	0.101923	singlet	11	Mesophyll
CB:Z:CTTCCAGTCGCAAGCC-pool21	18012	5645	7522	0	9367	3.9716	0.313402	0.41761	0	18012	10x	tenx_B73	B73	NA	4.57862	-2.01331	0.196154	singlet	13	Bundle_sheath
CB:Z:TGCTATTAGTACCACT-pool21	28319	6996	8783	2	14691	4.16705	0.247043	0.310145	7.0624e-05	28319	10x	tenx_B73	B73	NA	2.72793	0.0600749	0.175	singlet	11	Mesophyll
CB:Z:CGTAAACCATTTAGGC-pool21	6328	1761	2494	0	3332	3.5227	0.278287	0.394121	0	6328	10x	tenx_B73	B73	NA	2.86431	-0.165031	0.103846	singlet	11	Mesophyll
CB:Z:AGCCGCATCGATGTAC-pool21	49555	12872	14420	2	26523	4.42362	0.259752	0.29099	4.03592e-05	49555	10x	tenx_B73	B73	NA	-0.990084	1.53091	0.105769	singlet	5	Ground_meristem
CB:Z:CAACCAATCCGAATTG-pool21	6918	1836	1805	0	4020	3.60423	0.265395	0.260914	0	6918	10x	tenx_B73	B73	NA	-1.74752	5.05761	0.1	singlet	9	Vascular_parenchyma_precursor
CB:Z:CTCAGAACACCGTTGG-pool21	19061	5420	7055	0	9878	3.99467	0.28435	0.370127	0	19061	10x	tenx_B73	B73	NA	2.38699	0.0813453	0.146154	singlet	11	Mesophyll
CB:Z:TACAGCAAGAAACGCC-pool21	16312	3618	4389	0	8911	3.94993	0.2218	0.269066	0	16312	10x	tenx_B73	B73	NA	1.10399	0.314647	0.136538	singlet	5	Ground_meristem
CB:Z:GCATTGAAGCGAGCTA-pool21	1872	514	707	0	1075	3.03141	0.274573	0.377671	0	1872	10x	tenx_B73	B73	NA	1.96945	4.0638	0.0865385	singlet	1	Protoderm
CB:Z:AATGCCAAGCTCGGCT-pool21	10005	3728	4971	2	5755	3.76005	0.372614	0.496852	0.0001999	10005	10x	tenx_B73	B73	NA	2.24601	5.73053	0.123077	singlet	3	Axillary_meristem
CB:Z:CAGCTAATCGATCTTT-pool21	3165	1017	1394	0	1644	3.2159	0.321327	0.440442	0	3165	10x	tenx_B73	B73	NA	-1.65478	5.52391	0.121154	singlet	9	Vascular_parenchyma_precursor
CB:Z:ACAGGCCCATGCGTTA-pool21	2432	773	844	0	1421	3.15259	0.317845	0.347039	0	2432	10x	tenx_B73	B73	NA	1.59493	4.53276	0.0557692	singlet	3	Axillary_meristem
CB:Z:CTGTTCGCACACACCG-pool21	1426	403	400	0	840	2.92428	0.282609	0.280505	0	1426	10x	tenx_B73	B73	NA	-0.472417	0.45924	0.0653846	singlet	1	Protoderm
CB:Z:CAGGATTCACATCATG-pool21	4214	1498	1909	0	2316	3.36474	0.355482	0.453014	0	4214	10x	tenx_B73	B73	NA	3.15798	-0.265881	0.0903846	singlet	11	Mesophyll
CB:Z:GCTTGCTGTGTCTACA-pool21	5318	1858	2530	0	3029	3.4813	0.349379	0.475743	0	5318	10x	tenx_B73	B73	NA	-2.51536	-0.157621	0.136538	singlet	12	Epidermis
CB:Z:GAGACTTGTGAATCAA-pool21	4360	1412	1788	0	2507	3.39915	0.323853	0.410092	0	4360	10x	tenx_B73	B73	NA	2.12796	4.73731	0.0865385	singlet	3	Axillary_meristem
CB:Z:GCTGTTCCATGGGTGA-pool21	1384	539	758	0	759	2.88024	0.389451	0.547688	0	1384	10x	tenx_B73	B73	NA	3.00666	-0.475778	0.0788462	singlet	11	Mesophyll
CB:Z:AGCTATGCAAGTCCTA-pool21	17241	4063	4782	2	9221	3.96478	0.235659	0.277362	0.000116003	17241	10x	tenx_B73	B73	NA	0.877863	0.237099	0.121154	singlet	5	Ground_meristem
CB:Z:GGAACCCAGGCACTAG-pool21	7359	2160	2818	0	3955	3.59715	0.293518	0.382932	0	7359	10x	tenx_B73	B73	NA	2.81846	-0.359952	0.0769231	singlet	11	Mesophyll
CB:Z:GTGTCAAAGGCTCCTG-pool21	1004	341	414	0	551	2.74115	0.339641	0.412351	0	1004	10x	tenx_B73	B73	NA	4.40969	-0.366229	0.0769231	singlet	13	Bundle_sheath
CB:Z:TGATGCATCGCGCCAA-pool21	21967	6016	8366	6	11310	4.05346	0.273865	0.380844	0.000273137	21967	10x	tenx_B73	B73	NA	1.07715	0.079952	0.180769	singlet	5	Ground_meristem
CB:Z:ACAAAGAAGGCAGTAC-pool21	17577	3747	3977	0	9364	3.97146	0.213176	0.226262	0	17577	10x	tenx_B73	B73	NA	0.971891	0.659739	0.134615	singlet	5	Ground_meristem
CB:Z:CGTACAATCCAGTTAG-pool21	3790	1132	1157	0	2246	3.35141	0.298681	0.305277	0	3790	10x	tenx_B73	B73	NA	2.81819	-0.00948799	0.0961538	singlet	11	Mesophyll
CB:Z:GCTTTCGGTTCCCTTG-pool21	9244	3724	5683	0	4821	3.68314	0.402856	0.614777	0	9244	10x	tenx_B73	B73	NA	3.01519	-0.407313	0.101923	singlet	11	Mesophyll
CB:Z:AACTTGGAGTGAGCTG-pool21	1964	428	427	0	1101	3.04179	0.217923	0.217413	0	1964	10x	tenx_B73	B73	NA	1.11167	0.564372	0.0846154	singlet	5	Ground_meristem
CB:Z:TCAAAGCCACCAAGGA-pool21	2079	688	815	0	1050	3.02119	0.330928	0.392015	0	2079	10x	tenx_B73	B73	NA	3.20062	-0.306076	0.0538462	singlet	11	Mesophyll
CB:Z:AATGTCGGTATTTGCG-pool21	1063	254	331	0	618	2.79099	0.238946	0.311383	0	1063	10x	tenx_B73	B73	NA	-1.02928	5.07971	0.0884615	singlet	9	Vascular_parenchyma_precursor
CB:Z:AATGTCGGTCAACTGT-pool21	4377	1937	2592	0	2263	3.35468	0.442541	0.592186	0	4377	10x	tenx_B73	B73	NA	-1.5725	5.71172	0.0788462	singlet	9	Vascular_parenchyma_precursor
CB:Z:GTCACAAGTCAACTGT-pool21	4844	2031	2584	0	2524	3.40209	0.419282	0.533443	0	4844	10x	tenx_B73	B73	NA	-1.58381	5.72644	0.0596154	singlet	9	Vascular_parenchyma_precursor
CB:Z:TTCTAACCATTGCGAT-pool21	3495	1527	2116	0	1850	3.26717	0.43691	0.605436	0	3495	10x	tenx_B73	B73	NA	-1.57907	5.69229	0.075	singlet	9	Vascular_parenchyma_precursor
CB:Z:CAGCCTTAGTCCGGAA-pool21	32409	9788	11751	2	17253	4.23686	0.302015	0.362584	6.17113e-05	32409	10x	tenx_B73	B73	NA	0.790914	-0.120865	0.142308	singlet	5	Ground_meristem
CB:Z:CTCTAGCTCCGGGCAT-pool21	5741	1698	2097	0	3271	3.51468	0.295767	0.365267	0	5741	10x	tenx_B73	B73	NA	2.07083	5.06959	0.105769	singlet	3	Axillary_meristem
CB:Z:CGGACTGTCGCTATTT-pool21	3582	1089	1116	0	2065	3.31492	0.30402	0.311558	0	3582	10x	tenx_B73	B73	NA	2.46877	0.0728386	0.0615385	singlet	11	Mesophyll
CB:Z:GCTGCGAGTGAATACA-pool21	11660	3549	4432	0	6023	3.77981	0.304374	0.380103	0	11660	10x	tenx_B73	B73	NA	2.98721	0.000466555	0.119231	singlet	11	Mesophyll
CB:Z:TGCCTGTGTTAGTAGA-pool21	6613	1674	2156	0	3563	3.55182	0.253138	0.326024	0	6613	10x	tenx_B73	B73	NA	1.03303	0.357923	0.103846	singlet	5	Ground_meristem
CB:Z:AAGGAGCCAGTGCGTC-pool21	2192	531	665	2	1371	3.13704	0.242245	0.303376	0.000912409	2192	10x	tenx_B73	B73	NA	1.91111	-2.61367	0.101923	singlet	2	Bundle_sheath
CB:Z:TGTAGCACAAGGTTCT-pool21	1274	301	336	0	728	2.86213	0.236264	0.263736	0	1274	10x	tenx_B73	B73	NA	4.82962	-1.94748	0.109615	singlet	13	Bundle_sheath
CB:Z:AAATGAGCATGGTAAA-pool21	7401	2401	3030	0	4299	3.63337	0.324416	0.409404	0	7401	10x	tenx_B73	B73	NA	1.94581	4.92361	0.0673077	singlet	3	Axillary_meristem
CB:Z:GATCGTAAGCTGAATA-pool21	3134	990	1158	0	1815	3.25888	0.31589	0.369496	0	3134	10x	tenx_B73	B73	NA	1.8175	4.29785	0.0403846	singlet	3	Axillary_meristem
CB:Z:ATGTACGAGGGTAATT-pool21	7488	2295	2771	0	4319	3.63538	0.30649	0.370059	0	7488	10x	tenx_B73	B73	NA	2.16181	4.37519	0.0307692	singlet	3	Axillary_meristem
CB:Z:TGGCGCAGTACGGATG-pool21	1207	426	497	0	662	2.82086	0.352941	0.411765	0	1207	10x	tenx_B73	B73	NA	-2.26897	-1.84562	0.105769	singlet	4	Ground_meristem
CB:Z:TACCCTGCAGCGTGAA-pool21	20781	5153	5998	0	11815	4.07243	0.247967	0.288629	0	20781	10x	tenx_B73	B73	NA	0.92833	0.181361	0.186538	singlet	5	Ground_meristem
CB:Z:TTTGGTTCATAGTCCA-pool21	10565	3622	4754	2	6108	3.7859	0.34283	0.449976	0.000189304	10565	10x	tenx_B73	B73	NA	2.25818	5.8081	0.159615	singlet	3	Axillary_meristem
CB:Z:CCTGCTAAGGTCTTTG-pool21	12158	3056	3945	4	6472	3.81104	0.251357	0.324478	0.000329001	12158	10x	tenx_B73	B73	NA	1.97133	-0.801553	0.125	singlet	11	Mesophyll
CB:Z:GTAATCGCAAGCGAAC-pool21	4257	1870	2773	0	2317	3.36493	0.439276	0.651398	0	4257	10x	tenx_B73	B73	NA	2.18991	2.02791	0.1	singlet	9	Vascular_parenchyma_precursor
CB:Z:CCCTAACAGAACTAAC-pool21	22456	4995	6604	0	11976	4.07831	0.222435	0.294086	0	22456	10x	tenx_B73	B73	NA	2.85339	-1.73655	0.107692	singlet	2	Bundle_sheath
CB:Z:TACCTATGTGATCAGG-pool21	16606	4660	6288	0	8466	3.92768	0.280621	0.378658	0	16606	10x	tenx_B73	B73	NA	-1.50735	-5.12237	0.0923077	singlet	14	Procabium
CB:Z:GGTTGCGAGGATCCTT-pool21	38952	14155	16526	0	19717	4.29484	0.363396	0.424266	0	38952	10x	tenx_B73	B73	NA	-1.93958	5.22293	0.167308	singlet	9	Vascular_parenchyma_precursor
CB:Z:GCAGATTGTCAACTAC-pool21	2843	662	1152	2	1494	3.17435	0.232853	0.405206	0.000703482	2843	10x	tenx_B73	B73	NA	1.19616	0.598607	0.192308	singlet	5	Ground_meristem
CB:Z:CCTGCTAGTGTTTCTT-pool21	1269	375	486	0	724	2.85974	0.295508	0.382979	0	1269	10x	tenx_B73	B73	NA	-2.31682	3.26933	0.0788462	singlet	12	Epidermis
CB:Z:TTTGGCCTCGCACCGA-pool21	1353	375	446	0	781	2.89265	0.277162	0.329638	0	1353	10x	tenx_B73	B73	NA	-2.25887	3.03829	0.0903846	singlet	12	Epidermis
CB:Z:TTGGTCCTCGAGCGCT-pool21	1146	237	289	0	643	2.80821	0.206806	0.252182	0	1146	10x	tenx_B73	B73	NA	1.1483	0.570174	0.101923	singlet	5	Ground_meristem
CB:Z:GGTGCTGGTCAATACC-pool21	6129	2065	2932	0	3270	3.51455	0.336923	0.478381	0	6129	10x	tenx_B73	B73	NA	1.12541	-1.18905	0.1	singlet	7	Ground_meristem
CB:Z:AAGGTTCGTCGATTAC-pool21	23481	6420	7941	0	12360	4.09202	0.273413	0.338188	0	23481	10x	tenx_B73	B73	NA	4.61528	-1.98403	0.157692	singlet	13	Bundle_sheath
CB:Z:TTACGTTTCTATATCC-pool21	10604	3960	5204	0	6200	3.79239	0.373444	0.490758	0	10604	10x	tenx_B73	B73	NA	2.29301	5.6562	0.148077	singlet	3	Axillary_meristem
CB:Z:AGCTGGCCAGCAACAG-pool21	4618	1452	1960	0	2469	3.39252	0.314422	0.424426	0	4618	10x	tenx_B73	B73	NA	3.27712	2.26496	0.0769231	singlet	6	Vascular_parenchyma
CB:Z:TACGCAAGTTTCGATG-pool21	26422	7282	9079	0	13866	4.14195	0.275604	0.343615	0	26422	10x	tenx_B73	B73	NA	4.15674	-0.80536	0.140385	singlet	5	Ground_meristem
CB:Z:TCAAAGCCACAACGGA-pool21	2249	688	902	0	1272	3.10449	0.305914	0.401067	0	2249	10x	tenx_B73	B73	NA	2.47022	-0.861033	0.0653846	singlet	11	Mesophyll
CB:Z:CAACGTAAGTTGACAA-pool21	2511	510	516	0	1411	3.14953	0.203106	0.205496	0	2511	10x	tenx_B73	B73	NA	0.212203	0.974952	0.0980769	singlet	5	Ground_meristem
CB:Z:GGGTCTGAGAACGCCA-pool21	7194	2373	3160	0	3768	3.57611	0.329858	0.439255	0	7194	10x	tenx_B73	B73	NA	2.89577	-0.129795	0.0730769	singlet	11	Mesophyll
CB:Z:ACCGAATAGGTACTCT-pool21	8679	2222	3148	0	4607	3.66342	0.25602	0.362715	0	8679	10x	tenx_B73	B73	NA	1.06971	-0.889828	0.117308	singlet	5	Ground_meristem
CB:Z:CAGCTAAAGTTCGCGC-pool21	21990	7561	9312	0	11293	4.05281	0.343838	0.423465	0	21990	10x	tenx_B73	B73	NA	4.73611	-1.66629	0.0923077	singlet	13	Bundle_sheath
CB:Z:TAGGAGGGTGCGACCT-pool21	56301	18578	24821	0	27526	4.43974	0.329976	0.440863	0	56301	10x	tenx_B73	B73	NA	0.818631	0.715012	0.192308	singlet	5	Ground_meristem
CB:Z:TACAGCATCTGTGTCC-pool21	14161	3648	4691	0	7528	3.87668	0.257609	0.331262	0	14161	10x	tenx_B73	B73	NA	1.00575	0.260017	0.121154	singlet	5	Ground_meristem
CB:Z:AACTTGGGTTAGGCTT-pool21	23690	5852	7664	6	12454	4.09531	0.247024	0.323512	0.000253271	23690	10x	tenx_B73	B73	NA	1.88437	0.177687	0.130769	singlet	11	Mesophyll
CB:Z:GATTAGCGTGTGTGTT-pool21	4755	1674	1945	0	2609	3.41647	0.35205	0.409043	0	4755	10x	tenx_B73	B73	NA	2.66488	-0.620827	0.0865385	singlet	11	Mesophyll
CB:Z:TCACCACCATCCCTTG-pool21	15748	5608	8090	0	7928	3.89916	0.356109	0.513716	0	15748	10x	tenx_B73	B73	NA	-1.91876	4.9188	0.151923	singlet	9	Vascular_parenchyma_precursor
CB:Z:CATGTTTGTCATCGTA-pool21	17054	5157	6790	0	8510	3.92993	0.302392	0.398147	0	17054	10x	tenx_B73	B73	NA	-1.25998	5.18002	0.121154	singlet	9	Vascular_parenchyma_precursor
CB:Z:GGCATTAGTGCTTCCT-pool21	1428	502	616	0	841	2.9248	0.351541	0.431373	0	1428	10x	tenx_B73	B73	NA	3.11155	-0.470186	0.075	singlet	11	Mesophyll
CB:Z:AACGAGGTCGGATAAA-pool21	2288	649	678	0	1323	3.12156	0.283654	0.296329	0	2288	10x	tenx_B73	B73	NA	-2.46981	-4.36505	0.103846	singlet	1	Protoderm
CB:Z:AGATTCGAGACTTCCA-pool21	2675	782	970	0	1575	3.19728	0.292336	0.362617	0	2675	10x	tenx_B73	B73	NA	1.85666	4.66947	0.0576923	singlet	3	Axillary_meristem
[truncated: 96,427 more rows]

## Sheet: Table S4
Table S4: Meta data for multiplexed scifi-ATAC-seq with 8 samples
cellID	total	tss	acrs	ptmt	nSites	log10nSites	pTSS	FRiP	pOrg	unique	bayes.type	droplet_bc	tn5A_bc	tn5B_bc	genotype	umap1	umap2	doubletscore	d.type	LouvainClusters	Cell_type	library
BC:Z:CCTGGGAGTACAACGGGGAATCGAGG-Xuan_Zm_8_geno_scifi-merged	3135	1585	2723	0	1892	3.27692	0.505582	0.868581	0	3135	Singlet	CCTGGGAGTACAACGG	GGAAT	CGAGG	OH7B	-1.91101	4.66689	0.0511278	singlet	1	Bundle_sheath	OH7B
BC:Z:CCTGGGAGTACAACGGGGAATGTTTC-Xuan_Zm_8_geno_scifi-merged	5678	2714	4834	0	3447	3.53744	0.477985	0.851356	0	5678	Singlet	CCTGGGAGTACAACGG	GGAAT	GTTTC	B97	4.12306	-2.83602	0.109774	singlet	9	Guard_cell_precursor	B97
BC:Z:CACAGATGTCTCTAAGTATACAGCTT-Xuan_Zm_8_geno_scifi-merged	1150	564	921	0	713	2.85309	0.490435	0.80087	0	1150	Singlet	CACAGATGTCTCTAAG	TATAC	AGCTT	B73	-3.13024	1.36828	0.0496241	singlet	2	Bundle_sheath	B73_rep2
BC:Z:ATGTTTCGTTTCGATGTATACTCGGA-Xuan_Zm_8_geno_scifi-merged	10078	4526	7570	2	5865	3.76827	0.449097	0.751141	0.000198452	10078	Singlet	ATGTTTCGTTTCGATG	TATAC	TCGGA	B73	-2.6998	1.5875	0.0902256	singlet	2	Bundle_sheath	B73_rep1
BC:Z:GATGGCCAGGGTCCCTTATACTCGGA-Xuan_Zm_8_geno_scifi-merged	1205	533	956	0	743	2.87099	0.442324	0.793361	0	1205	Singlet	GATGGCCAGGGTCCCT	TATAC	TCGGA	B73	3.1094	2.6615	0.0466165	singlet	12	Vascular_parenchyma_precursor	B73_rep1
BC:Z:ATTTGTCTCTGCTACCTCGCTGTTTC-Xuan_Zm_8_geno_scifi-merged	1818	899	1536	0	1106	3.04376	0.494499	0.844884	0	1818	Singlet	ATTTGTCTCTGCTACC	TCGCT	GTTTC	B97	-2.46532	2.43887	0.102256	singlet	2	Bundle_sheath	B97
BC:Z:GTCACCTTCTAGTCGACTTAGGCTCC-Xuan_Zm_8_geno_scifi-merged	3482	1647	2681	0	2133	3.32899	0.473004	0.76996	0	3482	Singlet	GTCACCTTCTAGTCGA	CTTAG	GCTCC	Mo18W	3.36804	-0.132066	0.0451128	singlet	3	Vascular_parenchyma_precursor	Mo18W
BC:Z:AGCCCGACATGGAGGTCTTAGGTTTC-Xuan_Zm_8_geno_scifi-merged	8226	4046	6758	0	4869	3.68744	0.491855	0.821541	0	8226	Singlet	AGCCCGACATGGAGGT	CTTAG	GTTTC	B97	-0.389266	0.148829	0.0676692	singlet	3	Vascular_parenchyma_precursor	B97
BC:Z:CCACGTTAGATCGCCCCGACATCGGA-Xuan_Zm_8_geno_scifi-merged	1178	575	944	0	718	2.85612	0.488115	0.801358	0	1178	Singlet	CCACGTTAGATCGCCC	CGACA	TCGGA	B73	-3.21291	2.09843	0.0556391	singlet	2	Bundle_sheath	B73_rep1
BC:Z:GATCGTAGTCCAAGAGAATTGTCGGA-Xuan_Zm_8_geno_scifi-merged	65093	27993	42066	0	34429	4.53692	0.430046	0.646245	0	65093	Singlet	GATCGTAGTCCAAGAG	AATTG	TCGGA	B73	1.20946	2.43973	0.075188	singlet	6	Vascular_parenchyma	B73_rep1
BC:Z:CACCTGTAGCAGAGCTCGCGATCGGA-Xuan_Zm_8_geno_scifi-merged	1355	634	1095	0	844	2.92634	0.467897	0.808118	0	1355	Singlet	CACCTGTAGCAGAGCT	CGCGA	TCGGA	B73	-1.43444	2.39001	0.037594	singlet	16	Procabium_phloem_precursor	B73_rep1
BC:Z:AAGGTTCCATCCTGGGCTTAGTCGGA-Xuan_Zm_8_geno_scifi-merged	2785	1269	2037	0	1693	3.22866	0.455655	0.731418	0	2785	Singlet	AAGGTTCCATCCTGGG	CTTAG	TCGGA	B73	-1.26251	-0.135061	0.0526316	singlet	3	Vascular_parenchyma_precursor	B73_rep1
BC:Z:TCAAGCACAACGTCGCTATACTCATT-Xuan_Zm_8_geno_scifi-merged	4502	2117	3464	0	2723	3.43505	0.470235	0.769436	0	4502	Singlet	TCAAGCACAACGTCGC	TATAC	TCATT	M162W	-2.13078	1.03316	0.0827068	singlet	3	Vascular_parenchyma_precursor	M162W
BC:Z:TAAACCGGTCAACTGTCTTAGGTTTC-Xuan_Zm_8_geno_scifi-merged	1264	557	823	0	775	2.8893	0.440665	0.651108	0	1264	Singlet	TAAACCGGTCAACTGT	CTTAG	GTTTC	B97	1.48824	2.28377	0.0616541	singlet	6	Vascular_parenchyma	B97
BC:Z:GAGCGCTAGTTCTCCCCGTATGTTTC-Xuan_Zm_8_geno_scifi-merged	4611	2244	3702	0	2775	3.44326	0.486662	0.802863	0	4611	Singlet	GAGCGCTAGTTCTCCC	CGTAT	GTTTC	B97	-1.89237	1.62416	0.0962406	singlet	16	Procabium_phloem_precursor	B97
BC:Z:CATTCCGTCCTGTGGGTATACACCGG-Xuan_Zm_8_geno_scifi-merged	2879	1348	2195	2	1732	3.23855	0.468218	0.762418	0.000694686	2879	Singlet	CATTCCGTCCTGTGGG	TATAC	ACCGG	Tzi8	-4.65901	-1.40802	0.043609	singlet	11	Ground_meristem	Tzi8
BC:Z:AAATGCCTCAAGGCAGTATACTCGGA-Xuan_Zm_8_geno_scifi-merged	3413	1517	2524	0	2069	3.31576	0.444477	0.739525	0	3413	Singlet	AAATGCCTCAAGGCAG	TATAC	TCGGA	B73	4.77771	0.55044	0.0526316	singlet	13	Vascular_parenchyma_precursor	B73_rep1
BC:Z:CCATACCTCCGGAAAGCGTATTCATT-Xuan_Zm_8_geno_scifi-merged	1443	687	1225	0	894	2.95134	0.476091	0.848926	0	1443	Singlet	CCATACCTCCGGAAAG	CGTAT	TCATT	M162W	-0.517501	1.36221	0.0676692	singlet	7	Xylem	M162W
BC:Z:CCCGTTAGTCACATTGAAGTCTCATT-Xuan_Zm_8_geno_scifi-merged	1464	674	1122	0	894	2.95134	0.460383	0.766393	0	1464	Singlet	CCCGTTAGTCACATTG	AAGTC	TCATT	M162W	-0.750165	2.28254	0.0706767	singlet	16	Procabium_phloem_precursor	M162W
BC:Z:AATACGCGTTTAAGCCTCGCTGTTTC-Xuan_Zm_8_geno_scifi-merged	3272	1572	2625	0	1946	3.28914	0.48044	0.802262	0	3272	Singlet	AATACGCGTTTAAGCC	TCGCT	GTTTC	B97	-4.43652	-1.72705	0.0496241	singlet	11	Ground_meristem	B97
BC:Z:CTGGGACGTGCTGTCGCGCGAACCGG-Xuan_Zm_8_geno_scifi-merged	1225	567	961	0	763	2.88252	0.462857	0.78449	0	1225	Singlet	CTGGGACGTGCTGTCG	CGCGA	ACCGG	Tzi8	-3.18595	0.904332	0.0977444	singlet	3	Vascular_parenchyma_precursor	Tzi8
BC:Z:ACGTGGCGTCGTAATCGGAATACTAA-Xuan_Zm_8_geno_scifi-merged	4007	1865	3182	0	2402	3.38057	0.465435	0.79411	0	4007	Singlet	ACGTGGCGTCGTAATC	GGAAT	ACTAA	Ky21	-0.0344904	-0.974866	0.109774	singlet	5	Axillary_meristem	Ky21
BC:Z:TACGGATCACAGTTCAAGTAAACCGG-Xuan_Zm_8_geno_scifi-merged	2062	974	1575	0	1250	3.09691	0.472357	0.763822	0	2062	Singlet	TACGGATCACAGTTCA	AGTAA	ACCGG	Tzi8	-1.83324	-0.0354974	0.0781955	singlet	14	Axillary_meristem	Tzi8
BC:Z:TCACAGACAAACTACCTCGCTGCTCC-Xuan_Zm_8_geno_scifi-merged	2667	1308	2186	0	1653	3.21827	0.490439	0.819648	0	2667	Singlet	TCACAGACAAACTACC	TCGCT	GCTCC	Mo18W	-0.426531	-0.154738	0.0541353	singlet	3	Vascular_parenchyma_precursor	Mo18W
BC:Z:TGCCTCAGTTCCCTTGCTTAGGTTTC-Xuan_Zm_8_geno_scifi-merged	1334	644	1149	0	813	2.91009	0.482759	0.861319	0	1334	Singlet	TGCCTCAGTTCCCTTG	CTTAG	GTTTC	B97	-2.54431	1.35997	0.0691729	singlet	2	Bundle_sheath	B97
BC:Z:CAGCTAAAGGCAAGGGCTTAGGCTCC-Xuan_Zm_8_geno_scifi-merged	2832	1355	2385	0	1711	3.23325	0.47846	0.842161	0	2832	Singlet	CAGCTAAAGGCAAGGG	CTTAG	GCTCC	Mo18W	2.02219	1.59531	0.0541353	singlet	3	Vascular_parenchyma_precursor	Mo18W
BC:Z:GGATGAGAGGCACTAGCTTAGGTTTC-Xuan_Zm_8_geno_scifi-merged	5819	2613	4028	0	3548	3.54998	0.449046	0.692215	0	5819	Singlet	GGATGAGAGGCACTAG	CTTAG	GTTTC	B97	3.54529	2.02145	0.0947368	singlet	3	Vascular_parenchyma_precursor	B97
BC:Z:CTTGAAGCAACGTACTCTTAGTCGGA-Xuan_Zm_8_geno_scifi-merged	8334	3614	5736	0	4960	3.69548	0.433645	0.688265	0	8334	Singlet	CTTGAAGCAACGTACT	CTTAG	TCGGA	B73	-2.30914	4.07862	0.0556391	singlet	1	Bundle_sheath	B73_rep1
BC:Z:ACCGCAGCACGCCGATTATACTCGGA-Xuan_Zm_8_geno_scifi-merged	1032	443	761	0	624	2.79518	0.429264	0.737403	0	1032	Singlet	ACCGCAGCACGCCGAT	TATAC	TCGGA	B73	-0.461541	-3.04248	0.0406015	singlet	9	Guard_cell_precursor	B73_rep1
BC:Z:TAATTCCAGAGCCTGATCGCTTCGGA-Xuan_Zm_8_geno_scifi-merged	12993	6212	10907	0	7610	3.88138	0.478104	0.839452	0	12993	Singlet	TAATTCCAGAGCCTGA	TCGCT	TCGGA	B73	3.8545	-2.31382	0.0902256	singlet	4	Vascular_parenchyma_precursor	B73_rep1
BC:Z:TACTGCCGTTTCTTACACTACTCATT-Xuan_Zm_8_geno_scifi-merged	4132	1977	3240	0	2496	3.39724	0.478461	0.784124	0	4132	Singlet	TACTGCCGTTTCTTAC	ACTAC	TCATT	M162W	4.38366	0.578092	0.0962406	singlet	3	Vascular_parenchyma_precursor	M162W
BC:Z:AACAAAGCATCAGCTACGACAGCTCC-Xuan_Zm_8_geno_scifi-merged	4361	1961	3563	0	2643	3.4221	0.449668	0.817014	0	4361	Singlet	AACAAAGCATCAGCTA	CGACA	GCTCC	Mo18W	4.83798	-0.275888	0.0661654	singlet	13	Vascular_parenchyma_precursor	Mo18W
BC:Z:ACAAAGACAAGTTGCTCGACATCGGA-Xuan_Zm_8_geno_scifi-merged	3814	1893	3152	0	2285	3.35889	0.496329	0.826429	0	3814	Singlet	ACAAAGACAAGTTGCT	CGACA	TCGGA	B73	3.76361	-3.5813	0.0736842	singlet	10	Epidermis	B73_rep1
BC:Z:ACCTGCTTCAACGTGTGGAATACCGG-Xuan_Zm_8_geno_scifi-merged	5162	2423	3939	0	3074	3.4877	0.469392	0.763076	0	5162	Singlet	ACCTGCTTCAACGTGT	GGAAT	ACCGG	Tzi8	-2.78679	2.25912	0.0766917	singlet	3	Vascular_parenchyma_precursor	Tzi8
BC:Z:ATAGTCGCACTGAAGGCGTATACTAA-Xuan_Zm_8_geno_scifi-merged	4673	2254	4003	0	2837	3.45286	0.482345	0.856623	0	4673	Singlet	ATAGTCGCACTGAAGG	CGTAT	ACTAA	Ky21	4.45052	1.52626	0.0646617	singlet	12	Vascular_parenchyma_precursor	Ky21
BC:Z:ATCCCTGTCATGAACCTCGCTGCTCC-Xuan_Zm_8_geno_scifi-merged	3326	1528	2568	0	2026	3.30664	0.459411	0.772099	0	3326	Singlet	ATCCCTGTCATGAACC	TCGCT	GCTCC	Mo18W	3.91815	-3.34181	0.0541353	singlet	10	Epidermis	Mo18W
BC:Z:CACAACAAGCAGGACTCGACAACCGG-Xuan_Zm_8_geno_scifi-merged	3153	1524	2636	0	1888	3.276	0.483349	0.836029	0	3153	Singlet	CACAACAAGCAGGACT	CGACA	ACCGG	Tzi8	-0.490352	-2.83762	0.0706767	singlet	9	Guard_cell_precursor	Tzi8
BC:Z:CGCAATATCTATTGTCTCGCTACCGG-Xuan_Zm_8_geno_scifi-merged	5780	2630	4442	0	3494	3.54332	0.455017	0.768512	0	5780	Singlet	CGCAATATCTATTGTC	TCGCT	ACCGG	Tzi8	3.92207	0.331173	0.0676692	singlet	3	Vascular_parenchyma_precursor	Tzi8
BC:Z:CTAGGATAGTCCAGAGAATTGTCATT-Xuan_Zm_8_geno_scifi-merged	2051	981	1627	0	1248	3.09621	0.478303	0.793272	0	2051	Singlet	CTAGGATAGTCCAGAG	AATTG	TCATT	M162W	-2.9527	-1.22511	0.0842105	singlet	11	Ground_meristem	M162W
BC:Z:GAACTTGCAAGTGGCAAAGTCTCATT-Xuan_Zm_8_geno_scifi-merged	1566	718	1236	0	964	2.98408	0.458493	0.789272	0	1566	Singlet	GAACTTGCAAGTGGCA	AAGTC	TCATT	M162W	0.902025	-2.93335	0.0676692	singlet	9	Guard_cell_precursor	M162W
BC:Z:GATGGCCGTTCACGTAGGAATACTAA-Xuan_Zm_8_geno_scifi-merged	23802	11481	19320	0	13422	4.12782	0.482354	0.811696	0	23802	Singlet	GATGGCCGTTCACGTA	GGAAT	ACTAA	Ky21	2.84477	0.0139131	0.075188	singlet	3	Vascular_parenchyma_precursor	Ky21
BC:Z:GCACCTTTCTAAACGCACTACACTAA-Xuan_Zm_8_geno_scifi-merged	18297	8678	15324	0	10470	4.01995	0.474285	0.837514	0	18297	Singlet	GCACCTTTCTAAACGC	ACTAC	ACTAA	Ky21	2.58193	0.143036	0.0857143	singlet	3	Vascular_parenchyma_precursor	Ky21
BC:Z:GCTCACTTCAGCCGGTTATACTCATT-Xuan_Zm_8_geno_scifi-merged	4904	2318	4026	0	2985	3.47494	0.472675	0.820962	0	4904	Singlet	GCTCACTTCAGCCGGT	TATAC	TCATT	M162W	3.2848	-1.3688	0.0721805	singlet	15	Protoderm	M162W
BC:Z:GCTCGAGCACTGTAACTATACTCGGA-Xuan_Zm_8_geno_scifi-merged	1730	804	1319	0	1079	3.03302	0.46474	0.762428	0	1730	Singlet	GCTCGAGCACTGTAAC	TATAC	TCGGA	B73	3.52247	2.47804	0.0661654	singlet	12	Vascular_parenchyma_precursor	B73_rep1
BC:Z:GGAGTAGTCAACACGTTATACACTAA-Xuan_Zm_8_geno_scifi-merged	7749	3738	6314	0	4636	3.66614	0.482385	0.814815	0	7749	Singlet	GGAGTAGTCAACACGT	TATAC	ACTAA	Ky21	5.31647	-1.26349	0.0827068	singlet	13	Vascular_parenchyma_precursor	Ky21
BC:Z:GGGCCATCACAGCCACACTACGTTTC-Xuan_Zm_8_geno_scifi-merged	1219	666	1045	0	736	2.86688	0.546349	0.85726	0	1219	Singlet	GGGCCATCACAGCCAC	ACTAC	GTTTC	B97	3.01402	-2.16771	0.0586466	singlet	4	Vascular_parenchyma_precursor	B97
BC:Z:GGTAGGAAGTTAGCAAACTACGTTTC-Xuan_Zm_8_geno_scifi-merged	2122	1075	1778	0	1256	3.09899	0.506598	0.837889	0	2122	Singlet	GGTAGGAAGTTAGCAA	ACTAC	GTTTC	B97	-1.71562	-1.70492	0.0766917	singlet	5	Axillary_meristem	B97
BC:Z:GGTAGGATCCGTGCAGGGAATGTTTC-Xuan_Zm_8_geno_scifi-merged	6675	3276	5189	0	3989	3.60086	0.490787	0.777378	0	6675	Singlet	GGTAGGATCCGTGCAG	GGAAT	GTTTC	B97	-1.04544	-2.83322	0.0511278	singlet	9	Guard_cell_precursor	B97
BC:Z:GGTGCTGCAGTAGGCAACTACGTTTC-Xuan_Zm_8_geno_scifi-merged	1839	948	1610	0	1114	3.04689	0.515498	0.875476	0	1839	Singlet	GGTGCTGCAGTAGGCA	ACTAC	GTTTC	B97	-2.9861	3.35778	0.0676692	singlet	1	Bundle_sheath	B97
BC:Z:TACATGGCACTCCTCACGTATGTTTC-Xuan_Zm_8_geno_scifi-merged	1774	805	1301	0	1091	3.03782	0.453777	0.733371	0	1774	Singlet	TACATGGCACTCCTCA	CGTAT	GTTTC	B97	0.966933	2.28666	0.100752	singlet	6	Vascular_parenchyma	B97
BC:Z:TACGCCTCAGAGAGAAAGTAAACCGG-Xuan_Zm_8_geno_scifi-merged	2685	1301	2272	0	1649	3.21722	0.484544	0.846182	0	2685	Singlet	TACGCCTCAGAGAGAA	AGTAA	ACCGG	Tzi8	4.02735	-3.11962	0.0300752	singlet	10	Epidermis	Tzi8
BC:Z:TCAGTCCGTTTGCCAACTTAGTCATT-Xuan_Zm_8_geno_scifi-merged	2434	1132	2091	0	1496	3.17493	0.465078	0.85908	0	2434	Singlet	TCAGTCCGTTTGCCAA	CTTAG	TCATT	M162W	-5.05782	-3.2786	0.0390977	singlet	8	Mesophyll	M162W
BC:Z:TCCATCGCATGTGGGAGGAATGTTTC-Xuan_Zm_8_geno_scifi-merged	2474	1213	2095	0	1514	3.18013	0.490299	0.846807	0	2474	Singlet	TCCATCGCATGTGGGA	GGAAT	GTTTC	B97	3.2502	2.50358	0.0646617	singlet	3	Vascular_parenchyma_precursor	B97
BC:Z:TCGCAGGGTAAGCCTTAAGTCACCGG-Xuan_Zm_8_geno_scifi-merged	2341	1072	1868	0	1457	3.16346	0.457924	0.79795	0	2341	Singlet	TCGCAGGGTAAGCCTT	AAGTC	ACCGG	Tzi8	-1.25864	0.0998783	0.0917293	singlet	3	Vascular_parenchyma_precursor	Tzi8
BC:Z:TTATGTCTCGCGCCAACGTATGTTTC-Xuan_Zm_8_geno_scifi-merged	2928	1378	2513	0	1777	3.24969	0.470628	0.858265	0	2928	Singlet	TTATGTCTCGCGCCAA	CGTAT	GTTTC	B97	-2.37923	4.1599	0.0947368	singlet	1	Bundle_sheath	B97
BC:Z:TTCGTTAGTCAACTGTTCGCTACTAA-Xuan_Zm_8_geno_scifi-merged	12116	5924	10529	0	7095	3.85095	0.48894	0.869016	0	12116	Singlet	TTCGTTAGTCAACTGT	TCGCT	ACTAA	Ky21	3.31458	0.0535133	0.0736842	singlet	3	Vascular_parenchyma_precursor	Ky21
BC:Z:TTGTTCATCGCTATAGAAGTCTCATT-Xuan_Zm_8_geno_scifi-merged	1363	669	962	0	806	2.90634	0.490829	0.705796	0	1363	Singlet	TTGTTCATCGCTATAG	AAGTC	TCATT	M162W	-1.05039	-2.86136	0.0541353	singlet	9	Guard_cell_precursor	M162W
BC:Z:CACAACAGTATTCTCTTCGCTTCGGA-Xuan_Zm_8_geno_scifi-merged	1749	847	1313	0	1084	3.03503	0.484277	0.750715	0	1749	Singlet	CACAACAGTATTCTCT	TCGCT	TCGGA	B73	-1.19984	1.74978	0.0706767	singlet	16	Procabium_phloem_precursor	B73_rep1
BC:Z:CCGTAGGTCGCGCTGATCGCTTCGGA-Xuan_Zm_8_geno_scifi-merged	3897	1631	2654	0	2386	3.37767	0.418527	0.681037	0	3897	Singlet	CCGTAGGTCGCGCTGA	TCGCT	TCGGA	B73	-3.3908	2.99825	0.0481203	singlet	1	Bundle_sheath	B73_rep1
BC:Z:TTCGCGTGTGAGGGTTACTACTCATT-Xuan_Zm_8_geno_scifi-merged	5817	2384	3965	0	3522	3.54679	0.409833	0.681623	0	5817	Singlet	TTCGCGTGTGAGGGTT	ACTAC	TCATT	M162W	-3.35778	-1.3201	0.0796992	singlet	14	Axillary_meristem	M162W
BC:Z:TCTAGTTAGCAGAGCTCGCGATCGGA-Xuan_Zm_8_geno_scifi-merged	12036	5697	9542	0	7147	3.85412	0.47333	0.792788	0	12036	Singlet	TCTAGTTAGCAGAGCT	CGCGA	TCGGA	B73	3.33108	2.36969	0.0556391	singlet	12	Vascular_parenchyma_precursor	B73_rep1
BC:Z:TCTAGTTAGCAGAGCTTATACTCGGA-Xuan_Zm_8_geno_scifi-merged	3404	1616	2685	0	2072	3.31639	0.474736	0.788778	0	3404	Singlet	TCTAGTTAGCAGAGCT	TATAC	TCGGA	B73	3.36862	2.38202	0.0526316	singlet	12	Vascular_parenchyma_precursor	B73_rep1
BC:Z:TCTAGTTAGCAGAGCTTCGCTTCGGA-Xuan_Zm_8_geno_scifi-merged	6032	2755	4634	0	3601	3.55642	0.456731	0.768236	0	6032	Singlet	TCTAGTTAGCAGAGCT	TCGCT	TCGGA	B73	-3.95297	-0.715184	0.0616541	singlet	11	Ground_meristem	B73_rep1
BC:Z:TCACCACCAATCATCGCGCGATCGGA-Xuan_Zm_8_geno_scifi-merged	1679	763	1267	0	1039	3.01662	0.454437	0.754616	0	1679	Singlet	TCACCACCAATCATCG	CGCGA	TCGGA	B73	-1.09755	2.02464	0.0646617	singlet	14	Axillary_meristem	B73_rep1
BC:Z:TCACCACCAATCATCGTATACTCGGA-Xuan_Zm_8_geno_scifi-merged	1243	573	857	0	768	2.88536	0.460981	0.689461	0	1243	Singlet	TCACCACCAATCATCG	TATAC	TCGGA	B73	-2.63546	-0.263601	0.0616541	singlet	11	Ground_meristem	B73_rep1
BC:Z:CGCACAGGTCAGCAAGCTTAGGTTTC-Xuan_Zm_8_geno_scifi-merged	7667	3623	6175	0	4573	3.6602	0.472545	0.8054	0	7667	Singlet	CGCACAGGTCAGCAAG	CTTAG	GTTTC	B97	0.28113	-1.08803	0.0902256	singlet	5	Axillary_meristem	B97
BC:Z:ATGTCTTAGACACAATCTTAGGCTCC-Xuan_Zm_8_geno_scifi-merged	1594	742	1354	0	952	2.97864	0.465496	0.849435	0	1594	Singlet	ATGTCTTAGACACAAT	CTTAG	GCTCC	Mo18W	4.23181	-3.56886	0.105263	singlet	10	Epidermis	Mo18W
BC:Z:TACTAGGTCCAGCACGCTTAGCGAGG-Xuan_Zm_8_geno_scifi-merged	4520	2261	3908	0	2710	3.43297	0.500221	0.864602	0	4520	Singlet	TACTAGGTCCAGCACG	CTTAG	CGAGG	OH7B	-3.85315	-0.752383	0.075188	singlet	11	Ground_meristem	OH7B
BC:Z:ACTATTCCACAGCTTAAGTAAGTTTC-Xuan_Zm_8_geno_scifi-merged	1317	621	1083	0	798	2.902	0.471526	0.822323	0	1317	Singlet	ACTATTCCACAGCTTA	AGTAA	GTTTC	B97	0.852299	1.90862	0.109774	singlet	3	Vascular_parenchyma_precursor	B97
BC:Z:GAGAACGTCTTAAGCGAATTGACCGG-Xuan_Zm_8_geno_scifi-merged	4856	2285	4261	0	2904	3.463	0.470552	0.877471	0	4856	Singlet	GAGAACGTCTTAAGCG	AATTG	ACCGG	Tzi8	4.93133	-1.21737	0.0827068	singlet	13	Vascular_parenchyma_precursor	Tzi8
BC:Z:TGATCAGAGGTTCTCATCGCTGTTTC-Xuan_Zm_8_geno_scifi-merged	2396	1109	1795	0	1476	3.16909	0.462855	0.749165	0	2396	Singlet	TGATCAGAGGTTCTCA	TCGCT	GTTTC	B97	2.8038	-0.258809	0.0781955	singlet	3	Vascular_parenchyma_precursor	B97
BC:Z:CCATACCTCAGGTTTGTCGCTCGAGG-Xuan_Zm_8_geno_scifi-merged	20082	9570	17025	0	11464	4.05934	0.476546	0.847774	0	20082	Singlet	CCATACCTCAGGTTTG	TCGCT	CGAGG	OH7B	3.02505	0.0844639	0.0857143	singlet	3	Vascular_parenchyma_precursor	OH7B
BC:Z:ACAGCGCGTACTTCAGCTTAGTCGGA-Xuan_Zm_8_geno_scifi-merged	6142	2987	5265	0	3610	3.55751	0.486324	0.857213	0	6142	Singlet	ACAGCGCGTACTTCAG	CTTAG	TCGGA	B73	-4.91325	-2.11852	0.0721805	singlet	11	Ground_meristem	B73_rep1
BC:Z:TGTAGCAGTCGTAATCAGATGTCGGA-Xuan_Zm_8_geno_scifi-merged	8011	3788	6653	0	4713	3.6733	0.47285	0.830483	0	8011	Singlet	TGTAGCAGTCGTAATC	AGATG	TCGGA	B73	-2.88643	3.97711	0.0706767	singlet	1	Bundle_sheath	B73_rep1
BC:Z:CTAGGGCCAGACCTGCAGTAATCGGA-Xuan_Zm_8_geno_scifi-merged	16356	7841	13734	0	9405	3.97336	0.479396	0.839692	0	16356	Singlet	CTAGGGCCAGACCTGC	AGTAA	TCGGA	B73	4.6582	-1.42527	0.0977444	singlet	4	Vascular_parenchyma_precursor	B73_rep1
BC:Z:TTGTTCAAGACCAATAAATTGCGAGG-Xuan_Zm_8_geno_scifi-merged	1483	698	1107	0	889	2.9489	0.470668	0.74646	0	1483	Singlet	TTGTTCAAGACCAATA	AATTG	CGAGG	OH7B	-0.136438	-2.95707	0.0676692	singlet	9	Guard_cell_precursor	OH7B
BC:Z:GCATGATAGCGAATATAGTAAACCGG-Xuan_Zm_8_geno_scifi-merged	2644	1359	2137	0	1607	3.20602	0.513994	0.808245	0	2644	Singlet	GCATGATAGCGAATAT	AGTAA	ACCGG	Tzi8	-1.96429	0.999683	0.0796992	singlet	5	Axillary_meristem	Tzi8
BC:Z:AACGAGGTCGACTTAGAGATGGTTTC-Xuan_Zm_8_geno_scifi-merged	6259	2898	4846	0	3726	3.57124	0.463013	0.774245	0	6259	Singlet	AACGAGGTCGACTTAG	AGATG	GTTTC	B97	5.35024	-1.18223	0.0736842	singlet	13	Vascular_parenchyma_precursor	B97
BC:Z:AAACTGCCACTGATACAGTAACGAGG-Xuan_Zm_8_geno_scifi-merged	7595	3670	6482	0	4478	3.65108	0.483213	0.853456	0	7595	Singlet	AAACTGCCACTGATAC	AGTAA	CGAGG	OH7B	3.79283	2.71874	0.0721805	singlet	12	Vascular_parenchyma_precursor	OH7B
BC:Z:GCCTAGGTCTCGTGAACGTATTCGGA-Xuan_Zm_8_geno_scifi-merged	1921	874	1421	0	1181	3.07225	0.454971	0.739719	0	1921	Singlet	GCCTAGGTCTCGTGAA	CGTAT	TCGGA	B73	-0.676875	-2.9405	0.0526316	singlet	9	Guard_cell_precursor	B73_rep1
BC:Z:TCAAGACGTGAATCAAGGAATGTTTC-Xuan_Zm_8_geno_scifi-merged	4144	2076	3474	0	2502	3.39829	0.500965	0.83832	0	4144	Singlet	TCAAGACGTGAATCAA	GGAAT	GTTTC	B97	-1.20339	1.44408	0.0887218	singlet	16	Procabium_phloem_precursor	B97
BC:Z:TAGACTGGTAGAAAGGAGATGACCGG-Xuan_Zm_8_geno_scifi-merged	2117	991	1711	0	1289	3.11025	0.468115	0.808219	0	2117	Singlet	TAGACTGGTAGAAAGG	AGATG	ACCGG	Tzi8	-3.39881	3.35918	0.0736842	singlet	1	Bundle_sheath	Tzi8
BC:Z:TCCAGAATCCATAACGTCGCTACCGG-Xuan_Zm_8_geno_scifi-merged	2021	908	1561	0	1242	3.09412	0.449283	0.77239	0	2021	Singlet	TCCAGAATCCATAACG	TCGCT	ACCGG	Tzi8	-3.35602	1.88656	0.0466165	singlet	2	Bundle_sheath	Tzi8
BC:Z:GGGTGTCGTACAAGCGAATTGTCATT-Xuan_Zm_8_geno_scifi-merged	2288	1087	1824	0	1397	3.1452	0.475087	0.797203	0	2288	Singlet	GGGTGTCGTACAAGCG	AATTG	TCATT	M162W	-0.779572	-0.567406	0.0796992	singlet	3	Vascular_parenchyma_precursor	M162W
BC:Z:ATCCTCGCACCCTTTGCGACACGAGG-Xuan_Zm_8_geno_scifi-merged	3358	1645	2877	0	2027	3.30685	0.489875	0.85676	0	3358	Singlet	ATCCTCGCACCCTTTG	CGACA	CGAGG	OH7B	3.19952	-1.30093	0.0947368	singlet	15	Protoderm	OH7B
BC:Z:CAACGTACAAGTCCTAAAGTCCGAGG-Xuan_Zm_8_geno_scifi-merged	1532	701	1283	0	942	2.97405	0.457572	0.837467	0	1532	Singlet	CAACGTACAAGTCCTA	AAGTC	CGAGG	OH7B	-3.79893	-0.512426	0.0586466	singlet	11	Ground_meristem	OH7B
BC:Z:TCTATTGGTGGAGTGTCGACATCATT-Xuan_Zm_8_geno_scifi-merged	3352	1527	2520	0	2066	3.31513	0.455549	0.75179	0	3352	Singlet	TCTATTGGTGGAGTGT	CGACA	TCATT	M162W	3.6255	0.117691	0.0691729	singlet	3	Vascular_parenchyma_precursor	M162W
BC:Z:TACAGCAGTTTGTACGCGTATTCATT-Xuan_Zm_8_geno_scifi-merged	4629	2246	3727	0	2783	3.44451	0.485202	0.805141	0	4629	Singlet	TACAGCAGTTTGTACG	CGTAT	TCATT	M162W	-1.15093	-1.5439	0.0766917	singlet	3	Vascular_parenchyma_precursor	M162W
BC:Z:ATGTACGGTACGAGACAGATGTCATT-Xuan_Zm_8_geno_scifi-merged	1285	575	1069	0	775	2.8893	0.447471	0.831907	0	1285	Singlet	ATGTACGGTACGAGAC	AGATG	TCATT	M162W	-1.09239	1.71953	0.0646617	singlet	3	Vascular_parenchyma_precursor	M162W
BC:Z:GCCCGAATCGGTTAGTCGTATACCGG-Xuan_Zm_8_geno_scifi-merged	20011	9473	16613	0	11399	4.05687	0.47339	0.830193	0	20011	Singlet	GCCCGAATCGGTTAGT	CGTAT	ACCGG	Tzi8	4.39218	1.4766	0.0977444	singlet	12	Vascular_parenchyma_precursor	Tzi8
BC:Z:GTCGTAACATGCGACCGGAATTCATT-Xuan_Zm_8_geno_scifi-merged	1062	508	950	0	642	2.80754	0.478343	0.894539	0	1062	Singlet	GTCGTAACATGCGACC	GGAAT	TCATT	M162W	-4.61796	-1.57295	0.0466165	singlet	11	Ground_meristem	M162W
BC:Z:AACGAGGAGACCGCAATATACTCGGA-Xuan_Zm_8_geno_scifi-merged	2170	1096	1912	0	1306	3.11594	0.505069	0.881106	0	2170	Singlet	AACGAGGAGACCGCAA	TATAC	TCGGA	B73	-2.2887	1.25804	0.0827068	singlet	2	Bundle_sheath	B73_rep1
BC:Z:CCAATGAGTTAACCACCGTATGTTTC-Xuan_Zm_8_geno_scifi-merged	1661	767	1248	0	1022	3.00945	0.46177	0.751355	0	1661	Singlet	CCAATGAGTTAACCAC	CGTAT	GTTTC	B97	3.32799	-1.31437	0.0511278	singlet	15	Protoderm	B97
BC:Z:CAGCCTTAGCTTACCACTTAGGCTCC-Xuan_Zm_8_geno_scifi-merged	1073	495	732	0	659	2.81889	0.461323	0.682199	0	1073	Singlet	CAGCCTTAGCTTACCA	CTTAG	GCTCC	Mo18W	-0.561214	-2.92729	0.0736842	singlet	9	Guard_cell_precursor	Mo18W
BC:Z:ATAGTCGGTTACACTGCGTATTCGGA-Xuan_Zm_8_geno_scifi-merged	1129	528	878	0	692	2.84011	0.467671	0.777679	0	1129	Singlet	ATAGTCGGTTACACTG	CGTAT	TCGGA	B73	3.51457	-3.09962	0.0721805	singlet	9	Guard_cell_precursor	B73_rep1
BC:Z:GGATAGGCACTCGCAGAGATGTCATT-Xuan_Zm_8_geno_scifi-merged	1268	577	855	0	770	2.88649	0.455047	0.67429	0	1268	Singlet	GGATAGGCACTCGCAG	AGATG	TCATT	M162W	-2.56163	0.116582	0.0842105	singlet	5	Axillary_meristem	M162W
BC:Z:GGATAGGCACTCGCAGAGTAATCGGA-Xuan_Zm_8_geno_scifi-merged	1402	644	1189	0	849	2.92891	0.459344	0.848074	0	1402	Singlet	GGATAGGCACTCGCAG	AGTAA	TCGGA	B73	3.99465	0.014608	0.0421053	singlet	3	Vascular_parenchyma_precursor	B73_rep1
BC:Z:GGATAGGCACTCGCAGTATACTCGGA-Xuan_Zm_8_geno_scifi-merged	1358	679	1131	0	835	2.92169	0.5	0.832842	0	1358	Singlet	GGATAGGCACTCGCAG	TATAC	TCGGA	B73	3.35675	0.714701	0.0902256	singlet	12	Vascular_parenchyma_precursor	B73_rep1
BC:Z:ATTACTCCAATGATGAGGAATTCGGA-Xuan_Zm_8_geno_scifi-merged	18392	7606	12614	0	10887	4.03691	0.413549	0.685842	0	18392	Singlet	ATTACTCCAATGATGA	GGAAT	TCGGA	B73	2.90897	-2.34976	0.0526316	singlet	3	Vascular_parenchyma_precursor	B73_rep1
BC:Z:AAAGATGCAAGTAATGTCGCTTCGGA-Xuan_Zm_8_geno_scifi-merged	5313	2477	4289	0	3173	3.50147	0.466215	0.807265	0	5313	Singlet	AAAGATGCAAGTAATG	TCGCT	TCGGA	B73	-1.2422	-2.54053	0.0541353	singlet	9	Guard_cell_precursor	B73_rep1
BC:Z:GATCATGTCAGTGGTTCTTAGGTTTC-Xuan_Zm_8_geno_scifi-merged	1037	489	888	0	628	2.79796	0.471553	0.856316	0	1037	Singlet	GATCATGTCAGTGGTT	CTTAG	GTTTC	B97	-0.742626	-2.89482	0.0857143	singlet	9	Guard_cell_precursor	B97
BC:Z:TAACGGTCAACTCGATCGTATGTTTC-Xuan_Zm_8_geno_scifi-merged	1867	962	1598	0	1132	3.05385	0.515265	0.855919	0	1867	Singlet	TAACGGTCAACTCGAT	CGTAT	GTTTC	B97	-0.325621	2.15902	0.0827068	singlet	6	Vascular_parenchyma	B97
BC:Z:GCGGAAATCTTGTCGCTCGCTGTTTC-Xuan_Zm_8_geno_scifi-merged	6511	3035	5513	0	3885	3.58939	0.466134	0.846721	0	6511	Singlet	GCGGAAATCTTGTCGC	TCGCT	GTTTC	B97	2.7893	-0.218731	0.075188	singlet	3	Vascular_parenchyma_precursor	B97
BC:Z:GGCGTTGCAAGCGTCCCGACATCGGA-Xuan_Zm_8_geno_scifi-merged	1633	820	1348	0	1011	3.00475	0.502143	0.825475	0	1633	Singlet	GGCGTTGCAAGCGTCC	CGACA	TCGGA	B73	3.15862	-1.31903	0.0842105	singlet	15	Protoderm	B73_rep1
BC:Z:ACCTGCTTCGCGATGCCGACAACCGG-Xuan_Zm_8_geno_scifi-merged	9725	4631	8085	0	5767	3.76095	0.476195	0.831362	0	9725	Singlet	ACCTGCTTCGCGATGC	CGACA	ACCGG	Tzi8	3.67773	-0.222524	0.0842105	singlet	3	Vascular_parenchyma_precursor	Tzi8
BC:Z:ATTCGTTCAGGTGTCCACTACCGAGG-Xuan_Zm_8_geno_scifi-merged	1216	586	1084	0	744	2.87157	0.481908	0.891447	0	1216	Singlet	ATTCGTTCAGGTGTCC	ACTAC	CGAGG	OH7B	-4.87057	-3.53235	0.108271	singlet	8	Mesophyll	OH7B
BC:Z:TGACTCCCATCATAGCAAGTCACCGG-Xuan_Zm_8_geno_scifi-merged	3290	1492	2554	0	2049	3.31154	0.453495	0.776292	0	3290	Singlet	TGACTCCCATCATAGC	AAGTC	ACCGG	Tzi8	-2.12369	4.56933	0.109774	singlet	1	Bundle_sheath	Tzi8
BC:Z:GTTATTCCATTGAACCAATTGACTAA-Xuan_Zm_8_geno_scifi-merged	2226	1075	1950	0	1344	3.1284	0.482929	0.876011	0	2226	Singlet	GTTATTCCATTGAACC	AATTG	ACTAA	Ky21	0.967758	2.29566	0.0887218	singlet	6	Vascular_parenchyma	Ky21
BC:Z:TTGCGAAGTAAAGGCCCGTATTCGGA-Xuan_Zm_8_geno_scifi-merged	1229	592	952	0	747	2.87332	0.481692	0.774614	0	1229	Singlet	TTGCGAAGTAAAGGCC	CGTAT	TCGGA	B73	3.14114	2.51651	0.0631579	singlet	5	Axillary_meristem	B73_rep1
BC:Z:CGCTGGATCTTAACGGAAGTCCGAGG-Xuan_Zm_8_geno_scifi-merged	3047	1434	2334	0	1834	3.2634	0.470627	0.765999	0	3047	Singlet	CGCTGGATCTTAACGG	AAGTC	CGAGG	OH7B	-1.6816	-1.71728	0.0721805	singlet	5	Axillary_meristem	OH7B
BC:Z:ATCCTCGTCGCTATTTAGTAATCATT-Xuan_Zm_8_geno_scifi-merged	1383	639	1115	0	847	2.92788	0.462039	0.806218	0	1383	Singlet	ATCCTCGTCGCTATTT	AGTAA	TCATT	M162W	-1.41207	0.463575	0.0556391	singlet	14	Axillary_meristem	M162W
BC:Z:GAAGTGGGTGTCGTCGGGAATGTTTC-Xuan_Zm_8_geno_scifi-merged	2393	1206	2013	0	1456	3.16316	0.50397	0.841204	0	2393	Singlet	GAAGTGGGTGTCGTCG	GGAAT	GTTTC	B97	-2.17417	0.968174	0.0631579	singlet	3	Vascular_parenchyma_precursor	B97
BC:Z:GTTATTCAGGTACACGCGTATGTTTC-Xuan_Zm_8_geno_scifi-merged	8628	4230	7547	0	5042	3.7026	0.490264	0.87471	0	8628	Singlet	GTTATTCAGGTACACG	CGTAT	GTTTC	B97	0.321016	-3.07768	0.100752	singlet	9	Guard_cell_precursor	B97
BC:Z:TTAGCTTTCGGTTAGTTATACGTTTC-Xuan_Zm_8_geno_scifi-merged	6703	3156	5417	0	4035	3.60584	0.470834	0.808146	0	6703	Singlet	TTAGCTTTCGGTTAGT	TATAC	GTTTC	B97	2.99139	0.389881	0.0781955	singlet	3	Vascular_parenchyma_precursor	B97
BC:Z:TTTGAGGCAGATAAGTCTTAGTCATT-Xuan_Zm_8_geno_scifi-merged	4202	2015	3604	0	2535	3.40398	0.479534	0.857687	0	4202	Singlet	TTTGAGGCAGATAAGT	CTTAG	TCATT	M162W	-0.147479	-3.06688	0.112782	singlet	9	Guard_cell_precursor	M162W
BC:Z:GTGATCATCGACCCGACGACAGTTTC-Xuan_Zm_8_geno_scifi-merged	1794	844	1535	0	1105	3.04336	0.470457	0.85563	0	1794	Singlet	GTGATCATCGACCCGA	CGACA	GTTTC	B97	4.64015	0.891204	0.0706767	singlet	13	Vascular_parenchyma_precursor	B97
BC:Z:TATTGCTTCAAGGCAGCGTATGTTTC-Xuan_Zm_8_geno_scifi-merged	7123	3175	5184	0	4217	3.625	0.445739	0.727783	0	7123	Singlet	TATTGCTTCAAGGCAG	CGTAT	GTTTC	B97	3.35622	-1.37589	0.0616541	singlet	15	Protoderm	B97
BC:Z:CCAGAATCATTGCCTCTCGCTTCGGA-Xuan_Zm_8_geno_scifi-merged	7724	3809	6830	0	4540	3.65706	0.493138	0.884257	0	7724	Singlet	CCAGAATCATTGCCTC	TCGCT	TCGGA	B73	-3.58132	3.11144	0.0781955	singlet	4	Vascular_parenchyma_precursor	B73_rep1
BC:Z:TAAACCGAGCCATCATCGTATGTTTC-Xuan_Zm_8_geno_scifi-merged	7763	3610	6148	0	4612	3.66389	0.465026	0.791962	0	7763	Singlet	TAAACCGAGCCATCAT	CGTAT	GTTTC	B97	4.8924	-1.49795	0.111278	singlet	13	Vascular_parenchyma_precursor	B97
BC:Z:CGCACAGCAAAGGAAGTATACAGCTT-Xuan_Zm_8_geno_scifi-merged	1632	714	1220	0	1017	3.00732	0.4375	0.747549	0	1632	Singlet	CGCACAGCAAAGGAAG	TATAC	AGCTT	B73	-2.27045	4.42958	0.0631579	singlet	1	Bundle_sheath	B73_rep2
BC:Z:AAAGGGCGTCTAACCACTTAGACTAA-Xuan_Zm_8_geno_scifi-merged	6199	2926	4367	0	3737	3.57252	0.472012	0.704468	0	6199	Singlet	AAAGGGCGTCTAACCA	CTTAG	ACTAA	Ky21	4.3654	-3.05719	0.0571429	singlet	10	Epidermis	Ky21
BC:Z:AACCAACAGGCAAGGGCGTATACTAA-Xuan_Zm_8_geno_scifi-merged	1858	886	1589	0	1136	3.05538	0.476857	0.855221	0	1858	Singlet	AACCAACAGGCAAGGG	CGTAT	ACTAA	Ky21	1.24566	2.83034	0.0827068	singlet	6	Vascular_parenchyma	Ky21
BC:Z:AACTGTGAGATAGGTTTCGCTACTAA-Xuan_Zm_8_geno_scifi-merged	1617	780	1180	0	983	2.99255	0.482375	0.729746	0	1617	Singlet	AACTGTGAGATAGGTT	TCGCT	ACTAA	Ky21	3.84585	2.47957	0.0691729	singlet	12	Vascular_parenchyma_precursor	Ky21
BC:Z:CTGTATTGTTCCAGTAACTACACTAA-Xuan_Zm_8_geno_scifi-merged	4471	2168	3667	0	2686	3.42911	0.484903	0.820174	0	4471	Singlet	CTGTATTGTTCCAGTA	ACTAC	ACTAA	Ky21	-4.00239	-1.55447	0.081203	singlet	3	Vascular_parenchyma_precursor	Ky21
BC:Z:TATTGCTCAGAGAGAACGACAACTAA-Xuan_Zm_8_geno_scifi-merged	2041	978	1810	0	1254	3.0983	0.479177	0.88682	0	2041	Singlet	TATTGCTCAGAGAGAA	CGACA	ACTAA	Ky21	-2.96593	3.84165	0.0330827	singlet	1	Bundle_sheath	Ky21
BC:Z:TCTCTGGTCTTCACTAAATTGACTAA-Xuan_Zm_8_geno_scifi-merged	1026	420	806	0	632	2.80072	0.409357	0.785575	0	1026	Singlet	TCTCTGGTCTTCACTA	AATTG	ACTAA	Ky21	-2.84631	2.76332	0.0781955	singlet	3	Vascular_parenchyma_precursor	Ky21
BC:Z:TGATGCAGTAAGTGCGTATACACTAA-Xuan_Zm_8_geno_scifi-merged	10797	5222	8972	0	6390	3.8055	0.483653	0.830972	0	10797	Singlet	TGATGCAGTAAGTGCG	TATAC	ACTAA	Ky21	1.82944	1.72903	0.0631579	singlet	3	Vascular_parenchyma_precursor	Ky21
BC:Z:ACAAGCTAGTCGATAAGGAATACTAA-Xuan_Zm_8_geno_scifi-merged	5262	2652	4390	2	3128	3.49527	0.503991	0.834284	0.000380084	5262	Singlet	ACAAGCTAGTCGATAA	GGAAT	ACTAA	Ky21	-1.0931	-2.77986	0.0345865	singlet	9	Guard_cell_precursor	Ky21
BC:Z:ACATGGTAGGTTCGAGACTACCGAGG-Xuan_Zm_8_geno_scifi-merged	5751	2553	3886	0	3483	3.54195	0.443923	0.675709	0	5751	Singlet	ACATGGTAGGTTCGAG	ACTAC	CGAGG	OH7B	-1.81067	0.549997	0.0421053	singlet	14	Axillary_meristem	OH7B
BC:Z:GAGTGAGAGTAGTCGGAAGTCCGAGG-Xuan_Zm_8_geno_scifi-merged	1076	486	906	0	658	2.81823	0.451673	0.842007	0	1076	Singlet	GAGTGAGAGTAGTCGG	AAGTC	CGAGG	OH7B	1.09643	-2.98473	0.0586466	singlet	9	Guard_cell_precursor	OH7B
BC:Z:GGGCCATGTTACTTTCAGATGCGAGG-Xuan_Zm_8_geno_scifi-merged	2492	1120	1999	0	1527	3.18384	0.449438	0.802167	0	2492	Singlet	GGGCCATGTTACTTTC	AGATG	CGAGG	OH7B	0.26187	-1.0211	0.0631579	singlet	5	Axillary_meristem	OH7B
BC:Z:TGTTAGGCAAGTCTCAGGAATCGAGG-Xuan_Zm_8_geno_scifi-merged	2120	1037	1814	0	1323	3.12156	0.489151	0.85566	0	2120	Singlet	TGTTAGGCAAGTCTCA	GGAAT	CGAGG	OH7B	1.14711	-2.91254	0.081203	singlet	9	Guard_cell_precursor	OH7B
BC:Z:TTGCCCATCAACTTGGCTTAGACCGG-Xuan_Zm_8_geno_scifi-merged	1304	590	1085	0	789	2.89708	0.452454	0.832055	0	1304	Singlet	TTGCCCATCAACTTGG	CTTAG	ACCGG	Tzi8	-4.98684	-2.09076	0.0766917	singlet	11	Ground_meristem	Tzi8
BC:Z:AGTGCCGGTAGACGCACGTATGTTTC-Xuan_Zm_8_geno_scifi-merged	4971	2356	4124	0	3009	3.47842	0.473949	0.829612	0	4971	Singlet	AGTGCCGGTAGACGCA	CGTAT	GTTTC	B97	4.42537	0.0102536	0.0631579	singlet	3	Vascular_parenchyma_precursor	B97
BC:Z:CATTCCGTCCGCTCTACTTAGGTTTC-Xuan_Zm_8_geno_scifi-merged	4985	2332	4047	0	3008	3.47828	0.467803	0.811836	0	4985	Singlet	CATTCCGTCCGCTCTA	CTTAG	GTTTC	B97	-1.44379	0.360588	0.108271	singlet	3	Vascular_parenchyma_precursor	B97
BC:Z:AGCCTGGTCCTTTGATGGAATGTTTC-Xuan_Zm_8_geno_scifi-merged	1237	614	1004	0	747	2.87332	0.496362	0.811641	0	1237	Singlet	AGCCTGGTCCTTTGAT	GGAAT	GTTTC	B97	-3.09213	-0.467053	0.0902256	singlet	11	Ground_meristem	B97
BC:Z:CAACGTAAGGGTGTTGACTACGTTTC-Xuan_Zm_8_geno_scifi-merged	1343	672	1105	0	806	2.90634	0.500372	0.822785	0	1343	Singlet	CAACGTAAGGGTGTTG	ACTAC	GTTTC	B97	-1.27542	1.70133	0.0781955	singlet	16	Procabium_phloem_precursor	B97
BC:Z:GCGATCGCAAGGCTTTCGACAGTTTC-Xuan_Zm_8_geno_scifi-merged	1824	849	1206	0	1117	3.04805	0.465461	0.661184	0	1824	Singlet	GCGATCGCAAGGCTTT	CGACA	GTTTC	B97	-4.36723	-0.805085	0.0601504	singlet	11	Ground_meristem	B97
BC:Z:GGTTGCGTCCACGGCACTTAGGTTTC-Xuan_Zm_8_geno_scifi-merged	1346	709	1166	0	812	2.90956	0.526746	0.86627	0	1346	Singlet	GGTTGCGTCCACGGCA	CTTAG	GTTTC	B97	-0.717992	1.44479	0.114286	singlet	7	Xylem	B97
BC:Z:TACCCTGCAGGTAACGAGTAAGTTTC-Xuan_Zm_8_geno_scifi-merged	2744	1308	2324	0	1682	3.22583	0.476676	0.846939	0	2744	Singlet	TACCCTGCAGGTAACG	AGTAA	GTTTC	B97	-1.72228	-1.0096	0.0556391	singlet	3	Vascular_parenchyma_precursor	B97
BC:Z:TAGCGGCGTGCACTTAGGAATGTTTC-Xuan_Zm_8_geno_scifi-merged	3009	1520	2544	0	1835	3.26364	0.505151	0.845464	0	3009	Singlet	TAGCGGCGTGCACTTA	GGAAT	GTTTC	B97	-1.37559	-2.54631	0.0601504	singlet	9	Guard_cell_precursor	B97
BC:Z:TATGTGGGTGGTTCTAACTACGTTTC-Xuan_Zm_8_geno_scifi-merged	2902	1453	2516	0	1772	3.24846	0.500689	0.866988	0	2902	Singlet	TATGTGGGTGGTTCTA	ACTAC	GTTTC	B97	-3.76599	-1.41743	0.0766917	singlet	11	Ground_meristem	B97
BC:Z:TGGTCAAAGTGAAACTCGACAGTTTC-Xuan_Zm_8_geno_scifi-merged	1830	877	1486	0	1116	3.04766	0.479235	0.812022	0	1830	Singlet	TGGTCAAAGTGAAACT	CGACA	GTTTC	B97	4.09033	1.91617	0.0360902	singlet	12	Vascular_parenchyma_precursor	B97
BC:Z:CTTGCCAAGTTCCAGTAGTAAACCGG-Xuan_Zm_8_geno_scifi-merged	2973	1367	2267	0	1804	3.25624	0.459805	0.762529	0	2973	Singlet	CTTGCCAAGTTCCAGT	AGTAA	ACCGG	Tzi8	-3.63965	-0.0824409	0.0992481	singlet	11	Ground_meristem	Tzi8
BC:Z:ATATTCCGTTACTACGCTTAGGTTTC-Xuan_Zm_8_geno_scifi-merged	2368	1171	1940	0	1461	3.16465	0.49451	0.819257	0	2368	Singlet	ATATTCCGTTACTACG	CTTAG	GTTTC	B97	4.49601	-1.69323	0.0857143	singlet	3	Vascular_parenchyma_precursor	B97
BC:Z:ACCGAATAGCTGGAGTTCGCTGTTTC-Xuan_Zm_8_geno_scifi-merged	15793	7569	13158	0	9071	3.95766	0.479263	0.833154	0	15793	Singlet	ACCGAATAGCTGGAGT	TCGCT	GTTTC	B97	4.03311	-0.441083	0.0646617	singlet	3	Vascular_parenchyma_precursor	B97
BC:Z:CAATCCCAGCAAGGTCACTACGTTTC-Xuan_Zm_8_geno_scifi-merged	5280	2489	4326	0	3193	3.5042	0.471402	0.819318	0	5280	Singlet	CAATCCCAGCAAGGTC	ACTAC	GTTTC	B97	-4.99196	-2.87926	0.0781955	singlet	3	Vascular_parenchyma_precursor	B97
BC:Z:ACCGCAGCAAATAGTGAAGTCTCGGA-Xuan_Zm_8_geno_scifi-merged	2774	1132	1810	0	1674	3.22376	0.408075	0.652487	0	2774	Singlet	ACCGCAGCAAATAGTG	AAGTC	TCGGA	B73	-2.35393	2.37074	0.0932331	singlet	16	Procabium_phloem_precursor	B73_rep1
BC:Z:ACCGCAGCAAATAGTGAGTAATCGGA-Xuan_Zm_8_geno_scifi-merged	1162	506	819	0	724	2.85974	0.435456	0.704819	0	1162	Singlet	ACCGCAGCAAATAGTG	AGTAA	TCGGA	B73	-3.32697	2.7377	0.0511278	singlet	2	Bundle_sheath	B73_rep1
BC:Z:TTCATCACACGCGACTCGTATTCATT-Xuan_Zm_8_geno_scifi-merged	1185	551	920	0	732	2.86451	0.464979	0.776371	0	1185	Singlet	TTCATCACACGCGACT	CGTAT	TCATT	M162W	-0.412915	1.08855	0.0962406	singlet	3	Vascular_parenchyma_precursor	M162W
BC:Z:CCACGTTCATCCCTTGTCGCTGTTTC-Xuan_Zm_8_geno_scifi-merged	6156	2853	4690	2	3681	3.56597	0.46345	0.761858	0.000324886	6156	Singlet	CCACGTTCATCCCTTG	TCGCT	GTTTC	B97	-2.57309	3.98978	0.081203	singlet	3	Vascular_parenchyma_precursor	B97
BC:Z:ATCCTCGAGCTGAATATATACACTAA-Xuan_Zm_8_geno_scifi-merged	38982	18800	32038	0	20939	4.32096	0.482274	0.821867	0	38982	Singlet	ATCCTCGAGCTGAATA	TATAC	ACTAA	Ky21	3.47406	-2.35259	0.103759	singlet	3	Vascular_parenchyma_precursor	Ky21
BC:Z:TTCATTGGTGGCCTCAAGATGACTAA-Xuan_Zm_8_geno_scifi-merged	1368	674	1190	0	836	2.92221	0.49269	0.869883	0	1368	Singlet	TTCATTGGTGGCCTCA	AGATG	ACTAA	Ky21	-2.60369	-1.0768	0.0857143	singlet	14	Axillary_meristem	Ky21
BC:Z:GAGCGCTAGGATCCTTCGTATTCATT-Xuan_Zm_8_geno_scifi-merged	2179	1037	1647	0	1335	3.12548	0.475906	0.755851	0	2179	Singlet	GAGCGCTAGGATCCTT	CGTAT	TCATT	M162W	-1.4323	1.19853	0.0766917	singlet	14	Axillary_meristem	M162W
BC:Z:TAGCACAAGGAGGCGAAGTAAACTAA-Xuan_Zm_8_geno_scifi-merged	1789	826	1502	0	1077	3.03222	0.46171	0.839575	0	1789	Singlet	TAGCACAAGGAGGCGA	AGTAA	ACTAA	Ky21	-4.97127	-3.57351	0.0421053	singlet	8	Mesophyll	Ky21
BC:Z:CTACAGAAGTTAGAGTAATTGTCATT-Xuan_Zm_8_geno_scifi-merged	1448	696	1241	0	889	2.9489	0.480663	0.857044	0	1448	Singlet	CTACAGAAGTTAGAGT	AATTG	TCATT	M162W	5.15226	-0.0195686	0.0481203	singlet	13	Vascular_parenchyma_precursor	M162W
BC:Z:TTGCGAACATCTCTCGAGTAAGCTCC-Xuan_Zm_8_geno_scifi-merged	1473	663	1105	0	914	2.96095	0.450102	0.75017	0	1473	Singlet	TTGCGAACATCTCTCG	AGTAA	GCTCC	Mo18W	4.25689	0.784275	0.0616541	singlet	13	Vascular_parenchyma_precursor	Mo18W
BC:Z:GGGCCATGTCCGTGCAAATTGTCATT-Xuan_Zm_8_geno_scifi-merged	3920	1741	3117	0	2375	3.37566	0.444133	0.795153	0	3920	Singlet	GGGCCATGTCCGTGCA	AATTG	TCATT	M162W	3.98016	-2.63027	0.0917293	singlet	10	Epidermis	M162W
BC:Z:ATGTCGAGTAAGTGCGAATTGACCGG-Xuan_Zm_8_geno_scifi-merged	1019	472	805	0	635	2.80277	0.463199	0.78999	0	1019	Singlet	ATGTCGAGTAAGTGCG	AATTG	ACCGG	Tzi8	4.743	-0.316178	0.0796992	singlet	4	Vascular_parenchyma_precursor	Tzi8
BC:Z:ATGTCGAGTAAGTGCGAATTGCGAGG-Xuan_Zm_8_geno_scifi-merged	1720	814	1403	0	1044	3.0187	0.473256	0.815698	0	1720	Singlet	ATGTCGAGTAAGTGCG	AATTG	CGAGG	OH7B	4.7062	-0.361034	0.0526316	singlet	13	Vascular_parenchyma_precursor	OH7B
BC:Z:CAATCCCAGGTTGTGGGGAATGTTTC-Xuan_Zm_8_geno_scifi-merged	7963	3840	6587	0	4786	3.67997	0.48223	0.827201	0	7963	Singlet	CAATCCCAGGTTGTGG	GGAAT	GTTTC	B97	2.73915	0.171545	0.0631579	singlet	3	Vascular_parenchyma_precursor	B97
BC:Z:TGGCGCATCCAAGTCACTTAGACTAA-Xuan_Zm_8_geno_scifi-merged	6550	3280	5451	0	3877	3.5885	0.500763	0.832214	0	6550	Singlet	TGGCGCATCCAAGTCA	CTTAG	ACTAA	Ky21	-2.21119	0.711333	0.0541353	singlet	16	Procabium_phloem_precursor	Ky21
BC:Z:CACCTTGTCAAATGGACGTATGTTTC-Xuan_Zm_8_geno_scifi-merged	1669	788	1330	0	1023	3.00988	0.472139	0.796884	0	1669	Singlet	CACCTTGTCAAATGGA	CGTAT	GTTTC	B97	4.43608	1.56063	0.0721805	singlet	12	Vascular_parenchyma_precursor	B97
BC:Z:AACCAACAGCAATAACAATTGTCATT-Xuan_Zm_8_geno_scifi-merged	2596	1221	2140	0	1568	3.19535	0.470339	0.824345	0	2596	Singlet	AACCAACAGCAATAAC	AATTG	TCATT	M162W	-3.00703	3.62823	0.0526316	singlet	1	Bundle_sheath	M162W
BC:Z:ACATGCACACATCATGTATACTCATT-Xuan_Zm_8_geno_scifi-merged	4814	2343	4044	0	2914	3.46449	0.486705	0.84005	0	4814	Singlet	ACATGCACACATCATG	TATAC	TCATT	M162W	4.78976	0.405696	0.0571429	singlet	13	Vascular_parenchyma_precursor	M162W
BC:Z:ACCGCAGCAAATTCCGTCGCTCGAGG-Xuan_Zm_8_geno_scifi-merged	9588	4603	7745	0	5734	3.75846	0.480079	0.807781	0	9588	Singlet	ACCGCAGCAAATTCCG	TCGCT	CGAGG	OH7B	-0.751893	-1.00396	0.0947368	singlet	3	Vascular_parenchyma_precursor	OH7B
BC:Z:AGGACGAAGACCCATTAATTGCGAGG-Xuan_Zm_8_geno_scifi-merged	3334	1683	2912	0	2044	3.31048	0.504799	0.873425	0	3334	Singlet	AGGACGAAGACCCATT	AATTG	CGAGG	OH7B	3.80062	-3.09171	0.108271	singlet	3	Vascular_parenchyma_precursor	OH7B
BC:Z:ATTACTCTCGCACCTTTCGCTGTTTC-Xuan_Zm_8_geno_scifi-merged	7758	3635	6397	0	4596	3.66238	0.468549	0.824568	0	7758	Singlet	ATTACTCTCGCACCTT	TCGCT	GTTTC	B97	-1.20274	0.0433099	0.0932331	singlet	3	Vascular_parenchyma_precursor	B97
BC:Z:CAAGAAAGTGGGTAGTCTTAGTCATT-Xuan_Zm_8_geno_scifi-merged	7469	3569	6120	0	4476	3.65089	0.477842	0.819387	0	7469	Singlet	CAAGAAAGTGGGTAGT	CTTAG	TCATT	M162W	5.10294	0.565465	0.102256	singlet	3	Vascular_parenchyma_precursor	M162W
BC:Z:CCAATGAAGAGCTCCCAATTGTCATT-Xuan_Zm_8_geno_scifi-merged	1654	781	1388	0	1004	3.00173	0.472189	0.839178	0	1654	Singlet	CCAATGAAGAGCTCCC	AATTG	TCATT	M162W	-0.716048	-1.93401	0.0646617	singlet	3	Vascular_parenchyma_precursor	M162W
BC:Z:CGCAATACATTCTCGCGGAATTCATT-Xuan_Zm_8_geno_scifi-merged	1344	559	899	0	805	2.9058	0.415923	0.668899	0	1344	Singlet	CGCAATACATTCTCGC	GGAAT	TCATT	M162W	-3.61162	2.59388	0.0556391	singlet	2	Bundle_sheath	M162W
BC:Z:GCCATAAAGTAGACCGAGTAATCATT-Xuan_Zm_8_geno_scifi-merged	1587	799	1254	0	962	2.98318	0.503466	0.79017	0	1587	Singlet	GCCATAAAGTAGACCG	AGTAA	TCATT	M162W	-0.911583	1.46661	0.0947368	singlet	7	Xylem	M162W
BC:Z:TTGCTATAGTTCAGGGAAGTCGCTCC-Xuan_Zm_8_geno_scifi-merged	4435	2120	3481	0	2666	3.42586	0.478016	0.784893	0	4435	Singlet	TTGCTATAGTTCAGGG	AAGTC	GCTCC	Mo18W	5.12706	-0.547099	0.0526316	singlet	3	Vascular_parenchyma_precursor	Mo18W
BC:Z:TTGCTATCACAGTAGGAGTAACGAGG-Xuan_Zm_8_geno_scifi-merged	3012	1406	2410	0	1813	3.2584	0.466799	0.800133	0	3012	Singlet	TTGCTATCACAGTAGG	AGTAA	CGAGG	OH7B	-2.39855	-0.15846	0.100752	singlet	14	Axillary_meristem	OH7B
BC:Z:TTGTCTATCAGCACGCCGACACGAGG-Xuan_Zm_8_geno_scifi-merged	6015	2787	5110	0	3567	3.5523	0.463342	0.849543	0	6015	Singlet	TTGTCTATCAGCACGC	CGACA	CGAGG	OH7B	-0.0371152	-3.20976	0.0571429	singlet	9	Guard_cell_precursor	OH7B
BC:Z:GGGACCTCACACATGTACTACGTTTC-Xuan_Zm_8_geno_scifi-merged	1307	550	925	0	783	2.89376	0.420811	0.707728	0	1307	Singlet	GGGACCTCACACATGT	ACTAC	GTTTC	B97	3.34839	-0.590925	0.0917293	singlet	8	Mesophyll	B97
BC:Z:GTTCAAGGTACGGATGAGATGGTTTC-Xuan_Zm_8_geno_scifi-merged	1584	763	1160	0	959	2.98182	0.481692	0.732323	0	1584	Singlet	GTTCAAGGTACGGATG	AGATG	GTTTC	B97	4.82273	-0.988937	0.0736842	singlet	13	Vascular_parenchyma_precursor	B97
BC:Z:AGATTCGGTCTGTTGACGCGAGTTTC-Xuan_Zm_8_geno_scifi-merged	1308	634	1062	0	800	2.90309	0.484709	0.811927	0	1308	Singlet	AGATTCGGTCTGTTGA	CGCGA	GTTTC	B97	-2.96975	0.27619	0.0586466	singlet	3	Vascular_parenchyma_precursor	B97
BC:Z:AATACGCGTCCCTTTGCGCGATCGGA-Xuan_Zm_8_geno_scifi-merged	2469	1168	1991	0	1526	3.18355	0.473066	0.806399	0	2469	Singlet	AATACGCGTCCCTTTG	CGCGA	TCGGA	B73	-2.84374	1.19711	0.0917293	singlet	4	Vascular_parenchyma_precursor	B73_rep1
BC:Z:GTCGTAACAACCTCTCCGCGACGAGG-Xuan_Zm_8_geno_scifi-merged	7416	3496	6239	0	4483	3.65157	0.471413	0.841289	0	7416	Singlet	GTCGTAACAACCTCTC	CGCGA	CGAGG	OH7B	-1.53458	-0.727679	0.0676692	singlet	3	Vascular_parenchyma_precursor	OH7B
BC:Z:ATAGTCGCAGGCAAGTGGAATTCGGA-Xuan_Zm_8_geno_scifi-merged	1323	599	961	0	820	2.91381	0.452759	0.726379	0	1323	Singlet	ATAGTCGCAGGCAAGT	GGAAT	TCGGA	B73	3.88821	-2.68364	0.0496241	singlet	10	Epidermis	B73_rep1
BC:Z:GCAACCGTCCATGTTTAGTAATCGGA-Xuan_Zm_8_geno_scifi-merged	2115	929	1566	0	1286	3.10924	0.439243	0.740426	0	2115	Singlet	GCAACCGTCCATGTTT	AGTAA	TCGGA	B73	1.9911	2.55274	0.0736842	singlet	6	Vascular_parenchyma	B73_rep1
BC:Z:TGCTCGTTCCAGAGAGTATACCGAGG-Xuan_Zm_8_geno_scifi-merged	10701	4947	7451	0	6339	3.80202	0.462293	0.69629	0	10701	Singlet	TGCTCGTTCCAGAGAG	TATAC	CGAGG	OH7B	3.74911	-3.60196	0.0315789	singlet	10	Epidermis	OH7B
BC:Z:TAAACCGGTCAACTGTCTTAGACCGG-Xuan_Zm_8_geno_scifi-merged	5380	2248	3680	2	3276	3.51534	0.417844	0.684015	0.000371747	5380	Singlet	TAAACCGGTCAACTGT	CTTAG	ACCGG	Tzi8	-1.16174	-1.36371	0.0661654	singlet	3	Vascular_parenchyma_precursor	Tzi8
BC:Z:AAGGTTCCACATATCGAAGTCTCGGA-Xuan_Zm_8_geno_scifi-merged	3258	1556	2534	0	1963	3.29292	0.477594	0.777778	0	3258	Singlet	AAGGTTCCACATATCG	AAGTC	TCGGA	B73	-3.26886	1.90155	0.0541353	singlet	2	Bundle_sheath	B73_rep1
BC:Z:TACCCTGAGTAATGTGCGTATGTTTC-Xuan_Zm_8_geno_scifi-merged	7887	3724	6706	0	4602	3.66295	0.472169	0.85026	0	7887	Singlet	TACCCTGAGTAATGTG	CGTAT	GTTTC	B97	-3.58922	3.23765	0.0631579	singlet	1	Bundle_sheath	B97
BC:Z:GTCACGGGTTTCGTTTGGAATTCATT-Xuan_Zm_8_geno_scifi-merged	1212	549	889	0	719	2.85673	0.45297	0.733498	0	1212	Singlet	GTCACGGGTTTCGTTT	GGAAT	TCATT	M162W	-1.93234	-0.268093	0.0917293	singlet	14	Axillary_meristem	M162W
BC:Z:CAGCCTTGTTTAGACCCGACATCGGA-Xuan_Zm_8_geno_scifi-merged	5479	2653	4616	0	3320	3.52114	0.484212	0.84249	0	5479	Singlet	CAGCCTTGTTTAGACC	CGACA	TCGGA	B73	5.31299	-0.958132	0.0526316	singlet	4	Vascular_parenchyma_precursor	B73_rep1
BC:Z:TAAACCGTCCTTTGCGCTTAGGTTTC-Xuan_Zm_8_geno_scifi-merged	4645	2227	3803	0	2811	3.44886	0.47944	0.81873	0	4645	Singlet	TAAACCGTCCTTTGCG	CTTAG	GTTTC	B97	3.8934	2.76861	0.075188	singlet	12	Vascular_parenchyma_precursor	B97
BC:Z:TTGCTTAGTACTATGCTATACTCGGA-Xuan_Zm_8_geno_scifi-merged	18677	8920	15455	0	10638	4.02686	0.477593	0.827488	0	18677	Singlet	TTGCTTAGTACTATGC	TATAC	TCGGA	B73	4.08441	-0.695546	0.0842105	singlet	4	Vascular_parenchyma_precursor	B73_rep1
BC:Z:TGAGTCAAGAAAGCAGCGACAACCGG-Xuan_Zm_8_geno_scifi-merged	3720	1653	2552	0	2290	3.35984	0.444355	0.686022	0	3720	Singlet	TGAGTCAAGAAAGCAG	CGACA	ACCGG	Tzi8	-3.28039	1.69683	0.0616541	singlet	2	Bundle_sheath	Tzi8
BC:Z:TGATGCACATGCGACCAAGTCCGAGG-Xuan_Zm_8_geno_scifi-merged	1911	908	1498	0	1151	3.06108	0.475144	0.783883	0	1911	Singlet	TGATGCACATGCGACC	AAGTC	CGAGG	OH7B	-3.74258	-0.675989	0.109774	singlet	11	Ground_meristem	OH7B
BC:Z:TTGCGGGCAACGTCGCACTACCGAGG-Xuan_Zm_8_geno_scifi-merged	1528	775	1324	0	935	2.97081	0.507199	0.866492	0	1528	Singlet	TTGCGGGCAACGTCGC	ACTAC	CGAGG	OH7B	-1.47767	1.96273	0.037594	singlet	16	Procabium_phloem_precursor	OH7B
BC:Z:GGAACCCCATTAACGCCGTATAGCTT-Xuan_Zm_8_geno_scifi-merged	4951	2427	4060	0	2988	3.47538	0.490204	0.820036	0	4951	Singlet	GGAACCCCATTAACGC	CGTAT	AGCTT	B73	3.36538	1.22985	0.0526316	singlet	4	Vascular_parenchyma_precursor	B73_rep2
BC:Z:GGAACCCCATTAACGCCGTATTCGGA-Xuan_Zm_8_geno_scifi-merged	1773	884	1447	0	1083	3.03463	0.49859	0.816131	0	1773	Singlet	GGAACCCCATTAACGC	CGTAT	TCGGA	B73	3.64189	1.9091	0.106767	singlet	12	Vascular_parenchyma_precursor	B73_rep1
BC:Z:TGACTCCAGCGTAGCACTTAGCGAGG-Xuan_Zm_8_geno_scifi-merged	3074	1471	2528	0	1854	3.26811	0.47853	0.822381	0	3074	Singlet	TGACTCCAGCGTAGCA	CTTAG	CGAGG	OH7B	-3.47635	0.339985	0.0631579	singlet	11	Ground_meristem	OH7B
BC:Z:GCAAAGGTCTTGTCGCAGATGTCGGA-Xuan_Zm_8_geno_scifi-merged	2131	1063	1755	0	1308	3.11661	0.498827	0.823557	0	2131	Singlet	GCAAAGGTCTTGTCGC	AGATG	TCGGA	B73	-1.56648	-2.486	0.043609	singlet	9	Guard_cell_precursor	B73_rep1
BC:Z:AATACGCTCCATTGAGCTTAGACCGG-Xuan_Zm_8_geno_scifi-merged	12524	6079	10152	0	7426	3.87075	0.485388	0.810604	0	12524	Singlet	AATACGCTCCATTGAG	CTTAG	ACCGG	Tzi8	3.61702	0.45174	0.0917293	singlet	3	Vascular_parenchyma_precursor	Tzi8
BC:Z:GCGCATGGTGGTTCTATATACCGAGG-Xuan_Zm_8_geno_scifi-merged	7530	3765	6096	0	4496	3.65283	0.5	0.809562	0	7530	Singlet	GCGCATGGTGGTTCTA	TATAC	CGAGG	OH7B	3.86171	-3.65048	0.0902256	singlet	10	Epidermis	OH7B
BC:Z:GCAGATTCAGCGCGTTTATACTCATT-Xuan_Zm_8_geno_scifi-merged	5609	2626	4300	0	3416	3.53352	0.468176	0.766625	0	5609	Singlet	GCAGATTCAGCGCGTT	TATAC	TCATT	M162W	-1.72154	-0.0535753	0.0691729	singlet	3	Vascular_parenchyma_precursor	M162W
BC:Z:GCAGATTCAGCGCGTTTCGCTGTTTC-Xuan_Zm_8_geno_scifi-merged	1391	697	1072	0	879	2.94399	0.501078	0.770669	0	1391	Singlet	GCAGATTCAGCGCGTT	TCGCT	GTTTC	B97	-1.78727	1.87006	0.105263	singlet	16	Procabium_phloem_precursor	B97
BC:Z:GGAACCCAGTGGGACTGGAATACCGG-Xuan_Zm_8_geno_scifi-merged	15887	7179	12356	2	9271	3.96713	0.451879	0.777743	0.000125889	15887	Singlet	GGAACCCAGTGGGACT	GGAAT	ACCGG	Tzi8	3.32244	0.352481	0.0932331	singlet	3	Vascular_parenchyma_precursor	Tzi8
BC:Z:ATGTACGTCTTCAGAGCGTATTCGGA-Xuan_Zm_8_geno_scifi-merged	3423	1638	2940	0	2079	3.31785	0.478528	0.858896	0	3423	Singlet	ATGTACGTCTTCAGAG	CGTAT	TCGGA	B73	5.02476	0.0151167	0.0556391	singlet	13	Vascular_parenchyma_precursor	B73_rep1
BC:Z:ACAAACCCATTCACCCAGTAATCGGA-Xuan_Zm_8_geno_scifi-merged	1099	531	887	0	673	2.82802	0.483167	0.807097	0	1099	Singlet	ACAAACCCATTCACCC	AGTAA	TCGGA	B73	0.0843628	1.4194	0.081203	singlet	7	Xylem	B73_rep1
BC:Z:AACGGGATCAGGATCTAGTAATCGGA-Xuan_Zm_8_geno_scifi-merged	1663	820	1393	0	995	2.99782	0.493085	0.837643	0	1663	Singlet	AACGGGATCAGGATCT	AGTAA	TCGGA	B73	-4.70021	-2.92593	0.0661654	singlet	8	Mesophyll	B73_rep1
BC:Z:TATCGAGGTAGATTAGAGTAAACCGG-Xuan_Zm_8_geno_scifi-merged	1627	712	1087	0	994	2.99739	0.437615	0.668101	0	1627	Singlet	TATCGAGGTAGATTAG	AGTAA	ACCGG	Tzi8	-1.38265	-2.64277	0.111278	singlet	9	Guard_cell_precursor	Tzi8
BC:Z:CAGCCTTCATTACTCTCGACATCGGA-Xuan_Zm_8_geno_scifi-merged	8978	4128	6909	0	5271	3.72189	0.459791	0.769548	0	8978	Singlet	CAGCCTTCATTACTCT	CGACA	TCGGA	B73	3.52373	-3.49555	0.0842105	singlet	4	Vascular_parenchyma_precursor	B73_rep1
BC:Z:CCGCATTGTGATGCGACGTATGTTTC-Xuan_Zm_8_geno_scifi-merged	1534	694	1287	0	939	2.97267	0.452412	0.838983	0	1534	Singlet	CCGCATTGTGATGCGA	CGTAT	GTTTC	B97	-3.34605	1.80044	0.043609	singlet	2	Bundle_sheath	B97
BC:Z:TACTGCCCATATACGCACTACTCGGA-Xuan_Zm_8_geno_scifi-merged	1945	878	1500	0	1169	3.06781	0.451414	0.771208	0	1945	Singlet	TACTGCCCATATACGC	ACTAC	TCGGA	B73	-4.48921	-1.19405	0.0360902	singlet	11	Ground_meristem	B73_rep1
BC:Z:TAGTCCCGTGCCGGTTAATTGTCATT-Xuan_Zm_8_geno_scifi-merged	1092	488	820	0	667	2.82413	0.446886	0.750916	0	1092	Singlet	TAGTCCCGTGCCGGTT	AATTG	TCATT	M162W	-4.48016	-2.23376	0.0601504	singlet	3	Vascular_parenchyma_precursor	M162W
BC:Z:CTGTATTGTGCATTCAAGATGTCGGA-Xuan_Zm_8_geno_scifi-merged	3811	1722	2923	0	2305	3.36267	0.45185	0.76699	0	3811	Singlet	CTGTATTGTGCATTCA	AGATG	TCGGA	B73	-0.00798392	1.28307	0.0857143	singlet	7	Xylem	B73_rep1
BC:Z:CAGCTGGCAATTAGGATCGCTTCGGA-Xuan_Zm_8_geno_scifi-merged	2775	1415	2162	0	1681	3.22557	0.50991	0.779099	0	2775	Singlet	CAGCTGGCAATTAGGA	TCGCT	TCGGA	B73	-1.39329	-2.50853	0.0661654	singlet	9	Guard_cell_precursor	B73_rep1
BC:Z:ACTGCAAAGAGGTGGGCGACATCATT-Xuan_Zm_8_geno_scifi-merged	1468	707	1206	0	918	2.96284	0.481608	0.821526	0	1468	Singlet	ACTGCAAAGAGGTGGG	CGACA	TCATT	M162W	-4.96607	-3.32566	0.0736842	singlet	8	Mesophyll	M162W
BC:Z:TATGTTCCAATCACTGCTTAGACCGG-Xuan_Zm_8_geno_scifi-merged	3251	1593	2656	0	1970	3.29447	0.490003	0.816979	0	3251	Singlet	TATGTTCCAATCACTG	CTTAG	ACCGG	Tzi8	-2.18486	3.72503	0.0616541	singlet	3	Vascular_parenchyma_precursor	Tzi8
BC:Z:ACAATCGTCGTCTAGAAGTAAGTTTC-Xuan_Zm_8_geno_scifi-merged	2080	928	1620	0	1259	3.10003	0.446154	0.778846	0	2080	Singlet	ACAATCGTCGTCTAGA	AGTAA	GTTTC	B97	-2.89618	3.70223	0.0977444	singlet	1	Bundle_sheath	B97
BC:Z:GGAACCCAGCTCGTTAAGTAATCGGA-Xuan_Zm_8_geno_scifi-merged	1418	655	1044	0	883	2.94596	0.461918	0.736248	0	1418	Singlet	GGAACCCAGCTCGTTA	AGTAA	TCGGA	B73	-1.29408	0.642184	0.0977444	singlet	17	Axillary_meristem	B73_rep1
BC:Z:GGAACCCAGCTCGTTATATACTCGGA-Xuan_Zm_8_geno_scifi-merged	2080	946	1519	0	1298	3.11327	0.454808	0.730288	0	2080	Singlet	GGAACCCAGCTCGTTA	TATAC	TCGGA	B73	-3.44978	2.03193	0.0421053	singlet	2	Bundle_sheath	B73_rep1
BC:Z:GATGATCTCTTATCACCGACAACCGG-Xuan_Zm_8_geno_scifi-merged	1572	750	1298	0	960	2.98227	0.477099	0.8257	0	1572	Singlet	GATGATCTCTTATCAC	CGACA	ACCGG	Tzi8	-5.08409	-2.9332	0.0345865	singlet	8	Mesophyll	Tzi8
BC:Z:AGCTGATCACACACATTATACTCGGA-Xuan_Zm_8_geno_scifi-merged	8526	3852	6172	0	5046	3.70295	0.451795	0.723903	0	8526	Singlet	AGCTGATCACACACAT	TATAC	TCGGA	B73	-2.12639	-2.3128	0.108271	singlet	11	Ground_meristem	B73_rep1
BC:Z:TACGCCTGTGGCCTTGAGTAAGTTTC-Xuan_Zm_8_geno_scifi-merged	2037	1017	1762	0	1252	3.0976	0.499264	0.864998	0	2037	Singlet	TACGCCTGTGGCCTTG	AGTAA	GTTTC	B97	5.16071	0.259623	0.0466165	singlet	13	Vascular_parenchyma_precursor	B97
BC:Z:GAGTGAGAGCAGAATTCGACATCGGA-Xuan_Zm_8_geno_scifi-merged	19766	9520	16610	0	11172	4.04813	0.481635	0.840332	0	19766	Singlet	GAGTGAGAGCAGAATT	CGACA	TCGGA	B73	3.89293	-2.27147	0.0992481	singlet	4	Vascular_parenchyma_precursor	B73_rep1
BC:Z:TAGGAGGCACTAGGAGAGATGTCGGA-Xuan_Zm_8_geno_scifi-merged	16223	7218	11781	2	9486	3.97708	0.444924	0.726191	0.000123282	16223	Singlet	TAGGAGGCACTAGGAG	AGATG	TCGGA	B73	-0.974671	-0.325138	0.0857143	singlet	3	Vascular_parenchyma_precursor	B73_rep1
BC:Z:AAATGAGGTTCCCAAAAAGTCTCGGA-Xuan_Zm_8_geno_scifi-merged	3084	1491	2611	0	1824	3.26102	0.483463	0.846628	0	3084	Singlet	AAATGAGGTTCCCAAA	AAGTC	TCGGA	B73	1.6506	1.77419	0.0646617	singlet	6	Vascular_parenchyma	B73_rep1
BC:Z:CACTGAAAGGTACATATCGCTTCATT-Xuan_Zm_8_geno_scifi-merged	7183	3166	5546	0	4285	3.63195	0.440763	0.772101	0	7183	Singlet	CACTGAAAGGTACATA	TCGCT	TCATT	M162W	-3.26886	3.59055	0.0631579	singlet	1	Bundle_sheath	M162W
BC:Z:CGCAGGTTCCCGAAGCCGACAACCGG-Xuan_Zm_8_geno_scifi-merged	13873	6200	10092	0	8191	3.91334	0.446911	0.727456	0	13873	Singlet	CGCAGGTTCCCGAAGC	CGACA	ACCGG	Tzi8	-1.21241	-0.555228	0.0571429	singlet	3	Vascular_parenchyma_precursor	Tzi8
BC:Z:ACTTCCGCACAGGTAGAATTGAGCTT-Xuan_Zm_8_geno_scifi-merged	1047	493	834	0	633	2.8014	0.470869	0.796562	0	1047	Singlet	ACTTCCGCACAGGTAG	AATTG	AGCTT	B73	-4.65936	-1.68059	0.0661654	singlet	11	Ground_meristem	B73_rep2
BC:Z:TAGCCGGGTCCCGTGACGTATTCGGA-Xuan_Zm_8_geno_scifi-merged	1794	892	1526	0	1102	3.04218	0.497213	0.850613	0	1794	Singlet	TAGCCGGGTCCCGTGA	CGTAT	TCGGA	B73	0.177433	-3.21778	0.0496241	singlet	9	Guard_cell_precursor	B73_rep1
BC:Z:CTCAACCGTGATGCGAGGAATGTTTC-Xuan_Zm_8_geno_scifi-merged	4238	2066	3590	0	2533	3.40364	0.487494	0.847098	0	4238	Singlet	CTCAACCGTGATGCGA	GGAAT	GTTTC	B97	4.0843	1.8453	0.0796992	singlet	12	Vascular_parenchyma_precursor	B97
BC:Z:CGAGTTACATCATGTGAGTAAACTAA-Xuan_Zm_8_geno_scifi-merged	15502	7202	12433	0	8997	3.9541	0.464585	0.802026	0	15502	Singlet	CGAGTTACATCATGTG	AGTAA	ACTAA	Ky21	-0.928671	0.27608	0.0827068	singlet	3	Vascular_parenchyma_precursor	Ky21
BC:Z:GCTCCTATCGCGATGCAAGTCCGAGG-Xuan_Zm_8_geno_scifi-merged	1429	681	1166	0	863	2.93601	0.476557	0.815955	0	1429	Singlet	GCTCCTATCGCGATGC	AAGTC	CGAGG	OH7B	1.09316	1.89139	0.109774	singlet	3	Vascular_parenchyma_precursor	OH7B
BC:Z:TTGCAGACAATAGCGGAGTAATCGGA-Xuan_Zm_8_geno_scifi-merged	1008	497	850	0	618	2.79099	0.493056	0.843254	0	1008	Singlet	TTGCAGACAATAGCGG	AGTAA	TCGGA	B73	1.72561	2.48067	0.0827068	singlet	6	Vascular_parenchyma	B73_rep1
BC:Z:AATGGAAAGTATCTGCAAGTCTCGGA-Xuan_Zm_8_geno_scifi-merged	6621	2777	4616	0	3980	3.59988	0.419423	0.697176	0	6621	Singlet	AATGGAAAGTATCTGC	AAGTC	TCGGA	B73	-1.99672	4.70927	0.075188	singlet	1	Bundle_sheath	B73_rep1
BC:Z:TCGTTCGGTTAAGGGCAAGTCTCGGA-Xuan_Zm_8_geno_scifi-merged	3432	1634	2869	0	2081	3.31827	0.476107	0.835956	0	3432	Singlet	TCGTTCGGTTAAGGGC	AAGTC	TCGGA	B73	-2.26285	1.68989	0.0451128	singlet	16	Procabium_phloem_precursor	B73_rep1
BC:Z:CAACGTAAGACTTCCAAAGTCCGAGG-Xuan_Zm_8_geno_scifi-merged	11419	5476	9607	0	6657	3.82328	0.479552	0.841317	0	11419	Singlet	CAACGTAAGACTTCCA	AAGTC	CGAGG	OH7B	3.67611	-3.26752	0.100752	singlet	10	Epidermis	OH7B
BC:Z:TATGTTCCACTCCTCACGCGACGAGG-Xuan_Zm_8_geno_scifi-merged	7500	3714	6085	2	4490	3.65225	0.4952	0.811333	0.000266667	7500	Singlet	TATGTTCCACTCCTCA	CGCGA	CGAGG	OH7B	-0.857732	-0.706234	0.0977444	singlet	3	Vascular_parenchyma_precursor	OH7B
BC:Z:AGGCCTGTCCCAATGACTTAGTCGGA-Xuan_Zm_8_geno_scifi-merged	48313	23221	40755	2	24750	4.39358	0.480637	0.843562	4.13967e-05	48313	Singlet	AGGCCTGTCCCAATGA	CTTAG	TCGGA	B73	4.26652	-2.18459	0.0902256	singlet	4	Vascular_parenchyma_precursor	B73_rep1
BC:Z:GATCGTACACAGTAGGAATTGCGAGG-Xuan_Zm_8_geno_scifi-merged	2211	1053	1722	0	1321	3.1209	0.476255	0.778833	0	2211	Singlet	GATCGTACACAGTAGG	AATTG	CGAGG	OH7B	-1.4958	0.693376	0.0766917	singlet	14	Axillary_meristem	OH7B
BC:Z:CACGTTCAGTCGAGCACGTATTCGGA-Xuan_Zm_8_geno_scifi-merged	3516	1744	2871	0	2068	3.31555	0.496018	0.816553	0	3516	Singlet	CACGTTCAGTCGAGCA	CGTAT	TCGGA	B73	-5.01976	-2.05654	0.0887218	singlet	8	Mesophyll	B73_rep1
BC:Z:TTACTCATCCTATCCGAGTAAAGCTT-Xuan_Zm_8_geno_scifi-merged	1339	604	1031	0	812	2.90956	0.451083	0.769978	0	1339	Singlet	TTACTCATCCTATCCG	AGTAA	AGCTT	B73	-1.42447	-2.20491	0.0556391	singlet	9	Guard_cell_precursor	B73_rep2
BC:Z:CCCACATAGAGCGAAAACTACTCATT-Xuan_Zm_8_geno_scifi-merged	1061	459	819	0	664	2.82217	0.432611	0.771913	0	1061	Singlet	CCCACATAGAGCGAAA	ACTAC	TCATT	M162W	3.99928	-2.36799	0.0842105	singlet	3	Vascular_parenchyma_precursor	M162W
BC:Z:CACCTTGAGCCTGGTCAGATGCGAGG-Xuan_Zm_8_geno_scifi-merged	2442	1126	1968	0	1492	3.17377	0.461097	0.805897	0	2442	Singlet	CACCTTGAGCCTGGTC	AGATG	CGAGG	OH7B	-2.73902	-1.8125	0.0887218	singlet	11	Ground_meristem	OH7B
BC:Z:GGAACTTGTCATGAGGAAGTCTCGGA-Xuan_Zm_8_geno_scifi-merged	1420	659	1148	0	898	2.95328	0.464085	0.808451	0	1420	Singlet	GGAACTTGTCATGAGG	AAGTC	TCGGA	B73	-3.20437	-1.00095	0.0766917	singlet	4	Vascular_parenchyma_precursor	B73_rep1
BC:Z:TTGTTGTGTTCCAATGTATACGTTTC-Xuan_Zm_8_geno_scifi-merged	6183	3003	5063	0	3682	3.56608	0.485687	0.818858	0	6183	Singlet	TTGTTGTGTTCCAATG	TATAC	GTTTC	B97	3.96479	1.29083	0.0661654	singlet	3	Vascular_parenchyma_precursor	B97
BC:Z:CTCTACGCAAATGCTCCGACACGAGG-Xuan_Zm_8_geno_scifi-merged	2056	945	1644	0	1259	3.10003	0.45963	0.799611	0	2056	Singlet	CTCTACGCAAATGCTC	CGACA	CGAGG	OH7B	5.41536	-0.407345	0.0586466	singlet	13	Vascular_parenchyma_precursor	OH7B
BC:Z:GTAGTACGTAGAGAGAAAGTCTCATT-Xuan_Zm_8_geno_scifi-merged	1527	732	1184	0	933	2.96988	0.479371	0.775377	0	1527	Singlet	GTAGTACGTAGAGAGA	AAGTC	TCATT	M162W	-1.16162	-2.70787	0.0511278	singlet	9	Guard_cell_precursor	M162W
BC:Z:ACAATCGGTTCCCGGATATACACCGG-Xuan_Zm_8_geno_scifi-merged	2745	1139	2011	0	1690	3.22789	0.414936	0.732605	0	2745	Singlet	ACAATCGGTTCCCGGA	TATAC	ACCGG	Tzi8	-3.56009	-0.922273	0.0661654	singlet	11	Ground_meristem	Tzi8
BC:Z:CACAGATTCAGAGTGGCGTATACTAA-Xuan_Zm_8_geno_scifi-merged	32528	15668	27743	0	17561	4.24455	0.481677	0.852896	0	32528	Singlet	CACAGATTCAGAGTGG	CGTAT	ACTAA	Ky21	-0.55099	-0.887619	0.100752	singlet	3	Vascular_parenchyma_precursor	Ky21
BC:Z:GAGGATGGTTACTTTCTATACACCGG-Xuan_Zm_8_geno_scifi-merged	4886	2319	3700	0	2945	3.46909	0.474621	0.757266	0	4886	Singlet	GAGGATGGTTACTTTC	TATAC	ACCGG	Tzi8	-0.619334	2.53154	0.114286	singlet	16	Procabium_phloem_precursor	Tzi8
BC:Z:GTGCACGCAGATTTGCAAGTCAGCTT-Xuan_Zm_8_geno_scifi-merged	1252	585	1025	0	774	2.88874	0.467252	0.81869	0	1252	Singlet	GTGCACGCAGATTTGC	AAGTC	AGCTT	B73	-4.55838	-1.42664	0.0646617	singlet	11	Ground_meristem	B73_rep2
BC:Z:CTTCCAGAGCGCATTTAGATGCGAGG-Xuan_Zm_8_geno_scifi-merged	5410	2271	3778	0	3291	3.51733	0.419778	0.698336	0	5410	Singlet	CTTCCAGAGCGCATTT	AGATG	CGAGG	OH7B	1.25448	2.70547	0.0781955	singlet	6	Vascular_parenchyma	OH7B
BC:Z:CACCTTGCACACACCGAATTGTCGGA-Xuan_Zm_8_geno_scifi-merged	3256	1636	2765	0	1950	3.29003	0.502457	0.849201	0	3256	Singlet	CACCTTGCACACACCG	AATTG	TCGGA	B73	-1.24939	-2.66152	0.0421053	singlet	9	Guard_cell_precursor	B73_rep1
BC:Z:ACAGACTTCAGGGTTTGGAATCGAGG-Xuan_Zm_8_geno_scifi-merged	1216	500	907	0	734	2.8657	0.411184	0.745888	0	1216	Singlet	ACAGACTTCAGGGTTT	GGAAT	CGAGG	OH7B	-4.83757	-2.80809	0.0932331	singlet	8	Mesophyll	OH7B
BC:Z:CACATGATCTGTAGACACTACACCGG-Xuan_Zm_8_geno_scifi-merged	1131	567	961	0	674	2.82866	0.501326	0.849691	0	1131	Singlet	CACATGATCTGTAGAC	ACTAC	ACCGG	Tzi8	3.27239	-1.39328	0.0917293	singlet	10	Epidermis	Tzi8
BC:Z:AGTTACGGTCAGGTGACTTAGACCGG-Xuan_Zm_8_geno_scifi-merged	1081	547	794	0	661	2.8202	0.506013	0.734505	0	1081	Singlet	AGTTACGGTCAGGTGA	CTTAG	ACCGG	Tzi8	-2.3065	2.07673	0.0616541	singlet	2	Bundle_sheath	Tzi8
BC:Z:TACTGCCTCGAGCGCTCTTAGACTAA-Xuan_Zm_8_geno_scifi-merged	2737	1328	2167	0	1657	3.21932	0.485203	0.791743	0	2737	Singlet	TACTGCCTCGAGCGCT	CTTAG	ACTAA	Ky21	4.12851	2.06663	0.0827068	singlet	12	Vascular_parenchyma_precursor	Ky21
BC:Z:TATCGAGCAGAGCCAAAATTGTCGGA-Xuan_Zm_8_geno_scifi-merged	7565	3528	5814	0	4519	3.65504	0.466358	0.768539	0	7565	Singlet	TATCGAGCAGAGCCAA	AATTG	TCGGA	B73	4.441	-2.9464	0.075188	singlet	10	Epidermis	B73_rep1
BC:Z:TATCGAGCAGAGCCAAACTACTCGGA-Xuan_Zm_8_geno_scifi-merged	2217	924	1474	0	1375	3.1383	0.416779	0.664862	0	2217	Singlet	TATCGAGCAGAGCCAA	ACTAC	TCGGA	B73	0.560791	-3.09518	0.0616541	singlet	9	Guard_cell_precursor	B73_rep1
BC:Z:AAATGAGCAACGTACTAGATGTCGGA-Xuan_Zm_8_geno_scifi-merged	11325	5423	9492	0	6530	3.81491	0.478852	0.838146	0	11325	Singlet	AAATGAGCAACGTACT	AGATG	TCGGA	B73	1.81268	1.59621	0.0977444	singlet	6	Vascular_parenchyma	B73_rep1
BC:Z:AAGATAGCAACTCGTATATACTCGGA-Xuan_Zm_8_geno_scifi-merged	4272	1915	3096	0	2582	3.41196	0.448268	0.724719	0	4272	Singlet	AAGATAGCAACTCGTA	TATAC	TCGGA	B73	-5.17434	-2.42043	0.0706767	singlet	8	Mesophyll	B73_rep1
BC:Z:GCCAGCAAGTGCCCTGACTACTCGGA-Xuan_Zm_8_geno_scifi-merged	1362	628	1105	0	849	2.92891	0.461087	0.811307	0	1362	Singlet	GCCAGCAAGTGCCCTG	ACTAC	TCGGA	B73	2.38071	-0.179263	0.087218	singlet	3	Vascular_parenchyma_precursor	B73_rep1
BC:Z:AGGCCTGTCTCATCCGCGTATTCATT-Xuan_Zm_8_geno_scifi-merged	1577	764	1343	0	979	2.99078	0.484464	0.851617	0	1577	Singlet	AGGCCTGTCTCATCCG	CGTAT	TCATT	M162W	-3.04306	2.38752	0.0902256	singlet	2	Bundle_sheath	M162W
BC:Z:GCATTGAAGGCAAGGGAAGTCTCGGA-Xuan_Zm_8_geno_scifi-merged	18406	8902	15255	0	10399	4.01699	0.483647	0.828806	0	18406	Singlet	GCATTGAAGGCAAGGG	AAGTC	TCGGA	B73	-0.899245	-1.90219	0.0676692	singlet	4	Vascular_parenchyma_precursor	B73_rep1
BC:Z:TGTACAGGTTTCCTATACTACTCGGA-Xuan_Zm_8_geno_scifi-merged	2683	1311	2127	4	1616	3.20844	0.488632	0.792769	0.00149087	2683	Singlet	TGTACAGGTTTCCTAT	ACTAC	TCGGA	B73	3.71598	2.85226	0.0706767	singlet	12	Vascular_parenchyma_precursor	B73_rep1
BC:Z:TAGCACAAGGGTCTGAGGAATGCTCC-Xuan_Zm_8_geno_scifi-merged	2423	1113	1812	0	1483	3.17114	0.459348	0.747833	0	2423	Singlet	TAGCACAAGGGTCTGA	GGAAT	GCTCC	Mo18W	2.5165	-0.0177985	0.0586466	singlet	3	Vascular_parenchyma_precursor	Mo18W
BC:Z:ATAGGCTGTGATTCCATCGCTACCGG-Xuan_Zm_8_geno_scifi-merged	2343	1131	1755	0	1450	3.16137	0.482714	0.74904	0	2343	Singlet	ATAGGCTGTGATTCCA	TCGCT	ACCGG	Tzi8	-0.343373	1.34839	0.108271	singlet	7	Xylem	Tzi8
BC:Z:GTGTGATTCATCATGGCGTATCGAGG-Xuan_Zm_8_geno_scifi-merged	2565	1190	2185	0	1571	3.19618	0.463938	0.851852	0	2565	Singlet	GTGTGATTCATCATGG	CGTAT	CGAGG	OH7B	-2.15518	-0.955735	0.0736842	singlet	14	Axillary_meristem	OH7B
BC:Z:TTACTCATCCTTACGCAGATGGTTTC-Xuan_Zm_8_geno_scifi-merged	3073	1478	2332	0	1887	3.27577	0.480963	0.758868	0	3073	Singlet	TTACTCATCCTTACGC	AGATG	GTTTC	B97	-1.02298	0.808414	0.0857143	singlet	3	Vascular_parenchyma_precursor	B97
BC:Z:AGTGCGCTCAGTACACCTTAGCGAGG-Xuan_Zm_8_geno_scifi-merged	6173	2779	4601	0	3730	3.57171	0.450186	0.745343	0	6173	Singlet	AGTGCGCTCAGTACAC	CTTAG	CGAGG	OH7B	2.13876	2.71517	0.0721805	singlet	6	Vascular_parenchyma	OH7B
BC:Z:AAAGGATCATAGAATGCGACACGAGG-Xuan_Zm_8_geno_scifi-merged	1664	829	1431	0	1026	3.01115	0.498197	0.859976	0	1664	Singlet	AAAGGATCATAGAATG	CGACA	CGAGG	OH7B	-4.60766	-3.11809	0.0766917	singlet	3	Vascular_parenchyma_precursor	OH7B
BC:Z:AATGGCTAGCTAACAACTTAGCGAGG-Xuan_Zm_8_geno_scifi-merged	4157	1924	3373	0	2489	3.39602	0.462834	0.811402	0	4157	Singlet	AATGGCTAGCTAACAA	CTTAG	CGAGG	OH7B	3.65542	3.09412	0.081203	singlet	12	Vascular_parenchyma_precursor	OH7B
BC:Z:AGCCGCAAGAGCTGTGCTTAGTCATT-Xuan_Zm_8_geno_scifi-merged	9733	4459	7745	0	5821	3.765	0.458132	0.795746	0	9733	Singlet	AGCCGCAAGAGCTGTG	CTTAG	TCATT	M162W	-1.20013	-1.40673	0.0541353	singlet	3	Vascular_parenchyma_precursor	M162W
BC:Z:AGCTGATGTAACGGACAGTAAGCTCC-Xuan_Zm_8_geno_scifi-merged	1203	572	967	0	722	2.85854	0.475478	0.803824	0	1203	Singlet	AGCTGATGTAACGGAC	AGTAA	GCTCC	Mo18W	4.85134	0.801223	0.0496241	singlet	13	Vascular_parenchyma_precursor	Mo18W
BC:Z:AGTGTACCAGCCACGTCGACACGAGG-Xuan_Zm_8_geno_scifi-merged	12372	5940	10157	0	7295	3.86303	0.480116	0.820967	0	12372	Singlet	AGTGTACCAGCCACGT	CGACA	CGAGG	OH7B	3.73755	-2.93641	0.102256	singlet	3	Vascular_parenchyma_precursor	OH7B
BC:Z:ATAGTCGAGCCATCATCTTAGCGAGG-Xuan_Zm_8_geno_scifi-merged	10575	5135	9087	0	6176	3.79071	0.485579	0.859291	0	10575	Singlet	ATAGTCGAGCCATCAT	CTTAG	CGAGG	OH7B	0.541831	-1.17895	0.0616541	singlet	5	Axillary_meristem	OH7B
BC:Z:CAACGGCAGTTAGCAAAGTAATCATT-Xuan_Zm_8_geno_scifi-merged	2063	1016	1525	0	1260	3.10037	0.492487	0.739215	0	2063	Singlet	CAACGGCAGTTAGCAA	AGTAA	TCATT	M162W	-0.94651	1.56723	0.112782	singlet	16	Procabium_phloem_precursor	M162W
BC:Z:CAAGGCCCACCACCAGCGTATTCATT-Xuan_Zm_8_geno_scifi-merged	1890	917	1492	0	1163	3.06558	0.485185	0.789418	0	1890	Singlet	CAAGGCCCACCACCAG	CGTAT	TCATT	M162W	-4.20093	-0.790394	0.0661654	singlet	11	Ground_meristem	M162W
BC:Z:CAGCTAACAAGTTGCTCTTAGCGAGG-Xuan_Zm_8_geno_scifi-merged	2686	1246	2217	0	1627	3.21139	0.463887	0.825391	0	2686	Singlet	CAGCTAACAAGTTGCT	CTTAG	CGAGG	OH7B	5.30748	-1.234	0.0646617	singlet	13	Vascular_parenchyma_precursor	OH7B
BC:Z:CAGTATGTCACCGCGATCGCTTCGGA-Xuan_Zm_8_geno_scifi-merged	1227	558	1068	0	756	2.87852	0.454768	0.870416	0	1227	Singlet	CAGTATGTCACCGCGA	TCGCT	TCGGA	B73	5.31173	-0.223765	0.0541353	singlet	13	Vascular_parenchyma_precursor	B73_rep1
BC:Z:CCAATGATCATCGCAAAATTGCGAGG-Xuan_Zm_8_geno_scifi-merged	2961	1415	2519	0	1813	3.2584	0.477879	0.850726	0	2961	Singlet	CCAATGATCATCGCAA	AATTG	CGAGG	OH7B	0.410078	-0.733078	0.0842105	singlet	5	Axillary_meristem	OH7B
BC:Z:CCAGAATCAGTTAAAGAAGTCTCGGA-Xuan_Zm_8_geno_scifi-merged	1020	497	788	0	625	2.79588	0.487255	0.772549	0	1020	Singlet	CCAGAATCAGTTAAAG	AAGTC	TCGGA	B73	2.78533	0.0619542	0.0661654	singlet	3	Vascular_parenchyma_precursor	B73_rep1
BC:Z:CCTAAAGGTAGTGATACTTAGCGAGG-Xuan_Zm_8_geno_scifi-merged	1139	541	1000	0	715	2.85431	0.474978	0.877963	0	1139	Singlet	CCTAAAGGTAGTGATA	CTTAG	CGAGG	OH7B	-3.94581	-0.4267	0.0887218	singlet	11	Ground_meristem	OH7B
BC:Z:CGGTGCAAGTAATGTGAAGTCTCATT-Xuan_Zm_8_geno_scifi-merged	1811	905	1434	0	1110	3.04532	0.499724	0.791828	0	1811	Singlet	CGGTGCAAGTAATGTG	AAGTC	TCATT	M162W	-1.06532	-2.82345	0.0766917	singlet	9	Guard_cell_precursor	M162W
BC:Z:CTCAGAATCGCCGAACGGAATTCATT-Xuan_Zm_8_geno_scifi-merged	1405	720	1203	0	865	2.93702	0.512456	0.856228	0	1405	Singlet	CTCAGAATCGCCGAAC	GGAAT	TCATT	M162W	-0.854984	1.33558	0.0721805	singlet	7	Xylem	M162W
BC:Z:CTCAGCTGTACGCCCATCGCTTCATT-Xuan_Zm_8_geno_scifi-merged	1153	504	891	0	698	2.84386	0.437121	0.772767	0	1153	Singlet	CTCAGCTGTACGCCCA	TCGCT	TCATT	M162W	-4.71122	-1.06539	0.081203	singlet	11	Ground_meristem	M162W
BC:Z:GAAATGAAGTGAAACTCTTAGCGAGG-Xuan_Zm_8_geno_scifi-merged	2595	1279	2207	0	1580	3.19866	0.492871	0.850482	0	2595	Singlet	GAAATGAAGTGAAACT	CTTAG	CGAGG	OH7B	-0.555543	-2.86531	0.0646617	singlet	9	Guard_cell_precursor	OH7B
BC:Z:GAACCTATCGCACCTTCGACAGCTCC-Xuan_Zm_8_geno_scifi-merged	1194	527	924	0	728	2.86213	0.441374	0.773869	0	1194	Singlet	GAACCTATCGCACCTT	CGACA	GCTCC	Mo18W	-1.37661	-2.56729	0.0932331	singlet	9	Guard_cell_precursor	Mo18W
BC:Z:GAACTTGGTACCAAGGAATTGACTAA-Xuan_Zm_8_geno_scifi-merged	1294	617	1065	0	786	2.89542	0.476816	0.823029	0	1294	Singlet	GAACTTGGTACCAAGG	AATTG	ACTAA	Ky21	-3.20903	-0.759036	0.0736842	singlet	14	Axillary_meristem	Ky21
BC:Z:GAGACTTTCGATCTTTTATACTCATT-Xuan_Zm_8_geno_scifi-merged	3140	1375	2288	0	1908	3.28058	0.437898	0.728662	0	3140	Singlet	GAGACTTTCGATCTTT	TATAC	TCATT	M162W	0.716645	-3.09482	0.0631579	singlet	9	Guard_cell_precursor	M162W
BC:Z:GCACCTTAGAGCGAAAGGAATCGAGG-Xuan_Zm_8_geno_scifi-merged	7221	3329	6074	0	4323	3.63579	0.461016	0.841158	0	7221	Singlet	GCACCTTAGAGCGAAA	GGAAT	CGAGG	OH7B	3.85597	-2.97368	0.0631579	singlet	9	Guard_cell_precursor	OH7B
BC:Z:GCATGATTCTTTATCGCTTAGTCATT-Xuan_Zm_8_geno_scifi-merged	5948	2738	4647	0	3605	3.55691	0.460323	0.781271	0	5948	Singlet	GCATGATTCTTTATCG	CTTAG	TCATT	M162W	-4.91638	-2.40337	0.0887218	singlet	8	Mesophyll	M162W
BC:Z:GCCCGAAAGTAACATGAAGTCGCTCC-Xuan_Zm_8_geno_scifi-merged	3352	1617	2689	0	2044	3.31048	0.482399	0.802208	0	3352	Singlet	GCCCGAAAGTAACATG	AAGTC	GCTCC	Mo18W	-2.84826	2.4553	0.081203	singlet	3	Vascular_parenchyma_precursor	Mo18W
BC:Z:GCCTACTAGGTTGTGGCTTAGCGAGG-Xuan_Zm_8_geno_scifi-merged	1423	630	987	0	858	2.93349	0.442727	0.693605	0	1423	Singlet	GCCTACTAGGTTGTGG	CTTAG	CGAGG	OH7B	-1.98375	1.63644	0.0541353	singlet	16	Procabium_phloem_precursor	OH7B
BC:Z:GCGCCAACACACTAGTCGTATTCGGA-Xuan_Zm_8_geno_scifi-merged	3756	1783	3114	0	2274	3.35679	0.474707	0.829073	0	3756	Singlet	GCGCCAACACACTAGT	CGTAT	TCGGA	B73	-2.81438	2.39432	0.0406015	singlet	2	Bundle_sheath	B73_rep1
BC:Z:GCGGAAAGTGCCAAGATCGCTCGAGG-Xuan_Zm_8_geno_scifi-merged	5564	2797	4575	0	3337	3.52336	0.502696	0.82225	0	5564	Singlet	GCGGAAAGTGCCAAGA	TCGCT	CGAGG	OH7B	4.29363	-3.58597	0.0977444	singlet	10	Epidermis	OH7B
BC:Z:GCTTTCGAGTGTCACTAAGTCCGAGG-Xuan_Zm_8_geno_scifi-merged	11141	5422	9313	0	6548	3.81611	0.486671	0.835921	0	11141	Singlet	GCTTTCGAGTGTCACT	AAGTC	CGAGG	OH7B	-0.356039	-1.8415	0.112782	singlet	3	Vascular_parenchyma_precursor	OH7B
BC:Z:GGACACCGTGCTGAAGCGTATTCATT-Xuan_Zm_8_geno_scifi-merged	3397	1678	2710	0	2064	3.31471	0.493965	0.797763	0	3397	Singlet	GGACACCGTGCTGAAG	CGTAT	TCATT	M162W	-4.48652	-1.66329	0.0646617	singlet	11	Ground_meristem	M162W
BC:Z:GGATGAGGTACATGGGCGTATCGAGG-Xuan_Zm_8_geno_scifi-merged	2944	1496	2578	0	1756	3.24452	0.508152	0.875679	0	2944	Singlet	GGATGAGGTACATGGG	CGTAT	CGAGG	OH7B	-3.36986	-0.218568	0.112782	singlet	11	Ground_meristem	OH7B
BC:Z:GGATGAGGTCCAAGAGCGACATCATT-Xuan_Zm_8_geno_scifi-merged	2554	1249	2181	0	1555	3.19173	0.489037	0.853955	0	2554	Singlet	GGATGAGGTCCAAGAG	CGACA	TCATT	M162W	3.77063	1.84978	0.0887218	singlet	3	Vascular_parenchyma_precursor	M162W
BC:Z:GTGACATTCGCTGATAAATTGTCGGA-Xuan_Zm_8_geno_scifi-merged	1069	463	870	0	652	2.81425	0.433115	0.813845	0	1069	Singlet	GTGACATTCGCTGATA	AATTG	TCGGA	B73	3.47749	-0.485581	0.0541353	singlet	13	Vascular_parenchyma_precursor	B73_rep1
BC:Z:GTGATCATCCACGGCATCGCTCGAGG-Xuan_Zm_8_geno_scifi-merged	1648	794	1342	0	1004	3.00173	0.481796	0.81432	0	1648	Singlet	GTGATCATCCACGGCA	TCGCT	CGAGG	OH7B	-4.19585	-0.897053	0.0917293	singlet	11	Ground_meristem	OH7B
BC:Z:GTGGATTAGCGTATCTCGACACGAGG-Xuan_Zm_8_geno_scifi-merged	4354	1948	3643	0	2645	3.42243	0.447405	0.836702	0	4354	Singlet	GTGGATTAGCGTATCT	CGACA	CGAGG	OH7B	-2.40793	4.25028	0.0977444	singlet	1	Bundle_sheath	OH7B
BC:Z:TAACAGCTCCCGGGTATATACCGAGG-Xuan_Zm_8_geno_scifi-merged	8301	3918	6842	0	4961	3.69557	0.471991	0.824238	0	8301	Singlet	TAACAGCTCCCGGGTA	TATAC	CGAGG	OH7B	0.311964	1.48599	0.0586466	singlet	7	Xylem	OH7B
BC:Z:TACTCGCAGACCATAAACTACTCATT-Xuan_Zm_8_geno_scifi-merged	1644	794	1337	0	996	2.99826	0.482968	0.81326	0	1644	Singlet	TACTCGCAGACCATAA	ACTAC	TCATT	M162W	4.06452	1.66721	0.0781955	singlet	12	Vascular_parenchyma_precursor	M162W
BC:Z:TCAGCTCTCCCTAAAGTCGCTGCTCC-Xuan_Zm_8_geno_scifi-merged	2884	1450	2393	0	1768	3.24748	0.502774	0.82975	0	2884	Singlet	TCAGCTCTCCCTAAAG	TCGCT	GCTCC	Mo18W	3.32503	1.20596	0.043609	singlet	3	Vascular_parenchyma_precursor	Mo18W
BC:Z:TCAGGTAGTTACCCAAACTACCGAGG-Xuan_Zm_8_geno_scifi-merged	2180	1109	1775	0	1359	3.13322	0.508716	0.81422	0	2180	Singlet	TCAGGTAGTTACCCAA	ACTAC	CGAGG	OH7B	4.51522	0.868292	0.0526316	singlet	13	Vascular_parenchyma_precursor	OH7B
BC:Z:TGCTCGTAGTCGCCTGACTACCGAGG-Xuan_Zm_8_geno_scifi-merged	4751	2386	4170	0	2844	3.45393	0.50221	0.87771	0	4751	Singlet	TGCTCGTAGTCGCCTG	ACTAC	CGAGG	OH7B	4.08773	-0.365606	0.0736842	singlet	3	Vascular_parenchyma_precursor	OH7B
BC:Z:TGGGTTACACCTCGTTTATACGCTCC-Xuan_Zm_8_geno_scifi-merged	1746	852	1434	0	1058	3.02449	0.487973	0.821306	0	1746	Singlet	TGGGTTACACCTCGTT	TATAC	GCTCC	Mo18W	4.93478	-0.35782	0.0210526	singlet	13	Vascular_parenchyma_precursor	Mo18W
BC:Z:TTCATCACAAACCTACACTACTCATT-Xuan_Zm_8_geno_scifi-merged	3001	1372	2386	0	1839	3.26458	0.457181	0.795068	0	3001	Singlet	TTCATCACAAACCTAC	ACTAC	TCATT	M162W	-1.89121	4.45212	0.0842105	singlet	1	Bundle_sheath	M162W
BC:Z:TTCGTTAAGAGCTCCCAATTGTCGGA-Xuan_Zm_8_geno_scifi-merged	6855	3519	5840	0	4087	3.6114	0.513348	0.851933	0	6855	Singlet	TTCGTTAAGAGCTCCC	AATTG	TCGGA	B73	5.00477	0.868557	0.103759	singlet	4	Vascular_parenchyma_precursor	B73_rep1
BC:Z:TTGCAGACACAGATGGAATTGCGAGG-Xuan_Zm_8_geno_scifi-merged	2150	1055	1801	0	1300	3.11394	0.490698	0.837674	0	2150	Singlet	TTGCAGACACAGATGG	AATTG	CGAGG	OH7B	-2.66006	2.10451	0.0526316	singlet	3	Vascular_parenchyma_precursor	OH7B
BC:Z:TTGTTGTTCTTTATCGCGTATCGAGG-Xuan_Zm_8_geno_scifi-merged	1375	580	945	0	835	2.92169	0.421818	0.687273	0	1375	Singlet	TTGTTGTTCTTTATCG	CGTAT	CGAGG	OH7B	-4.47678	-1.426	0.0766917	singlet	11	Ground_meristem	OH7B
BC:Z:TTTACGTAGGTACTCTCTTAGCGAGG-Xuan_Zm_8_geno_scifi-merged	1420	679	1137	0	862	2.93551	0.478169	0.800704	0	1420	Singlet	TTTACGTAGGTACTCT	CTTAG	CGAGG	OH7B	-3.35349	1.56815	0.0466165	singlet	2	Bundle_sheath	OH7B
BC:Z:TTTGGCCTCGGTCAGCAGTAACGAGG-Xuan_Zm_8_geno_scifi-merged	3653	1738	2882	0	2211	3.34459	0.475773	0.788941	0	3653	Singlet	TTTGGCCTCGGTCAGC	AGTAA	CGAGG	OH7B	2.17758	2.66188	0.081203	singlet	6	Vascular_parenchyma	OH7B
BC:Z:TTTGGTTTCTATTTCGTATACGCTCC-Xuan_Zm_8_geno_scifi-merged	1259	632	1065	0	777	2.89042	0.501986	0.845909	0	1259	Singlet	TTTGGTTTCTATTTCG	TATAC	GCTCC	Mo18W	-2.69316	1.45515	0.043609	singlet	2	Bundle_sheath	Mo18W
BC:Z:CTCTAGCTCATCGCCTTCGCTACCGG-Xuan_Zm_8_geno_scifi-merged	1153	508	758	0	705	2.84819	0.44059	0.657415	0	1153	Singlet	CTCTAGCTCATCGCCT	TCGCT	ACCGG	Tzi8	-4.49229	-1.73516	0.0676692	singlet	11	Ground_meristem	Tzi8
BC:Z:TCAAGGTCACCGAAAGGGAATAGCTT-Xuan_Zm_8_geno_scifi-merged	1439	718	1195	0	885	2.94694	0.498958	0.830438	0	1439	Singlet	TCAAGGTCACCGAAAG	GGAAT	AGCTT	B73	-1.46294	-1.95471	0.0827068	singlet	5	Axillary_meristem	B73_rep2
BC:Z:ATCCCTGCATGGGTGACGTATACTAA-Xuan_Zm_8_geno_scifi-merged	2817	1352	2303	0	1707	3.23223	0.479943	0.817536	0	2817	Singlet	ATCCCTGCATGGGTGA	CGTAT	ACTAA	Ky21	4.24336	1.43671	0.0721805	singlet	12	Vascular_parenchyma_precursor	Ky21
[truncated: 124,339 more rows]

## Sheet: Table S5
Table S5: Marker gene used in this study, Please find the detailed marker information in Marand et. al. 2021
Name	geneID	type
Ad1	Zm00001eb046050	epidermis
Bif2	Zm00001eb031760	axillary_meristem
[truncated: 48 more rows]

## Sheet: Table S6
Table S6: GO enrichment from gene set enrichment analysis for integrated scifi-ATAC-seq and scATAC-seq.
[truncated: 1,274 more rows]

[truncated: 3 more sheets: Table S7, Table S8, Table S9]
